# Supplementary material for: A conserved mycobacterial nucleomodulin hijacks the host COMPASS complex to reprogram pro-inflammatory transcription and promote intracellular survival
Source: eLife. 2026 Mar 31;14:RP107677. doi: 10.7554/eLife.107677 (PMC13038263; doi:10.7554/eLife.107677)
Supplement: Supplementary file 1. [file elife-107677-supp1.xlsx]

## Sheet: Mtu-Signal P
SignalP-5.0 Prediction for M. tuberculosis Secreted Proteins
# SignalP-5.0	Organism: gram+	Timestamp: 20220701034510
# ID	Prediction	SP(Sec/SPI)	TAT(Tat/SPI)	LIPO(Sec/SPII)	OTHER	CS Position
Rv3630	OTHER	0.103031	0.040142	0.029119	0.827708
Rv3631	OTHER	0.006934	0.000562	0.000842	0.991662
Rv2302	OTHER	0.007502	0.000574	0.001347	0.990578
Rv2301	TAT(Tat/SPI)	0.144848	0.837677	0.007238	0.010237	CS pos: 32-33. VPA-GY. Pr: 0.4172
Rv3635	OTHER	0.097177	0.000754	0.002248	0.899821
Rv3632	OTHER	0.035069	0.028563	0.006166	0.930202
Rv3633	OTHER	0.002358	0.005783	0.000296	0.991562
Rv1186c	OTHER	0.301777	0.00457	0.059338	0.634315
Rv3638	OTHER	0.009585	0.007387	0.001778	0.98125
Rv2305	OTHER	0.005566	0.029691	0.000476	0.964267
Rv0821c	OTHER	0.012139	0.004383	0.00146	0.982018
Rv2308	OTHER	0.017211	0.001773	0.001947	0.979069
Rv2914c	OTHER	0.04218	0.03198	0.375716	0.550124
Rv3636	OTHER	0.02183	0.016434	0.00405	0.957685
Rv3637	OTHER	0.01573	0.006201	0.004193	0.973876
Rv3450c	OTHER	0.04495	0.003837	0.062894	0.88832
Rv3583c	OTHER	0.004944	0.000266	0.000964	0.993826
Rv1053c	OTHER	0.009706	0.000772	0.001418	0.988104
Rv3014c	OTHER	0.007081	0.000563	0.001531	0.990825
Rv3809c	OTHER	0.094827	0.069386	0.018217	0.81757
Rv0591	SP(Sec/SPI)	0.830278	0.062066	0.017567	0.090089	CS pos: 38-39. LFA-TP. Pr: 0.6442
Rv0590	OTHER	0.056482	0.000595	0.007673	0.93525
Rv0593	LIPO(Sec/SPII)	0.045745	0.00728	0.858191	0.088784	CS pos: 45-46. LTS-CT. Pr: 0.8592
Rv0592	OTHER	0.220926	0.051501	0.03159	0.695982
Rv0594	OTHER	0.025125	0.001041	0.00346	0.970374
Rv3623	LIPO(Sec/SPII)	0.001505	0.000237	0.997858	0.000399	CS pos: 22-23. LSG-CD. Pr: 0.9985
Rv0516c	OTHER	0.027006	0.004589	0.01419	0.954215
Rv3279c	OTHER	0.025278	0.079174	0.002744	0.892803
Rv0822c	OTHER	0.020176	0.004305	0.001882	0.973637
Rv3628	OTHER	0.007204	0.000365	0.000874	0.991557
Rv2915c	OTHER	0.02693	0.000719	0.000829	0.971522
Rv3582c	OTHER	0.01132	0.002026	0.004101	0.982552
Rv2382c	OTHER	0.007952	0.000442	0.001123	0.990483
Rv2250A	OTHER	0.011793	0.003617	0.002651	0.981939
Rv3808c	OTHER	0.009651	0.004137	0.001008	0.985204
Rv0582	OTHER	0.00877	0.000242	0.002091	0.988898
Rv0581	OTHER	0.014012	0.007115	0.003646	0.975226
Rv0584	SP(Sec/SPI)	0.856627	0.034193	0.019829	0.089351	CS pos: 30-31. PTA-YD. Pr: 0.3560
Rv0586	OTHER	0.006074	0.011665	0.000661	0.9816
Rv2912c	OTHER	0.014093	0.022144	0.000969	0.962793
Rv0588	OTHER	0.005966	0.046741	0.003671	0.943623
Rv0587	OTHER	0.005632	0.000273	0.001604	0.99249
Rv3611	OTHER	0.051041	0.096539	0.035944	0.816476
Rv0589	OTHER	0.006353	0.000879	0.005599	0.987169
Rv3278c	OTHER	0.033249	0.001921	0.018874	0.945957
Rv3617	OTHER	0.008938	0.002818	0.00082	0.987424
Rv0519c	TAT(Tat/SPI)	0.017718	0.974755	0.001333	0.006195	CS pos: 55-56. PQA-AP. Pr: 0.3596
Rv1051c	OTHER	0.009007	0.001624	0.000583	0.988786
Rv1184c	SP(Sec/SPI)	0.971988	0.004667	0.019862	0.003484	CS pos: 25-26. AIA-AS. Pr: 0.6958
Rv3618	OTHER	0.040857	0.001098	0.003981	0.954064
Rv2609c	OTHER	0.363846	0.004409	0.097226	0.534519
Rv3581c	OTHER	0.064215	0.001584	0.144413	0.789788
Rv3012c	OTHER	0.011802	0.011778	0.000862	0.975558
Rv2250c	OTHER	0.009107	0.008278	0.010632	0.971983
Rv2383c	OTHER	0.009162	0.002637	0.002117	0.986084
Rv3807c	OTHER	0.02201	0.003951	0.018524	0.955516
Rv0570	OTHER	0.020853	0.010401	0.006575	0.96217
Rv2913c	OTHER	0.018331	0.019098	0.001114	0.961457
Rv0577	OTHER	0.063541	0.005489	0.004303	0.926667
Rv0576	OTHER	0.011023	0.236689	0.002483	0.749804
Rv0579	OTHER	0.002485	0.000762	0.000427	0.996326
Rv0953c	OTHER	0.031445	0.011016	0.009227	0.948311
Rv3580c	OTHER	0.0125	0.011198	0.010434	0.965869
Rv1185c	OTHER	0.003028	0.000413	0.000915	0.995644
Rv3011c	OTHER	0.007685	0.003469	0.00166	0.987187
Rv3144c	TAT(Tat/SPI)	0.230934	0.460209	0.022833	0.286023	CS pos: 35-36. GLA-EE. Pr: 0.1586
Rv2077c	OTHER	0.008832	0.001716	0.000978	0.988474
Rv3670	OTHER	0.020942	0.000972	0.006392	0.971694
Rv3806c	OTHER	0.010073	0.002112	0.008649	0.979165
Rv1011	OTHER	0.004213	0.000211	0.000834	0.994741
Rv2342	OTHER	0.042911	0.014761	0.061583	0.880745
Rv1010	OTHER	0.021956	0.001744	0.002836	0.973465
Rv2341	LIPO(Sec/SPII)	0.010377	0.054802	0.933577	0.001243	CS pos: 31-32. LSA-CG. Pr: 0.9313
Rv3675	OTHER	0.170696	0.030006	0.223846	0.575452
Rv1013	OTHER	0.091466	0.071734	0.008673	0.828127
Rv1012	OTHER	0.088466	0.024079	0.022457	0.864997
Rv2345	SP(Sec/SPI)	0.986134	0.008761	0.003711	0.001395	CS pos: 26-27. AGA-QP. Pr: 0.9665
Rv3679	OTHER	0.078645	0.035894	0.021804	0.863657
Rv0646c	OTHER	0.005324	0.000812	0.000606	0.993257
Rv2910c	OTHER	0.00379	0.000584	0.00051	0.995116
Rv3676	OTHER	0.012011	0.003884	0.00231	0.981796
Rv1019	OTHER	0.016005	0.004771	0.004551	0.974672
Rv3276c	OTHER	0.325876	0.0973	0.068147	0.508677
Rv0950c	OTHER	0.000611	0.000146	0.000113	0.99913
Rv3010c	OTHER	0.013567	0.000327	0.009011	0.977095
Rv1845c	OTHER	0.327725	0.124051	0.047479	0.500745
Rv1979c	OTHER	0.035109	0.001543	0.033093	0.930255
Rv2381c	OTHER	0.010822	0.001811	0.00151	0.985857
Rv3805c	OTHER	0.139684	0.003687	0.162055	0.694575
Rv2331	OTHER	0.023958	0.007404	0.003742	0.964896
Rv3661	OTHER	0.015851	0.008813	0.001672	0.973665
Rv1001	OTHER	0.003501	0.000184	0.00043	0.995885
Rv2332	OTHER	0.016709	0.01988	0.001664	0.961747
Rv2335	OTHER	0.006898	0.00323	0.001136	0.988736
Rv3667	OTHER	0.018684	0.003424	0.001291	0.976601
Rv0645c	OTHER	0.001749	0.000182	0.000323	0.997746
Rv1003	OTHER	0.063636	0.136198	0.009247	0.790918
Rv2334	OTHER	0.002675	0.000519	0.000323	0.996483
Rv1006	LIPO(Sec/SPII)	0.033688	0.007719	0.95716	0.001432	CS pos: 26-27. LNG-CS. Pr: 0.9521
Rv2336	OTHER	0.01544	0.033806	0.00272	0.948034
Rv1008	OTHER	0.028959	0.02628	0.005191	0.93957
Rv2339	OTHER	0.182772	0.013247	0.010114	0.793867
Rv3669	OTHER	0.06842	0.014978	0.005947	0.910656
Rv1009	LIPO(Sec/SPII)	0.247929	0.000709	0.745793	0.005568	CS pos: 23-24. VAA-CK. Pr: 0.7500
Rv3275c	OTHER	0.013266	0.001941	0.001046	0.983746
Rv2380c	OTHER	0.012351	0.001518	0.004382	0.981748
Rv3142c	OTHER	0.008973	0.001784	0.00074	0.988503
Rv1846c	OTHER	0.001575	0.000485	0.000478	0.997461
Rv2075c	SP(Sec/SPI)	0.911211	0.085325	0.002575	0.000889	CS pos: 30-31. ADA-YQ. Pr: 0.5742
Rv3652	TAT(Tat/SPI)	0.350338	0.373321	0.022351	0.25399	CS pos: 44-45. AGA-DE. Pr: 0.1048
Rv3653	OTHER	0.470774	0.040329	0.012562	0.476336
Rv3650	TAT(Tat/SPI)	0.230653	0.388592	0.014742	0.366013	CS pos: 43-44. AAA-HD. Pr: 0.1524
Rv2605c	OTHER	0.017926	0.054489	0.000489	0.927097
Rv3651	OTHER	0.008089	0.010593	0.00137	0.979947
Rv2324	OTHER	0.007169	0.003415	0.00107	0.988345
Rv2328	OTHER	0.239639	0.374008	0.008007	0.378346
Rv2327	OTHER	0.012722	0.021903	0.00126	0.964115
Rv2738c	OTHER	0.122693	0.097325	0.004328	0.775654
Rv3274c	OTHER	0.00446	0.000984	0.000759	0.993797
Rv3804c	TAT(Tat/SPI)	0.137075	0.837983	0.008355	0.016587	CS pos: 43-44. AGA-FS. Pr: 0.4209
Rv1843c	OTHER	0.007385	0.006178	0.000574	0.985864
Rv1976c	OTHER	0.006952	0.00083	0.000846	0.991372
Rv2077A	OTHER	0.168744	0.140227	0.020735	0.670294
Rv2076c	OTHER	0.024316	0.001238	0.053261	0.921185
Rv2311	OTHER	0.008698	0.001173	0.002419	0.98771
Rv2310	OTHER	0.037125	0.007558	0.007005	0.948312
Rv3645	OTHER	0.010142	0.018062	0.013621	0.958175
Rv2312	OTHER	0.008311	0.006279	0.001271	0.984139
Rv3643	OTHER	0.013347	0.016321	0.004675	0.965656
Rv0647c	OTHER	0.014964	0.002088	0.002076	0.980872
Rv0779c	OTHER	0.047456	0.001012	0.003161	0.94837
Rv2317	SP(Sec/SPI)	0.493343	0.140499	0.028833	0.337325	CS pos: 38-39. TSA-HQ. Pr: 0.3339
Rv3649	OTHER	0.101688	0.066089	0.073445	0.758778
Rv2316	OTHER	0.001664	0.007734	0.006554	0.984048
Rv2739c	OTHER	0.046518	0.013275	0.004258	0.93595
Rv2318	SP(Sec/SPI)	0.458034	0.062907	0.067976	0.411083	CS pos: 32-33. LSA-EP. Pr: 0.2183
Rv2606c	OTHER	0.013136	0.009591	0.0009	0.976374
Rv3803c	SP(Sec/SPI)	0.896461	0.095018	0.005758	0.002763	CS pos: 33-34. AKA-AP. Pr: 0.6637
Rv1844c	OTHER	0.032224	0.012099	0.007273	0.948404
Rv0165c	OTHER	0.009066	0.006907	0.002085	0.981943
Rv0520	OTHER	0.009537	0.000712	0.000707	0.989044
Rv1851	OTHER	0.025694	0.00577	0.006467	0.962068
Rv1850	OTHER	0.010335	0.000873	0.00139	0.987402
Rv0522	OTHER	0.111357	0.012838	0.029481	0.846324
Rv1853	OTHER	0.030867	0.025758	0.008041	0.935334
Rv0521	OTHER	0.001992	0.000513	0.000356	0.997139
Rv1852	OTHER	0.029968	0.007699	0.008468	0.953865
Rv2126c	OTHER	0.437216	0.018608	0.007379	0.536797
Rv0524	OTHER	0.140086	0.302632	0.110259	0.447023
Rv3761c	OTHER	0.004876	0.004901	0.000856	0.989367
Rv0526	LIPO(Sec/SPII)	0.005686	0.064071	0.929478	0.000765	CS pos: 30-31. LTG-CS. Pr: 0.9296
Rv1857	LIPO(Sec/SPII)	0.005151	0.004917	0.989602	0.00033	CS pos: 21-22. LVA-CG. Pr: 0.9888
Rv3894c	OTHER	0.010755	0.000288	0.001819	0.987138
Rv0525	OTHER	0.073567	0.147304	0.002359	0.77677
Rv0528	SP(Sec/SPI)	0.717957	0.058773	0.098069	0.125201	CS pos: 35-36. LNA-AK. Pr: 0.4497
Rv1859	OTHER	0.009055	0.011325	0.001237	0.978383
Rv0527	SP(Sec/SPI)	0.466812	0.047541	0.099516	0.386131	CS pos: 29-30. SFA-SP. Pr: 0.3747
Rv1364c	OTHER	0.004485	0.003925	0.000461	0.991129
Rv1858	OTHER	0.022076	0.002603	0.007534	0.967787
Rv1231c	OTHER	0.015369	0.00042	0.005748	0.978463
Rv0529	OTHER	0.237997	0.017002	0.015995	0.729006
Rv1498A	OTHER	0.007807	0.001254	0.000421	0.990517
Rv3458c	OTHER	0.008281	0.003922	0.004039	0.983758
Rv2430c	OTHER	0.005841	0.001639	0.001982	0.990538
Rv2696c	OTHER	0.017596	0.004909	0.003562	0.973933
Rv0511	OTHER	0.199443	0.083434	0.017884	0.69924
Rv0510	OTHER	0.067211	0.021218	0.019901	0.89167
Rv0513	OTHER	0.015631	0.000587	0.00513	0.978652
Rv0512	OTHER	0.029039	0.006879	0.012024	0.952057
Rv3893c	OTHER	0.220954	0.053711	0.024291	0.701044
Rv0515	OTHER	0.013949	0.009192	0.003227	0.973633
Rv0514	OTHER	0.179811	0.077692	0.364834	0.377662
Rv0517	OTHER	0.023083	0.00278	0.007169	0.966968
Rv1365c	OTHER	0.021758	0.0041	0.001961	0.972182
Rv1848	OTHER	0.0095	0.004534	0.001942	0.984023
Rv1232c	OTHER	0.004431	0.000863	0.001302	0.993404
Rv1847	OTHER	0.032927	0.003492	0.000592	0.96299
Rv0518	LIPO(Sec/SPII)	0.224423	0.005893	0.559182	0.210502	CS pos: 23-24. NPG-CP. Pr: 0.4583
Rv1849	OTHER	0.009883	0.003164	0.001867	0.985086
Rv1366A	OTHER	0.00879	0.000801	0.001425	0.988984
Rv1498c	OTHER	0.037743	0.00186	0.00595	0.954447
Rv3324c	OTHER	0.029184	0.031937	0.003355	0.935524
Rv3457c	OTHER	0.018264	0.024466	0.00073	0.95654
Rv2124c	OTHER	0.013196	0.001427	0.001883	0.983494
Rv0470c	OTHER	0.003438	0.000176	0.000458	0.995928
Rv2693c	OTHER	0.046718	0.13113	0.030951	0.791201
Rv0827c	OTHER	0.006106	0.000859	0.000612	0.992424
Rv2257c	SP(Sec/SPI)	0.500893	0.173874	0.023731	0.301501	CS pos: 27-28. VLA-TH. Pr: 0.2356
Rv0500	OTHER	0.028942	0.007942	0.01589	0.947225
Rv1831	OTHER	0.04032	0.004069	0.049768	0.905843
Rv1830	OTHER	0.039082	0.012529	0.006095	0.942294
Rv0502	OTHER	0.028939	0.006317	0.005612	0.959132
Rv3323c	OTHER	0.010097	0.000372	0.007254	0.982277
Rv3892c	OTHER	0.108879	0.17912	0.005509	0.706492
Rv0501	OTHER	0.0249	0.005821	0.026851	0.942428
Rv1832	OTHER	0.057017	0.025778	0.0026	0.914604
Rv1834	OTHER	0.016591	0.001407	0.004433	0.977568
Rv0506	OTHER	0.161168	0.001306	0.063389	0.774137
Rv0508	OTHER	0.019846	0.003397	0.0075	0.969258
Rv0507	OTHER	0.198014	0.00622	0.01009	0.785676
Rv1362c	OTHER	0.016712	0.0061	0.003896	0.973292
Rv0509	OTHER	0.010181	0.000586	0.001709	0.987524
Rv3324A	OTHER	0.074634	0.003677	0.025475	0.896214
Rv3456c	OTHER	0.048703	0.026563	0.002801	0.921933
Rv0470A	OTHER	0.016252	0.000496	0.097944	0.885307
Rv2694c	OTHER	0.025224	0.003602	0.002733	0.968441
Rv0828c	OTHER	0.096545	0.023588	0.017199	0.862669
Rv2258c	OTHER	0.046483	0.097279	0.002958	0.85328
Rv1820	OTHER	0.021211	0.022975	0.006927	0.948887
Rv1822	OTHER	0.176026	0.003794	0.005578	0.814602
Rv1821	OTHER	0.037211	0.008411	0.009722	0.944656
Rv3322c	OTHER	0.014777	0.00632	0.001499	0.977404
Rv3455c	OTHER	0.034677	0.027672	0.004819	0.932832
Rv1824	OTHER	0.127117	0.004768	0.011988	0.856127
Rv1823	OTHER	0.008582	0.00991	0.001598	0.97991
Rv3019c	OTHER	0.059077	0.009547	0.007403	0.923973
Rv1826	OTHER	0.012518	0.006771	0.000652	0.98006
Rv1825	OTHER	0.019996	0.064336	0.010273	0.905396
Rv1363c	OTHER	0.013721	0.026854	0.002387	0.957039
Rv1828	OTHER	0.0081	0.001524	0.001976	0.9884
Rv1230c	SP(Sec/SPI)	0.738628	0.157122	0.032404	0.071845	CS pos: 46-47. GSA-AP. Pr: 0.3316
Rv1827	OTHER	0.012716	0.018667	0.00067	0.967947
Rv3891c	OTHER	0.016495	0.00299	0.001155	0.979359
Rv1829	OTHER	0.00393	0.000216	0.000455	0.9954
Rv3588c	OTHER	0.018147	0.005344	0.003256	0.973253
Rv2388c	OTHER	0.041633	0.001444	0.210622	0.746301
Rv2122c	OTHER	0.005013	0.001312	0.000974	0.9927
Rv2255c	OTHER	0.020471	0.012544	0.007662	0.959323
Rv1891	SP(Sec/SPI)	0.725655	0.257826	0.007091	0.009429	CS pos: 24-25. AGA-DP. Pr: 0.7187
Rv0562	OTHER	0.018719	0.001879	0.003739	0.975663
Rv1893	OTHER	0.006471	0.002265	0.000782	0.990482
Rv0959A	OTHER	0.0081	0.005519	0.000991	0.98539
Rv1892	OTHER	0.006204	0.000246	0.04288	0.950669
Rv1895	OTHER	0.070623	0.001937	0.007051	0.920389
Rv0563	OTHER	0.022254	0.003053	0.020649	0.954044
Rv0825c	TAT(Tat/SPI)	0.066751	0.687762	0.004831	0.240656	CS pos: 46-47. VRA-VC. Pr: 0.5900
Rv0568	OTHER	0.019755	0.032435	0.074816	0.872993
Rv0567	OTHER	0.135668	0.014562	0.005593	0.844178
Rv1898	OTHER	0.049415	0.001547	0.005115	0.943923
Rv3587c	OTHER	0.305715	0.294221	0.009491	0.390572
Rv3018c	OTHER	0.177093	0.103247	0.021461	0.698199
Rv3321c	OTHER	0.022195	0.00679	0.008498	0.962518
Rv0569	OTHER	0.005785	0.000307	0.000638	0.99327
Rv2918c	OTHER	0.005927	0.000605	0.000445	0.993023
Rv3890c	OTHER	0.008047	0.001744	0.000499	0.989711
Rv2256c	OTHER	0.070522	0.079078	0.006875	0.843525
Rv0160c	OTHER	0.125775	0.095324	0.008942	0.769958
Rv0293c	OTHER	0.034463	0.022559	0.002259	0.940719
Rv0553	OTHER	0.008992	0.001962	0.000857	0.988189
Rv0552	OTHER	0.013155	0.001309	0.001552	0.983984
Rv2389c	SP(Sec/SPI)	0.680801	0.054874	0.013409	0.250916	CS pos: 49-50. SKA-DD. Pr: 0.6760
Rv0555	OTHER	0.019862	0.002079	0.004172	0.973887
Rv0554	OTHER	0.025164	0.001507	0.004314	0.969014
Rv0557	OTHER	0.0091	0.001023	0.001757	0.98812
Rv1361c	OTHER	0.043859	0.012312	0.006047	0.937782
Rv0556	OTHER	0.012142	0.000657	0.005036	0.982165
Rv1887	OTHER	0.099572	0.003463	0.008841	0.888124
Rv3017c	OTHER	0.084883	0.012451	0.016168	0.886497
Rv0558	OTHER	0.015405	0.003168	0.000853	0.980575
Rv3320c	OTHER	0.039487	0.002599	0.004526	0.953388
Rv3018A	OTHER	0.238059	0.090725	0.079898	0.591319
Rv2919c	OTHER	0.01441	0.000581	0.001112	0.983897
Rv2386c	OTHER	0.297417	0.056319	0.04542	0.600844
Rv0296c	OTHER	0.00679	0.004162	0.000912	0.988136
Rv2120c	OTHER	0.096957	0.00377	0.082816	0.816457
Rv0540	OTHER	0.082504	0.02323	0.013842	0.880424
Rv1873	OTHER	0.008063	0.002498	0.001475	0.987964
Rv1875	OTHER	0.06822	0.030015	0.007427	0.894338
Rv1874	OTHER	0.035261	0.050833	0.012097	0.901809
Rv0823c	OTHER	0.088624	0.088071	0.014687	0.808618
Rv1877	OTHER	0.204794	0.097242	0.047407	0.650556
Rv2916c	OTHER	0.003698	0.001703	0.001392	0.993207
Rv1876	OTHER	0.002014	0.000252	0.000318	0.997416
Rv1879	OTHER	0.004868	0.000994	0.005126	0.989012
Rv1491c	OTHER	0.027636	0.002772	0.014763	0.954829
Rv1878	OTHER	0.198018	0.014931	0.016622	0.770429
Rv2254c	OTHER	0.069594	0.006759	0.014847	0.9088
Rv0162c	OTHER	0.005881	0.000383	0.000773	0.992963
Rv2121c	OTHER	0.009148	0.000712	0.000973	0.989167
Rv2690c	OTHER	0.042443	0.005112	0.007831	0.944615
Rv0295c	OTHER	0.054665	0.022361	0.290419	0.632555
Rv1860	SP(Sec/SPI)	0.576571	0.403249	0.018819	0.001362	CS pos: 39-40. ANA-DP. Pr: 0.6809
Rv0531	OTHER	0.003607	0.000354	0.016093	0.979946
Rv1862	OTHER	0.054046	0.007379	0.032609	0.905966
Rv0530	OTHER	0.099287	0.062586	0.031146	0.80698
Rv1861	OTHER	0.03644	0.00032	0.002815	0.960425
Rv0532	SP(Sec/SPI)	0.346227	0.333795	0.022946	0.297032	CS pos: 30-31. ANA-AA. Pr: 0.0931
Rv0824c	OTHER	0.006507	0.000146	0.000405	0.992942
Rv0535	OTHER	0.243715	0.019453	0.045986	0.690846
Rv1866	OTHER	0.014138	0.00346	0.001135	0.981267
Rv1868	OTHER	0.053002	0.03335	0.013557	0.900092
Rv0536	OTHER	0.187548	0.021956	0.023436	0.767059
Rv1867	OTHER	0.007558	0.000853	0.001133	0.990456
Rv0539	OTHER	0.017137	0.003735	0.003089	0.976039
Rv0538	OTHER	0.010952	0.001354	0.001548	0.986146
Rv3015c	OTHER	0.105912	0.020615	0.011803	0.86167
Rv2438A	OTHER	0.013307	0.004493	0.004798	0.977403
Rv2304c	OTHER	0.012434	0.001358	0.002485	0.983723
Rv1106c	OTHER	0.028726	0.091292	0.008009	0.871973
Rv1542c	OTHER	0.003945	0.000286	0.000245	0.995523
Rv1675c	OTHER	0.021478	0.015105	0.003228	0.960189
Rv3503c	OTHER	0.007599	0.000623	0.001965	0.989813
Rv1239c	OTHER	0.068473	0.035822	0.012536	0.883169
Rv2438c	OTHER	0.096141	0.013036	0.033835	0.856988
Rv2306A	OTHER	0.017431	0.015444	0.013148	0.953977
Rv2306B	OTHER	0.049251	0.008662	0.00873	0.933357
Rv0039c	SP(Sec/SPI)	0.420211	0.054182	0.341353	0.184253	CS pos: 24-25. SLC-HT. Pr: 0.1355
Rv1107c	OTHER	0.003569	0.000485	0.001274	0.994673
Rv1410c	OTHER	0.030408	0.000997	0.154353	0.814242
Rv3502c	OTHER	0.127362	0.109985	0.004777	0.757876
Rv0212c	OTHER	0.006128	0.002228	0.001387	0.990257
Rv2435c	OTHER	0.083311	0.023196	0.017209	0.876284
Rv2568c	OTHER	0.162352	0.02083	0.03276	0.784059
Rv1673c	OTHER	0.013458	0.000448	0.00149	0.984604
Rv3767c	OTHER	0.236515	0.106814	0.008487	0.648183
Rv3501c	OTHER	0.013861	0.004997	0.005907	0.975236
Rv3634c	OTHER	0.145928	0.002649	0.007838	0.843585
Rv0344c	LIPO(Sec/SPII)	0.001265	0.000216	0.998362	0.000158	CS pos: 22-23. VAG-CN. Pr: 0.9982
Rv2569c	OTHER	0.013357	0.005197	0.008184	0.973262
Rv2303c	OTHER	0.004877	0.000971	0.000458	0.993693
Rv1541c	LIPO(Sec/SPII)	0.011003	0.000184	0.988385	0.000428	CS pos: 15-16. LSA-CA. Pr: 0.9892
Rv1674c	OTHER	0.008117	0.008455	0.002194	0.981234
Rv3500c	OTHER	0.013717	0.001772	0.001273	0.983239
Rv3899c	OTHER	0.305909	0.179808	0.092614	0.421669
Rv2300c	OTHER	0.167569	0.026463	0.024388	0.78158
Rv0472c	OTHER	0.002751	0.00042	0.000523	0.996306
Rv2699c	OTHER	0.009854	0.007127	0.001066	0.981954
Rv0036c	OTHER	0.00293	0.000332	0.000631	0.996107
Rv2433c	OTHER	0.133968	0.115712	0.025177	0.725143
Rv1811	OTHER	0.071584	0.037109	0.2179	0.673407
Rv1810	SP(Sec/SPI)	0.962258	0.013814	0.016622	0.007305	CS pos: 35-36. GKA-DP. Pr: 0.7731
Rv1815	SP(Sec/SPI)	0.958114	0.039329	0.001893	0.000664	CS pos: 27-28. ASA-DP. Pr: 0.8556
Rv1814	SP(Sec/SPI)	0.569429	0.009161	0.046793	0.374617	CS pos: 23-24. TAA-RK. Pr: 0.2232
Rv1817	OTHER	0.112517	0.079192	0.006484	0.801807
Rv1816	OTHER	0.018387	0.09546	0.003298	0.882855
Rv1102c	OTHER	0.114929	0.01178	0.004939	0.868352
Rv3765c	OTHER	0.00688	0.000649	0.000495	0.991976
Rv3898c	OTHER	0.172373	0.076719	0.018454	0.732453
Rv0471c	OTHER	0.036691	0.002726	0.007582	0.953001
Rv2870c	OTHER	0.117676	0.024253	0.00688	0.851192
Rv2434c	OTHER	0.020956	0.008729	0.010639	0.959677
Rv1800	OTHER	0.198725	0.184618	0.016458	0.600199
Rv1802	OTHER	0.162642	0.060469	0.010917	0.765972
Rv1801	OTHER	0.145423	0.073521	0.009286	0.77177
Rv1672c	OTHER	0.116416	0.003903	0.00599	0.873691
Rv1806	OTHER	0.394911	0.138293	0.045344	0.421453
Rv1369c	OTHER	0.013323	0.001265	0.004533	0.980878
Rv1808	OTHER	0.289047	0.129019	0.010955	0.570979
Rv1807	TAT(Tat/SPI)	0.165555	0.443834	0.010923	0.379688	CS pos: 42-43. ASA-LS. Pr: 0.3196
Rv1809	OTHER	0.095856	0.079508	0.004835	0.819801
Rv3328c	OTHER	0.008353	0.001367	0.001116	0.989164
Rv1103c	OTHER	0.117548	0.00636	0.043624	0.832468
Rv3764c	OTHER	0.009102	0.00715	0.002861	0.980887
Rv3897c	SP(Sec/SPI)	0.441306	0.261695	0.034307	0.262692	CS pos: 34-35. MQA-GQ. Pr: 0.2469
Rv2431c	OTHER	0.014489	0.006688	0.003866	0.974957
Rv2697c	OTHER	0.02606	0.057033	0.001564	0.915343
Rv1233c	OTHER	0.236564	0.108754	0.121466	0.533215
Rv3896c	OTHER	0.050835	0.066133	0.007039	0.875992
Rv2432c	OTHER	0.013733	0.006461	0.003595	0.976211
Rv0037c	OTHER	0.014676	0.005136	0.00077	0.979419
Rv2129c	OTHER	0.008757	0.003019	0.002175	0.986049
Rv1101c	OTHER	0.001349	0.000246	0.00582	0.992584
Rv3762c	OTHER	0.021891	0.002059	0.002576	0.973474
Rv3895c	OTHER	0.011496	0.000652	0.009476	0.978376
Rv1367c	OTHER	0.013592	0.055356	0.001161	0.929892
Rv3459c	OTHER	0.076612	0.014213	0.035237	0.873938
Rv3593	LIPO(Sec/SPII)	0.063847	0.255123	0.680496	0.000534	CS pos: 31-32. ASG-CS. Pr: 0.6817
Rv2260	OTHER	0.003441	0.000139	0.000328	0.996092
Rv3594	OTHER	0.005374	0.001451	0.00145	0.991724
Rv2263	OTHER	0.020716	0.103968	0.00229	0.873025
Rv3592	OTHER	0.008582	0.001784	0.001064	0.98857
Rv2265	OTHER	0.082772	0.005719	0.011032	0.900476
Rv2615c	OTHER	0.336153	0.075354	0.023021	0.565473
Rv2266	OTHER	0.007378	0.00038	0.000791	0.991451
Rv2748c	OTHER	0.027827	0.013789	0.004396	0.953988
Rv1720c	OTHER	0.023223	0.016314	0.007698	0.952765
Rv3814c	OTHER	0.014724	0.00183	0.012312	0.971135
Rv2252	OTHER	0.033467	0.13363	0.002846	0.830057
Rv2251	LIPO(Sec/SPII)	0.103374	0.135242	0.705964	0.05542	CS pos: 19-20. ATG-CC. Pr: 0.7238
Rv3586	OTHER	0.016431	0.004623	0.001317	0.977629
Rv2253	SP(Sec/SPI)	0.968525	0.029957	0.0011	0.000418	CS pos: 28-29. VAA-AE. Pr: 0.4807
Rv0653c	OTHER	0.029577	0.103855	0.002235	0.864333
Rv3584	LIPO(Sec/SPII)	0.00374	0.000398	0.995433	0.00043	CS pos: 29-30. LSG-CG. Pr: 0.9944
Rv3585	OTHER	0.044132	0.084226	0.008657	0.862985
Rv0217c	OTHER	0.023094	0.008869	0.012944	0.955093
Rv2259	OTHER	0.023334	0.000789	0.003182	0.972696
Rv3589	OTHER	0.004024	0.001273	0.001628	0.993075
Rv0789c	OTHER	0.017292	0.035998	0.010196	0.936514
Rv3813c	OTHER	0.029803	0.004876	0.039213	0.926108
Rv1721c	OTHER	0.005032	0.003207	0.000303	0.991458
Rv1854c	OTHER	0.01054	0.040424	0.003853	0.945183
Rv3571	OTHER	0.003921	0.001566	0.000728	0.993786
Rv3572	SP(Sec/SPI)	0.987128	0.006864	0.005325	0.000682	CS pos: 24-25. TSA-AG. Pr: 0.4773
Rv2241	OTHER	0.003796	0.001755	0.00079	0.993659
Rv3509c	OTHER	0.0183	0.004775	0.001767	0.975158
Rv2243	OTHER	0.028273	0.007675	0.003305	0.960748
Rv2613c	OTHER	0.010811	0.010339	0.01125	0.9676
Rv2242	OTHER	0.007033	0.003883	0.000948	0.988136
Rv3576	LIPO(Sec/SPII)	0.043139	0.000556	0.955245	0.001059	CS pos: 20-21. AAG-CT. Pr: 0.8157
Rv2245	OTHER	0.11391	0.008217	0.037843	0.84003
Rv2244	OTHER	0.005201	0.000238	0.000449	0.994111
Rv2614A	OTHER	0.024255	0.046813	0.006432	0.922499
Rv3574	OTHER	0.012552	0.043378	0.002957	0.941113
Rv0523c	OTHER	0.043477	0.006701	0.003477	0.946345
Rv2247	OTHER	0.095758	0.053812	0.000792	0.849638
Rv0656c	OTHER	0.026339	0.009603	0.02336	0.940698
Rv2246	OTHER	0.087684	0.057513	0.004588	0.850215
Rv2879c	OTHER	0.054789	0.057442	0.009578	0.878191
Rv2746c	OTHER	0.017124	0.001054	0.004217	0.977604
Rv3577	OTHER	0.151385	0.013528	0.009543	0.825543
Rv2248	OTHER	0.024186	0.00731	0.001571	0.966933
Rv3578	OTHER	0.341458	0.015252	0.071555	0.571734
Rv0787A	OTHER	0.004647	0.000315	0.000353	0.994685
Rv0786c	OTHER	0.013495	0.00078	0.017662	0.968063
Rv1984c	SP(Sec/SPI)	0.95108	0.042793	0.004293	0.001834	CS pos: 32-33. AHA-DP. Pr: 0.8632
Rv1548c	TAT(Tat/SPI)	0.324948	0.326372	0.029461	0.319219	CS pos: 30-31. ASA-WT. Pr: 0.1023
Rv3561	OTHER	0.023331	0.065278	0.001583	0.909808
Rv2232	OTHER	0.143197	0.070956	0.030863	0.754984
Rv3564	OTHER	0.036091	0.149612	0.002865	0.811433
Rv2614c	OTHER	0.032045	0.042577	0.006227	0.919151
Rv3565	OTHER	0.060375	0.028188	0.022712	0.888725
Rv2234	OTHER	0.045166	0.013122	0.00626	0.935453
Rv3562	OTHER	0.01876	0.033586	0.001164	0.946491
Rv3563	OTHER	0.030543	0.129974	0.001942	0.837541
Rv2235	OTHER	0.108537	0.010336	0.056155	0.824972
Rv2237	OTHER	0.060905	0.005059	0.019493	0.914543
Rv1985c	OTHER	0.018176	0.007631	0.001735	0.972458
Rv2744c	OTHER	0.011378	0.000501	0.002064	0.986057
Rv2611c	OTHER	0.018277	0.006842	0.002891	0.97199
Rv2877c	OTHER	0.042807	0.008769	0.087013	0.861411
Rv2309A	OTHER	0.008289	0.007336	0.001537	0.982838
Rv1982c	OTHER	0.22076	0.138122	0.030559	0.610558
Rv2290	LIPO(Sec/SPII)	0.133122	0.085328	0.780292	0.001259	CS pos: 28-29. LPA-CS. Pr: 0.7690
Rv2291	OTHER	0.070061	0.003334	0.0108	0.915805
Rv2294	OTHER	0.009562	0.002556	0.001077	0.986804
Rv2296	OTHER	0.013942	0.001884	0.002173	0.982
Rv2295	OTHER	0.041343	0.011106	0.01976	0.927792
Rv0213c	OTHER	0.112918	0.04173	0.037803	0.807549
Rv2298	OTHER	0.010848	0.002578	0.001648	0.984925
Rv2297	TAT(Tat/SPI)	0.423526	0.455051	0.015957	0.105466	CS pos: 32-33. AEA-YV. Pr: 0.5982
Rv0346c	OTHER	0.024603	0.070296	0.02	0.885101
Rv0479c	OTHER	0.063502	0.025139	0.019233	0.892125
Rv2878c	SP(Sec/SPI)	0.854457	0.072142	0.003428	0.069973	CS pos: 37-38. AVA-AD. Pr: 0.7385
Rv2612c	OTHER	0.008749	0.001037	0.015091	0.975124
Rv2745c	OTHER	0.009071	0.001101	0.001755	0.988073
Rv2309c	OTHER	0.0072	0.000619	0.001033	0.991148
Rv3639c	OTHER	0.081464	0.035522	0.017996	0.865018
Rv2081c	OTHER	0.34269	0.094462	0.043657	0.519191
Rv2281	OTHER	0.003968	0.000611	0.003202	0.992219
Rv2280	OTHER	0.015305	0.006916	0.004885	0.972893
Rv2283	OTHER	0.033883	0.040071	0.010632	0.915413
Rv2285	OTHER	0.0074	0.001163	0.000676	0.990761
Rv2284	OTHER	0.133879	0.03597	0.079799	0.750351
Rv2287	OTHER	0.011788	0.002033	0.004672	0.981507
Rv2307D	OTHER	0.236789	0.145208	0.075059	0.542944
Rv2289	TAT(Tat/SPI)	0.427915	0.516195	0.034699	0.02119	CS pos: 32-33. VPA-RP. Pr: 0.3847
Rv2307B	OTHER	0.327068	0.134485	0.016886	0.521561
Rv2439c	OTHER	0.151424	0.20563	0.009288	0.633659
Rv2742c	OTHER	0.003583	0.00061	0.00126	0.994547
Rv2288	OTHER	0.09781	0.080718	0.034762	0.78671
Rv2307A	OTHER	0.012199	0.002831	0.009937	0.975033
Rv1980c	SP(Sec/SPI)	0.888847	0.000424	0.110471	0.000257	CS pos: 23-24. ATA-AP. Pr: 0.8118
Rv1108c	OTHER	0.006888	0.000629	0.001233	0.991249
Rv1411c	LIPO(Sec/SPII)	0.000941	0.000377	0.998427	0.000255	CS pos: 26-27. VAG-CS. Pr: 0.9989
Rv2270	LIPO(Sec/SPII)	0.00226	0.000227	0.997315	0.000198	CS pos: 20-21. LAA-CS. Pr: 0.9978
Rv2272	OTHER	0.008398	0.051037	0.010326	0.930239
Rv2271	OTHER	0.00294	0.003047	0.000672	0.993342
Rv2273	OTHER	0.237683	0.063195	0.020899	0.678223
Rv2276	OTHER	0.025951	0.002117	0.003343	0.968588
Rv2275	OTHER	0.016152	0.009439	0.002743	0.971666
Rv2743c	OTHER	0.028407	0.012939	0.03065	0.928004
Rv2278	OTHER	0.014446	0.008318	0.004296	0.97294
Rv2307c	OTHER	0.32365	0.035861	0.077522	0.562967
Rv2279	OTHER	0.013323	0.001265	0.004533	0.980878
Rv2610c	OTHER	0.138992	0.054924	0.005755	0.800328
Rv0215c	OTHER	0.01209	0.001834	0.001843	0.984234
Rv0783c	OTHER	0.02589	0.006118	0.008492	0.9595
Rv1981c	OTHER	0.002824	0.000131	0.000331	0.996714
Rv1982A	OTHER	0.006299	0.008852	0.000992	0.983857
Rv1109c	OTHER	0.089809	0.017135	0.009333	0.883723
Rv1728c	OTHER	0.073578	0.0156	0.021017	0.889805
Rv2130c	OTHER	0.035999	0.003243	0.005644	0.955114
Rv3751	OTHER	0.131971	0.040148	0.006719	0.821162
Rv2423	OTHER	0.010045	0.003093	0.001053	0.985808
Rv2422	OTHER	0.030254	0.006696	0.003426	0.959624
Rv3754	OTHER	0.033183	0.013759	0.006969	0.94609
Rv3159c	OTHER	0.17855	0.368908	0.016379	0.436163
Rv0966c	OTHER	0.012366	0.008524	0.002585	0.976525
Rv2429	OTHER	0.02426	0.058606	0.000882	0.916251
Rv3595c	SP(Sec/SPI)	0.406465	0.193354	0.025445	0.374735	CS pos: 30-31. ANA-AA. Pr: 0.2011
Rv2428	OTHER	0.020936	0.002065	0.004233	0.972766
Rv2926c	OTHER	0.00922	0.006099	0.002273	0.982409
Rv3462c	OTHER	0.003658	0.000287	0.000391	0.995664
Rv3026c	OTHER	0.027183	0.009909	0.048161	0.914748
Rv2397c	OTHER	0.012669	0.003299	0.002918	0.981114
Rv2264c	SP(Sec/SPI)	0.471655	0.076392	0.092281	0.359672	CS pos: 22-23. AVA-AD. Pr: 0.2961
Rv1729c	OTHER	0.026285	0.021268	0.003835	0.948612
Rv2131c	OTHER	0.004036	0.00151	0.000574	0.99388
Rv2412	OTHER	0.023749	0.006515	0.003318	0.966417
Rv3744	OTHER	0.019444	0.016847	0.005133	0.958576
Rv0834c	OTHER	0.210064	0.205105	0.01108	0.573751
Rv2927c	OTHER	0.005441	0.000934	0.022001	0.971624
Rv3748	OTHER	0.01011	0.000457	0.003597	0.985837
Rv1199c	OTHER	0.117555	0.207017	0.005247	0.670181
Rv3747	OTHER	0.023414	0.002695	0.009652	0.964239
Rv3461c	OTHER	0.134586	0.01291	0.0541	0.798405
Rv3025c	OTHER	0.012289	0.010745	0.002524	0.974442
Rv2395A	OTHER	0.02736	0.053085	0.006471	0.913084
Rv2395B	OTHER	0.051382	0.024215	0.022118	0.902286
Rv2261c	OTHER	0.348209	0.217523	0.018197	0.416071
Rv2401	OTHER	0.028951	0.051337	0.008298	0.911414
Rv2924c	OTHER	0.016118	0.036253	0.005782	0.941846
Rv3731	OTHER	0.134393	0.028273	0.011533	0.8258
Rv2402	OTHER	0.018145	0.002256	0.001797	0.977802
Rv3732	SP(Sec/SPI)	0.800749	0.025737	0.135469	0.038045	CS pos: 32-33. SYA-CA. Pr: 0.5748
Rv2405	OTHER	0.055794	0.154366	0.002035	0.787806
Rv3737	OTHER	0.034642	0.007709	0.012749	0.9449
Rv2407	OTHER	0.03495	0.009889	0.002609	0.952553
Rv3735	OTHER	0.002971	0.000522	0.000286	0.996221
Rv0831c	OTHER	0.012669	0.001655	0.00089	0.984786
Rv0964c	OTHER	0.067786	0.016713	0.013879	0.901621
Rv3736	OTHER	0.034206	0.006531	0.006375	0.952888
Rv2408	OTHER	0.01731	0.006851	0.001894	0.973945
Rv1063c	OTHER	0.077488	0.041742	0.011487	0.869282
Rv3460c	OTHER	0.005502	0.00101	0.001099	0.992389
Rv3024c	OTHER	0.085318	0.015689	0.027949	0.871044
Rv2262c	OTHER	0.222119	0.107023	0.062749	0.608109
Rv0692	OTHER	0.041277	0.006523	0.009894	0.942306
Rv0694	OTHER	0.029295	0.007658	0.005018	0.958029
Rv0693	OTHER	0.089539	0.004633	0.085949	0.819879
Rv0696	OTHER	0.009826	0.055665	0.002824	0.931686
Rv0695	OTHER	0.07571	0.049424	0.037783	0.837083
Rv3723	OTHER	0.033942	0.000997	0.022296	0.942765
Rv0698	OTHER	0.213706	0.036013	0.012464	0.737816
Rv3720	OTHER	0.010978	0.003743	0.001419	0.983861
Rv0697	OTHER	0.093776	0.028605	0.027346	0.850273
Rv0965c	OTHER	0.058107	0.002933	0.004777	0.934183
Rv3726	OTHER	0.024181	0.000854	0.004247	0.970718
Rv0699	TAT(Tat/SPI)	0.091143	0.584611	0.009734	0.314512	CS pos: 37-38. SWA-SD. Pr: 0.5376
Rv3289c	OTHER	0.061126	0.035494	0.228689	0.674692
Rv3727	SP(Sec/SPI)	0.636689	0.129984	0.024306	0.209021	CS pos: 29-30. AEA-GV. Pr: 0.3502
Rv2925c	OTHER	0.025808	0.005022	0.001011	0.968159
Rv3725	OTHER	0.129437	0.046403	0.017318	0.806841
Rv3728	OTHER	0.119258	0.025579	0.04226	0.812903
Rv1064c	LIPO(Sec/SPII)	0.005747	0.001209	0.991592	0.001453	CS pos: 25-26. VAG-CS. Pr: 0.9834
Rv3729	OTHER	0.004306	0.000209	0.001123	0.994362
Rv3023c	OTHER	0.098961	0.200791	0.00442	0.695828
Rv2089c	OTHER	0.072781	0.301662	0.023553	0.602004
Rv3791	OTHER	0.017119	0.008123	0.010549	0.964209
Rv3792	OTHER	0.042883	0.01146	0.01022	0.935437
Rv1130	OTHER	0.124607	0.010311	0.013126	0.851956
Rv3790	OTHER	0.081056	0.017413	0.024757	0.876774
Rv1132	OTHER	0.002172	0.000142	0.003223	0.994463
Rv2463	OTHER	0.013317	0.031256	0.000811	0.954616
Rv3795	OTHER	0.210413	0.061321	0.0409	0.687366
Rv1131	OTHER	0.068167	0.024702	0.008169	0.898963
Rv3590c	SP(Sec/SPI)	0.410738	0.198971	0.020702	0.369588	CS pos: 33-34. AAA-AP. Pr: 0.1280
Rv3796	TAT(Tat/SPI)	0.019033	0.558594	0.411696	0.010677	CS pos: 43-44. ASA-CS. Pr: 0.5854
Rv1134	OTHER	0.09786	0.058073	0.02186	0.822208
Rv3793	OTHER	0.263202	0.026039	0.025166	0.685593
Rv3794	SP(Sec/SPI)	0.469528	0.108658	0.10174	0.320075	CS pos: 41-42. TTA-TI. Pr: 0.4089
Rv1136	OTHER	0.013326	0.002034	0.003793	0.980847
Rv2467	OTHER	0.005646	0.001478	0.00099	0.991887
Rv3797	OTHER	0.004841	0.000367	0.000636	0.994156
Rv0658c	OTHER	0.070133	0.004658	0.025666	0.899543
Rv2922c	OTHER	0.037462	0.003743	0.006225	0.95257
Rv3798	OTHER	0.018033	0.005027	0.005327	0.971613
Rv3288c	OTHER	0.019359	0.00286	0.006352	0.971429
Rv0962c	LIPO(Sec/SPII)	0.000643	0.000225	0.998675	0.000457	CS pos: 21-22. LAG-CI. Pr: 0.9994
Rv1194c	OTHER	0.007183	0.002033	0.001358	0.989426
Rv2619c	OTHER	0.027628	0.002811	0.005792	0.963769
Rv3591c	OTHER	0.03042	0.005659	0.009989	0.953932
Rv3022c	OTHER	0.177093	0.103247	0.021461	0.698199
Rv1724c	OTHER	0.006682	0.00091	0.002544	0.989864
Rv3780	OTHER	0.007305	0.000468	0.00146	0.990766
Rv3781	OTHER	0.009639	0.002824	0.002123	0.985415
Rv1121	OTHER	0.002873	0.000751	0.001536	0.99484
Rv3784	OTHER	0.004534	0.000844	0.000934	0.993687
Rv2451	OTHER	0.100599	0.13238	0.018929	0.748092
Rv3785	OTHER	0.022039	0.002288	0.001824	0.973849
Rv3782	OTHER	0.007968	0.000888	0.002758	0.988386
Rv1122	OTHER	0.019773	0.002736	0.005379	0.972113
Rv3783	OTHER	0.010959	0.006793	0.003164	0.979085
Rv1125	OTHER	0.008001	0.001265	0.001249	0.989485
Rv2923c	OTHER	0.022795	0.015779	0.007408	0.954017
Rv3788	OTHER	0.004113	0.00051	0.0008	0.994577
Rv1124	OTHER	0.090668	0.010573	0.005111	0.893647
Rv3789	OTHER	0.027793	0.000283	0.002932	0.968992
Rv0657c	OTHER	0.010285	0.001501	0.00424	0.983974
Rv2458	OTHER	0.011496	0.005382	0.000927	0.982195
Rv2459	OTHER	0.16513	0.003734	0.00624	0.824896
Rv0963c	OTHER	0.006726	0.012553	0.000767	0.979954
Rv3287c	OTHER	0.004645	0.002095	0.000653	0.992606
Rv3021c	OTHER	0.089673	0.004579	0.013682	0.892066
Rv3022A	SP(Sec/SPI)	0.433752	0.3213	0.032621	0.212326	CS pos: 42-43. APA-AD. Pr: 0.1126
Rv1725c	OTHER	0.002446	0.000595	0.000781	0.996178
Rv3816c	OTHER	0.0189	0.000943	0.003702	0.976454
Rv1110	OTHER	0.017923	0.007715	0.010005	0.964357
Rv2920c	OTHER	0.001803	0.000131	0.01145	0.986617
Rv3774	OTHER	0.010959	0.000814	0.001141	0.987086
Rv1112	OTHER	0.057008	0.009905	0.007666	0.925421
Rv2443	OTHER	0.025938	0.004642	0.009672	0.959748
Rv3772	OTHER	0.059698	0.025604	0.005508	0.90919
Rv1114	OTHER	0.002856	0.000148	0.00126	0.995737
Rv3777	OTHER	0.013711	0.004366	0.001489	0.980434
Rv1113	OTHER	0.025878	0.064524	0.003368	0.90623
Rv1116	OTHER	0.01794	0.007432	0.008266	0.966362
Rv3775	OTHER	0.006701	0.000706	0.002076	0.990518
Rv1115	SP(Sec/SPI)	0.499805	0.040395	0.0198	0.44	CS pos: 35-36. VVG-TP. Pr: 0.3776
Rv3776	OTHER	0.012827	0.004985	0.001196	0.980991
Rv1117	OTHER	0.014381	0.000866	0.001566	0.983187
Rv3779	OTHER	0.107223	0.002485	0.045473	0.844819
Rv2617c	OTHER	0.00449	0.000544	0.000901	0.994065
Rv3286c	OTHER	0.009303	0.005491	0.004152	0.981054
Rv3020c	OTHER	0.058276	0.032515	0.004466	0.904743
Rv1855c	OTHER	0.019393	0.001225	0.000998	0.978384
Rv3763	LIPO(Sec/SPII)	0.001102	0.00018	0.998519	0.000198	CS pos: 21-22. LSG-CS. Pr: 0.9978
Rv3760	OTHER	0.005612	0.000547	0.010114	0.983727
Rv1100	OTHER	0.03884	0.001862	0.043668	0.915629
Rv3766	OTHER	0.079523	0.006103	0.009413	0.904961
Rv2922A	OTHER	0.033126	0.012099	0.004082	0.950693
Rv1105	OTHER	0.013804	0.00915	0.002035	0.975012
Rv2436	OTHER	0.019841	0.003244	0.001717	0.975198
Rv2921c	OTHER	0.051681	0.029118	0.042329	0.876873
Rv1104	OTHER	0.019692	0.002429	0.005164	0.972715
Rv0659c	OTHER	0.011411	0.003395	0.00316	0.982034
Rv2437	SP(Sec/SPI)	0.625027	0.187628	0.007938	0.179407	CS pos: 37-38. VYA-QL. Pr: 0.5605
Rv3768	OTHER	0.009541	0.000656	0.000705	0.989098
Rv3769	OTHER	0.015177	0.00595	0.003389	0.975484
Rv3815c	OTHER	0.047333	0.004371	0.045428	0.902867
Rv2390c	OTHER	0.042887	0.004206	0.025743	0.927164
Rv1856c	OTHER	0.005833	0.000675	0.000753	0.992739
Rv1989c	OTHER	0.010989	0.002869	0.002667	0.983476
Rv2441c	OTHER	0.011327	0.002792	0.002561	0.98332
Rv0480c	OTHER	0.033423	0.015986	0.003693	0.946897
Rv0044c	OTHER	0.009439	0.000878	0.000755	0.988929
Rv1906c	SP(Sec/SPI)	0.958401	0.010598	0.027609	0.003392	CS pos: 32-33. AGA-DP. Pr: 0.6566
Rv1970	LIPO(Sec/SPII)	0.017224	0.000341	0.979796	0.002639	CS pos: 16-17. VAS-CG. Pr: 0.9791
Rv0641	OTHER	0.020958	0.004683	0.002548	0.971811
Rv1972	OTHER	0.014002	0.002839	0.035839	0.947321
Rv0640	OTHER	0.356862	0.030481	0.051964	0.560693
Rv1971	OTHER	0.023415	0.001116	0.003135	0.972334
Rv1974	SP(Sec/SPI)	0.844411	0.138123	0.014402	0.003065	CS pos: 36-37. ARA-DV. Pr: 0.8928
Rv1973	LIPO(Sec/SPII)	0.073197	0.026441	0.730548	0.169815	CS pos: 20-21. ALT-CG. Pr: 0.6975
Rv2005c	OTHER	0.028506	0.002846	0.034755	0.933892
Rv3640c	OTHER	0.002996	0.000727	0.000572	0.995705
Rv1975	SP(Sec/SPI)	0.732053	0.264643	0.002545	0.000759	CS pos: 27-28. ARA-DD. Pr: 0.9789
Rv1978	OTHER	0.003047	0.000376	0.00077	0.995806
Rv1977	OTHER	0.01083	0.008463	0.001441	0.979266
Rv3773c	OTHER	0.025568	0.001677	0.001468	0.971286
Rv0649	OTHER	0.215613	0.252584	0.016548	0.515256
Rv0648	OTHER	0.013409	0.00267	0.000859	0.983062
Rv1243c	OTHER	0.053484	0.044015	0.006514	0.895987
Rv2442c	OTHER	0.011191	0.000256	0.000779	0.987775
Rv1907c	OTHER	0.116097	0.16618	0.083649	0.634074
Rv0043c	OTHER	0.017501	0.000892	0.011907	0.9697
Rv1961	OTHER	0.047164	0.070699	0.024853	0.857284
Rv1965	OTHER	0.02025	0.001255	0.002087	0.976408
Rv1964	OTHER	0.009004	0.000429	0.006838	0.983729
Rv0636	OTHER	0.020798	0.000876	0.000591	0.977734
Rv1111c	OTHER	0.238234	0.013859	0.020394	0.727513
Rv1967	OTHER	0.163368	0.003235	0.034931	0.798466
Rv0635	OTHER	0.004712	0.000155	0.000666	0.994467
Rv1966	OTHER	0.402507	0.024079	0.056234	0.51718
Rv0638	OTHER	0.023237	0.027116	0.008032	0.941616
Rv1969	SP(Sec/SPI)	0.898958	0.08841	0.003046	0.009586	CS pos: 31-32. ADA-AA. Pr: 0.7082
Rv0637	OTHER	0.005996	0.000168	0.001314	0.992523
Rv1968	OTHER	0.366761	0.049404	0.12607	0.457765
Rv0639	OTHER	0.015578	0.003409	0.003315	0.977697
Rv1377c	OTHER	0.115823	0.002055	0.003189	0.878933
Rv3469c	OTHER	0.020371	0.003492	0.000765	0.975373
Rv3336c	OTHER	0.015265	0.013809	0.003186	0.967739
Rv2572c	OTHER	0.002886	0.002451	0.001285	0.993377
Rv2003c	OTHER	0.069559	0.031822	0.022027	0.876592
Rv0046c	OTHER	0.028153	0.001774	0.012568	0.957505
Rv0179c	SP(Sec/SPI)	0.445948	0.222796	0.324799	0.006457	CS pos: 44-45. ARA-AD. Pr: 0.6124
Rv2269c	OTHER	0.058605	0.012679	0.008802	0.919914
Rv0621	OTHER	0.069246	0.007414	0.007433	0.915906
Rv1952	OTHER	0.053163	0.009324	0.001665	0.935848
Rv2136c	OTHER	0.149225	0.007388	0.037587	0.8058
Rv0620	OTHER	0.015629	0.004152	0.002452	0.977767
Rv0623	OTHER	0.005357	0.004406	0.001299	0.988938
Rv3202c	OTHER	0.042613	0.020681	0.010723	0.925982
Rv0622	OTHER	0.047275	0.003669	0.027948	0.921108
Rv1953	OTHER	0.013851	0.001061	0.00248	0.982609
Rv3771c	OTHER	0.011853	0.002023	0.002284	0.98384
Rv1956	OTHER	0.004499	0.000818	0.000848	0.993834
Rv0624	OTHER	0.004798	0.000236	0.000748	0.994218
Rv1955	OTHER	0.005545	0.000477	0.001095	0.992883
Rv0627	OTHER	0.006183	0.001264	0.000883	0.991669
Rv0626	OTHER	0.005068	0.016509	0.00256	0.975863
Rv1957	OTHER	0.01166	0.009113	0.002098	0.97713
Rv1374c	OTHER	0.019678	0.031948	0.011269	0.937105
Rv3335c	OTHER	0.003226	0.000484	0.002375	0.993915
Rv3468c	SP(Sec/SPI)	0.46683	0.281765	0.007918	0.243488	CS pos: 31-32. AAA-AE. Pr: 0.4752
Rv2440c	OTHER	0.019984	0.002934	0.054624	0.922458
Rv0481c	OTHER	0.005164	0.00077	0.000558	0.993508
Rv1905c	OTHER	0.322692	0.179361	0.043905	0.454042
Rv0045c	OTHER	0.014282	0.004989	0.001479	0.97925
Rv1941	OTHER	0.17976	0.239922	0.026838	0.55348
Rv2004c	OTHER	0.005745	0.00068	0.001378	0.992196
Rv1940	OTHER	0.093775	0.127132	0.064115	0.714978
Rv2137c	OTHER	0.022924	0.007242	0.034688	0.935146
Rv0612	OTHER	0.005466	0.00297	0.003918	0.987645
Rv3201c	OTHER	0.329535	0.074288	0.018565	0.577611
Rv0614	OTHER	0.113611	0.127441	0.027745	0.731203
Rv1945	OTHER	0.005486	0.012448	0.001584	0.980482
Rv1947	OTHER	0.044991	0.001371	0.001011	0.952627
Rv0615	OTHER	0.016353	0.003316	0.053606	0.926725
Rv0618	OTHER	0.006944	0.003179	0.000818	0.989059
Rv3770c	OTHER	0.004013	0.000131	0.001509	0.994346
Rv0617	OTHER	0.100645	0.007641	0.003366	0.888348
Rv0619	OTHER	0.0088	0.001693	0.002091	0.987416
Rv0040c	SP(Sec/SPI)	0.746865	0.193884	0.048619	0.010632	CS pos: 32-33. ASA-DP. Pr: 0.8223
Rv1902c	OTHER	0.0061	0.000278	0.000922	0.992699
Rv2134c	OTHER	0.002567	0.000757	0.000845	0.995831
Rv2267c	OTHER	0.017558	0.003736	0.242686	0.736021
Rv0681	OTHER	0.004264	0.002173	0.000773	0.99279
Rv0683	OTHER	0.004454	0.000536	0.000445	0.994565
Rv0682	OTHER	0.030598	0.027064	0.007936	0.934401
Rv0685	OTHER	0.00368	0.000263	0.000549	0.995509
Rv0684	OTHER	0.009859	0.000592	0.001382	0.988166
Rv0837c	OTHER	0.017353	0.007075	0.00227	0.973302
Rv3712	OTHER	0.058852	0.283453	0.042885	0.61481
Rv0687	OTHER	0.113367	0.037923	0.032049	0.816661
Rv0686	OTHER	0.003566	0.000377	0.043382	0.952675
Rv3710	OTHER	0.017836	0.019546	0.008972	0.953646
Rv3770A	OTHER	0.014806	0.002179	0.007489	0.975526
Rv0688	OTHER	0.005567	0.003707	0.001274	0.989452
Rv3333c	SP(Sec/SPI)	0.890796	0.069171	0.010983	0.029051	CS pos: 32-33. AAA-DP. Pr: 0.8804
Rv3770B	OTHER	0.019935	0.025099	0.007895	0.947072
Rv3200c	OTHER	0.028243	0.002783	0.01104	0.957934
Rv3713	OTHER	0.009234	0.002043	0.000826	0.987897
Rv3719	OTHER	0.05555	0.069996	0.114731	0.759723
Rv3717	SP(Sec/SPI)	0.909068	0.02931	0.026514	0.035109	CS pos: 19-20. ASA-TP. Pr: 0.3304
Rv1069c	OTHER	0.017309	0.006474	0.016235	0.959982
Rv3599c	OTHER	0.140114	0.079086	0.081611	0.69919
Rv2135c	OTHER	0.015106	0.004578	0.017096	0.96322
Rv2571c	OTHER	0.032591	0.002215	0.012634	0.95256
Rv0670	OTHER	0.033074	0.002211	0.0049	0.959815
Rv0672	OTHER	0.006043	0.000826	0.000537	0.992594
Rv0671	LIPO(Sec/SPII)	0.022146	0.001502	0.974913	0.001439	CS pos: 17-18. FAG-CS. Pr: 0.9766
Rv0674	SP(Sec/SPI)	0.87517	0.040328	0.007728	0.076774	CS pos: 24-25. ATA-SE. Pr: 0.4730
Rv0673	OTHER	0.004024	0.000261	0.000459	0.995256
Rv2268c	OTHER	0.054798	0.064299	0.017412	0.863491
Rv0675	OTHER	0.042547	0.017688	0.005588	0.934177
Rv0678	OTHER	0.012345	0.019544	0.001198	0.966912
Rv3598c	OTHER	0.01937	0.012761	0.003069	0.964799
Rv3029c	OTHER	0.003789	0.000144	0.000496	0.995571
Rv2398c	OTHER	0.001898	0.000202	0.004507	0.993392
Rv0042c	OTHER	0.013317	0.001436	0.001843	0.983404
Rv0663	OTHER	0.031072	0.007654	0.003627	0.957647
Rv0665	OTHER	0.006197	0.003807	0.001089	0.988907
Rv1996	OTHER	0.017859	0.00284	0.007286	0.972015
Rv0664	OTHER	0.078318	0.039773	0.114673	0.767236
Rv1995	LIPO(Sec/SPII)	0.014549	0.434726	0.527992	0.022732	CS pos: 42-43. LSA-CS. Pr: 0.5455
Rv0667	OTHER	0.027627	0.028313	0.001328	0.942732
Rv3597c	OTHER	0.01063	0.001402	0.000985	0.986983
Rv0666	OTHER	0.135942	0.150293	0.028066	0.685698
Rv1997	OTHER	0.011154	0.001146	0.00228	0.985421
Rv3028c	OTHER	0.030829	0.038135	0.002518	0.928519
Rv1067c	SP(Sec/SPI)	0.462918	0.276458	0.027026	0.233599	CS pos: 30-31. ANA-AA. Pr: 0.1145
Rv1370c	OTHER	0.014446	0.008318	0.004296	0.97294
Rv0668	OTHER	0.040549	0.003059	0.006053	0.950339
Rv1900c	OTHER	0.002547	0.000358	0.000815	0.99628
Rv2399c	OTHER	0.008609	0.002337	0.008153	0.980901
Rv2133c	OTHER	0.026265	0.00273	0.011295	0.95971
Rv0650	OTHER	0.127101	0.005437	0.013032	0.85443
Rv0652	OTHER	0.10661	0.295606	0.001093	0.59669
Rv1983	OTHER	0.217835	0.247956	0.0189	0.515309
Rv0651	OTHER	0.014113	0.028194	0.001342	0.956351
Rv0654	OTHER	0.034832	0.003899	0.006249	0.95502
Rv0836c	OTHER	0.009493	0.000795	0.001579	0.988132
Rv1987	SP(Sec/SPI)	0.777837	0.200062	0.00465	0.01745	CS pos: 37-38. ASA-AT. Pr: 0.5153
Rv3027c	OTHER	0.022301	0.013222	0.007361	0.957116
Rv0655	OTHER	0.021596	0.002115	0.001636	0.974654
Rv1986	OTHER	0.163878	0.00546	0.127716	0.702947
Rv1068c	OTHER	0.189721	0.191775	0.015824	0.60268
Rv1988	OTHER	0.016871	0.010595	0.005929	0.966606
Rv3596c	OTHER	0.003836	0.000519	0.000366	0.995279
Rv0355c	OTHER	0.170481	0.095057	0.006687	0.727776
Rv2449c	OTHER	0.019394	0.052548	0.002477	0.925581
Rv2885c	OTHER	0.028508	0.01535	0.002594	0.953548
Rv2752c	OTHER	0.003176	0.000285	0.000838	0.995702
Rv1990c	OTHER	0.012683	0.001957	0.002856	0.982504
Rv1687c	OTHER	0.026196	0.008979	0.003095	0.96173
Rv1991A	OTHER	0.004311	0.001936	0.000601	0.993151
Rv3648c	OTHER	0.005374	0.000658	0.000729	0.993239
Rv0792c	OTHER	0.006234	0.003367	0.001182	0.989218
Rv1118c	OTHER	0.031038	0.00801	0.012134	0.948818
Rv3515c	OTHER	0.007443	0.000271	0.002125	0.990162
Rv0354c	OTHER	0.063866	0.000474	0.004522	0.931139
Rv2886c	OTHER	0.122975	0.197938	0.066947	0.612139
Rv2753c	OTHER	0.346902	0.06283	0.039463	0.550804
Rv2620c	OTHER	0.019342	0.000645	0.006855	0.973159
Rv1991c	OTHER	0.11193	0.039096	0.003897	0.845078
Rv3647c	OTHER	0.044461	0.013516	0.038087	0.903935
Rv1119c	OTHER	0.051498	0.007654	0.011299	0.92955
Rv2883c	OTHER	0.038132	0.013422	0.002855	0.945591
Rv0660c	OTHER	0.007321	0.014159	0.000876	0.977643
Rv0224c	OTHER	0.00715	0.00629	0.001304	0.985256
Rv0357c	OTHER	0.058425	0.000608	0.00492	0.936047
Rv2314c	OTHER	0.008163	0.000958	0.00174	0.98914
Rv2447c	OTHER	0.005562	0.001489	0.000805	0.992144
Rv1685c	OTHER	0.025264	0.021136	0.00429	0.94931
Rv0790c	OTHER	0.004573	0.001045	0.001316	0.993066
Rv3513c	OTHER	0.029374	0.01359	0.013704	0.943332
Rv3646c	OTHER	0.023268	0.011121	0.003409	0.962203
Rv1249c	OTHER	0.024487	0.045387	0.006217	0.923909
Rv2448c	OTHER	0.012831	0.001782	0.003216	0.982171
Rv0223c	OTHER	0.050122	0.009971	0.003809	0.936098
Rv0356c	OTHER	0.003653	0.001955	0.00051	0.993882
Rv2315c	OTHER	0.025894	0.246091	0.003683	0.724332
Rv1990A	OTHER	0.023857	0.006274	0.005973	0.963896
Rv0791c	OTHER	0.048483	0.013203	0.00948	0.928833
Rv1686c	OTHER	0.00894	0.001167	0.010963	0.978931
Rv3778c	OTHER	0.00678	0.037782	0.001079	0.954359
Rv2881c	OTHER	0.022283	0.001022	0.019804	0.956891
Rv0484c	OTHER	0.114471	0.139571	0.01914	0.726818
Rv0048c	OTHER	0.025456	0.002715	0.004691	0.967139
Rv2445c	OTHER	0.016822	0.010481	0.001056	0.971641
Rv2578c	OTHER	0.01687	0.006667	0.001805	0.974658
Rv1932	OTHER	0.020056	0.006306	0.003898	0.969741
Rv0603	SP(Sec/SPI)	0.870074	0.082724	0.023465	0.023737	CS pos: 28-29. AAA-FD. Pr: 0.6359
Rv0605	OTHER	0.030964	0.019692	0.00383	0.945514
Rv1936	OTHER	0.003164	0.000158	0.000464	0.996214
Rv0604	LIPO(Sec/SPII)	0.002318	0.011823	0.985509	0.00035	CS pos: 22-23. LTA-CA. Pr: 0.9851
Rv0607	OTHER	0.0119	0.000423	0.002167	0.98551
Rv1938	OTHER	0.009845	0.000867	0.000767	0.988521
Rv0606	OTHER	0.013343	0.004956	0.001138	0.980563
Rv1937	OTHER	0.075419	0.001917	0.004136	0.918528
Rv0609	OTHER	0.003898	0.000586	0.000806	0.99471
Rv0608	OTHER	0.004388	0.00199	0.000798	0.992824
Rv1247c	OTHER	0.00258	0.000439	0.000265	0.996717
Rv1939	OTHER	0.192286	0.137326	0.019049	0.65134
Rv3644c	OTHER	0.097475	0.233463	0.009953	0.65911
Rv2882c	OTHER	0.005984	0.003862	0.001324	0.988831
Rv0047c	OTHER	0.020378	0.061256	0.002439	0.915928
Rv2313c	OTHER	0.030849	0.026807	0.010604	0.93174
Rv2446c	OTHER	0.008796	0.000655	0.007859	0.98269
Rv1920	OTHER	0.010921	0.003003	0.00266	0.983416
Rv3510c	OTHER	0.008919	0.004561	0.001219	0.985301
Rv1923	OTHER	0.140179	0.027341	0.036988	0.795493
Rv1922	LIPO(Sec/SPII)	0.009597	0.027288	0.962611	0.000504	CS pos: 24-25. LGG-CT. Pr: 0.9633
Rv1925	OTHER	0.004515	0.00059	0.000872	0.994023
Rv1927	OTHER	0.040773	0.008891	0.009154	0.941182
Rv1248c	OTHER	0.005859	0.002583	0.000867	0.990691
Rv3208A	OTHER	0.032515	0.009401	0.000388	0.957697
Rv1116A	OTHER	0.176325	0.186154	0.011714	0.625808
Rv3207c	SP(Sec/SPI)	0.887607	0.022969	0.03923	0.050194	CS pos: 37-38. AAA-QT. Pr: 0.6505
Rv1908c	OTHER	0.048145	0.001644	0.01127	0.938941
Rv2576c	SP(Sec/SPI)	0.734566	0.231058	0.004584	0.029791	CS pos: 45-46. ARA-DP. Pr: 0.7821
Rv2007c	OTHER	0.062966	0.000622	0.005497	0.930915
Rv3642c	OTHER	0.02023	0.011871	0.010648	0.957251
Rv1913	OTHER	0.076869	0.018944	0.002139	0.902048
Rv1916	OTHER	0.021121	0.033895	0.002884	0.942099
Rv1915	OTHER	0.002036	0.001028	0.000299	0.996637
Rv1378c	OTHER	0.022155	0.017208	0.127804	0.832833
Rv1245c	OTHER	0.154506	0.056076	0.014016	0.775402
Rv3339c	OTHER	0.001222	8.2e-05	0.00015	0.998547
Rv3206c	OTHER	0.031613	0.014822	0.007511	0.946054
Rv1909c	OTHER	0.010866	0.001137	0.001394	0.986603
Rv2880c	OTHER	0.009329	0.002784	0.003025	0.984861
Rv2008c	OTHER	0.019345	0.005835	0.007994	0.966826
Rv2444c	OTHER	0.008161	0.060411	0.001133	0.930295
Rv1901	OTHER	0.006163	0.00046	0.005408	0.987969
Rv3641c	OTHER	0.008742	0.001153	0.001367	0.988739
Rv1903	OTHER	0.025816	0.001456	0.011875	0.960853
Rv1904	OTHER	0.088067	0.011908	0.011374	0.88865
Rv1246c	OTHER	0.00929	0.002407	0.009824	0.97848
Rv3205c	OTHER	0.056989	0.010295	0.01296	0.919756
Rv2097c	OTHER	0.011315	0.002723	0.005826	0.980136
Rv1050	OTHER	0.061088	0.385117	0.007609	0.546186
Rv2384	OTHER	0.025383	0.014889	0.00486	0.954869
Rv1052	OTHER	0.054596	0.023161	0.059269	0.862973
Rv1055	OTHER	0.061644	0.040695	0.046599	0.851062
Rv1054	OTHER	0.01016	0.001205	0.001198	0.987437
Rv2385	OTHER	0.219407	0.326666	0.00946	0.444467
Rv1057	OTHER	0.051331	0.060397	0.00382	0.884451
Rv0400c	OTHER	0.007446	0.001432	0.000634	0.990488
Rv0533c	OTHER	0.028875	0.005761	0.0095	0.955864
Rv1056	OTHER	0.012806	0.001396	0.006424	0.979374
Rv2387	OTHER	0.002817	0.000214	0.001147	0.995823
Rv2627c	OTHER	0.013274	0.012269	0.003311	0.971145
Rv1059	OTHER	0.108848	0.009157	0.025187	0.856807
Rv1058	OTHER	0.02879	0.009635	0.087958	0.873617
Rv3163c	OTHER	0.113325	0.10534	0.126534	0.654802
Rv1732c	OTHER	0.145913	0.06291	0.010531	0.780647
Rv1865c	OTHER	0.157909	0.086841	0.012637	0.742613
Rv1998c	OTHER	0.045221	0.018384	0.004401	0.931994
Rv2371	OTHER	0.125362	0.028289	0.019602	0.826747
Rv2098c	TAT(Tat/SPI)	0.133153	0.445523	0.004436	0.416888	CS pos: 37-38. ANA-QQ. Pr: 0.3994
Rv3161c	OTHER	0.002869	0.000494	0.000546	0.996092
Rv1044	OTHER	0.012861	0.001132	0.001881	0.984126
Rv2375	OTHER	0.00461	0.000301	0.000741	0.994348
Rv1045	OTHER	0.017044	0.005227	0.002242	0.975487
Rv0229c	SP(Sec/SPI)	0.44208	0.163029	0.031984	0.362908	CS pos: 29-30. IHG-ET. Pr: 0.3563
Rv1047	OTHER	0.098961	0.200791	0.00442	0.695828
Rv1049	OTHER	0.029954	0.012266	0.003259	0.954522
Rv0971c	OTHER	0.061666	0.050649	0.004884	0.882802
Rv3162c	OTHER	0.035355	0.00286	0.050312	0.911473
Rv3825c	OTHER	0.036264	0.009586	0.115673	0.838477
Rv1733c	OTHER	0.109916	0.043081	0.01056	0.836443
Rv1999c	TAT(Tat/SPI)	0.086801	0.501238	0.009547	0.402414	CS pos: 46-47. AYA-AG. Pr: 0.4330
Rv3692	OTHER	0.076509	0.032972	0.00571	0.88481
Rv3693	OTHER	0.260655	0.082717	0.021959	0.634669
Rv1031	OTHER	0.467804	0.009538	0.035605	0.487053
Rv2095c	OTHER	0.136779	0.039714	0.002177	0.82133
Rv3160c	OTHER	0.098326	0.063585	0.04177	0.796319
Rv3690	OTHER	0.010617	0.000444	0.019683	0.969256
Rv1030	OTHER	0.012952	0.030447	0.015338	0.941263
Rv3691	OTHER	0.04208	0.008784	0.004902	0.944235
Rv2363	OTHER	0.008231	0.002031	0.002868	0.98687
Rv2625c	OTHER	0.004228	0.000355	0.008451	0.986965
Rv3695	OTHER	0.004138	8.6e-05	0.002432	0.993343
Rv0402c	OTHER	0.26051	0.005499	0.021713	0.712278
Rv2758c	OTHER	0.025676	0.004313	0.002977	0.967034
Rv3698	OTHER	0.006961	0.000841	0.002514	0.989683
Rv3699	OTHER	0.013853	0.001329	0.000685	0.984133
Rv0798c	OTHER	0.013327	0.004706	0.001834	0.980133
Rv3294c	OTHER	0.011281	0.011066	0.005594	0.972059
Rv1730c	OTHER	0.040379	0.004001	0.060167	0.895453
Rv3824c	OTHER	0.098392	0.053839	0.022011	0.825758
Rv2094c	SP(Sec/SPI)	0.419649	0.009545	0.250486	0.32032	CS pos: 31-32. ARS-LG. Pr: 0.1776
Rv1863c	OTHER	0.003113	0.000137	0.000802	0.995948
Rv1427c	OTHER	0.029466	0.153773	0.007601	0.80916
Rv3682	SP(Sec/SPI)	0.419173	0.088317	0.292943	0.199568	CS pos: 27-28. ATA-LT. Pr: 0.1425
Rv1020	OTHER	0.029781	0.015441	0.003558	0.95122
Rv2096c	OTHER	0.133987	0.020616	0.014215	0.831183
Rv3680	OTHER	0.085463	0.051639	0.019684	0.843215
Rv1022	LIPO(Sec/SPII)	0.005928	0.00465	0.982727	0.006695	CS pos: 23-24. ASS-CT. Pr: 0.9772
Rv1021	OTHER	0.014166	0.007369	0.001449	0.977017
Rv1024	OTHER	0.041948	0.068409	0.010423	0.87922
Rv2355	OTHER	0.013323	0.001265	0.004533	0.980878
Rv2626c	OTHER	0.018705	0.005025	0.002056	0.974214
Rv3683	OTHER	0.231242	0.084217	0.026293	0.658248
Rv1023	OTHER	0.011705	0.005567	0.001232	0.981496
Rv2354	OTHER	0.014446	0.008318	0.004296	0.97294
Rv3684	OTHER	0.010488	0.000658	0.00534	0.983515
Rv0534c	OTHER	0.044536	0.004068	0.021619	0.929777
Rv1026	OTHER	0.00841	0.001787	0.00151	0.988293
Rv2759c	OTHER	0.009987	0.000683	0.003588	0.985742
Rv3689	OTHER	0.074503	0.095615	0.010601	0.819281
Rv1025	OTHER	0.036935	0.011409	0.043674	0.907982
Rv2359	OTHER	0.015079	0.030242	0.000788	0.953891
Rv2358	OTHER	0.019744	0.00299	0.00281	0.974456
Rv1029	SP(Sec/SPI)	0.777477	0.020497	0.035013	0.167013	CS pos: 24-25. ALG-GY. Pr: 0.4194
Rv0799c	SP(Sec/SPI)	0.482975	0.010654	0.084698	0.421673	CS pos: 28-29. IGA-DG. Pr: 0.1725
Rv3823c	OTHER	0.053866	0.004989	0.010659	0.930486
Rv1864c	OTHER	0.159855	0.038928	0.01129	0.789926
Rv1428c	OTHER	0.004849	0.002641	0.000518	0.991991
Rv1091	OTHER	0.28238	0.105791	0.015469	0.59636
Rv1090	OTHER	0.083844	0.001151	0.00442	0.910585
Rv1093	OTHER	0.007522	0.008612	0.000499	0.983366
Rv1095	OTHER	0.002614	0.000163	0.006923	0.9903
Rv1094	OTHER	0.017013	0.000404	0.000795	0.981788
Rv1096	SP(Sec/SPI)	0.765968	0.116321	0.041112	0.076599	CS pos: 38-39. TRA-EN. Pr: 0.7948
Rv0662c	OTHER	0.006337	0.002614	0.00182	0.98923
Rv0530A	SP(Sec/SPI)	0.717499	0.060002	0.020372	0.202127	CS pos: 23-24. ARA-QM. Pr: 0.7093
Rv3291c	OTHER	0.010719	0.034335	0.002728	0.952218
Rv0226c	SP(Sec/SPI)	0.509189	0.043989	0.078249	0.368573	CS pos: 31-32. RDA-VS. Pr: 0.0431
Rv2889c	OTHER	0.090067	0.026676	0.087221	0.796037
Rv2756c	OTHER	0.0052	0.000592	0.000568	0.993639
Rv1994c	OTHER	0.076808	0.014804	0.012166	0.896222
Rv2092c	OTHER	0.102317	0.037431	0.004845	0.855407
Rv1082	OTHER	0.005879	0.000933	0.001842	0.991346
Rv1084	OTHER	0.059001	0.00577	0.008814	0.926415
Rv1083	OTHER	0.010067	0.00033	0.006773	0.982829
Rv1086	OTHER	0.010638	0.001725	0.002146	0.985491
Rv0661c	OTHER	0.009177	0.001093	0.004278	0.985453
Rv1088	OTHER	0.36446	0.038285	0.031413	0.565843
Rv2624c	OTHER	0.03455	0.009376	0.003951	0.952123
Rv1087	OTHER	0.395595	0.157447	0.022845	0.424113
Rv1089	OTHER	0.254967	0.181346	0.051305	0.512382
Rv3290c	OTHER	0.0179	0.000773	0.001477	0.979849
Rv2757c	OTHER	0.006246	0.001545	0.002565	0.989644
Rv2093c	OTHER	0.002678	0.000304	0.001622	0.995396
Rv3518c	OTHER	0.011423	0.004439	0.001151	0.982987
Rv1426c	OTHER	0.058903	0.039703	0.031436	0.869958
Rv1073	OTHER	0.014577	0.001288	0.00172	0.982416
Rv1072	OTHER	0.046825	0.010386	0.006935	0.935853
Rv1077	OTHER	0.029719	0.005833	0.00271	0.961739
Rv1076	OTHER	0.084249	0.058432	0.007422	0.849898
Rv2754c	OTHER	0.019174	0.001629	0.001534	0.977663
Rv1079	OTHER	0.054097	0.017348	0.01131	0.917245
Rv1078	OTHER	0.161543	0.261995	0.093038	0.483424
Rv2621c	OTHER	0.085795	0.273073	0.029516	0.611616
Rv0794c	OTHER	0.028875	0.006246	0.006584	0.958295
Rv1992c	OTHER	0.014616	0.002996	0.002351	0.980036
Rv3820c	OTHER	0.058825	0.017349	0.007556	0.916269
Rv1060	OTHER	0.021882	0.005192	0.003521	0.969404
Rv2391	OTHER	0.01979	0.002152	0.004549	0.973509
Rv1062	TAT(Tat/SPI)	0.125562	0.766607	0.014281	0.09355	CS pos: 28-29. GIA-DE. Pr: 0.3849
Rv2393	OTHER	0.039758	0.034211	0.006771	0.91926
Rv1061	OTHER	0.182125	0.018733	0.068353	0.730788
Rv2392	OTHER	0.086955	0.007141	0.002625	0.903279
Rv2395	OTHER	0.040516	0.008964	0.018339	0.93218
Rv2394	LIPO(Sec/SPII)	0.008799	0.000429	0.990486	0.000286	CS pos: 20-21. LSG-CG. Pr: 0.9906
Rv1066	OTHER	0.008995	0.003877	0.002643	0.984486
Rv2755c	OTHER	0.049476	0.030351	0.002792	0.917381
Rv1065	OTHER	0.077312	0.01956	0.008523	0.894605
Rv2396	SP(Sec/SPI)	0.625797	0.220045	0.020805	0.133352	CS pos: 32-33. AVA-AA. Pr: 0.2556
Rv2319c	OTHER	0.018693	0.00156	0.002879	0.976868
Rv0227c	SP(Sec/SPI)	0.611897	0.009293	0.166435	0.212374	CS pos: 32-33. RIA-EI. Pr: 0.2836
Rv2888c	OTHER	0.010385	0.0047	0.001241	0.983675
Rv1424c	OTHER	0.12567	0.085155	0.182388	0.606787
Rv1993c	OTHER	0.159107	0.26765	0.035578	0.537665
Rv2091c	OTHER	0.135242	0.025672	0.029442	0.809644
Rv2057c	OTHER	0.013585	0.020229	0.01045	0.955737
Rv3919c	OTHER	0.009063	0.012261	0.002452	0.976224
Rv1958c	OTHER	0.021341	0.070003	0.034157	0.874499
Rv2360c	OTHER	0.002206	0.000235	0.000354	0.997205
Rv3872	OTHER	0.13712	0.253727	0.004382	0.604771
Rv3873	TAT(Tat/SPI)	0.357213	0.486529	0.021528	0.13473	CS pos: 42-43. AQA-VE. Pr: 0.3825
Rv1211	OTHER	0.008183	0.001525	0.003093	0.987198
Rv2542	OTHER	0.010342	0.015849	0.002843	0.970966
Rv3870	OTHER	0.018447	0.002758	0.001961	0.976834
Rv1210	OTHER	0.00639	0.000645	0.004442	0.988522
Rv2541	OTHER	0.134754	0.042228	0.01518	0.807837
Rv3871	OTHER	0.002617	0.001436	0.000725	0.995222
Rv1213	OTHER	0.018732	0.001318	0.010393	0.969557
Rv2544	LIPO(Sec/SPII)	0.003618	0.004236	0.98938	0.002766	CS pos: 32-33. IGG-CT. Pr: 0.9898
Rv3876	OTHER	0.047392	0.062104	0.007112	0.883392
Rv2543	LIPO(Sec/SPII)	0.002542	0.00306	0.991327	0.003071	CS pos: 32-33. IGG-CT. Pr: 0.9921
Rv3877	OTHER	0.169612	0.088033	0.047161	0.695194
Rv2546	OTHER	0.010973	0.001894	0.001625	0.985508
Rv3874	OTHER	0.007922	0.017992	0.000642	0.973445
Rv2545	OTHER	0.010584	0.003743	0.006688	0.978985
Rv3875	OTHER	0.038689	0.038776	0.003063	0.919471
Rv2548	OTHER	0.004647	0.000202	0.000311	0.99484
Rv3389c	OTHER	0.055175	0.062638	0.001313	0.880874
Rv2547	OTHER	0.01155	0.019965	0.002565	0.965921
Rv3256c	OTHER	0.045241	0.256168	0.003425	0.695166
Rv3878	OTHER	0.115575	0.070423	0.030462	0.783539
Rv0095c	OTHER	0.13671	0.018976	0.072331	0.771983
Rv2058c	OTHER	0.02294	0.021427	0.00358	0.952053
Rv1959c	OTHER	0.012041	0.001812	0.002717	0.98343
Rv2361c	OTHER	0.037904	0.019878	0.004205	0.938013
Rv3918c	OTHER	0.159221	0.056491	0.046912	0.737376
Rv3861	OTHER	0.025234	0.074244	0.019431	0.881092
Rv1200	OTHER	0.097907	0.001735	0.020404	0.879955
Rv3860	OTHER	0.116943	0.209192	0.058719	0.615146
Rv1202	OTHER	0.006217	0.001223	0.000812	0.991748
Rv3865	OTHER	0.075426	0.009168	0.029617	0.885789
Rv3866	OTHER	0.006361	0.000303	0.001021	0.992315
Rv3863	OTHER	0.092871	0.086122	0.166648	0.654358
Rv0625c	OTHER	0.118163	0.080262	0.016734	0.784841
Rv3864	OTHER	0.080537	0.004065	0.060441	0.854957
Rv1206	OTHER	0.034868	0.010442	0.00257	0.95212
Rv3869	OTHER	0.006747	0.00019	0.008781	0.984282
Rv1205	OTHER	0.158134	0.055122	0.011253	0.775491
Rv2536	OTHER	0.011469	0.000598	0.004949	0.982985
Rv1208	OTHER	0.008594	0.000943	0.00233	0.988133
Rv3255c	OTHER	0.071773	0.012767	0.009514	0.905947
Rv3867	OTHER	0.00588	0.001586	0.001324	0.99121
Rv0931c	OTHER	0.003821	0.001013	0.001172	0.993994
Rv1207	OTHER	0.204736	0.090907	0.037595	0.666762
Rv3868	OTHER	0.126024	0.040791	0.005022	0.828162
Rv1209	OTHER	0.324724	0.00905	0.2222	0.444026
Rv2055c	OTHER	0.00388	0.002454	0.000673	0.992994
Rv2188c	OTHER	0.031741	0.061837	0.001888	0.904534
Rv3917c	OTHER	0.144164	0.403609	0.025212	0.427015
Rv3850	OTHER	0.015538	0.007093	0.003777	0.973592
Rv3851	SP(Sec/SPI)	0.76032	0.1873	0.012093	0.040286	CS pos: 47-48. AFA-HT. Pr: 0.6332
Rv2521	OTHER	0.06129	0.005194	0.012041	0.921475
Rv3855	OTHER	0.034138	0.005222	0.009082	0.951558
Rv3852	OTHER	0.044374	0.111293	0.012871	0.831461
Rv3853	OTHER	0.014286	0.014022	0.001248	0.970444
Rv2526	OTHER	0.007705	0.012261	0.00187	0.978164
Rv2718c	OTHER	0.017343	0.027858	0.010016	0.944783
Rv0628c	OTHER	0.065696	0.026945	0.011874	0.895485
Rv2527	OTHER	0.011359	0.000937	0.001383	0.986321
Rv2529	OTHER	0.085032	0.179884	0.021005	0.714079
Rv2490c	OTHER	0.323255	0.183195	0.015556	0.477994
Rv2189c	OTHER	0.010214	0.033484	0.001712	0.95459
Rv2056c	OTHER	0.036518	0.066046	0.011527	0.885908
Rv3916c	OTHER	0.007276	0.000318	0.000464	0.991943
Rv3840	OTHER	0.015532	0.001322	0.002531	0.980616
Rv2511	OTHER	0.001962	0.000215	0.000267	0.997557
Rv3844	OTHER	0.024686	0.097865	0.1754	0.702049
Rv0759c	OTHER	0.004424	0.000734	0.000672	0.994169
Rv2513	OTHER	0.01801	0.00774	0.004239	0.970012
Rv3841	OTHER	0.001049	0.000108	0.000143	0.9987
Rv2719c	OTHER	0.062313	0.11075	0.012567	0.81437
Rv3847	OTHER	0.051586	0.026732	0.0072	0.914482
Rv3848	OTHER	0.03779	0.003129	0.014103	0.944977
Rv3845	OTHER	0.021114	0.028188	0.006944	0.943753
Rv3846	OTHER	0.003149	0.000365	0.000697	0.995789
Rv2519	SP(Sec/SPI)	0.382617	0.310362	0.020244	0.286777	CS pos: 33-34. AAA-AP. Pr: 0.1731
Rv3253c	OTHER	0.037148	0.012888	0.0053	0.944664
Rv3849	OTHER	0.013003	0.005327	0.001744	0.979926
Rv2053c	OTHER	0.003479	0.002657	0.009234	0.98463
Rv2186c	OTHER	0.008801	0.001863	0.001872	0.987464
Rv2582	OTHER	0.04759	0.014236	0.061756	0.876418
Rv1250	OTHER	0.124017	0.003168	0.00754	0.865275
Rv1253	OTHER	0.030975	0.004886	0.00242	0.96172
Rv1254	OTHER	0.201702	0.032679	0.015776	0.749843
Rv1290c	OTHER	0.081269	0.082252	0.038795	0.797684
Rv1259	OTHER	0.029582	0.006135	0.00963	0.954652
Rv2589	TAT(Tat/SPI)	0.151002	0.514337	0.004419	0.330242	CS pos: 45-46. ARA-GG. Pr: 0.5537
Rv0889c	OTHER	0.006594	0.000568	0.000857	0.991981
Rv0756c	OTHER	0.321622	0.041355	0.0229	0.614122
Rv2849c	OTHER	0.03274	0.01377	0.002084	0.951405
Rv3385c	OTHER	0.033972	0.009264	0.004652	0.952112
Rv3252c	OTHER	0.004844	0.004166	0.002178	0.988812
Rv1954c	OTHER	0.119246	0.029413	0.099421	0.75192
Rv1240	OTHER	0.046779	0.012243	0.011603	0.929375
Rv2570	OTHER	0.006778	0.001134	0.003022	0.989066
Rv1242	OTHER	0.102204	0.051951	0.005173	0.840672
Rv2573	OTHER	0.01478	0.002342	0.003682	0.979196
Rv1241	OTHER	0.005872	0.001041	0.001137	0.99195
Rv1244	LIPO(Sec/SPII)	0.011673	0.000369	0.98765	0.000308	CS pos: 22-23. VAG-CS. Pr: 0.9884
Rv2575	OTHER	0.22061	0.082613	0.052655	0.644123
Rv2574	OTHER	0.005463	0.000541	0.000605	0.993391
Rv1291c	TAT(Tat/SPI)	0.27326	0.709799	0.012825	0.004116	CS pos: 33-34. ASA-SS. Pr: 0.8053
Rv2577	TAT(Tat/SPI)	0.000634	0.997916	0.000429	0.00102	CS pos: 52-53. GPA-VW. Pr: 0.4815
Rv2579	OTHER	0.022614	0.000281	0.002173	0.974931
Rv0318c	OTHER	0.107686	0.141427	0.006369	0.744518
Rv2717c	OTHER	0.209847	0.080995	0.198686	0.510472
Rv3384c	OTHER	0.003315	0.005304	0.000545	0.990836
Rv3251c	OTHER	0.099732	0.001616	0.011294	0.887357
Rv0094c	OTHER	0.011821	0.003298	0.003119	0.981762
Rv2051c	OTHER	0.024285	0.003818	0.025322	0.946575
Rv2560	OTHER	0.217828	0.13734	0.162643	0.482189
Rv2184c	OTHER	0.010656	0.001031	0.004265	0.984049
Rv2562	OTHER	0.003339	0.00021	0.000271	0.99618
Rv2561	OTHER	0.019997	0.00256	0.000762	0.97668
Rv2564	OTHER	0.062586	0.001629	0.015589	0.920196
Rv2563	OTHER	0.247661	0.021523	0.021728	0.709089
Rv1235	LIPO(Sec/SPII)	0.04621	0.00182	0.950004	0.001967	CS pos: 25-26. AAA-CG. Pr: 0.9510
Rv2566	OTHER	0.023628	0.02978	0.010853	0.93574
Rv2847c	OTHER	0.202644	0.057684	0.021671	0.718001
Rv1234	OTHER	0.131569	0.14165	0.032852	0.693929
Rv2565	OTHER	0.007457	0.001088	0.003308	0.988147
Rv1237	OTHER	0.08135	0.005779	0.018916	0.893955
Rv1236	OTHER	0.074585	0.049324	0.013235	0.862856
Rv2567	OTHER	0.036457	0.001986	0.003306	0.958251
Rv0755A	OTHER	0.025802	0.003373	0.002349	0.968476
Rv1238	OTHER	0.008994	0.00213	0.002081	0.986795
Rv0887c	OTHER	0.006171	0.000293	0.000572	0.992964
Rv1290A	OTHER	0.073188	0.013645	0.01615	0.897017
Rv3383c	OTHER	0.054981	0.037173	0.006018	0.901828
Rv3250c	OTHER	0.027894	0.001173	0.006508	0.964425
Rv1516c	OTHER	0.024046	0.001587	0.001707	0.97266
Rv0093c	OTHER	0.069171	0.028789	0.252067	0.649973
Rv2185c	OTHER	0.003978	0.000124	0.000646	0.995252
Rv2052c	OTHER	0.014902	0.0012	0.001249	0.982649
Rv3609c	OTHER	0.005819	0.001304	0.001151	0.991727
Rv3381c	OTHER	0.014446	0.008318	0.004296	0.97294
Rv1222	OTHER	0.017767	0.021317	0.005961	0.954955
Rv1221	OTHER	0.027052	0.000727	0.00489	0.967331
Rv1224	OTHER	0.315704	0.024358	0.020485	0.639452
Rv1223	OTHER	0.031796	0.020374	0.006939	0.940891
Rv2557	OTHER	0.060709	0.003691	0.009115	0.926485
Rv1228	LIPO(Sec/SPII)	0.001333	0.000211	0.998181	0.000275	CS pos: 19-20. TAA-CS. Pr: 0.9985
Rv2558	OTHER	0.086533	0.134321	0.014162	0.764984
Rv0755c	OTHER	0.183017	0.209708	0.014468	0.592806
Rv2848c	OTHER	0.236801	0.038538	0.070712	0.653949
Rv3382c	OTHER	0.01188	0.002595	0.003851	0.981674
Rv3079c	OTHER	0.014975	0.001701	0.001538	0.981786
Rv1954A	OTHER	0.087105	0.035457	0.041981	0.835458
Rv0141c	OTHER	0.006228	0.000439	0.002814	0.99052
Rv2368c	OTHER	0.014542	0.003234	0.004311	0.977912
Rv3301c	OTHER	0.026251	0.006718	0.003382	0.963648
Rv0768	OTHER	0.019121	0.002146	0.005274	0.973459
Rv0769	OTHER	0.186589	0.03749	0.014091	0.76183
Rv1037c	OTHER	0.040878	0.00528	0.004918	0.948924
Rv3434c	OTHER	0.008308	0.0005	0.002423	0.98877
Rv3567c	OTHER	0.072036	0.02219	0.011064	0.89471
Rv0273c	OTHER	0.103121	0.125773	0.010572	0.760534
Rv2237A	OTHER	0.042362	0.021274	0.013435	0.922929
Rv0806c	OTHER	0.004062	0.001423	0.001344	0.993171
Rv2236c	OTHER	0.115607	0.00544	0.233432	0.645521
Rv0750	OTHER	0.066584	0.003682	0.010091	0.919642
Rv2103c	OTHER	0.006966	0.000748	0.001549	0.990737
Rv2369c	OTHER	0.038901	0.067382	0.018179	0.875538
Rv0754	OTHER	0.239804	0.25204	0.01721	0.490945
Rv3300c	OTHER	0.065414	0.167454	0.004476	0.762656
Rv3433c	OTHER	0.050367	0.034877	0.004277	0.910479
Rv0757	OTHER	0.008629	0.001348	0.000654	0.989369
Rv1474c	OTHER	0.005055	0.004	0.001991	0.988953
Rv0758	OTHER	0.282593	0.036082	0.128095	0.553229
Rv1038c	OTHER	0.054863	0.106537	0.003447	0.835153
Rv3566c	OTHER	0.002125	0.000207	0.000265	0.997403
Rv2366c	SP(Sec/SPI)	0.606758	0.047333	0.075596	0.270313	CS pos: 25-26. IDA-AI. Pr: 0.2292
Rv0143c	OTHER	0.01146	0.00054	0.014217	0.973783
Rv0010c	OTHER	0.055662	0.045463	0.142623	0.756252
Rv0277A	OTHER	0.068191	0.133566	0.011319	0.786924
Rv0740	OTHER	0.023637	0.000871	0.002006	0.973485
Rv2499c	OTHER	0.00711	0.001209	0.002082	0.9896
Rv0742	SP(Sec/SPI)	0.444112	0.160035	0.023911	0.371942	CS pos: 33-34. AAA-AN. Pr: 0.1026
Rv0741	OTHER	0.013058	0.003891	0.00154	0.981511
Rv3432c	OTHER	0.029017	0.023221	0.006088	0.941674
Rv0746	OTHER	0.382908	0.152465	0.025834	0.438794
Rv0745	OTHER	0.147535	0.042574	0.017137	0.792754
Rv1035c	OTHER	0.02011	0.014174	0.005475	0.960241
Rv0748	OTHER	0.054621	0.084805	0.007038	0.853536
Rv0747	SP(Sec/SPI)	0.491968	0.162981	0.022498	0.322553	CS pos: 30-31. ANA-AA. Pr: 0.1970
Rv0749	OTHER	0.004737	0.000439	0.001442	0.993382
Rv1168c	OTHER	0.031147	0.016123	0.00167	0.95106
Rv3566A	TAT(Tat/SPI)	0.196172	0.746785	0.00808	0.048963	CS pos: 32-33. AVA-AD. Pr: 0.4887
Rv2670c	OTHER	0.022738	0.01941	0.119988	0.837864
Rv0275c	OTHER	0.009702	0.010457	0.003179	0.976662
Rv0937c	SP(Sec/SPI)	0.872894	0.011783	0.009969	0.105355	CS pos: 22-23. VYS-AT. Pr: 0.4011
Rv2367c	OTHER	0.002642	0.000518	0.000258	0.996583
Rv0730	OTHER	0.012417	0.005327	0.002157	0.980099
Rv0733	OTHER	0.007371	0.000547	0.000943	0.99114
Rv0732	SP(Sec/SPI)	0.457463	0.073891	0.026489	0.442158	CS pos: 32-33. VGA-AL. Pr: 0.1440
Rv0735	OTHER	0.015055	0.001805	0.001132	0.982008
Rv3128c	OTHER	0.012493	0.001146	0.002034	0.984327
Rv3697c	OTHER	0.006349	0.001137	0.001074	0.99144
Rv0734	TAT(Tat/SPI)	0.145003	0.525417	0.011625	0.317955	CS pos: 42-43. AAA-AP. Pr: 0.4128
Rv3431c	OTHER	0.015479	0.004056	0.004004	0.976461
Rv0737	OTHER	0.008426	0.009563	0.005559	0.976453
Rv0736	OTHER	0.014202	0.005784	0.001113	0.978901
Rv1473A	OTHER	0.047852	0.090896	0.018064	0.843188
Rv0739	OTHER	0.012875	0.009064	0.001934	0.976126
Rv0738	OTHER	0.036835	0.004105	0.007143	0.951917
Rv1036c	OTHER	0.00239	0.000135	0.000332	0.997144
Rv1169c	OTHER	0.005997	0.000663	0.001177	0.992163
Rv2364c	OTHER	0.018652	0.041876	0.006904	0.932568
Rv2231c	OTHER	0.109651	0.020461	0.022116	0.847771
Rv2497c	OTHER	0.004185	0.000865	0.001229	0.993722
Rv3833	OTHER	0.083047	0.115118	0.012843	0.788991
Rv3831	OTHER	0.283271	0.008491	0.089358	0.61888
Rv3836	OTHER	0.002903	0.000306	0.00036	0.996431
Rv1033c	OTHER	0.004871	0.000467	0.000901	0.993761
Rv2506	OTHER	0.03169	0.062647	0.001555	0.904108
Rv3430c	OTHER	0.042949	0.047683	0.163026	0.746342
Rv3696c	OTHER	0.003219	0.000801	0.000647	0.995332
Rv3835	OTHER	0.041501	0.257244	0.017089	0.684166
Rv2507	OTHER	0.335494	0.245684	0.051465	0.367357
Rv2509	OTHER	0.011555	0.011366	0.002592	0.974487
Rv3839	OTHER	0.027374	0.011877	0.025351	0.935397
Rv3697A	OTHER	0.062818	0.079217	0.005505	0.85246
Rv2365c	OTHER	0.053882	0.052823	0.005088	0.888208
Rv2498c	OTHER	0.059257	0.011315	0.003791	0.925636
Rv0793	OTHER	0.043734	0.019188	0.003104	0.933974
Rv0795	OTHER	0.014446	0.008318	0.004296	0.97294
Rv3821	OTHER	0.028767	0.001262	0.015346	0.954626
Rv3822	OTHER	0.075734	0.024337	0.025207	0.874723
Rv0797	OTHER	0.005653	0.001123	0.001344	0.99188
Rv0796	OTHER	0.013323	0.001265	0.004533	0.980878
Rv0802c	OTHER	0.00379	0.000145	0.000446	0.99562
Rv3126c	OTHER	0.020044	0.006029	0.006917	0.96701
Rv3826	OTHER	0.006769	0.000753	0.00089	0.991588
Rv1034c	OTHER	0.010907	0.002178	0.004209	0.982706
Rv0629c	OTHER	0.020874	0.001206	0.001112	0.976808
Rv1167c	OTHER	0.025202	0.027666	0.00331	0.943823
Rv2495c	OTHER	0.026954	0.000894	0.004257	0.967895
Rv0272c	OTHER	0.033218	0.084371	0.00919	0.873221
Rv2362c	OTHER	0.003558	0.001828	0.000895	0.993718
Rv0780	OTHER	0.004433	0.000479	0.000891	0.994197
Rv0782	OTHER	0.039525	0.001849	0.004669	0.953957
Rv0781	OTHER	0.005723	0.000416	0.001065	0.992797
Rv0784	OTHER	0.004954	0.000483	0.002225	0.992339
Rv3810	LIPO(Sec/SPII)	0.099306	0.407352	0.428807	0.064535	CS pos: 24-25. ASP-CA. Pr: 0.4082
Rv3811	OTHER	0.10456	0.008497	0.018794	0.868149
Rv0785	OTHER	0.029426	0.011449	0.119768	0.839358
Rv0788	OTHER	0.024556	0.001595	0.001434	0.972414
Rv0932c	LIPO(Sec/SPII)	0.003471	0.000651	0.995567	0.000311	CS pos: 22-23. LTA-CG. Pr: 0.9956
Rv0787	OTHER	0.009821	0.003743	0.003144	0.983292
Rv3694c	OTHER	0.003362	0.001954	0.000419	0.994264
Rv3812	OTHER	0.267938	0.174723	0.018974	0.538365
Rv3818	OTHER	0.156976	0.010206	0.041345	0.791473
Rv3819	OTHER	0.002119	0.00238	0.000713	0.994788
Rv3817	OTHER	0.053886	0.010184	0.010934	0.924996
Rv3125c	OTHER	0.259707	0.352048	0.011683	0.376562
Rv3258c	OTHER	0.156739	0.010969	0.056008	0.776284
Rv2231B	OTHER	0.015738	0.002392	0.002992	0.978878
Rv2496c	OTHER	0.005513	0.001962	0.000584	0.991941
Rv0271c	OTHER	0.0152	0.001698	0.001592	0.98151
Rv2231A	OTHER	0.064801	0.007004	0.110967	0.817228
Rv2230c	OTHER	0.009517	0.000606	0.001584	0.988293
Rv0771	OTHER	0.003009	0.001063	0.000331	0.995596
Rv0770	OTHER	0.012994	0.00262	0.000983	0.983403
Rv0772	OTHER	0.037645	0.004064	0.005973	0.952317
Rv0775	OTHER	0.020917	0.206227	0.007872	0.764983
Rv0777	OTHER	0.013406	0.013351	0.000933	0.97231
Rv1032c	OTHER	0.080864	0.003981	0.011185	0.90397
Rv3257c	OTHER	0.003549	0.000496	0.000365	0.995589
Rv0778	OTHER	0.009333	0.000565	0.001042	0.989059
Rv3560c	OTHER	0.022242	0.060658	0.002909	0.914191
Rv2982c	SP(Sec/SPI)	0.636659	0.045693	0.026778	0.290869	CS pos: 25-26. VLA-DA. Pr: 0.4277
Rv0585c	OTHER	0.029138	0.004384	0.007953	0.958526
Rv0016c	SP(Sec/SPI)	0.891379	0.008438	0.047784	0.052399	CS pos: 30-31. VFT-AD. Pr: 0.6251
Rv2413c	OTHER	0.007397	0.001237	0.001091	0.990274
Rv1651c	OTHER	0.222834	0.26141	0.024548	0.491209
Rv1215c	OTHER	0.013209	0.002217	0.003242	0.981332
Rv3309c	OTHER	0.00803	0.00323	0.001542	0.987198
Rv3745c	OTHER	0.017241	0.000597	0.002019	0.980143
Rv3612c	OTHER	0.11637	0.054192	0.009709	0.819729
Rv3080c	OTHER	0.003364	0.002514	0.000509	0.993613
Rv2850c	OTHER	0.0997	0.01967	0.028554	0.852076
Rv0451c	SP(Sec/SPI)	0.504802	0.004202	0.083542	0.407454	CS pos: 27-28. IRG-FF. Pr: 0.1509
Rv0015c	OTHER	0.011201	0.003117	0.002766	0.982916
Rv2548A	OTHER	0.00505	0.002108	0.000863	0.991978
Rv2414c	OTHER	0.024022	0.024575	0.047482	0.903921
Rv1785c	OTHER	0.00385	0.000553	0.001315	0.994282
Rv0890c	OTHER	0.112821	0.026774	0.014366	0.846038
Rv1216c	OTHER	0.042759	0.00396	0.044095	0.909185
Rv2677c	OTHER	0.035107	0.006938	0.012401	0.945554
Rv2411c	OTHER	0.023109	0.003458	0.002613	0.97082
Rv0018c	OTHER	0.014053	0.003618	0.001253	0.981076
Rv3743c	OTHER	0.046968	0.017969	0.046529	0.888534
Rv3610c	OTHER	0.4644	0.00195	0.064615	0.469036
Rv2981c	OTHER	0.03656	0.025704	0.027415	0.91032
Rv2109c	OTHER	0.10358	0.13645	0.014881	0.745089
Rv2678c	OTHER	0.019744	0.026782	0.006568	0.946906
Rv0017c	OTHER	0.163697	0.027313	0.011022	0.797967
Rv1347c	OTHER	0.007835	0.001219	0.00096	0.989986
Rv1214c	TAT(Tat/SPI)	0.258987	0.338926	0.182442	0.219645	CS pos: 35-36. ACA-DE. Pr: 0.0969
Rv3306c	OTHER	0.017224	0.025889	0.00168	0.955207
Rv3439c	OTHER	0.019763	0.001003	0.003439	0.975795
Rv3742c	OTHER	0.027988	0.058021	0.00782	0.906172
Rv0278c	SP(Sec/SPI)	0.460785	0.178594	0.023941	0.33668	CS pos: 33-34. AAA-AN. Pr: 0.1272
Rv2239c	OTHER	0.016064	0.000841	0.00188	0.981215
Rv2675c	OTHER	0.019441	0.003485	0.001909	0.975166
Rv0720	OTHER	0.014469	0.012734	0.003092	0.969704
Rv0722	OTHER	0.005866	0.003329	0.002073	0.988733
Rv0721	OTHER	0.02372	0.022068	0.011845	0.942368
Rv0724	OTHER	0.223151	0.020981	0.014119	0.74175
Rv3741c	OTHER	0.020937	0.019401	0.004423	0.955239
Rv0723	OTHER	0.018584	0.016729	0.010056	0.95463
Rv0729	OTHER	0.018423	0.011195	0.003729	0.966653
Rv3305c	OTHER	0.010577	0.000792	0.000915	0.987716
Rv0580c	OTHER	0.005106	0.002889	0.001595	0.99041
Rv2410c	OTHER	0.001966	0.000117	0.000465	0.997452
Rv0011c	OTHER	0.002169	0.000444	0.002935	0.994453
Rv0277c	OTHER	0.005129	0.000298	0.001384	0.993189
Rv2676c	OTHER	0.192997	0.01155	0.008747	0.786706
Rv0711	OTHER	0.006051	0.000685	0.001054	0.99221
Rv0710	OTHER	0.072051	0.112979	0.015943	0.799027
Rv0713	OTHER	0.009646	0.001057	0.00589	0.983407
Rv0712	OTHER	0.009219	0.00162	0.001075	0.988087
Rv3740c	OTHER	0.008942	0.007326	0.001982	0.98175
Rv0715	OTHER	0.016156	0.001718	0.006972	0.975153
Rv1781c	OTHER	0.08035	0.325784	0.004036	0.589829
Rv0714	OTHER	0.00867	0.005557	0.002047	0.983726
Rv0717	OTHER	0.123806	0.016407	0.028202	0.831586
Rv0716	OTHER	0.015921	0.001522	0.001089	0.981468
Rv0719	OTHER	0.016739	0.002063	0.001757	0.979441
Rv0718	OTHER	0.006651	0.001085	0.001353	0.990912
Rv1212c	OTHER	0.018842	0.004798	0.002032	0.974329
Rv2540c	OTHER	0.061539	0.014508	0.006595	0.917358
Rv0450c	OTHER	0.072514	0.003227	0.013149	0.911111
Rv0583c	LIPO(Sec/SPII)	0.000712	8.9e-05	0.999067	0.000132	CS pos: 19-20. LAG-CS. Pr: 0.9995
Rv0014c	OTHER	0.002342	0.001292	0.000658	0.995707
Rv2104c	OTHER	0.015382	0.008649	0.00333	0.972638
Rv0700	OTHER	0.019727	0.003518	0.004931	0.971825
Rv0702	OTHER	0.009656	0.009803	0.000629	0.979912
Rv0701	OTHER	0.034306	0.002269	0.002952	0.960473
Rv0704	OTHER	0.02202	0.023229	0.004721	0.95003
Rv0703	OTHER	0.003791	0.000433	0.000908	0.994868
Rv1342c	OTHER	0.007309	0.00035	0.013224	0.979116
Rv1475c	OTHER	0.008738	0.000667	0.00118	0.989415
Rv0706	OTHER	0.033062	0.010752	0.003075	0.953111
Rv0705	OTHER	0.003043	0.001743	0.000392	0.994822
Rv0708	OTHER	0.016112	0.004329	0.001899	0.977661
Rv0707	OTHER	0.003927	0.000457	0.001253	0.994362
Rv0709	OTHER	0.002217	0.001445	0.000657	0.995681
Rv3436c	OTHER	0.007419	0.000989	0.002439	0.989153
Rv3569c	OTHER	0.007351	0.001242	0.000772	0.990635
Rv3303c	OTHER	0.118347	0.009259	0.044281	0.828112
Rv1039c	TAT(Tat/SPI)	0.212201	0.386718	0.015591	0.385491	CS pos: 35-36. GLA-AE. Pr: 0.2035
Rv0279c	OTHER	0.271312	0.095241	0.017845	0.615602
Rv2238c	OTHER	0.121304	0.003504	0.038637	0.836556
Rv1343c	LIPO(Sec/SPII)	0.008893	0.005849	0.770443	0.214815	CS pos: 21-22. TCG-CL. Pr: 0.6764
Rv3568c	OTHER	0.010545	0.001003	0.001466	0.986986
Rv3302c	OTHER	0.039915	0.004385	0.003968	0.951733
Rv3435c	OTHER	0.377067	0.002259	0.036561	0.584113
Rv1170	OTHER	0.014427	0.001592	0.002104	0.981878
Rv1171	OTHER	0.048224	0.004406	0.006675	0.940694
Rv1173	OTHER	0.038918	0.074825	0.001931	0.884326
Rv3392c	OTHER	0.002613	0.00037	0.000565	0.996452
Rv0630c	OTHER	0.013048	0.0202	0.001862	0.96489
Rv1178	OTHER	0.069672	0.011885	0.015763	0.90268
Rv1177	OTHER	0.026655	0.000343	0.005448	0.967554
Rv2857c	OTHER	0.152108	0.160549	0.026801	0.660542
Rv2724c	OTHER	0.003181	0.000803	0.000409	0.995608
Rv0327c	OTHER	0.001352	0.000263	0.000423	0.997962
Rv0897c	OTHER	0.0116	0.053446	0.002542	0.932412
Rv0764c	OTHER	0.00547	0.000732	0.000769	0.993029
Rv3923c	OTHER	0.012069	0.005674	0.007567	0.974689
Rv1962c	OTHER	0.003561	0.000458	0.000317	0.995665
Rv1526c	OTHER	0.023221	0.005019	0.00241	0.96935
Rv1161	OTHER	0.043722	0.002355	0.003388	0.950534
Rv2492	OTHER	0.041196	0.014352	0.006149	0.938303
Rv3619c	OTHER	0.040878	0.00528	0.004918	0.948924
Rv1160	OTHER	0.037909	0.003108	0.163513	0.79547
Rv2063A	OTHER	0.042671	0.057927	0.019288	0.880114
Rv2491	OTHER	0.024029	0.005088	0.002679	0.968204
Rv1163	OTHER	0.014753	0.057118	0.002298	0.925831
Rv2062c	OTHER	0.015177	0.000806	0.002866	0.981151
Rv2494	OTHER	0.073122	0.038194	0.005936	0.882748
Rv1162	OTHER	0.177273	0.0019	0.185926	0.634901
Rv2493	OTHER	0.01994	0.072958	0.003155	0.903948
Rv1165	OTHER	0.004861	0.000648	0.000753	0.993738
Rv1164	OTHER	0.000741	6.5e-05	0.001941	0.997253
Rv1166	LIPO(Sec/SPII)	0.000985	0.007421	0.991261	0.000333	CS pos: 27-28. LAG-CT. Pr: 0.5974
Rv2858c	OTHER	0.007308	0.006883	0.001072	0.984736
Rv2725c	OTHER	0.009149	0.001167	0.001632	0.988052
Rv0898c	OTHER	0.014532	0.003196	0.000903	0.981369
Rv0765c	TAT(Tat/SPI)	0.060053	0.759436	0.013656	0.166855	CS pos: 27-28. ATA-TE. Pr: 0.2076
Rv3922c	OTHER	0.074227	0.016733	0.018969	0.890071
Rv2061c	OTHER	0.009943	0.002611	0.005907	0.981538
Rv1963c	OTHER	0.004411	0.001916	0.000589	0.993084
Rv1527c	LIPO(Sec/SPII)	0.014126	0.001623	0.697653	0.286598	CS pos: 23-24. GMG-CR. Pr: 0.7003
Rv1150	OTHER	0.009776	0.00359	0.004066	0.982568
Rv1152	OTHER	0.008519	0.015913	0.000846	0.974721
Rv1156	OTHER	0.10751	0.030006	0.002199	0.860285
Rv0632c	OTHER	0.015307	0.001357	0.000641	0.982695
Rv1155	OTHER	0.005817	0.002555	0.002312	0.989317
Rv2486	OTHER	0.00971	0.001061	0.000762	0.988468
Rv0500B	OTHER	0.093467	0.068148	0.068418	0.769967
Rv0500A	OTHER	0.002933	0.001332	0.000775	0.99496
Rv1159	OTHER	0.082896	0.015652	0.009187	0.892265
Rv2988c	OTHER	0.005531	0.000549	0.004993	0.988928
Rv0329c	OTHER	0.035781	0.028428	0.004806	0.930984
Rv2419c	OTHER	0.007807	0.002122	0.001144	0.988928
Rv0762c	OTHER	0.008561	0.00042	0.00131	0.989709
Rv1960c	OTHER	0.003594	0.000674	0.000578	0.995154
Rv3921c	OTHER	0.000746	0.000505	0.002234	0.996514
Rv2470	OTHER	0.003012	0.000709	0.000647	0.995632
Rv2472	OTHER	0.017979	0.027002	0.001269	0.953751
Rv1140	OTHER	0.042272	0.01531	0.017396	0.925023
Rv2471	OTHER	0.032367	0.003729	0.00655	0.957354
Rv1143	OTHER	0.013967	0.004466	0.001736	0.979831
Rv2473	TAT(Tat/SPI)	0.176493	0.441559	0.041405	0.340542	CS pos: 33-34. ATA-SQ. Pr: 0.3276
Rv0631c	OTHER	0.014183	0.006658	0.001748	0.97741
Rv1145	SP(Sec/SPI)	0.698334	0.035203	0.029026	0.237438	CS pos: 37-38. ADS-LS. Pr: 0.4014
Rv1144	OTHER	0.103338	0.024653	0.014883	0.857126
Rv1147	OTHER	0.029748	0.005661	0.003222	0.961369
Rv1146	OTHER	0.20591	0.152894	0.007984	0.633212
Rv1149	OTHER	0.003979	0.000985	0.00096	0.994076
Rv0763c	OTHER	0.009221	0.001904	0.00245	0.986424
Rv2192c	OTHER	0.04508	0.008288	0.006004	0.940629
Rv1962A	OTHER	0.035123	0.076734	0.003361	0.884782
Rv3920c	OTHER	0.003775	0.000765	0.000619	0.994841
Rv2986c	OTHER	0.009473	0.006167	0.001837	0.982522
Rv0456c	OTHER	0.043319	0.003058	0.011928	0.941695
Rv2417c	OTHER	0.005358	0.000919	0.000873	0.99285
Rv0323c	OTHER	0.012093	0.002282	0.001353	0.984271
Rv0893c	OTHER	0.146571	0.057201	0.019457	0.776771
Rv0760c	OTHER	0.023307	0.001506	0.004474	0.970714
Rv1522c	SP(Sec/SPI)	0.424779	0.202773	0.037221	0.335228	CS pos: 49-50. AQA-AK. Pr: 0.5026
Rv3749c	OTHER	0.131471	0.050115	0.031069	0.787346
Rv3616c	OTHER	0.006523	0.000948	0.000607	0.991922
Rv1219c	OTHER	0.03277	0.051343	0.004075	0.911813
Rv2721c	SP(Sec/SPI)	0.688923	0.300564	0.004513	0.006	CS pos: 35-36. VAA-SP. Pr: 0.6864
Rv0455c	SP(Sec/SPI)	0.789192	0.207027	0.002978	0.000803	CS pos: 30-31. AAA-DS. Pr: 0.6126
Rv2418c	OTHER	0.127722	0.061438	0.036692	0.774148
Rv0019c	OTHER	0.022182	0.003582	0.003324	0.970912
Rv0456A	OTHER	0.023885	0.01171	0.004148	0.960257
Rv0456B	OTHER	0.057646	0.014478	0.018954	0.908922
Rv2987c	OTHER	0.003161	0.000768	0.000652	0.995418
Rv0761c	OTHER	0.023356	0.001271	0.000954	0.97442
Rv3615c	OTHER	0.030377	0.005888	0.001944	0.961791
Rv2190c	SP(Sec/SPI)	0.899116	0.068343	0.005926	0.026615	CS pos: 32-33. VLA-AN. Pr: 0.5382
Rv1190	OTHER	0.017511	0.001608	0.002515	0.978367
Rv1192	OTHER	0.011103	0.000431	0.000948	0.987517
Rv1191	OTHER	0.008147	0.016057	0.001819	0.973976
Rv1193	OTHER	0.092252	0.009335	0.017252	0.88116
Rv1196	OTHER	0.048063	0.014281	0.00623	0.931426
Rv1195	SP(Sec/SPI)	0.457086	0.211312	0.028208	0.303394	CS pos: 33-34. AAA-AP. Pr: 0.2305
Rv1198	OTHER	0.023534	0.008885	0.004466	0.963115
Rv2415c	OTHER	0.036569	0.011793	0.00402	0.947619
Rv1197	OTHER	0.052	0.115186	0.003277	0.829537
Rv2851c	OTHER	0.002204	0.000273	0.001323	0.996199
Rv0891c	OTHER	0.018832	0.008602	0.0016	0.970965
Rv3614c	OTHER	0.015831	0.007837	0.001576	0.974756
Rv1217c	OTHER	0.032076	0.003598	0.016301	0.948024
Rv1181	OTHER	0.015444	0.001623	0.002198	0.980735
Rv1180	LIPO(Sec/SPII)	0.031267	0.001566	0.805513	0.161654	CS pos: 15-16. GMA-CR. Pr: 0.8059
Rv1183	SP(Sec/SPI)	0.882789	0.014366	0.031912	0.070933	CS pos: 20-21. SLA-EM. Pr: 0.4477
Rv1182	OTHER	0.104846	0.029102	0.012513	0.853538
Rv3082c	OTHER	0.00384	0.004955	0.000431	0.990774
Rv1187	OTHER	0.009521	0.002405	0.001373	0.9867
Rv2416c	OTHER	0.034795	0.023127	0.005311	0.936767
Rv1189	OTHER	0.003065	0.000342	0.000323	0.99627
Rv2549c	OTHER	0.016131	0.006086	0.008847	0.968935
Rv2852c	OTHER	0.075497	0.08399	0.016113	0.824401
Rv1188	OTHER	0.008985	0.005331	0.004364	0.98132
Rv0457c	OTHER	0.004345	0.000637	0.001057	0.99396
Rv3746c	OTHER	0.194079	0.175206	0.004719	0.625997
Rv3879c	OTHER	0.019204	0.000692	0.000855	0.97925
Rv1218c	OTHER	0.009995	0.001003	0.00048	0.988522
Rv3613c	OTHER	0.217261	0.157967	0.029445	0.595327
Rv1837c	OTHER	0.003537	0.000177	0.000396	0.995891
Rv1704c	OTHER	0.012538	0.066613	0.024374	0.896475
Rv2372c	OTHER	0.011085	0.001981	0.002155	0.984779
Rv1332	OTHER	0.015278	0.006139	0.005357	0.973227
Rv2663	OTHER	0.00384	0.000965	0.000976	0.994219
Rv0001	OTHER	0.016269	0.000987	0.006007	0.976736
Rv1331	OTHER	0.015344	0.000907	0.001938	0.98181
Rv2662	OTHER	0.011528	0.011417	0.004263	0.972792
Rv0002	OTHER	0.027544	0.00645	0.003742	0.962264
Rv1334	OTHER	0.118423	0.010961	0.028389	0.842227
Rv2665	OTHER	0.01069	0.017354	0.004899	0.967057
Rv0003	OTHER	0.009137	0.001894	0.001013	0.987956
Rv1333	OTHER	0.13431	0.024469	0.018091	0.82313
Rv2664	OTHER	0.046966	0.01022	0.002819	0.939995
Rv2902c	OTHER	0.045932	0.015265	0.004177	0.934626
Rv0004	OTHER	0.037309	0.098585	0.009697	0.85441
Rv1336	OTHER	0.004979	0.001262	0.001657	0.992102
Rv2667	OTHER	0.002631	0.000271	0.00022	0.996877
Rv0005	OTHER	0.004157	0.000371	0.000829	0.994643
Rv1335	OTHER	0.030006	0.00332	0.004941	0.961733
Rv2666	OTHER	0.117555	0.207017	0.005247	0.670181
Rv0006	OTHER	0.0036	0.002534	0.0005	0.993365
Rv0505c	OTHER	0.04939	0.035024	0.01794	0.897646
Rv1338	OTHER	0.036667	0.003156	0.002766	0.957412
Rv2669	OTHER	0.015662	0.004901	0.007585	0.971851
Rv0007	OTHER	0.039933	0.029822	0.026228	0.904018
Rv1337	OTHER	0.021123	0.007752	0.016728	0.954398
Rv2668	SP(Sec/SPI)	0.987879	0.001558	0.010089	0.000474	CS pos: 29-30. AWA-GD. Pr: 0.5892
Rv3136A	OTHER	0.373099	0.020674	0.081597	0.524631
Rv0009	OTHER	0.033332	0.006472	0.005567	0.954629
Rv1339	LIPO(Sec/SPII)	0.015438	0.001839	0.970251	0.012472	CS pos: 24-25. VLG-CS. Pr: 0.9705
Rv1041c	OTHER	0.189199	0.109197	0.060005	0.641599
Rv1174c	SP(Sec/SPI)	0.990088	0.006836	0.002273	0.000803	CS pos: 28-29. ASA-DP. Pr: 0.8121
Rv3002c	OTHER	0.009361	0.009956	0.001425	0.979258
Rv1705c	OTHER	0.120473	0.030222	0.011778	0.837528
Rv1838c	OTHER	0.005598	0.000231	0.000952	0.993219
Rv1706A	OTHER	0.208707	0.047778	0.055278	0.688236
Rv2373c	OTHER	0.007464	0.000976	0.002081	0.989479
Rv2240c	LIPO(Sec/SPII)	0.012493	0.039916	0.938339	0.009252	CS pos: 36-37. IVG-CT. Pr: 0.8650
Rv1321	OTHER	0.069524	0.040278	0.001811	0.888387
Rv1323	OTHER	0.013464	0.021191	0.000985	0.964359
Rv1322	OTHER	0.069498	0.04087	0.005843	0.883788
Rv0504c	OTHER	0.004924	0.000598	0.002091	0.992386
Rv1324	OTHER	0.096378	0.038281	0.010697	0.854644
Rv0943c	OTHER	0.025365	0.0122	0.006893	0.955542
Rv1175c	OTHER	0.010402	0.001614	0.001162	0.986822
Rv0810c	OTHER	0.024932	0.004441	0.004427	0.9662
Rv2903c	OTHER	0.019242	0.021045	0.002545	0.957168
Rv1328	OTHER	0.004263	0.000423	0.000619	0.994694
Rv1042c	OTHER	0.003979	0.000985	0.00096	0.994076
Rv3570c	OTHER	0.014582	0.000705	0.000614	0.984099
Rv3001c	OTHER	0.012176	0.003422	0.002973	0.981429
Rv3134c	OTHER	0.018132	0.004652	0.002394	0.974822
Rv2067c	OTHER	0.014779	0.000303	0.001337	0.983581
Rv2370c	OTHER	0.00915	0.006263	0.001328	0.983259
Rv1310	OTHER	0.006181	0.000628	0.000692	0.992499
Rv2641	OTHER	0.006381	0.000619	0.000557	0.992442
Rv1312	OTHER	0.065908	0.003262	0.013244	0.917585
Rv2643	OTHER	0.005791	0.002994	0.004366	0.986849
Rv1311	OTHER	0.001662	0.000437	0.000359	0.997542
Rv2642	OTHER	0.06722	0.029685	0.005071	0.898024
Rv2645	OTHER	0.145389	0.02938	0.044286	0.780946
Rv2900c	OTHER	0.007701	0.020536	0.0018	0.969964
Rv2647	OTHER	0.00963	0.004563	0.00305	0.982757
Rv1315	OTHER	0.08533	0.023805	0.020873	0.869993
Rv2646	OTHER	0.013722	0.007857	0.003101	0.97532
Rv2649	OTHER	0.013323	0.001265	0.004533	0.980878
Rv3266c	OTHER	0.169178	0.262422	0.01362	0.554779
Rv2648	OTHER	0.014446	0.008318	0.004296	0.97294
Rv0940c	OTHER	0.139509	0.02175	0.015834	0.822906
Rv1172c	OTHER	0.326996	0.201815	0.029257	0.441933
Rv3133c	OTHER	0.005661	0.002205	0.000539	0.991595
Rv1835c	OTHER	0.028258	0.018323	0.012374	0.941045
Rv1702c	OTHER	0.003031	0.001274	0.001329	0.994366
Rv2068c	LIPO(Sec/SPII)	0.021704	0.28071	0.696134	0.001452	CS pos: 23-24. VTG-CA. Pr: 0.6983
Rv1836c	OTHER	0.031575	0.01407	0.005812	0.948543
Rv2630	OTHER	0.048059	0.043823	0.017624	0.890494
Rv1301	OTHER	0.058854	0.087115	0.003433	0.850599
Rv2901c	OTHER	0.002871	0.000948	0.000318	0.995863
Rv1300	OTHER	0.065456	0.079088	0.00439	0.851066
Rv2631	OTHER	0.193284	0.015835	0.005435	0.785446
Rv1303	OTHER	0.01019	0.000337	0.00371	0.985764
Rv1302	OTHER	0.018175	0.015348	0.006932	0.959546
Rv1305	OTHER	0.1011	0.071872	0.073365	0.753663
Rv2636	OTHER	0.05139	0.054324	0.010306	0.88398
Rv1304	OTHER	0.003842	0.000328	0.000602	0.995228
Rv2635	OTHER	0.029529	0.006034	0.005286	0.959151
Rv0941c	OTHER	0.040287	0.002723	0.005948	0.951042
Rv1307	OTHER	0.135497	0.01847	0.013207	0.832826
Rv2638	OTHER	0.012411	0.001723	0.000709	0.985157
Rv3398c	OTHER	0.023686	0.015136	0.002907	0.958271
Rv1306	OTHER	0.011807	0.000278	0.004302	0.983613
Rv2637	OTHER	0.175597	0.011498	0.016616	0.796288
Rv3265c	OTHER	0.088716	0.063491	0.011825	0.835967
Rv1309	OTHER	0.013403	0.007395	0.001104	0.978097
Rv1040c	SP(Sec/SPI)	0.395814	0.383768	0.017327	0.203092	CS pos: 33-34. AAA-AP. Pr: 0.2829
Rv1308	OTHER	0.004512	0.000304	0.000435	0.994748
Rv3132c	OTHER	0.002352	0.000495	0.000187	0.996966
Rv1703c	OTHER	0.00567	0.004997	0.000623	0.98871
Rv2198c	OTHER	0.068503	0.045903	0.010082	0.875511
Rv1372	OTHER	0.024248	0.021967	0.0067	0.947085
Rv0041	OTHER	0.019157	0.00619	0.00255	0.972103
Rv1371	OTHER	0.017992	0.002463	0.005525	0.97402
Rv1373	OTHER	0.005949	0.000619	0.000693	0.992739
Rv1376	OTHER	0.136498	0.009559	0.022254	0.831688
Rv1375	OTHER	0.069882	0.023472	0.014789	0.891858
Rv0634c	OTHER	0.007886	0.003143	0.000995	0.987976
Rv0049	OTHER	0.026285	0.056625	0.010946	0.906145
Rv1379	OTHER	0.010841	0.007209	0.001811	0.980139
Rv2728c	OTHER	0.387708	0.037448	0.015386	0.559459
Rv3397c	OTHER	0.005992	0.001815	0.001095	0.991097
Rv3264c	OTHER	0.154962	0.053367	0.006244	0.785428
Rv1833c	OTHER	0.004537	0.000289	0.0008	0.994374
Rv2199c	OTHER	0.034249	0.005726	0.016067	0.943957
Rv2692	OTHER	0.013877	0.000444	0.003184	0.982495
Rv0030	OTHER	0.004907	0.001552	0.00055	0.992991
Rv1360	OTHER	0.015274	0.002104	0.002458	0.980164
Rv2691	OTHER	0.016924	0.00055	0.003126	0.9794
Rv0031	OTHER	0.038096	0.025478	0.015294	0.921132
Rv0032	OTHER	0.004476	0.000952	0.000718	0.993854
Rv0033	OTHER	0.001939	0.000153	0.000281	0.997627
Rv0034	OTHER	0.028822	0.026109	0.004739	0.94033
Rv2695	OTHER	0.010644	0.021543	0.003637	0.964175
Rv0035	LIPO(Sec/SPII)	0.028226	0.002903	0.549841	0.41903	CS pos: 17-18. ISA-CT. Pr: 0.5605
Rv0633c	OTHER	0.008211	0.003614	0.004959	0.983216
Rv2698	OTHER	0.069079	0.000891	0.025383	0.904647
Rv1366	OTHER	0.025171	0.001874	0.003504	0.969451
Rv0634B	OTHER	0.079112	0.006972	0.032939	0.880977
Rv0038	OTHER	0.005327	0.00156	0.002437	0.990675
Rv0634A	OTHER	0.001962	0.000395	0.000533	0.99711
Rv1368	LIPO(Sec/SPII)	0.013934	0.035698	0.947167	0.003201	CS pos: 38-39. VAG-CG. Pr: 0.9458
Rv2729c	OTHER	0.063586	0.012127	0.046375	0.877912
Rv3396c	OTHER	0.005438	0.001228	0.00139	0.991945
Rv3130c	OTHER	0.010757	0.02845	0.002068	0.958725
Rv1528c	OTHER	0.005278	0.000796	0.000635	0.99329
Rv1350	OTHER	0.11652	0.079269	0.012618	0.791594
Rv2681	OTHER	0.019161	0.005362	0.003509	0.971968
Rv2680	OTHER	0.015154	0.070865	0.00216	0.911821
Rv1352	SP(Sec/SPI)	0.91307	0.08473	0.001285	0.000915	CS pos: 30-31. ARA-ET. Pr: 0.9810
Rv2683	OTHER	0.017381	0.00281	0.001757	0.978052
Rv1351	LIPO(Sec/SPII)	0.128765	0.041027	0.600469	0.229738	CS pos: 47-48. VAG-CK. Pr: 0.5202
Rv2685	OTHER	0.039819	0.000936	0.0992	0.860045
Rv0023	OTHER	0.02632	0.285671	0.007142	0.680867
Rv2684	OTHER	0.033334	0.000756	0.081582	0.884328
Rv0024	OTHER	0.014686	0.009084	0.003185	0.973045
Rv2726c	OTHER	0.042845	0.057626	0.002541	0.896988
Rv0025	OTHER	0.004818	0.003264	0.000947	0.990972
Rv0026	OTHER	0.008837	0.00099	0.002688	0.987486
Rv0503c	OTHER	0.009312	0.001114	0.001963	0.987611
Rv1358	OTHER	0.006131	0.041863	0.001316	0.95069
Rv0027	OTHER	0.006022	0.001729	0.001406	0.990843
Rv0028	OTHER	0.007872	0.000951	0.002322	0.988855
Rv0029	OTHER	0.048588	0.011704	0.0291	0.910608
Rv1359	OTHER	0.009009	0.005814	0.000712	0.984465
Rv0766c	OTHER	0.01172	0.000352	0.000328	0.9876
Rv2859c	OTHER	0.035434	0.058414	0.016504	0.889648
Rv3395c	OTHER	0.022193	0.120246	0.004056	0.853506
Rv2197c	OTHER	0.121873	0.015918	0.01372	0.848489
Rv1341	OTHER	0.14973	0.105035	0.065883	0.679352
Rv2672	LIPO(Sec/SPII)	0.222441	0.02371	0.748602	0.005246	CS pos: 29-30. LAA-CV. Pr: 0.5786
Rv3260c	OTHER	0.01565	0.003152	0.001927	0.97927
Rv1340	OTHER	0.010049	0.009603	0.000961	0.979387
Rv2671	OTHER	0.009352	0.000873	0.00161	0.988165
Rv2674	OTHER	0.097117	0.005731	0.004061	0.893091
Rv0012	SP(Sec/SPI)	0.419501	0.09467	0.177194	0.308634	CS pos: 47-48. VSG-GT. Pr: 0.1660
Rv2673	OTHER	0.078037	0.089989	0.044164	0.78781
Rv0013	OTHER	0.012211	0.000863	0.000707	0.986219
Rv1345	OTHER	0.009128	0.001321	0.001321	0.98823
Rv1344	OTHER	0.118437	0.028463	0.025264	0.827836
Rv1346	OTHER	0.006587	0.00083	0.001195	0.991389
Rv1349	OTHER	0.035973	0.005391	0.056357	0.902279
Rv0767c	OTHER	0.0612	0.204269	0.00284	0.731691
Rv1348	OTHER	0.009251	0.003235	0.000963	0.986551
Rv2679	OTHER	0.002857	0.000302	0.000509	0.996331
Rv2727c	OTHER	0.019238	0.004405	0.003019	0.973338
Rv3395A	SP(Sec/SPI)	0.737379	0.056665	0.181456	0.0245	CS pos: 30-31. ATG-GG. Pr: 0.2387
Rv3394c	TAT(Tat/SPI)	0.159621	0.591188	0.073788	0.175403	CS pos: 37-38. TLA-NR. Pr: 0.1358
Rv3924c	OTHER	0.102345	0.101907	0.038898	0.75685
Rv2550c	OTHER	0.004529	0.0007	0.000892	0.99388
Rv0590A	OTHER	0.013547	0.000347	0.000387	0.98572
Rv0020c	OTHER	0.00483	0.001421	0.000783	0.992966
Rv0153c	OTHER	0.004769	0.003402	0.001345	0.990484
Rv0881	OTHER	0.00795	0.010337	0.003158	0.978555
Rv0817c	SP(Sec/SPI)	0.614592	0.012506	0.05215	0.320753	CS pos: 27-28. VGA-DF. Pr: 0.2547
Rv0880	OTHER	0.0409	0.154725	0.004436	0.799939
Rv0882	OTHER	0.005878	0.002922	0.007477	0.983724
Rv3910	OTHER	0.097994	0.032687	0.0173	0.852019
Rv0885	OTHER	0.00573	0.000818	0.001353	0.992099
Rv3913	OTHER	0.053398	0.086551	0.00519	0.854861
Rv0886	OTHER	0.053901	0.01388	0.018556	0.913662
Rv3882c	OTHER	0.022704	0.009844	0.097571	0.86988
Rv3914	OTHER	0.019959	0.001005	0.001427	0.97761
Rv3911	OTHER	0.003727	0.000622	0.00078	0.994871
Rv0888	SP(Sec/SPI)	0.919407	0.051126	0.023597	0.00587	CS pos: 31-32. GSA-AP. Pr: 0.4055
Rv3912	OTHER	0.0053	0.001716	0.001613	0.991371
Rv3915	OTHER	0.006465	0.002289	0.002184	0.989062
Rv3579c	OTHER	0.056499	0.333607	0.019868	0.590025
Rv3313c	OTHER	0.00632	0.000474	0.000643	0.992562
Rv3446c	OTHER	0.028118	0.020651	0.004105	0.947126
Rv2551c	OTHER	0.06173	0.014461	0.309498	0.614311
Rv0152c	OTHER	0.29464	0.268317	0.017493	0.41955
Rv0871	OTHER	0.008691	0.002405	0.000996	0.987908
Rv0873	OTHER	0.003756	0.001389	0.000928	0.993928
Rv2115c	OTHER	0.00551	0.015669	0.000967	0.977854
Rv3312c	OTHER	0.015627	0.003911	0.000997	0.979465
Rv3881c	OTHER	0.007547	0.004784	0.00182	0.985849
Rv0877	OTHER	0.035309	0.010936	0.003812	0.949943
Rv3009c	OTHER	0.177185	0.003348	0.003266	0.816201
Rv1353c	OTHER	0.004729	0.000891	0.001442	0.992938
Rv1486c	OTHER	0.28262	0.013859	0.085139	0.618381
Rv1220c	OTHER	0.051829	0.113308	0.003941	0.830922
Rv3908	OTHER	0.073566	0.190323	0.051195	0.684916
Rv3909	SP(Sec/SPI)	0.779615	0.21163	0.00452	0.004235	CS pos: 39-40. ALA-GE. Pr: 0.7903
Rv3445c	OTHER	0.010047	0.028087	0.001519	0.960348
Rv2112c	OTHER	0.176661	0.183499	0.183923	0.455917
Rv0022c	OTHER	0.010271	0.005637	0.004162	0.97993
Rv0815c	OTHER	0.002924	0.000156	0.000568	0.996351
Rv0860	OTHER	0.007637	0.000642	0.002113	0.989608
Rv0948c	OTHER	0.007241	0.009404	0.000496	0.982859
Rv2378c	OTHER	0.355382	0.031464	0.037375	0.57578
Rv0863	OTHER	0.018904	0.001253	0.009303	0.97054
Rv0865	OTHER	0.118567	0.009103	0.014429	0.8579
Rv0864	OTHER	0.038444	0.05994	0.003139	0.898477
Rv3444c	OTHER	0.004633	0.003138	0.000457	0.991773
Rv0866	OTHER	0.003692	0.002273	0.000413	0.993622
Rv2908c	OTHER	0.007631	0.000713	0.000568	0.991088
Rv3880c	OTHER	0.011641	0.001661	0.002986	0.983712
Rv3312A	SP(Sec/SPI)	0.986791	0.008464	0.00453	0.000216	CS pos: 31-32. SAA-QT. Pr: 0.4825
Rv0154c	OTHER	0.008528	0.00211	0.001082	0.98828
Rv0021c	OTHER	0.105227	0.006182	0.006672	0.88192
Rv2682c	OTHER	0.007994	0.060464	0.000616	0.930926
Rv0816c	OTHER	0.143194	0.117925	0.03113	0.707751
Rv0850	OTHER	0.03122	0.012477	0.008476	0.947827
Rv2379c	OTHER	0.043905	0.063266	0.004086	0.888743
Rv0852	OTHER	0.098686	0.004783	0.096425	0.800106
Rv0854	OTHER	0.002829	0.000489	0.000376	0.996306
Rv3443c	OTHER	0.011969	0.002522	0.002529	0.98298
Rv0856	OTHER	0.010895	0.00023	0.001903	0.986973
Rv3007c	OTHER	0.016167	0.006296	0.000764	0.976773
Rv0855	OTHER	0.026473	0.019272	0.003051	0.951204
Rv2909c	OTHER	0.012383	0.00051	0.001589	0.985518
Rv0857	OTHER	0.019107	0.001371	0.001606	0.977916
Rv0859	OTHER	0.00158	0.000244	0.000276	0.9979
Rv1048c	OTHER	0.005084	0.00094	0.001246	0.99273
Rv2110c	OTHER	0.037179	0.153915	0.002246	0.806659
Rv2376c	SP(Sec/SPI)	0.860953	0.069454	0.042725	0.026868	CS pos: 29-30. IMA-GG. Pr: 0.5835
Rv2623	OTHER	0.009045	0.001126	0.002264	0.987565
Rv0813c	OTHER	0.044827	0.03778	0.010273	0.90712
Rv0946c	OTHER	0.006381	0.000609	0.001074	0.991935
Rv2622	OTHER	0.005472	0.002025	0.000424	0.992079
Rv3575c	OTHER	0.042003	0.18341	0.012441	0.762147
Rv2906c	OTHER	0.021421	0.001374	0.003934	0.973271
Rv3442c	OTHER	0.021838	0.006933	0.003461	0.967768
Rv2629	OTHER	0.005133	0.000645	0.000788	0.993434
Rv2628	OTHER	0.055451	0.018427	0.023609	0.902513
Rv2377c	OTHER	0.005842	0.000587	0.000614	0.992956
Rv2111c	OTHER	0.00871	0.005704	0.002377	0.983209
Rv0947c	OTHER	0.008488	0.055082	0.002745	0.933685
Rv0814c	OTHER	0.01476	0.000759	0.000763	0.983718
Rv3005c	OTHER	0.046738	0.007074	0.004198	0.941989
Rv1482c	OTHER	0.028446	0.004981	0.001331	0.965242
Rv2616	OTHER	0.012683	0.001723	0.002492	0.983102
Rv3441c	OTHER	0.061817	0.182021	0.022935	0.733227
Rv1046c	OTHER	0.074289	0.190276	0.018942	0.716494
Rv2618	OTHER	0.02178	0.049116	0.004389	0.924715
Rv2907c	OTHER	0.008594	0.001183	0.001119	0.989103
Rv1179c	OTHER	0.008525	0.003175	0.003109	0.985191
Rv0151c	OTHER	0.031338	0.009222	0.001664	0.957776
Rv2374c	OTHER	0.021148	0.059592	0.002741	0.916519
Rv1839c	OTHER	0.002251	0.001141	0.000543	0.996066
Rv1706c	OTHER	0.215972	0.005701	0.076859	0.701468
Rv2601	LIPO(Sec/SPII)	0.040715	0.009808	0.484423	0.465054	CS pos: 30-31. CAA-CG. Pr: 0.2630
Rv2600	OTHER	0.007347	0.005799	0.017208	0.969646
Rv1043c	OTHER	0.088516	0.013377	0.038665	0.859442
Rv0811c	OTHER	0.011849	0.000926	0.001186	0.986039
Rv1176c	OTHER	0.030265	0.002769	0.020476	0.94649
Rv2602	OTHER	0.085506	0.02086	0.017765	0.875869
Rv3573c	OTHER	0.064416	0.141013	0.019815	0.774756
Rv2904c	OTHER	0.003792	0.001421	0.000562	0.994225
Rv2607	OTHER	0.009582	0.000509	0.001675	0.988233
Rv3440c	OTHER	0.042162	0.022855	0.00338	0.931603
Rv2608	SP(Sec/SPI)	0.398199	0.30821	0.025819	0.267773	CS pos: 30-31. ASA-WD. Pr: 0.2134
Rv0150c	OTHER	0.018531	0.00751	0.00104	0.972918
Rv0892	SP(Sec/SPI)	0.590707	0.014963	0.203574	0.190755	CS pos: 27-28. LSA-GI. Pr: 0.2371
Rv0894	OTHER	0.003446	0.001484	0.001367	0.993703
Rv0896	OTHER	0.010882	0.00627	0.000656	0.982191
Rv0895	OTHER	0.020754	0.015878	0.00264	0.960729
Rv0899	OTHER	0.166548	0.02793	0.025744	0.779778
Rv3003c	OTHER	0.015598	0.003046	0.000821	0.980535
Rv3070	OTHER	0.014075	0.001535	0.015976	0.968414
Rv3071	OTHER	0.01781	0.01242	0.002627	0.967144
Rv2861c	OTHER	0.046391	0.012867	0.00464	0.936102
Rv3076	OTHER	0.025142	0.004819	0.006395	0.963644
Rv3077	OTHER	0.00885	0.002237	0.001036	0.987878
Rv3093c	OTHER	0.007147	0.004002	0.000689	0.988162
Rv3074	OTHER	0.018569	0.252167	0.002909	0.726356
Rv0464c	OTHER	0.018231	0.004743	0.006548	0.970477
Rv0597c	OTHER	0.141364	0.011388	0.008627	0.838621
Rv2862A	OTHER	0.005717	0.010301	0.001567	0.982415
Rv3078	OTHER	0.077717	0.001751	0.136975	0.783557
Rv2425c	OTHER	0.046623	0.022149	0.008996	0.922232
Rv0801	OTHER	0.006729	0.000699	0.001425	0.991146
Rv0800	OTHER	0.013402	0.001985	0.004593	0.98002
Rv0803	OTHER	0.014318	0.001512	0.002486	0.981685
Rv0805	OTHER	0.003492	0.000717	0.000414	0.995377
Rv0804	OTHER	0.116029	0.081016	0.084794	0.718162
Rv0807	OTHER	0.023297	0.019237	0.002824	0.954643
Rv3757c	OTHER	0.014057	0.002565	0.013137	0.970241
Rv0809	OTHER	0.009119	0.003205	0.001822	0.985854
Rv0808	OTHER	0.012217	0.001213	0.001782	0.984789
Rv3624c	OTHER	0.338632	0.029049	0.056601	0.575718
Rv1227c	OTHER	0.023562	0.006162	0.010642	0.959634
Rv3062	OTHER	0.018153	0.005585	0.004697	0.971565
Rv3065	OTHER	0.060851	0.001719	0.029852	0.907578
Rv3092c	OTHER	0.141834	0.124099	0.021288	0.712779
Rv3066	OTHER	0.053195	0.083221	0.009918	0.853667
Rv3063	OTHER	0.006165	0.000864	0.008771	0.9842
Rv0330c	OTHER	0.039753	0.023243	0.007144	0.929859
Rv0596c	OTHER	0.006348	0.000946	0.000585	0.992121
Rv2426c	OTHER	0.016839	0.012505	0.001313	0.969343
Rv3069	TAT(Tat/SPI)	0.09645	0.661574	0.014593	0.227383	CS pos: 30-31. ALA-IP. Pr: 0.5212
Rv2559c	OTHER	0.009059	0.005326	0.001131	0.984484
Rv3067	SP(Sec/SPI)	0.548159	0.05935	0.128624	0.263868	CS pos: 31-32. AAA-TP. Pr: 0.1992
Rv2427A	OTHER	0.093652	0.318156	0.027205	0.560987
Rv2862c	OTHER	0.009094	0.017211	0.001647	0.972048
Rv2995c	OTHER	0.013129	0.00033	0.001337	0.985204
Rv3889c	OTHER	0.014594	0.002444	0.008709	0.974252
Rv3756c	OTHER	0.069175	0.00741	0.012338	0.911077
Rv2992c	OTHER	0.008722	0.000744	0.001492	0.989042
Rv3055	OTHER	0.02622	0.020928	0.001865	0.950987
Rv2689c	OTHER	0.02994	0.004822	0.011131	0.954107
Rv3059	OTHER	0.005211	0.002129	0.000738	0.991922
Rv3056	OTHER	0.010118	0.002673	0.001923	0.985286
Rv0599c	OTHER	0.006195	0.001129	0.000636	0.99204
Rv2556c	OTHER	0.017603	0.004203	0.002182	0.976012
Rv1225c	OTHER	0.031003	0.016155	0.003597	0.949245
Rv3622c	OTHER	0.061873	0.148318	0.007234	0.782576
Rv3755c	OTHER	0.043105	0.015943	0.006737	0.934215
Rv3888c	OTHER	0.008003	0.002048	0.002751	0.987199
Rv2860c	OTHER	0.010853	0.001859	0.001035	0.986253
Rv2993c	OTHER	0.034906	0.003001	0.008194	0.9539
Rv3044	LIPO(Sec/SPII)	0.004239	0.000375	0.99498	0.000406	CS pos: 19-20. SSG-CG. Pr: 0.9930
Rv0465c	OTHER	0.004477	0.000758	0.000673	0.994092
Rv0598c	OTHER	0.142296	0.035041	0.00394	0.818723
Rv3045	OTHER	0.079407	0.005579	0.014212	0.900802
Rv2424c	OTHER	0.015064	0.016251	0.003376	0.965309
Rv1226c	OTHER	0.022056	0.006786	0.045985	0.925173
Rv3621c	OTHER	0.22757	0.128489	0.009884	0.634058
Rv3887c	OTHER	0.010102	0.000388	0.002207	0.987304
Rv2421c	OTHER	0.003958	0.000772	0.000579	0.994692
Rv2990c	OTHER	0.00609	0.001512	0.000935	0.991462
Rv2118c	OTHER	0.012126	0.002976	0.00311	0.981788
Rv2687c	OTHER	0.034512	0.007682	0.008922	0.948884
Rv2554c	OTHER	0.037364	0.036941	0.039349	0.886346
Rv0841	OTHER	0.062963	0.008862	0.017854	0.910321
Rv0843	OTHER	0.004295	0.003157	0.000365	0.992183
Rv0842	OTHER	0.049619	0.008853	0.007479	0.934049
Rv0845	OTHER	0.025789	0.0051	0.006693	0.962418
Rv3620c	OTHER	0.062349	0.11604	0.004124	0.817486
Rv0847	LIPO(Sec/SPII)	0.036643	0.003828	0.948613	0.010916	CS pos: 23-24. AAA-CW. Pr: 0.9544
Rv0849	OTHER	0.009385	0.000524	0.000879	0.989212
Rv0848	OTHER	0.020516	0.004986	0.003656	0.970843
Rv1356c	OTHER	0.007915	0.000565	0.001965	0.989554
Rv3753c	OTHER	0.008021	0.001814	0.001124	0.989041
Rv3886c	SP(Sec/SPI)	0.686419	0.299753	0.012385	0.001442	CS pos: 33-34. AQA-IP. Pr: 0.8504
Rv0157A	OTHER	0.185664	0.029577	0.020204	0.764555
Rv2688c	OTHER	0.017302	0.003189	0.00161	0.977899
Rv2555c	OTHER	0.005972	0.002601	0.001073	0.990355
Rv0830	TAT(Tat/SPI)	0.239403	0.694886	0.002003	0.063708	CS pos: 29-30. ALA-AD. Pr: 0.8688
Rv0832	SP(Sec/SPI)	0.707646	0.171488	0.023676	0.09719	CS pos: 43-44. AAA-AD. Pr: 0.2738
Rv3752c	OTHER	0.060567	0.048607	0.01164	0.879185
Rv0833	OTHER	0.41962	0.088059	0.032418	0.459903
Rv0835	LIPO(Sec/SPII)	0.007523	0.000449	0.991491	0.000537	CS pos: 22-23. TTA-CS. Pr: 0.9867
Rv0838	LIPO(Sec/SPII)	0.035413	0.000456	0.962467	0.001663	CS pos: 22-23. ACA-CD. Pr: 0.5949
Rv0839	OTHER	0.065294	0.028335	0.076878	0.829493
Rv1357c	OTHER	0.015201	0.002635	0.001691	0.980474
Rv3885c	OTHER	0.019672	0.006121	0.098	0.876207
Rv3095	OTHER	0.001209	0.001046	0.000303	0.997442
Rv2552c	OTHER	0.02601	0.00355	0.002313	0.968127
Rv3096	SP(Sec/SPI)	0.677744	0.316792	0.003806	0.001659	CS pos: 27-28. AAA-EE. Pr: 0.9407
Rv0595c	OTHER	0.007454	0.006713	0.001047	0.984786
Rv0159c	OTHER	0.149831	0.210564	0.014403	0.625202
Rv2249c	OTHER	0.039446	0.027174	0.003481	0.929899
Rv0820	OTHER	0.023498	0.008772	0.039266	0.928464
Rv3884c	OTHER	0.066013	0.070502	0.004892	0.858592
Rv1354c	OTHER	0.006801	0.001252	0.000735	0.991212
Rv0826	OTHER	0.111182	0.017632	0.021794	0.849392
Rv0829	OTHER	0.013452	0.001528	0.00868	0.97634
Rv3315c	OTHER	0.145359	0.219721	0.005802	0.629118
Rv3083	LIPO(Sec/SPII)	0.04896	0.01459	0.80737	0.12908	CS pos: 20-21. GTA-CH. Pr: 0.8092
Rv3084	OTHER	0.167396	0.282843	0.0756	0.474161
Rv2420c	OTHER	0.020653	0.005203	0.005465	0.968679
Rv3081	OTHER	0.00784	0.010871	0.002555	0.978733
Rv2553c	OTHER	0.051652	0.005141	0.01861	0.924597
Rv3087	OTHER	0.015937	0.002163	0.006401	0.975498
Rv3088	OTHER	0.015168	0.003229	0.0027	0.978903
Rv3085	OTHER	0.017719	0.017561	0.003146	0.961574
Rv3086	OTHER	0.008383	0.000249	0.000682	0.990686
Rv3089	OTHER	0.104136	0.001522	0.005995	0.888348
Rv2686c	OTHER	0.013127	0.00058	0.006444	0.979848
Rv3750c	OTHER	0.022073	0.001567	0.021107	0.955253
Rv0812	OTHER	0.003511	0.000291	0.000489	0.995709
Rv3883c	SP(Sec/SPI)	0.973004	0.00128	0.025257	0.000458	CS pos: 21-22. ASA-IT. Pr: 0.8860
Rv0818	OTHER	0.197991	0.053187	0.005838	0.742984
Rv0819	OTHER	0.01838	0.011949	0.004849	0.964823
Rv1355c	OTHER	0.001106	0.000203	0.000565	0.998127
Rv3090	OTHER	0.031063	0.006717	0.041005	0.921214
Rv3447c	OTHER	0.00888	0.00657	0.010079	0.974472
Rv3091	OTHER	0.003298	0.001613	0.000665	0.994424
Rv1489A	OTHER	0.111411	0.075954	0.006376	0.80626
Rv3314c	OTHER	0.006437	0.000243	0.000875	0.992446
Rv1293	OTHER	0.014264	0.001967	0.001016	0.982753
Rv1292	OTHER	0.062187	0.144676	0.008799	0.784338
Rv1295	OTHER	0.04818	0.001598	0.003663	0.946559
Rv2073c	OTHER	0.034897	0.175939	0.006284	0.78288
Rv1294	OTHER	0.004414	0.000422	0.000624	0.99454
Rv1297	OTHER	0.011909	0.003197	0.002389	0.982505
Rv3271c	OTHER	0.02953	0.0012	0.006053	0.963217
Rv1296	SP(Sec/SPI)	0.58745	0.038208	0.186576	0.187766	CS pos: 22-23. SSA-NL. Pr: 0.2103
Rv2603c	OTHER	0.018008	0.002963	0.004677	0.974352
Rv0642c	OTHER	0.003052	0.000471	0.000478	0.995998
Rv1299	OTHER	0.006295	0.002062	0.001282	0.990362
Rv1298	OTHER	0.084561	0.001682	0.075532	0.838225
Rv0206c	OTHER	0.377709	0.004795	0.12487	0.492627
Rv2869c	OTHER	0.144744	0.005137	0.167095	0.683024
Rv2736c	OTHER	0.01071	0.005498	0.002554	0.981239
Rv0339c	OTHER	0.041153	0.163651	0.002831	0.792365
Rv2737A	OTHER	0.138067	0.165472	0.045467	0.650994
Rv0776c	OTHER	0.030464	0.002337	0.007282	0.959916
Rv3802c	OTHER	0.258194	0.076055	0.062179	0.603572
Rv2072c	OTHER	0.005939	0.001711	0.001422	0.990928
Rv1841c	OTHER	0.260829	0.032991	0.046226	0.659954
Rv1405c	OTHER	0.02888	0.018299	0.001918	0.950903
Rv1538c	OTHER	0.09676	0.018097	0.020403	0.86474
Rv1284	OTHER	0.008011	0.000414	0.003696	0.987879
Rv1286	OTHER	0.009646	0.00085	0.001654	0.987851
Rv1285	OTHER	0.003177	0.000183	0.000304	0.996336
Rv1288	OTHER	0.017223	0.002193	0.003826	0.976758
Rv2604c	OTHER	0.006823	0.000717	0.002358	0.990103
Rv1287	OTHER	0.338173	0.14291	0.023481	0.495435
Rv2737c	OTHER	0.007452	0.006201	0.001111	0.985236
Rv1289	OTHER	0.011756	0.002369	0.044778	0.941097
Rv0338c	OTHER	0.064228	0.027287	0.011655	0.89683
Rv3801c	OTHER	0.005226	0.000214	0.001518	0.993043
Rv1842c	OTHER	0.386512	0.065886	0.037062	0.51054
Rv1275	LIPO(Sec/SPII)	0.003606	0.000396	0.995717	0.000281	CS pos: 20-21. LTG-CT. Pr: 0.9960
Rv1274	LIPO(Sec/SPII)	0.002606	0.000263	0.996928	0.000202	CS pos: 24-25. VAG-CS. Pr: 0.9975
Rv1277	OTHER	0.011268	0.006253	0.002561	0.979918
Rv0644c	OTHER	0.002299	0.000352	0.000751	0.996597
Rv1279	OTHER	0.031174	0.025328	0.014957	0.92854
Rv1278	OTHER	0.00535	0.000248	0.001757	0.992645
Rv2867c	OTHER	0.006055	0.000861	0.001101	0.991984
Rv0208c	OTHER	0.019365	0.01525	0.00538	0.960004
Rv0774c	TAT(Tat/SPI)	0.056717	0.922972	0.018581	0.00173	CS pos: 41-42. SHA-AP. Pr: 0.5047
Rv2070c	OTHER	0.042514	0.004033	0.006563	0.946889
Rv3800c	OTHER	0.004274	0.005005	0.000335	0.990386
Rv1403c	OTHER	0.011415	0.00575	0.001194	0.981641
Rv1260	OTHER	0.087109	0.008126	0.033339	0.871425
Rv2591	SP(Sec/SPI)	0.449862	0.254181	0.022632	0.273325	CS pos: 41-42. VLA-AG. Pr: 0.1008
Rv2590	OTHER	0.005958	0.001992	0.001123	0.990927
Rv3629c	OTHER	0.030715	0.002857	0.018401	0.948026
Rv1264	OTHER	0.004389	0.000694	0.000415	0.994502
Rv2595	OTHER	0.006158	0.000876	0.001261	0.991706
Rv1263	OTHER	0.004305	0.00385	0.002887	0.988959
Rv2597	OTHER	0.266643	0.012005	0.104021	0.617331
Rv0643c	OTHER	0.003113	0.000482	0.000487	0.995918
Rv1265	OTHER	0.008299	0.00663	0.00222	0.982851
Rv2596	OTHER	0.019687	0.00741	0.003684	0.96922
Rv2599	TAT(Tat/SPI)	0.360646	0.375143	0.107007	0.157203	CS pos: 34-35. VGS-YI. Pr: 0.2218
Rv0207c	OTHER	0.008313	0.002414	0.000849	0.988424
Rv2598	OTHER	0.214803	0.089841	0.031767	0.663588
Rv2868c	OTHER	0.128775	0.03981	0.020017	0.811399
Rv2735c	OTHER	0.008253	0.002634	0.001592	0.98752
Rv1840c	SP(Sec/SPI)	0.390728	0.222482	0.024325	0.362465	CS pos: 32-33. AAA-AV. Pr: 0.0766
Rv2071c	OTHER	0.024754	0.002392	0.005657	0.967197
Rv3099c	OTHER	0.014264	0.001132	0.002042	0.982563
Rv3032	OTHER	0.169538	0.018909	0.041771	0.769782
Rv3033	LIPO(Sec/SPII)	0.061979	0.018227	0.916945	0.002849	CS pos: 24-25. PTA-CS. Pr: 0.9139
Rv3030	OTHER	0.021811	0.004237	0.005635	0.968317
Rv3031	OTHER	0.014405	0.002351	0.002238	0.981005
Rv0202c	SP(Sec/SPI)	0.471948	0.016584	0.086047	0.425421	CS pos: 34-35. TQS-GN. Pr: 0.1243
Rv2732c	OTHER	0.025673	0.001549	0.0025	0.970278
Rv0335c	TAT(Tat/SPI)	0.210889	0.401527	0.048704	0.338881	CS pos: 31-32. VLA-RP. Pr: 0.2402
Rv3035	OTHER	0.072449	0.003783	0.126135	0.797632
Rv3098c	OTHER	0.018046	0.09489	0.018345	0.868719
Rv1667c	OTHER	0.007132	0.004525	0.000803	0.98754
Rv2733c	OTHER	0.060885	0.007831	0.01231	0.918973
Rv2601A	OTHER	0.011422	0.018806	0.002264	0.967509
Rv0201c	OTHER	0.009872	0.003301	0.001409	0.985417
Rv0773c	OTHER	0.138823	0.008106	0.010677	0.842395
Rv3097c	OTHER	0.337394	0.055582	0.03359	0.573434
Rv3627c	SP(Sec/SPI)	0.582731	0.140566	0.146162	0.130542	CS pos: 30-31. AAA-LV. Pr: 0.1131
Rv3098A	OTHER	0.288953	0.069227	0.016008	0.625811
Rv1668c	OTHER	0.010426	0.001172	0.001491	0.986911
Rv2996c	OTHER	0.015958	0.001214	0.002652	0.980177
Rv2427c	OTHER	0.00873	0.009857	0.002581	0.978832
Rv3013	OTHER	0.230524	0.019749	0.024642	0.725086
Rv0337c	OTHER	0.011177	0.001872	0.001479	0.985472
Rv0204c	OTHER	0.021352	0.000707	0.005544	0.972397
Rv3016	LIPO(Sec/SPII)	0.04354	0.006024	0.947568	0.002869	CS pos: 19-20. IAA-CT. Pr: 0.9483
Rv3626c	OTHER	0.015406	0.003458	0.00302	0.978115
Rv1532c	OTHER	0.003135	0.000657	0.00112	0.995089
Rv3759c	LIPO(Sec/SPII)	0.148707	0.001127	0.848988	0.001179	CS pos: 26-27. VAS-CA. Pr: 0.7897
Rv1229c	OTHER	0.014337	0.007072	0.002291	0.9763
Rv3000	OTHER	0.010311	0.010847	0.003266	0.975576
Rv3094c	OTHER	0.007436	0.007335	0.001487	0.983741
Rv2864c	LIPO(Sec/SPII)	0.00167	0.008853	0.988958	0.000519	CS pos: 24-25. MSG-CT. Pr: 0.9872
Rv3004	OTHER	0.320962	0.067488	0.027469	0.584081
Rv2998A	OTHER	0.008614	0.000841	0.001373	0.989172
[truncated: 2,034 more rows]

## Sheet: Mtu-SecretomeP
SecretomeP 2.0 Prediction for M. tuberculosis Secreted Proteins
Name\t	NN-score	Odds	Weighted
Rv3354	0.976	7.351	0.015
Rv1418	0.976	7.351	0.015
Rv3289c	0.974	7.351	0.015
Rv3739c	0.973	7.316	0.015
Rv0309	0.972	7.33	0.015
Rv1671	0.971	7.351	0.015
Rv2875	0.97	7.204	0.014
Rv0865	0.97	7.351	0.015
Rv1813c	0.969	7.351	0.015
Rv2046	0.967	7.254	0.015
Rv3090	0.966	1.445	0.003
Rv1619	0.965	7.293	0.015
Rv2330c	0.963	0.679	0.001
Rv0982	0.962	7.295	0.015
Rv1841c	0.961	7.278	0.015
Rv3016	0.96	1.748	0.003
Rv3238c	0.959	7.267	0.015
Rv1078	0.959	7.156	0.014
Rv0398c	0.959	7.286	0.015
Rv3036c	0.958	7.133	0.014
Rv0200	0.958	7.011	0.014
Rv0838	0.957	7.279	0.015
Rv1975	0.955	7.184	0.014
Rv0775	0.955	7.095	0.014
Rv3097c	0.953	6.827	0.014
Rv2307c	0.953	6.901	0.014
Rv2403c	0.952	2.916	0.006
Rv1684	0.952	7.011	0.014
Rv0559c	0.952	7.223	0.014
Rv0125	0.951	6.966	0.014
Rv0320	0.95	7.092	0.014
Rv2598	0.948	7.117	0.014
Rv3802c	0.946	2.71	0.005
Rv2873	0.945	6.805	0.014
Rv2200c	0.945	0.684	0.001
Rv0621	0.945	6.659	0.013
Rv2236c	0.944	6.97	0.014
Rv1252c	0.944	7.076	0.014
Rv1290A	0.943	6.813	0.014
Rv2717c	0.942	0.979	0.002
Rv1486c	0.942	6.96	0.014
Rv2389c	0.941	6.857	0.014
Rv1022	0.941	7.02	0.014
Rv3742c	0.94	1.489	0.003
Rv2434c	0.94	6.724	0.013
Rv1478	0.94	6.813	0.014
Rv1268c	0.94	6.587	0.013
Rv1150	0.94	6.816	0.014
Rv1791	0.939	6.92	0.014
Rv1404	0.939	6.805	0.014
Rv0583c	0.939	6.619	0.013
Rv3012c	0.938	6.688	0.013
Rv1891	0.938	6.516	0.013
Rv1291c	0.938	6.836	0.014
Rv0827c	0.938	6.684	0.013
Rv0477	0.938	6.688	0.013
Rv3572	0.937	3.147	0.006
Rv1788	0.937	2.966	0.006
Rv2360c	0.936	6.888	0.014
Rv1368	0.936	6.746	0.013
Rv0875c	0.936	6.72	0.013
Rv0240	0.936	6.928	0.014
Rv2636	0.935	6.755	0.014
Rv1003	0.935	6.718	0.013
Rv0835	0.935	6.511	0.013
Rv0617	0.935	6.593	0.013
Rv0257	0.935	6.96	0.014
Rv3337	0.934	6.651	0.013
Rv3216	0.934	2.165	0.004
Rv2983	0.934	6.639	0.013
Rv2432c	0.934	6.617	0.013
Rv2026c	0.933	6.709	0.013
Rv1103c	0.933	1.486	0.003
Rv0366c	0.933	6.732	0.013
Rv3882c	0.932	6.683	0.013
Rv1946c	0.932	6.896	0.014
Rv1927	0.932	6.663	0.013
Rv1069c	0.932	6.555	0.013
Rv3738c	0.931	3.337	0.007
Rv3584	0.931	6.486	0.013
Rv2289	0.931	6.643	0.013
Rv3804c	0.93	6.424	0.013
Rv0743c	0.93	6.691	0.013
Rv1974	0.929	6.482	0.013
Rv1146	0.929	0.583	0.001
Rv2738c	0.928	6.684	0.013
Rv0416	0.928	6.326	0.013
Rv3668c	0.927	0.524	0.001
Rv3390	0.927	6.383	0.013
Rv1646	0.927	6.46	0.013
Rv0703	0.927	6.524	0.013
Rv3298c	0.926	6.614	0.013
Rv3108	0.926	6.643	0.013
Rv2376c	0.926	6.364	0.013
Rv1616	0.926	6.429	0.013
Rv2274c	0.925	1.193	0.002
Rv2177c	0.925	6.545	0.013
Rv1712	0.925	6.393	0.013
Rv1275	0.925	6.439	0.013
Rv0929	0.925	6.546	0.013
Rv3022c	0.924	1.305	0.003
Rv1904	0.924	6.437	0.013
Rv1677	0.923	6.351	0.013
Rv0115	0.923	6.554	0.013
Rv2292c	0.922	6.423	0.013
Rv1304	0.922	6.486	0.013
Rv0344c	0.922	6.489	0.013
Rv3639c	0.921	3.432	0.007
Rv3426	0.921	6.474	0.013
Rv1488	0.921	6.317	0.013
Rv0518	0.921	6.45	0.013
Rv3489	0.92	6.361	0.013
Rv1752	0.92	6.426	0.013
Rv0671	0.92	6.282	0.013
Rv0326	0.92	6.45	0.013
Rv2270	0.919	6.348	0.013
Rv1087A	0.919	6.353	0.013
Rv0203	0.919	6.345	0.013
Rv3750c	0.918	6.351	0.013
Rv3492c	0.918	6.291	0.013
Rv2288	0.918	6.366	0.013
Rv1690	0.918	6.046	0.012
Rv0347	0.918	6.074	0.012
Rv3745c	0.917	1.641	0.003
Rv2361c	0.917	6.291	0.013
Rv0471c	0.917	6.272	0.013
Rv3136A	0.916	5.981	0.012
Rv0224c	0.916	6.221	0.012
Rv2923c	0.915	6.274	0.013
Rv0500A	0.915	6.229	0.012
Rv3687c	0.914	6.222	0.012
Rv2844	0.914	6.208	0.012
Rv3482c	0.913	6.004	0.012
Rv2903c	0.913	5.899	0.012
Rv2597	0.913	5.971	0.012
Rv2548	0.913	6.064	0.012
Rv2274A	0.913	6.122	0.012
Rv1419	0.913	6.006	0.012
Rv0506	0.913	5.963	0.012
Rv3163c	0.912	6.157	0.012
Rv0870c	0.912	6.032	0.012
Rv3310	0.911	5.962	0.012
Rv2879c	0.911	6.126	0.012
Rv1881c	0.911	6.145	0.012
Rv1700	0.911	6.117	0.012
Rv0788	0.911	0.741	0.001
Rv2418c	0.91	0.553	0.001
Rv3612c	0.909	6.05	0.012
Rv2290	0.909	6.09	0.012
Rv2253	0.909	5.949	0.012
Rv0626	0.909	5.915	0.012
Rv3770A	0.908	6.034	0.012
Rv3072c	0.908	5.876	0.012
Rv2700	0.908	5.742	0.011
Rv2307D	0.908	0.349	0.001
Rv0397A	0.908	5.817	0.012
Rv3271c	0.907	5.966	0.012
Rv1954c	0.907	5.955	0.012
Rv0371c	0.907	6.06	0.012
Rv0179c	0.907	5.844	0.012
Rv2010	0.906	5.959	0.012
Rv1953	0.906	5.924	0.012
Rv2784c	0.905	5.841	0.012
Rv1825	0.905	5.867	0.012
Rv1100	0.905	5.66	0.011
Rv0195	0.905	6.018	0.012
Rv3893c	0.904	3.119	0.006
Rv3705c	0.904	5.853	0.012
Rv1216c	0.904	5.825	0.012
Rv0968	0.904	5.802	0.012
Rv0734	0.904	5.745	0.011
Rv0448c	0.904	5.998	0.012
Rv0295c	0.904	5.897	0.012
Rv3279c	0.903	5.834	0.012
Rv2829c	0.903	5.94	0.012
Rv0122	0.903	5.84	0.012
Rv2961	0.902	5.775	0.012
Rv0098	0.902	5.807	0.012
Rv3717	0.901	5.756	0.012
Rv3631	0.901	5.921	0.012
Rv3110	0.901	5.79	0.012
Rv3017c	0.901	5.8	0.012
Rv3697c	0.9	2.505	0.005
Rv2952	0.9	5.832	0.012
Rv1918c	0.9	5.857	0.012
Rv1800	0.9	5.731	0.011
Rv0980c	0.9	5.832	0.012
Rv0546c	0.9	5.725	0.011
Rv3623	0.899	5.731	0.011
Rv1657	0.899	5.75	0.011
Rv1579c	0.899	5.744	0.011
Rv0997	0.899	5.854	0.012
Rv3920c	0.898	5.545	0.011
Rv3830c	0.898	5.669	0.011
Rv3343c	0.898	5.761	0.012
Rv2730	0.898	5.705	0.011
Rv1926c	0.898	5.684	0.011
Rv1602	0.898	5.681	0.011
Rv0944	0.898	5.672	0.011
Rv0314c	0.898	5.655	0.011
Rv2858c	0.897	5.659	0.011
Rv2498c	0.897	5.633	0.011
Rv1977	0.897	5.685	0.011
Rv1842c	0.897	5.634	0.011
Rv1555	0.897	5.692	0.011
Rv1314c	0.897	5.712	0.011
Rv0163	0.897	5.683	0.011
Rv2668	0.896	5.681	0.011
Rv2420c	0.896	5.653	0.011
Rv1261c	0.896	5.594	0.011
Rv1061	0.896	5.663	0.011
Rv1051c	0.896	5.594	0.011
Rv3624c	0.895	5.583	0.011
Rv3422c	0.895	5.539	0.011
Rv3300c	0.895	5.593	0.011
Rv2945c	0.895	5.639	0.011
Rv2556c	0.895	5.604	0.011
Rv2348c	0.895	5.483	0.011
Rv1233c	0.895	5.649	0.011
Rv0609	0.895	5.606	0.011
Rv0479c	0.895	5.527	0.011
Rv3759c	0.894	5.659	0.011
Rv2390c	0.894	5.665	0.011
Rv1032c	0.894	1.228	0.002
Rv3767c	0.893	5.537	0.011
Rv3591c	0.893	5.532	0.011
Rv2728c	0.893	5.607	0.011
Rv2656c	0.893	5.521	0.011
Rv1561	0.893	5.539	0.011
Rv1228	0.893	5.537	0.011
Rv0942	0.893	5.575	0.011
Rv2709	0.892	5.678	0.011
Rv1885c	0.892	5.457	0.011
Rv1831	0.892	5.572	0.011
Rv1002c	0.892	5.47	0.011
Rv2573	0.891	5.659	0.011
Rv2422	0.891	5.613	0.011
Rv1982c	0.891	5.561	0.011
Rv3752c	0.89	5.353	0.011
Rv2905	0.89	5.414	0.011
Rv2301	0.89	5.549	0.011
Rv2244	0.89	5.451	0.011
Rv1830	0.89	5.366	0.011
Rv1545	0.89	5.558	0.011
Rv3486	0.889	5.425	0.011
Rv3096	0.889	1.146	0.002
Rv2660c	0.889	5.45	0.011
Rv2358	0.889	5.483	0.011
Rv1898	0.889	5.21	0.01
Rv0151c	0.889	5.333	0.011
Rv3443c	0.888	5.339	0.011
Rv3172c	0.888	4.947	0.01
Rv2638	0.888	5.401	0.011
Rv1274	0.888	5.367	0.011
Rv0397	0.888	5.361	0.011
Rv0745	0.887	5.412	0.011
Rv3628	0.886	5.343	0.011
Rv2705c	0.886	5.332	0.011
Rv1892	0.886	5.362	0.011
Rv1857	0.886	5.337	0.011
Rv1528c	0.886	5.334	0.011
Rv1184c	0.886	5.323	0.011
Rv0735	0.886	5.329	0.011
Rv0160c	0.886	5.282	0.011
Rv3670	0.885	5.402	0.011
Rv3200c	0.885	5.173	0.01
Rv0716	0.885	5.205	0.01
Rv0677c	0.885	2.13	0.004
Rv1886c	0.884	5.164	0.01
Rv1601	0.884	5.204	0.01
Rv1443c	0.884	5.155	0.01
Rv0497	0.884	5.429	0.011
Rv2881c	0.883	5.226	0.01
Rv2409c	0.883	5.378	0.011
Rv1959c	0.883	5.274	0.011
Rv1954A	0.883	5.159	0.01
Rv1804c	0.883	5.301	0.011
Rv1670	0.883	5.189	0.01
Rv0948c	0.883	5.171	0.01
Rv0345	0.883	5.196	0.01
Rv3557c	0.882	5.182	0.01
Rv3425	0.882	5.136	0.01
Rv3006	0.882	5.057	0.01
Rv1352	0.882	5.228	0.01
Rv1031	0.882	5.134	0.01
Rv0828c	0.882	5.206	0.01
Rv0455c	0.882	5.2	0.01
Rv3554	0.881	5.152	0.01
Rv3026c	0.881	0.457	0.001
Rv2822c	0.881	5.135	0.01
Rv0622	0.881	5.469	0.011
Rv2451	0.88	5.173	0.01
Rv2099c	0.88	5.272	0.011
Rv1554	0.88	5.118	0.01
Rv1089	0.88	5.115	0.01
Rv1050	0.88	5.083	0.01
Rv3744	0.879	5.025	0.01
Rv2519	0.879	5.142	0.01
Rv2415c	0.879	5.163	0.01
Rv0638	0.879	5.289	0.011
Rv3922c	0.878	5.316	0.011
Rv2862A	0.878	5.187	0.01
Rv2760c	0.878	5.133	0.01
Rv2238c	0.878	4.288	0.009
Rv2234	0.878	5.136	0.01
Rv1740	0.878	5.025	0.01
Rv3412	0.877	5.345	0.011
Rv3247c	0.877	5.122	0.01
Rv2960c	0.877	4.967	0.01
Rv2919c	0.877	5.059	0.01
Rv2882c	0.877	4.997	0.01
Rv2494	0.877	5.098	0.01
Rv1994c	0.877	5.106	0.01
Rv1440	0.877	5.023	0.01
Rv0508	0.877	5.043	0.01
Rv0432	0.877	5.165	0.01
Rv0048c	0.877	5.159	0.01
Rv2359	0.876	5.095	0.01
Rv2232	0.876	5.033	0.01
Rv1899c	0.876	5.034	0.01
Rv0940c	0.876	5.213	0.01
Rv0463	0.876	5.032	0.01
Rv0300	0.876	5.029	0.01
Rv2617c	0.875	5.048	0.01
Rv1847	0.875	4.898	0.01
Rv2840c	0.874	4.981	0.01
Rv2063A	0.874	4.933	0.01
Rv1993c	0.874	4.976	0.01
Rv1911c	0.874	5.374	0.011
Rv1875	0.874	5.054	0.01
Rv1283c	0.874	4.869	0.01
Rv0683	0.874	5.034	0.01
Rv3192	0.873	5.115	0.01
Rv3173c	0.873	5.073	0.01
Rv3027c	0.873	4.957	0.01
Rv2438A	0.873	5.189	0.01
Rv1305	0.873	4.994	0.01
Rv3224B	0.872	5.071	0.01
Rv1645c	0.872	5.032	0.01
Rv0877	0.872	5.194	0.01
Rv0317c	0.872	4.815	0.01
Rv3245c	0.871	4.883	0.01
Rv3207c	0.871	5.035	0.01
Rv0978c	0.871	4.884	0.01
Rv0934	0.871	4.921	0.01
Rv0329c	0.871	4.953	0.01
Rv3872	0.87	0.988	0.002
Rv1583c	0.87	4.787	0.01
Rv0664	0.87	5.041	0.01
Rv2042c	0.869	4.751	0.01
Rv1430	0.869	4.912	0.01
Rv1190	0.869	5.024	0.01
Rv0804	0.869	5.056	0.01
Rv0378	0.869	4.989	0.01
Rv3897c	0.868	0.696	0.001
Rv3769	0.868	4.731	0.009
Rv3067	0.868	4.986	0.01
Rv2826c	0.868	4.816	0.01
Rv2526	0.868	5.351	0.011
Rv2327	0.868	5.089	0.01
Rv2307A	0.868	4.834	0.01
Rv1246c	0.868	4.699	0.009
Rv3849	0.867	4.489	0.009
Rv3583c	0.867	4.868	0.01
Rv2998	0.867	4.859	0.01
Rv2195	0.867	4.744	0.009
Rv2051c	0.867	4.953	0.01
Rv3853	0.866	4.928	0.01
Rv3284	0.866	4.962	0.01
Rv0603	0.866	4.904	0.01
Rv3355c	0.865	4.626	0.009
Rv2766c	0.865	4.908	0.01
Rv1147	0.865	4.769	0.01
Rv1114	0.865	4.736	0.009
Rv0411c	0.865	4.823	0.01
Rv0262c	0.865	4.724	0.009
Rv0689c	0.864	4.821	0.01
Rv0175	0.864	4.836	0.01
Rv0027	0.864	4.827	0.01
Rv3620c	0.863	4.84	0.01
Rv3597c	0.863	2.064	0.004
Rv3182	0.863	4.872	0.01
Rv2231A	0.863	4.562	0.009
Rv1744c	0.863	4.714	0.009
Rv3594	0.862	4.769	0.01
Rv3243c	0.862	4.804	0.01
Rv2375	0.862	4.702	0.009
Rv1874	0.862	4.826	0.01
Rv1116A	0.862	4.816	0.01
Rv0239	0.862	4.543	0.009
Rv3092c	0.861	0.878	0.002
Rv2484c	0.861	4.557	0.009
Rv1379	0.861	4.559	0.009
Rv3120	0.86	4.738	0.009
Rv1397c	0.86	4.641	0.009
Rv1036c	0.86	0.471	0.001
Rv0490	0.86	4.524	0.009
Rv0247c	0.86	4.598	0.009
Rv0159c	0.86	4.649	0.009
Rv3357	0.859	4.465	0.009
Rv3315c	0.859	4.653	0.009
Rv1365c	0.859	4.638	0.009
Rv1362c	0.859	4.473	0.009
Rv1055	0.859	4.848	0.01
Rv0962c	0.859	4.62	0.009
Rv3491	0.858	4.606	0.009
Rv2758c	0.858	4.638	0.009
Rv1509	0.858	4.615	0.009
Rv0889c	0.858	4.98	0.01
Rv2929	0.857	4.619	0.009
Rv2785c	0.857	4.923	0.01
Rv2742c	0.857	1.325	0.003
Rv2194	0.857	4.853	0.01
Rv1431	0.857	4.535	0.009
Rv1250	0.857	4.399	0.009
Rv0146	0.857	4.502	0.009
Rv3861	0.856	4.529	0.009
Rv3452	0.856	4.781	0.01
Rv3178	0.856	4.653	0.009
Rv3176c	0.856	0.799	0.002
Rv3134c	0.856	4.503	0.009
Rv1532c	0.856	4.415	0.009
Rv0445c	0.856	4.529	0.009
Rv2782c	0.855	4.418	0.009
Rv2674	0.855	4.409	0.009
Rv1973	0.855	4.433	0.009
Rv1941	0.855	4.765	0.01
Rv1126c	0.855	4.753	0.01
Rv0718	0.855	4.756	0.01
Rv3904c	0.854	4.608	0.009
Rv3746c	0.854	4.556	0.009
Rv3619c	0.854	0.607	0.001
Rv2776c	0.854	4.454	0.009
Rv2022c	0.854	1.995	0.004
Rv1176c	0.854	4.373	0.009
Rv1090	0.854	4.362	0.009
Rv1037c	0.854	4.638	0.009
Rv0758	0.854	4.709	0.009
Rv0627	0.854	4.837	0.01
Rv3420c	0.853	4.333	0.009
Rv2949c	0.853	4.441	0.009
Rv2452c	0.853	3.017	0.006
Rv1667c	0.853	4.307	0.009
Rv1487	0.853	4.439	0.009
Rv1322A	0.853	4.738	0.009
Rv0749A	0.853	4.518	0.009
Rv0539	0.853	4.785	0.01
Rv0381c	0.853	4.362	0.009
Rv3726	0.852	4.341	0.009
Rv3566A	0.852	4.53	0.009
Rv3076	0.852	4.343	0.009
Rv2851c	0.852	4.644	0.009
Rv1815	0.852	4.458	0.009
Rv1489A	0.852	4.496	0.009
Rv1049	0.852	4.423	0.009
Rv2003c	0.851	4.313	0.009
Rv0941c	0.851	4.346	0.009
Rv0593	0.851	4.465	0.009
Rv3643	0.85	4.358	0.009
Rv3082c	0.85	4.396	0.009
Rv3005c	0.85	4.373	0.009
Rv1581c	0.85	4.487	0.009
Rv0717	0.85	4.359	0.009
Rv3764c	0.849	4.457	0.009
Rv2069	0.849	4.755	0.01
Rv1409	0.849	4.509	0.009
Rv1038c	0.849	4.53	0.009
Rv0078B	0.849	4.253	0.009
Rv3637	0.848	4.248	0.008
Rv1792	0.848	4.509	0.009
Rv1349	0.848	4.312	0.009
Rv1197	0.848	4.529	0.009
Rv1035c	0.848	4.303	0.009
Rv0700	0.848	4.169	0.008
Rv0580c	0.848	4.359	0.009
Rv3862c	0.847	4.293	0.009
Rv3832c	0.847	4.583	0.009
Rv3395c	0.847	4.51	0.009
Rv2371	0.847	4.51	0.009
Rv2277c	0.847	4.207	0.008
Rv2179c	0.847	4.294	0.009
Rv1922	0.847	4.357	0.009
Rv0858c	0.847	4.42	0.009
Rv3675	0.846	4.472	0.009
Rv2793c	0.846	4.625	0.009
Rv0885	0.846	4.155	0.008
Rv0774c	0.846	4.448	0.009
Rv0437c	0.846	4.383	0.009
Rv0178	0.846	4.649	0.009
Rv3803c	0.845	0.46	0.001
Rv3440c	0.845	4.232	0.008
Rv2353c	0.845	2.442	0.005
Rv2293c	0.845	4.078	0.008
Rv1423	0.845	4.35	0.009
Rv3322c	0.844	4.387	0.009
Rv2999	0.844	4.386	0.009
Rv2799	0.844	4.287	0.009
Rv1239c	0.844	4.76	0.01
Rv1132	0.844	4.12	0.008
Rv1059	0.844	4.123	0.008
Rv1016c	0.844	3.084	0.006
Rv2036	0.843	4.104	0.008
Rv1931c	0.843	4.178	0.008
Rv1541c	0.843	4.052	0.008
Rv1096	0.843	1.143	0.002
Rv0850	0.843	4.208	0.008
Rv0665	0.843	4.247	0.008
Rv0616A	0.843	4.178	0.008
Rv0071	0.843	4.135	0.008
Rv3209	0.842	4.199	0.008
Rv2898c	0.842	4.309	0.009
Rv2745c	0.842	1.839	0.004
Rv2080	0.842	4.578	0.009
Rv1971	0.842	4.05	0.008
Rv1897c	0.842	4.41	0.009
Rv0919	0.842	4.218	0.008
Rv3338	0.841	4.248	0.008
Rv2063	0.841	4.266	0.009
Rv1706A	0.841	4.614	0.009
Rv0709	0.841	4.138	0.008
Rv0076c	0.841	4.736	0.009
Rv3870	0.84	4.159	0.008
Rv3725	0.84	4.183	0.008
Rv2258c	0.84	4.028	0.008
Rv1034c	0.84	3.991	0.008
Rv0802c	0.84	4.158	0.008
Rv0793	0.84	4.269	0.009
Rv0186A	0.84	3.994	0.008
Rv3763	0.839	4.074	0.008
Rv3222c	0.839	4.099	0.008
Rv2267c	0.839	4.208	0.008
Rv0608	0.839	4.262	0.009
Rv3473c	0.838	0.792	0.002
Rv3353c	0.838	4.438	0.009
Rv3287c	0.838	4.067	0.008
Rv3022A	0.838	4.75	0.009
Rv2781c	0.838	4.284	0.009
Rv2654c	0.838	4.123	0.008
Rv2306B	0.838	4.353	0.009
Rv1682	0.838	4.146	0.008
Rv1134	0.838	4.088	0.008
Rv0679c	0.838	4.045	0.008
Rv0673	0.838	4.292	0.009
Rv0456A	0.838	3.963	0.008
Rv0313	0.838	4.006	0.008
Rv0288	0.838	4.173	0.008
Rv2966c	0.837	4.363	0.009
Rv2901c	0.837	3.962	0.008
Rv2671	0.837	4.406	0.009
Rv0451c	0.837	4.505	0.009
Rv0415	0.837	2.376	0.005
Rv3539	0.836	3.97	0.008
Rv1943c	0.836	3.907	0.008
Rv1724c	0.836	2.24	0.004
Rv1025	0.836	4.353	0.009
Rv1009	0.836	4.207	0.008
Rv0633c	0.836	4.481	0.009
Rv0150c	0.836	4.271	0.009
Rv3601c	0.835	3.623	0.007
Rv2906c	0.835	4.141	0.008
Rv2796c	0.835	3.918	0.008
Rv2625c	0.835	4.39	0.009
Rv2439c	0.835	1.036	0.002
Rv2342	0.835	3.933	0.008
Rv2297	0.835	3.98	0.008
Rv1912c	0.835	3.853	0.008
Rv1235	0.835	3.987	0.008
Rv3875	0.834	4.182	0.008
Rv3736	0.834	4.006	0.008
Rv3428c	0.834	4.407	0.009
Rv2706c	0.834	4.086	0.008
Rv2298	0.834	3.928	0.008
Rv2075c	0.834	3.85	0.008
Rv1610	0.834	4.216	0.008
Rv1426c	0.834	4.056	0.008
Rv0731c	0.834	4.016	0.008
Rv0514	0.834	4.28	0.009
Rv2628	0.833	3.92	0.008
Rv2532c	0.833	4.419	0.009
Rv2231B	0.833	3.894	0.008
Rv1606	0.833	0.55	0.001
Rv0847	0.833	4.362	0.009
Rv0657c	0.833	3.828	0.008
Rv0420c	0.833	4.697	0.009
Rv3678c	0.832	5.15	0.01
Rv2887	0.832	3.962	0.008
Rv2269c	0.832	4.287	0.009
Rv2199c	0.832	5.247	0.01
Rv1984c	0.832	4.098	0.008
Rv1525	0.832	4.056	0.008
Rv1347c	0.832	3.864	0.008
Rv1063c	0.832	3.512	0.007
Rv0426c	0.832	3.952	0.008
Rv0259c	0.832	3.952	0.008
Rv3363c	0.831	3.948	0.008
Rv3196A	0.831	4.204	0.008
Rv2972c	0.831	4.168	0.008
Rv2653c	0.831	3.993	0.008
Rv2107	0.831	4.712	0.009
Rv3874	0.83	4.051	0.008
Rv2481c	0.83	3.911	0.008
Rv1967	0.83	4.043	0.008
Rv1652	0.83	4.03	0.008
Rv1417	0.83	3.908	0.008
Rv1269c	0.83	4.146	0.008
Rv0722	0.83	3.84	0.008
Rv0302	0.83	3.994	0.008
Rv3812	0.829	2.411	0.005
Rv3259	0.829	3.942	0.008
Rv2864c	0.829	3.857	0.008
Rv1929c	0.829	3.839	0.008
Rv1693	0.829	4.218	0.008
Rv1157c	0.829	3.956	0.008
Rv0619	0.829	3.857	0.008
Rv3674c	0.828	3.927	0.008
Rv2939	0.828	3.72	0.007
Rv2089c	0.828	4.027	0.008
Rv2060	0.828	0.79	0.002
Rv1947	0.828	3.88	0.008
Rv1580c	0.828	3.86	0.008
Rv1249c	0.828	3.993	0.008
Rv0093c	0.828	4.182	0.008
Rv3747	0.827	3.909	0.008
Rv3330	0.827	3.96	0.008
Rv1481	0.827	3.967	0.008
Rv1223	0.827	4.016	0.008
Rv1174c	0.827	4.06	0.008
Rv1105	0.827	3.854	0.008
Rv0692	0.827	3.968	0.008
Rv0031	0.827	3.864	0.008
Rv3792	0.826	0.598	0.001
Rv3719	0.826	4.33	0.009
Rv3684	0.826	3.874	0.008
Rv2991	0.826	3.795	0.008
Rv2146c	0.826	3.859	0.008
Rv2056c	0.826	4.077	0.008
Rv1998c	0.826	3.96	0.008
Rv1917c	0.826	4.311	0.009
Rv0388c	0.826	3.946	0.008
Rv0265c	0.826	4.062	0.008
Rv3424c	0.825	3.638	0.007
Rv3317	0.825	4.642	0.009
Rv2828A	0.825	3.697	0.007
Rv2111c	0.825	1.425	0.003
Rv1065	0.825	3.74	0.007
Rv0534c	0.825	4.024	0.008
Rv0526	0.825	3.793	0.008
Rv2283	0.824	4.076	0.008
Rv2078	0.824	4.227	0.008
Rv1010	0.824	3.82	0.008
Rv3346c	0.823	4.143	0.008
Rv2708c	0.823	3.669	0.007
Rv2676c	0.823	3.766	0.008
Rv2657c	0.823	3.603	0.007
Rv2272	0.823	4.608	0.009
Rv1980c	0.823	3.695	0.007
Rv1826	0.823	3.781	0.008
Rv0899	0.823	4.162	0.008
Rv3129	0.822	3.684	0.007
Rv2091c	0.822	4.232	0.008
Rv2316	0.821	3.72	0.007
Rv1507A	0.821	3.583	0.007
Rv1503c	0.821	3.616	0.007
Rv1116	0.821	4.47	0.009
Rv1033c	0.821	3.678	0.007
Rv0903c	0.821	3.658	0.007
Rv0857	0.821	3.979	0.008
Rv0695	0.821	4.018	0.008
Rv1403c	0.82	4.08	0.008
Rv1344	0.82	4.419	0.009
Rv1123c	0.82	0.76	0.002
Rv1088	0.82	4.521	0.009
Rv3126c	0.819	3.974	0.008
Rv0595c	0.819	4.227	0.008
Rv0021c	0.819	4.034	0.008
Rv1466	0.818	4.361	0.009
Rv0406c	0.818	3.938	0.008
Rv2842c	0.817	3.765	0.008
Rv2746c	0.817	1.191	0.002
Rv0763c	0.817	3.488	0.007
Rv3524	0.816	4.049	0.008
Rv1549	0.816	3.651	0.007
Rv1139c	0.816	4.464	0.009
Rv0555	0.816	3.775	0.008
Rv0065	0.816	4.018	0.008
Rv3550	0.815	3.453	0.007
Rv2754c	0.815	3.875	0.008
Rv2365c	0.815	3.523	0.007
Rv1054	0.815	3.649	0.007
Rv0715	0.815	3.567	0.007
Rv0590A	0.815	3.606	0.007
Rv0187	0.815	3.817	0.008
Rv3847	0.814	3.488	0.007
Rv1914c	0.814	3.744	0.007
Rv1834	0.814	3.745	0.007
Rv0817c	0.814	3.997	0.008
Rv0604	0.814	3.589	0.007
Rv0520	0.814	3.494	0.007
Rv3845	0.813	0.217	0
Rv2944	0.813	3.92	0.008
Rv2262c	0.813	3.908	0.008
Rv2073c	0.813	3.822	0.008
Rv1698	0.813	4.623	0.009
Rv1669	0.813	4.311	0.009
Rv0105c	0.813	4.399	0.009
Rv3360	0.812	3.506	0.007
Rv3273	0.812	3.676	0.007
Rv2085	0.812	3.527	0.007
Rv1939	0.812	3.535	0.007
Rv0769	0.812	3.867	0.008
Rv0519c	0.812	4.045	0.008
Rv0470A	0.812	3.604	0.007
Rv2601	0.811	4.191	0.008
Rv2145c	0.811	3.779	0.008
Rv2140c	0.811	0.607	0.001
Rv1109c	0.811	3.516	0.007
Rv0932c	0.811	3.508	0.007
Rv0911	0.811	3.358	0.007
Rv0080	0.811	3.627	0.007
Rv3912	0.81	3.385	0.007
Rv3613c	0.81	2.595	0.005
Rv3458c	0.81	3.527	0.007
Rv1272c	0.81	3.638	0.007
Rv0960	0.81	3.583	0.007
Rv3923c	0.809	3.575	0.007
Rv2384	0.809	3.413	0.007
Rv1129c	0.809	2.279	0.005
Rv0024	0.809	3.507	0.007
Rv3525c	0.808	3.394	0.007
Rv2237A	0.808	3.639	0.007
Rv2138	0.808	3.53	0.007
Rv1753c	0.808	3.908	0.008
Rv0523c	0.808	3.429	0.007
Rv0123	0.808	4.034	0.008
Rv3246c	0.807	3.571	0.007
Rv2517c	0.807	3.945	0.008
Rv1907c	0.807	3.923	0.008
Rv0992c	0.807	4.038	0.008
Rv0698	0.807	2.694	0.005
Rv0582	0.807	3.791	0.008
Rv3316	0.806	0.608	0.001
Rv1107c	0.806	2.074	0.004
Rv0361	0.806	4.628	0.009
Rv2757c	0.805	3.571	0.007
Rv2496c	0.805	3.462	0.007
Rv2553c	0.804	0.699	0.001
Rv1508A	0.804	3.342	0.007
Rv1137c	0.804	3.285	0.007
Rv3691	0.803	3.773	0.008
Rv3188	0.803	3.71	0.007
Rv3046c	0.803	3.628	0.007
Rv3044	0.803	0.661	0.001
Rv2614A	0.803	3.918	0.008
Rv1265	0.803	3.514	0.007
Rv0691c	0.803	3.344	0.007
Rv2662	0.802	4.26	0.009
Rv1988	0.802	3.629	0.007
Rv1444c	0.802	3.288	0.007
Rv0984	0.802	3.694	0.007
Rv0848	0.802	3.6	0.007
Rv2151c	0.801	2.073	0.004
Rv2037c	0.801	3.521	0.007
Rv0484c	0.801	3.598	0.007
Rv3588c	0.8	1.585	0.003
Rv2866	0.8	3.731	0.007
Rv1956	0.8	3.214	0.006
Rv0121c	0.8	3.526	0.007
Rv2838c	0.799	3.384	0.007
Rv2548A	0.799	3.402	0.007
Rv2450c	0.799	2.495	0.005
Rv2149c	0.799	3.47	0.007
Rv1638A	0.799	3.478	0.007
Rv1608c	0.799	3.38	0.007
Rv0674	0.799	3.171	0.006
Rv3686c	0.798	3.571	0.007
Rv3669	0.798	3.938	0.008
Rv3644c	0.798	1.054	0.002
Rv3204	0.798	3.594	0.007
Rv3131	0.798	3.169	0.006
Rv3047c	0.798	3.275	0.007
Rv2751	0.798	3.448	0.007
Rv2469c	0.798	3.274	0.007
Rv0368c	0.798	3.397	0.007
Rv0196	0.798	3.394	0.007
Rv3681c	0.797	3.71	0.007
Rv3657c	0.797	3.757	0.008
Rv1412	0.797	3.391	0.007
Rv0042c	0.797	3.183	0.006
Rv3919c	0.796	3.25	0.006
Rv2087	0.796	3.503	0.007
Rv1584c	0.796	3.817	0.008
Rv0888	0.796	3.24	0.006
Rv0759c	0.796	3.508	0.007
Rv0632c	0.796	3.386	0.007
Rv0185	0.796	3.158	0.006
Rv2475c	0.795	3.362	0.007
Rv2407	0.795	3.342	0.007
Rv1950c	0.795	3.618	0.007
Rv1335	0.795	3.894	0.008
Rv0478	0.795	3.296	0.007
Rv3910	0.794	3.313	0.007
Rv3451	0.794	3.864	0.008
Rv3106	0.794	3.322	0.007
Rv2922A	0.794	3.421	0.007
Rv2341	0.794	3.263	0.007
Rv1991c	0.794	3.273	0.007
Rv1895	0.794	3.111	0.006
Rv1209	0.794	3.314	0.007
Rv0749	0.794	3.277	0.007
Rv0708	0.794	3.174	0.006
Rv0304c	0.794	4.357	0.009
Rv0034	0.794	3.241	0.006
Rv3324A	0.793	3.533	0.007
Rv3135	0.793	3.308	0.007
Rv2762c	0.793	3.832	0.008
Rv2734	0.793	3.341	0.007
Rv2683	0.793	3.376	0.007
Rv2651c	0.793	3.278	0.007
Rv0666	0.793	3.462	0.007
Rv0055	0.793	3.655	0.007
Rv3190A	0.792	3.524	0.007
Rv2640c	0.792	3.372	0.007
Rv2377c	0.792	6.468	0.013
Rv1754c	0.792	4.074	0.008
Rv1334	0.792	3.268	0.007
Rv1280c	0.792	3.223	0.006
Rv0656c	0.792	3.268	0.007
Rv3671c	0.791	3.547	0.007
Rv3281	0.791	3.263	0.007
Rv2412	0.791	3.26	0.007
Rv1244	0.791	3.038	0.006
Rv0634A	0.791	3.21	0.006
Rv0241c	0.791	3.089	0.006
Rv0023	0.791	3.247	0.006
Rv3533c	0.79	3.819	0.008
Rv3527	0.79	3.208	0.006
Rv2970c	0.79	3.114	0.006
Rv2028c	0.79	3.171	0.006
Rv1932	0.79	3.153	0.006
Rv1728c	0.79	3.047	0.006
Rv1374c	0.79	3.125	0.006
Rv3576	0.789	3.047	0.006
Rv3352c	0.789	3.548	0.007
Rv1799	0.789	3.497	0.007
Rv1498c	0.789	3.335	0.007
Rv1322	0.789	3.645	0.007
Rv1029	0.789	3.305	0.007
Rv0699	0.789	3.078	0.006
Rv3320c	0.788	3.298	0.007
Rv2248	0.788	3.163	0.006
Rv1282c	0.788	3.126	0.006
Rv3905c	0.787	2.97	0.006
Rv1236	0.787	3.158	0.006
Rv0525	0.787	3.423	0.007
Rv3826	0.786	3.111	0.006
Rv3066	0.786	0.86	0.002
Rv2312	0.786	3.79	0.008
Rv2239c	0.786	3.236	0.006
Rv2096c	0.786	3.056	0.006
Rv2057c	0.786	3.688	0.007
Rv1853	0.786	3.279	0.007
Rv3666c	0.785	2.974	0.006
Rv3019c	0.785	3.138	0.006
Rv2595	0.785	3.612	0.007
Rv0918	0.785	1.837	0.004
Rv0413	0.785	3.41	0.007
Rv3547	0.784	3.446	0.007
Rv3488	0.784	3.833	0.008
Rv3142c	0.784	3.07	0.006
Rv3099c	0.784	0.595	0.001
Rv2775	0.784	3.216	0.006
Rv1811	0.784	3.618	0.007
Rv0701	0.784	3.105	0.006
Rv0634B	0.784	3.725	0.007
Rv3069	0.783	3.197	0.006
Rv2970A	0.783	2.983	0.006
Rv2779c	0.783	3.037	0.006
Rv2385	0.783	3.011	0.006
Rv0659c	0.783	2.951	0.006
Rv0298	0.783	3.391	0.007
Rv0208c	0.783	2.933	0.006
Rv3869	0.782	3.256	0.007
Rv2699c	0.782	3.273	0.007
Rv2546	0.782	3.459	0.007
Rv1658	0.782	3.036	0.006
Rv1617	0.782	3.063	0.006
Rv1433	0.782	3.494	0.007
Rv1008	0.782	2.994	0.006
Rv0637	0.782	3.276	0.007
Rv0616c	0.782	3.08	0.006
Rv3474	0.781	3.337	0.007
Rv3468c	0.781	3.515	0.007
Rv3381c	0.781	3.337	0.007
Rv3325	0.781	3.337	0.007
Rv3186	0.781	3.337	0.007
Rv3184	0.781	3.337	0.007
Rv2815c	0.781	3.337	0.007
Rv2648	0.781	3.337	0.007
Rv2480c	0.781	6.832	0.014
Rv2354	0.781	3.337	0.007
Rv2278	0.781	3.337	0.007
Rv2189c	0.781	2.942	0.006
Rv2168c	0.781	3.337	0.007
Rv2105	0.781	4.631	0.009
Rv1832	0.781	2.99	0.006
Rv1763	0.781	3.337	0.007
Rv1757c	0.781	3.337	0.007
Rv1370c	0.781	3.337	0.007
Rv1225c	0.781	2.982	0.006
Rv1000c	0.781	3.15	0.006
Rv0893c	0.781	3.063	0.006
Rv0795	0.781	3.337	0.007
Rv0035	0.781	2.929	0.006
Rv3463	0.78	3.297	0.007
Rv3435c	0.78	3.527	0.007
Rv2263	0.78	2.963	0.006
Rv1574	0.78	2.93	0.006
Rv0998	0.78	1.138	0.002
Rv2511	0.779	3.398	0.007
Rv1624c	0.779	3.922	0.008
Rv0584	0.779	2.889	0.006
Rv0045c	0.779	7.014	0.014
Rv2811	0.778	2.972	0.006
Rv0678	0.778	2.902	0.006
Rv0658c	0.778	2.933	0.006
Rv3896c	0.777	0.794	0.002
Rv1770	0.777	2.97	0.006
Rv1596	0.777	1.107	0.002
Rv1169c	0.777	3.014	0.006
Rv0283	0.777	3.232	0.006
Rv3697A	0.776	3.364	0.007
Rv3008	0.776	2.857	0.006
Rv2187	0.776	2.894	0.006
Rv1723	0.776	2.821	0.006
Rv1357c	0.776	3.091	0.006
Rv1125	0.776	2.818	0.006
Rv0733	0.776	2.965	0.006
Rv0355c	0.776	3.907	0.008
Rv0310c	0.776	3.1	0.006
Rv2688c	0.775	3.219	0.006
Rv2347c	0.775	3.206	0.006
Rv2321c	0.775	1.786	0.004
Rv1341	0.775	2.87	0.006
Rv0174	0.775	2.835	0.006
Rv2543	0.774	3.158	0.006
Rv0558	0.774	3.035	0.006
Rv3856c	0.773	0.956	0.002
Rv3714c	0.773	0.761	0.002
Rv2985	0.773	3.008	0.006
Rv2647	0.773	2.841	0.006
Rv2323c	0.773	3.124	0.006
Rv2309A	0.773	2.826	0.006
Rv1771	0.773	3.041	0.006
Rv1180	0.773	2.906	0.006
Rv1159A	0.773	3.113	0.006
Rv0825c	0.773	2.898	0.006
Rv0606	0.773	3.247	0.006
Rv3199c	0.772	2.942	0.006
Rv2453c	0.772	0.747	0.001
Rv0947c	0.772	3.272	0.007
Rv0176	0.772	3.46	0.007
Rv0047c	0.772	1.571	0.003
Rv3546	0.771	0.693	0.001
Rv3477	0.771	3.183	0.006
Rv3165c	0.771	2.833	0.006
Rv2406c	0.771	3.314	0.007
Rv1889c	0.771	3.26	0.007
Rv3288c	0.77	3.254	0.007
Rv2592c	0.77	0.978	0.002
Rv2171	0.77	3.321	0.007
Rv1260	0.77	2.865	0.006
Rv1086	0.77	2.991	0.006
Rv0880	0.77	2.929	0.006
Rv3914	0.769	3.047	0.006
Rv3073c	0.769	3.159	0.006
Rv2804c	0.769	2.73	0.005
Rv2427A	0.769	3.305	0.007
Rv1921c	0.769	2.728	0.005
Rv0464c	0.769	3.397	0.007
Rv3819	0.768	3.111	0.006
Rv3796	0.768	3.119	0.006
Rv2619c	0.768	3.024	0.006
Rv2186c	0.768	2.906	0.006
Rv1883c	0.768	3.073	0.006
Rv0550c	0.768	2.841	0.006
Rv3662c	0.767	1.24	0.002
Rv2679	0.767	2.78	0.006
Rv2547	0.767	2.804	0.006
Rv2325c	0.767	2.631	0.005
Rv2034	0.767	2.894	0.006
Rv1976c	0.767	2.841	0.006
Rv1685c	0.767	2.841	0.006
Rv0754	0.767	4.11	0.008
Rv2540c	0.766	6.915	0.014
Rv2160c	0.766	2.685	0.005
Rv1262c	0.766	2.969	0.006
Rv0912	0.766	2.844	0.006
Rv3770B	0.765	3.39	0.007
Rv3438	0.765	2.805	0.006
Rv2908c	0.765	2.8	0.006
Rv2217	0.765	3.008	0.006
Rv2041c	0.765	2.046	0.004
Rv1390	0.765	2.707	0.005
Rv0928	0.765	2.955	0.006
Rv2284	0.764	2.953	0.006
Rv1210	0.764	3.654	0.007
Rv0813c	0.764	3.045	0.006
Rv0624	0.764	2.894	0.006
Rv3899c	0.763	2.998	0.006
Rv3235	0.763	2.671	0.005
Rv2206	0.763	3.086	0.006
Rv1270c	0.763	2.831	0.006
Rv1060	0.763	2.884	0.006
Rv2351c	0.762	3.411	0.007
Rv2043c	0.762	1.988	0.004
Rv1905c	0.762	2.808	0.006
Rv0866	0.762	2.712	0.005
Rv3748	0.761	2.654	0.005
Rv2055c	0.761	2.754	0.006
Rv1819c	0.761	3.526	0.007
Rv1668c	0.761	2.981	0.006
Rv0116c	0.761	0.906	0.002
Rv3635	0.76	2.925	0.006
Rv3233c	0.76	2.567	0.005
Rv3198A	0.76	2.986	0.006
Rv3154	0.76	3.007	0.006
Rv1827	0.76	2.991	0.006
Rv1388	0.76	2.861	0.006
Rv0898c	0.76	3.446	0.007
Rv0755A	0.76	3.055	0.006
Rv0564c	0.76	2.7	0.005
Rv3558	0.759	3.471	0.007
Rv1548c	0.759	1.264	0.003
Rv1372	0.759	2.698	0.005
Rv1117	0.759	3.058	0.006
Rv3909	0.758	2.622	0.005
Rv3891c	0.758	2.619	0.005
Rv3159c	0.758	3.539	0.007
Rv2492	0.758	2.784	0.006
Rv1540	0.758	2.968	0.006
Rv1435c	0.758	3.311	0.007
Rv3733c	0.757	2.912	0.006
Rv3609c	0.757	2.733	0.005
Rv3416	0.757	2.897	0.006
Rv2759c	0.757	1.964	0.004
Rv2737A	0.757	3.192	0.006
Rv2356c	0.757	3.746	0.007
Rv2271	0.757	3.083	0.006
Rv3221A	0.756	2.602	0.005
Rv1506c	0.756	2.778	0.006
Rv0358	0.756	2.526	0.005
Rv0316	0.756	2.786	0.006
Rv3611	0.755	2.995	0.006
Rv2894c	0.755	1.339	0.003
Rv2053c	0.755	3.74	0.007
Rv1720c	0.755	3.08	0.006
Rv1186c	0.755	2.73	0.005
Rv0500	0.755	2.649	0.005
Rv0399c	0.755	2.603	0.005
Rv0131c	0.755	2.867	0.006
Rv3754	0.754	2.701	0.005
Rv3121	0.754	2.552	0.005
Rv2998A	0.754	2.638	0.005
Rv2554c	0.754	2.566	0.005
Rv1888A	0.754	2.766	0.006
Rv1767	0.754	2.844	0.006
Rv0829	0.754	2.823	0.006
Rv0349	0.754	3.163	0.006
Rv0237	0.754	3.038	0.006
Rv3791	0.753	2.828	0.006
Rv2223c	0.753	1.499	0.003
Rv2023c	0.753	2.613	0.005
Rv1721c	0.753	3.115	0.006
Rv0961	0.753	3.338	0.007
Rv0736	0.753	3.614	0.007
Rv3843c	0.752	7.098	0.014
Rv3755c	0.752	2.866	0.006
Rv3711c	0.752	2.854	0.006
Rv2635	0.752	2.731	0.005
Rv2002	0.752	2.586	0.005
Rv1395	0.752	2.638	0.005
Rv1140	0.752	3.397	0.007
Rv0930	0.752	2.958	0.006
Rv0190	0.752	3.114	0.006
Rv3227	0.751	2.753	0.006
Rv1398c	0.751	2.814	0.006
Rv0839	0.751	2.577	0.005
Rv0728c	0.751	2.534	0.005
Rv2337c	0.75	2.614	0.005
Rv1124	0.75	2.842	0.006
Rv3765c	0.749	4.145	0.008
Rv3707c	0.749	2.501	0.005
Rv2816c	0.749	2.754	0.006
Rv2464c	0.749	2.655	0.005
Rv2260	0.749	2.495	0.005
Rv2202c	0.749	1.208	0.002
Rv1942c	0.749	2.638	0.005
Rv0039c	0.749	2.771	0.006
Rv3610c	0.748	6.959	0.014
Rv2835c	0.748	2.53	0.005
Rv2350c	0.748	2.443	0.005
Rv2911	0.747	2.554	0.005
Rv2609c	0.747	2.521	0.005
Rv2394	0.747	2.596	0.005
Rv2174	0.747	2.841	0.006
Rv1734c	0.747	2.808	0.006
Rv1990c	0.746	2.87	0.006
Rv1890c	0.746	2.596	0.005
Rv1848	0.746	2.499	0.005
Rv1106c	0.746	2.622	0.005
Rv0444c	0.746	2.501	0.005
Rv0132c	0.746	2.474	0.005
Rv0025	0.746	2.709	0.005
Rv3676	0.745	2.425	0.005
Rv3485c	0.745	0.597	0.001
Rv2833c	0.745	2.75	0.006
Rv2702	0.745	2.564	0.005
Rv0340	0.745	2.478	0.005
Rv1751	0.744	2.595	0.005
Rv3224A	0.743	2.804	0.006
Rv2095c	0.743	2.574	0.005
Rv2058c	0.743	3.14	0.006
Rv1701	0.743	2.427	0.005
Rv2778c	0.742	2.651	0.005
Rv2008c	0.742	2.58	0.005
Rv1339	0.742	2.521	0.005
Rv1741	0.741	2.751	0.006
Rv1727	0.741	2.575	0.005
Rv1298	0.741	2.533	0.005
Rv0543c	0.741	2.658	0.005
Rv3782	0.74	0.976	0.002
Rv3219	0.74	2.762	0.006
Rv3136	0.74	3.001	0.006
Rv2607	0.74	2.508	0.005
Rv2214c	0.74	3.151	0.006
Rv1571	0.74	2.737	0.005
Rv0906	0.74	2.566	0.005
Rv0720	0.74	3.079	0.006
Rv0220	0.74	2.537	0.005
Rv3724A	0.739	2.741	0.005
Rv3032A	0.739	2.821	0.006
Rv1382	0.739	2.972	0.006
Rv0950c	0.739	2.751	0.006
Rv0303	0.739	2.546	0.005
Rv0129c	0.739	2.67	0.005
Rv2943A	0.738	3.257	0.007
Rv1582c	0.738	2.659	0.005
Rv1027c	0.738	2.692	0.005
Rv0981	0.738	2.435	0.005
Rv0640	0.738	2.531	0.005
Rv0157A	0.738	2.618	0.005
Rv0081	0.738	2.488	0.005
Rv3254	0.737	2.397	0.005
Rv2848c	0.737	2.425	0.005
Rv0806c	0.737	2.55	0.005
Rv2863	0.736	2.524	0.005
Rv1221	0.736	2.409	0.005
Rv0609A	0.736	2.916	0.006
Rv2070c	0.735	2.515	0.005
Rv1585c	0.735	2.717	0.005
Rv1276c	0.735	2.494	0.005
Rv0277A	0.735	2.878	0.006
Rv0272c	0.735	2.541	0.005
Rv0063	0.735	2.292	0.005
Rv3177	0.734	2.689	0.005
Rv3167c	0.734	2.556	0.005
Rv2990c	0.734	2.497	0.005
Rv2771c	0.734	3.824	0.008
Rv0594	0.734	2.406	0.005
Rv0284	0.734	2.389	0.005
Rv3779	0.733	2.39	0.005
Rv3608c	0.733	2.53	0.005
Rv3437	0.733	2.612	0.005
Rv2527	0.733	2.511	0.005
Rv2254c	0.733	1.394	0.003
Rv1773c	0.733	2.418	0.005
Rv1375	0.733	2.417	0.005
Rv0373c	0.733	2.701	0.005
Rv0119	0.733	2.316	0.005
Rv3495c	0.732	2.308	0.005
Rv2575	0.732	3.079	0.006
Rv2102	0.732	2.525	0.005
Rv0662c	0.732	2.346	0.005
Rv0365c	0.732	2.967	0.006
Rv3885c	0.731	2.498	0.005
Rv3196	0.731	2.425	0.005
Rv2499c	0.731	2.452	0.005
Rv2425c	0.731	2.5	0.005
Rv1816	0.731	2.663	0.005
Rv1714	0.731	2.554	0.005
Rv0456B	0.731	3.129	0.006
Rv3499c	0.73	2.51	0.005
Rv1936	0.73	2.461	0.005
Rv1884c	0.73	2.508	0.005
Rv0438c	0.73	2.332	0.005
Rv0277c	0.73	2.434	0.005
Rv3895c	0.729	0.386	0.001
Rv3604c	0.729	2.674	0.005
Rv3384c	0.729	2.264	0.005
Rv2257c	0.729	5.728	0.011
Rv1990A	0.729	2.6	0.005
Rv1987	0.729	3.017	0.006
Rv1960c	0.729	2.434	0.005
Rv1916	0.729	2.462	0.005
Rv1424c	0.729	2.63	0.005
Rv0325	0.729	2.388	0.005
Rv2659c	0.728	2.443	0.005
Rv2523c	0.728	2.832	0.006
Rv1962A	0.728	2.337	0.005
Rv1935c	0.728	2.381	0.005
Rv3450c	0.727	2.501	0.005
Rv3244c	0.727	2.235	0.004
Rv2307B	0.727	2.36	0.005
Rv2014	0.727	2.707	0.005
Rv0714	0.727	2.357	0.005
Rv3321c	0.726	2.417	0.005
Rv2224c	0.726	2.259	0.005
Rv1779c	0.726	2.402	0.005
Rv1513	0.726	2.505	0.005
Rv0145	0.726	2.43	0.005
Rv3392c	0.725	2.339	0.005
Rv2692	0.725	2.54	0.005
Rv2616	0.725	2.261	0.005
Rv2424c	0.725	2.315	0.005
Rv2366c	0.725	2.36	0.005
Rv1451	0.725	2.268	0.005
Rv1128c	0.725	2.345	0.005
Rv0999	0.725	2.521	0.005
Rv0544c	0.725	3.203	0.006
Rv0169	0.725	2.438	0.005
Rv3502c	0.724	0.797	0.002
Rv2773c	0.724	2.403	0.005
Rv2489c	0.724	2.514	0.005
Rv2460c	0.724	1.358	0.003
Rv0642c	0.724	2.551	0.005
Rv0412c	0.724	3.301	0.007
Rv3795	0.723	2.347	0.005
Rv3615c	0.723	5.257	0.011
Rv3350c	0.723	3.005	0.006
Rv3164c	0.723	2.354	0.005
Rv2197c	0.723	2.467	0.005
Rv2142c	0.723	1.18	0.002
Rv1167c	0.723	2.34	0.005
Rv0979c	0.723	2.622	0.005
Rv0530A	0.723	2.784	0.006
Rv3855	0.722	2.554	0.005
Rv3820c	0.722	2.194	0.004
Rv1160	0.722	2.377	0.005
Rv0767c	0.721	2.694	0.005
Rv0529	0.721	2.312	0.005
Rv0554	0.72	2.191	0.004
Rv3833	0.719	2.609	0.005
Rv2170	0.719	2.197	0.004
Rv2129c	0.719	1.113	0.002
Rv1983	0.719	3.167	0.006
Rv1715	0.719	2.442	0.005
Rv1296	0.719	2.127	0.004
Rv0223c	0.719	2.287	0.005
Rv3867	0.718	3.932	0.008
Rv3559c	0.718	2.348	0.005
Rv3351c	0.718	2.535	0.005
Rv2884	0.718	2.604	0.005
Rv1144	0.718	2.707	0.005
Rv0536	0.718	2.151	0.004
Rv0485	0.718	2.272	0.005
Rv2861c	0.717	2.3	0.005
Rv1332	0.717	2.312	0.005
Rv0078	0.717	2.482	0.005
Rv2959c	0.716	2.155	0.004
Rv2802c	0.716	2.276	0.005
Rv2166c	0.716	2.506	0.005
Rv1755c	0.716	2.192	0.004
Rv1749c	0.716	2.37	0.005
Rv0495c	0.716	2.539	0.005
Rv0332	0.716	2.302	0.005
Rv0173	0.716	2.325	0.005
Rv2557	0.715	2.287	0.005
Rv1747	0.715	2.521	0.005
Rv0450c	0.715	2.809	0.006
Rv3464	0.714	2.376	0.005
Rv3203	0.714	2.611	0.005
Rv2750	0.714	2.12	0.004
Rv2430c	0.714	2.355	0.005
Rv1477	0.714	2.162	0.004
Rv0565c	0.714	2.292	0.005
Rv0422c	0.714	2.36	0.005
Rv0046c	0.714	2.254	0.005
Rv3405c	0.713	2.42	0.005
Rv2809	0.713	2.254	0.005
Rv1491c	0.713	2.24	0.004
Rv1366A	0.713	1.073	0.002
Rv0939	0.713	2.153	0.004
Rv3049c	0.712	2.223	0.004
Rv1350	0.712	2.296	0.005
Rv1316c	0.712	2.221	0.004
Rv0760c	0.712	2.175	0.004
Rv0751c	0.712	2.139	0.004
Rv0233	0.712	2.258	0.005
Rv3650	0.711	2.481	0.005
Rv3374	0.711	2.241	0.004
Rv3208	0.711	2.364	0.005
Rv3098c	0.711	2.314	0.005
Rv1683	0.711	2.101	0.004
Rv1399c	0.711	2.163	0.004
Rv1361c	0.711	2.666	0.005
Rv1214c	0.711	2.32	0.005
Rv0868c	0.711	2.705	0.005
Rv3811	0.71	5.181	0.01
Rv3521	0.71	2.302	0.005
Rv3446c	0.71	2.311	0.005
Rv2982c	0.71	2.112	0.004
Rv2537c	0.71	2.551	0.005
Rv2322c	0.71	1.849	0.004
Rv2313c	0.71	2.363	0.005
Rv2012	0.71	2.243	0.004
Rv1996	0.71	2.067	0.004
Rv1378c	0.71	2.086	0.004
Rv1118c	0.71	2.476	0.005
Rv3544c	0.709	2.144	0.004
Rv2665	0.709	3.123	0.006
Rv3368c	0.708	2.353	0.005
Rv3365c	0.708	2.158	0.004
Rv1812c	0.708	2.111	0.004
Rv3303c	0.707	0.291	0.001
Rv2927c	0.707	2.051	0.004
Rv2801c	0.707	2.221	0.004
Rv2722	0.707	2.095	0.004
Rv2569c	0.707	1.5	0.003
Rv1312	0.707	2.882	0.006
Rv2395A	0.706	2.749	0.005
Rv1489	0.706	2.685	0.005
Rv0927c	0.706	2.27	0.005
Rv0379	0.706	2.087	0.004
Rv0077c	0.706	2.142	0.004
Rv2392	0.705	2.33	0.005
Rv1739c	0.705	2.197	0.004
Rv1577c	0.705	2.663	0.005
Rv0902c	0.705	2.174	0.004
Rv0299	0.705	2.248	0.004
Rv0088	0.705	2.163	0.004
Rv3889c	0.704	2.222	0.004
Rv2211c	0.704	2.283	0.005
Rv1533	0.704	2.075	0.004
Rv0592	0.704	2.095	0.004
Rv0589	0.704	2.044	0.004
Rv0315	0.704	2.934	0.006
Rv0306	0.704	2.172	0.004
Rv0142	0.704	2.263	0.005
Rv0013	0.704	2.021	0.004
Rv3766	0.703	2.069	0.004
Rv0765c	0.703	2.158	0.004
Rv0549c	0.703	2.208	0.004
Rv0133	0.703	2.113	0.004
Rv3627c	0.702	2.473	0.005
Rv1408	0.702	2.024	0.004
Rv1189	0.702	2.086	0.004
Rv0598c	0.702	2.236	0.004
Rv3890c	0.701	3.533	0.007
Rv3565	0.701	2.021	0.004
Rv1644	0.701	2.073	0.004
Rv1600	0.701	2.09	0.004
Rv3258c	0.7	0.389	0.001
Rv3180c	0.7	1.966	0.004
Rv2282c	0.7	1.997	0.004
Rv1470	0.7	2.411	0.005
Rv0784	0.7	2.163	0.004
Rv0540	0.7	2.281	0.005
Rv0516c	0.7	2.405	0.005
Rv0419	0.7	2.189	0.004
Rv3212	0.699	2.3	0.005
Rv2926c	0.699	2.071	0.004
Rv2442c	0.699	2.204	0.004
Rv0661c	0.699	2.491	0.005
Rv0612	0.699	2.066	0.004
Rv0429c	0.699	2.129	0.004
Rv0372c	0.699	2.077	0.004
Rv0273c	0.699	2.163	0.004
Rv2229c	0.698	2.342	0.005
Rv1823	0.698	2.06	0.004
Rv0977	0.698	3.537	0.007
Rv0623	0.698	2.284	0.005
Rv0424c	0.698	2.501	0.005
Rv3393	0.697	1.075	0.002
Rv2471	0.697	1.94	0.004
Rv2245	0.697	1.974	0.004
Rv3407	0.696	2.239	0.004
Rv2251	0.696	2.102	0.004
Rv1938	0.696	2.052	0.004
Rv0367c	0.696	2.018	0.004
Rv3010c	0.695	2.237	0.004
Rv2740	0.695	2.014	0.004
Rv2608	0.695	2.28	0.005
Rv2318	0.695	1.985	0.004
Rv2247	0.695	1.992	0.004
Rv2114	0.695	2.071	0.004
Rv1833c	0.695	2.302	0.005
Rv1775	0.695	2.046	0.004
Rv1255c	0.695	2.156	0.004
Rv0321	0.695	2.161	0.004
Rv0170	0.695	2.064	0.004
Rv3813c	0.694	2.41	0.005
Rv3648c	0.694	2.212	0.004
Rv3241c	0.694	6.891	0.014
Rv3098A	0.694	2.026	0.004
Rv3094c	0.694	2.452	0.005
Rv2328	0.694	2.217	0.004
Rv2142A	0.694	2.382	0.005
Rv1873	0.694	2.001	0.004
Rv1871c	0.694	2.087	0.004
Rv1861	0.694	2.49	0.005
Rv3305c	0.693	0.527	0.001
Rv3071	0.693	1.979	0.004
Rv3050c	0.693	2.179	0.004
Rv1948c	0.693	2.301	0.005
Rv3057c	0.692	2.224	0.004
Rv2493	0.692	2.046	0.004
Rv2459	0.692	2.024	0.004
Rv2157c	0.692	4.617	0.009
Rv1981c	0.692	1.941	0.004
Rv1786	0.692	2.292	0.005
Rv1535	0.692	2.038	0.004
Rv3567c	0.691	2.03	0.004
Rv3089	0.691	1.935	0.004
Rv2539c	0.691	2.118	0.004
Rv2225	0.691	2.1	0.004
Rv1465	0.691	2.216	0.004
Rv0353	0.691	2.227	0.004
Rv0049	0.691	2.587	0.005
Rv3169	0.69	1.909	0.004
Rv2558	0.69	2.079	0.004
Rv1745c	0.69	2.178	0.004
Rv1377c	0.69	2.107	0.004
Rv0059	0.69	2.282	0.005
Rv1519	0.689	2.015	0.004
Rv0819	0.689	2.152	0.004
Rv3809c	0.688	3.704	0.007
Rv1467c	0.688	1.912	0.004
Rv1247c	0.688	2.248	0.004
Rv1166	0.688	1.972	0.004
Rv0136	0.688	2.088	0.004
Rv3197A	0.687	1.983	0.004
Rv3114	0.687	1.964	0.004
Rv2893	0.687	1.898	0.004
Rv0807	0.687	2.625	0.005
Rv2604c	0.686	2.47	0.005
Rv0557	0.686	2.011	0.004
Rv3655c	0.685	2.701	0.005
Rv2349c	0.685	1.922	0.004
Rv1955	0.685	2.018	0.004
Rv1945	0.685	1.959	0.004
Rv1081c	0.685	1.385	0.003
Rv0926c	0.685	1.888	0.004
Rv0079	0.685	1.888	0.004
Rv3723	0.684	2.667	0.005
Rv3693	0.684	3.338	0.007
Rv1928c	0.684	1.918	0.004
Rv1539	0.684	2.618	0.005
Rv1198	0.684	2.005	0.004
Rv0781	0.684	2.165	0.004
Rv0762c	0.684	2.071	0.004
Rv0579	0.684	1.883	0.004
Rv0201c	0.684	2.446	0.005
Rv3157	0.683	2.047	0.004
Rv1205	0.683	0.912	0.002
Rv0859	0.683	1.901	0.004
Rv0676c	0.683	2.323	0.005
Rv3664c	0.682	2.593	0.005
Rv3442c	0.682	2.443	0.005
Rv3282	0.682	1.253	0.003
Rv2824c	0.682	2.188	0.004
Rv1836c	0.682	2.701	0.005
Rv0078A	0.682	1.945	0.004
Rv3328c	0.681	2.056	0.004
Rv3269	0.681	2.508	0.005
Rv3032	0.681	1.891	0.004
Rv1762c	0.681	1.877	0.004
Rv1562c	0.681	1.948	0.004
Rv1242	0.681	1.992	0.004
Rv0562	0.681	1.824	0.004
Rv0162c	0.681	1.935	0.004
Rv3844	0.68	0.568	0.001
Rv3348	0.68	1.86	0.004
Rv3133c	0.68	1.817	0.004
Rv3084	0.68	2.01	0.004
Rv2363	0.68	2.044	0.004
Rv2346c	0.68	1.975	0.004
Rv2123	0.68	2.651	0.005
Rv2044c	0.68	1.327	0.003
Rv1567c	0.68	2.42	0.005
Rv1504c	0.68	1.957	0.004
Rv3335c	0.679	1.975	0.004
Rv3087	0.679	2.151	0.004
Rv2935	0.679	1.886	0.004
Rv2549c	0.679	1.834	0.004
Rv1220c	0.679	1.896	0.004
Rv1193	0.679	1.929	0.004
Rv0474	0.679	2.06	0.004
Rv3907c	0.678	1.867	0.004
Rv3762c	0.678	2.067	0.004
Rv3118	0.678	2.658	0.005
Rv2862c	0.678	2.032	0.004
Rv1793	0.678	1.962	0.004
Rv1651c	0.678	3.371	0.007
Rv0814c	0.678	2.658	0.005
Rv0402c	0.678	2.312	0.005
Rv1508c	0.677	2.425	0.005
Rv1301	0.677	1.847	0.004
Rv1159	0.677	2.01	0.004
Rv0867c	0.677	2.647	0.005
Rv3278c	0.676	1.034	0.002
Rv2794c	0.676	1.84	0.004
Rv2644c	0.676	1.937	0.004
Rv2581c	0.676	1.976	0.004
Rv2449c	0.676	2.05	0.004
Rv2226	0.676	2.245	0.004
Rv2011c	0.676	2.003	0.004
Rv0634c	0.676	1.906	0.004
Rv0566c	0.676	1.983	0.004
Rv0454	0.676	2.055	0.004
Rv3886c	0.675	1.831	0.004
Rv3695	0.675	2.505	0.005
Rv3665c	0.675	1.968	0.004
Rv3382c	0.675	1.925	0.004
Rv2876	0.675	4.398	0.009
Rv2256c	0.675	0.454	0.001
Rv2159c	0.675	2.333	0.005
Rv2031c	0.675	0.809	0.002
Rv0028	0.675	2.282	0.005
Rv2582	0.674	3.01	0.006
Rv2165c	0.674	1.836	0.004
Rv1909c	0.674	0.351	0.001
Rv1711	0.674	1.945	0.004
Rv3692	0.673	0.502	0.001
Rv1643	0.673	2.302	0.005
Rv1575	0.673	1.83	0.004
Rv0945	0.673	1.947	0.004
Rv0596c	0.673	1.932	0.004
Rv3848	0.672	2.489	0.005
Rv3253c	0.672	2.203	0.004
Rv3116	0.672	1.814	0.004
Rv2855	0.672	1.846	0.004
Rv2530A	0.672	2.06	0.004
Rv1578c	0.672	1.929	0.004
Rv1053c	0.672	2.187	0.004
Rv0697	0.672	1.871	0.004
Rv0395	0.672	1.913	0.004
Rv0108c	0.672	3.375	0.007
Rv3917c	0.671	1.92	0.004
Rv3358	0.671	1.879	0.004
Rv2518c	0.671	2.008	0.004
Rv0773c	0.671	1.795	0.004
Rv0491	0.671	1.96	0.004
Rv0334	0.671	1.825	0.004
Rv3493c	0.67	1.988	0.004
Rv3054c	0.67	2.058	0.004
Rv2993c	0.67	1.299	0.003
Rv2954c	0.67	1.964	0.004
Rv2694c	0.67	2.234	0.004
Rv1482c	0.67	1.764	0.004
Rv3421c	0.669	2.099	0.004
Rv3406	0.669	2.006	0.004
Rv0502	0.669	1.984	0.004
Rv2837c	0.668	2.222	0.004
Rv2579	0.668	2.002	0.004
Rv1131	0.668	2.126	0.004
Rv0403c	0.668	2.805	0.006
Rv0324	0.668	1.834	0.004
Rv3517	0.667	1.921	0.004
Rv3462c	0.667	4.568	0.009
Rv2218	0.667	1.823	0.004
Rv2181	0.667	1.867	0.004
Rv1400c	0.667	1.775	0.004
Rv3617	0.666	1.788	0.004
Rv3593	0.666	1.227	0.002
Rv3552	0.666	0.77	0.002
Rv3160c	0.666	1.887	0.004
Rv3013	0.666	3.137	0.006
Rv2810c	0.666	1.982	0.004
Rv2285	0.666	1.801	0.004
Rv0591	0.666	1.73	0.003
Rv0230c	0.666	1.77	0.004
Rv0068	0.666	1.728	0.003
Rv3761c	0.665	3.096	0.006
Rv3171c	0.665	1.961	0.004
Rv3045	0.665	1.741	0.003
Rv2874	0.665	2.671	0.005
Rv0418	0.665	1.788	0.004
Rv3783	0.664	3.098	0.006
Rv3548c	0.664	0.447	0.001
Rv3312A	0.664	2.25	0.004
Rv2888c	0.664	2.174	0.004
Rv1694	0.664	1.915	0.004
Rv0588	0.664	2.323	0.005
Rv3732	0.663	0.977	0.002
Rv3340	0.663	1.711	0.003
Rv3217c	0.663	2.277	0.005
Rv2596	0.663	2.145	0.004
Rv1523	0.663	1.749	0.003
Rv1201c	0.663	1.753	0.004
Rv0873	0.663	1.708	0.003
Rv0570	0.663	1.887	0.004
Rv0140	0.663	1.744	0.003
Rv3529c	0.662	1.812	0.004
Rv2981c	0.662	1.845	0.004
Rv1717	0.662	1.811	0.004
Rv1062	0.662	1.853	0.004
Rv0816c	0.662	2.232	0.004
Rv1838c	0.661	1.933	0.004
Rv1675c	0.661	1.816	0.004
Rv1428c	0.661	1.697	0.003
Rv0790c	0.661	1.927	0.004
Rv0172	0.661	1.708	0.003
Rv3788	0.66	1.81	0.004
Rv2859c	0.66	2.112	0.004
Rv2672	0.66	1.711	0.003
Rv2295	0.66	1.688	0.003
Rv1709	0.66	1.705	0.003
Rv1623c	0.66	1.942	0.004
Rv1041c	0.66	1.802	0.004
Rv0354c	0.66	1.853	0.004
Rv3704c	0.659	1.671	0.003
Rv3387	0.659	1.92	0.004
Rv0597c	0.659	1.687	0.003
Rv0408	0.659	1.77	0.004
Rv0319	0.659	1.694	0.003
Rv3498c	0.658	1.883	0.004
Rv2938	0.658	2.163	0.004
Rv2937	0.658	2.131	0.004
Rv0581	0.658	1.868	0.004
Rv0007	0.658	2.041	0.004
Rv3540c	0.657	1.718	0.003
Rv2831	0.657	2.028	0.004
Rv2183c	0.657	1.81	0.004
Rv2015c	0.657	1.903	0.004
Rv1970	0.657	1.677	0.003
Rv1782	0.657	2.424	0.005
Rv1006	0.657	1.745	0.003
Rv0234c	0.657	2.021	0.004
Rv3653	0.656	3.006	0.006
Rv3364c	0.656	1.765	0.004
Rv3143	0.656	1.843	0.004
Rv2601A	0.656	1.738	0.003
Rv2331	0.656	2.008	0.004
Rv2237	0.656	1.788	0.004
Rv2117	0.656	1.733	0.003
Rv2083	0.656	1.998	0.004
Rv1934c	0.656	1.797	0.004
Rv0996	0.656	0.525	0.001
Rv3560c	0.655	0.842	0.002
Rv3268	0.655	1.679	0.003
Rv3052c	0.655	1.796	0.004
Rv2789c	0.655	1.859	0.004
Rv1806	0.655	1.897	0.004
Rv2843	0.654	2.376	0.005
Rv2273	0.654	2.49	0.005
Rv0803	0.654	1.71	0.003
Rv0040c	0.654	1.977	0.004
Rv3685c	0.653	1.831	0.004
Rv2143	0.653	1.893	0.004
Rv3683	0.652	0.885	0.002
Rv3221c	0.652	7.351	0.015
Rv2443	0.652	2.42	0.005
Rv1043c	0.652	0.221	0
Rv0192	0.652	1.719	0.003
Rv3614c	0.651	1.053	0.002
Rv2246	0.651	1.746	0.003
Rv0383c	0.651	2.219	0.004
Rv3794	0.65	1.758	0.004
Rv3672c	0.65	1.998	0.004
Rv3042c	0.65	1.658	0.003
Rv0615	0.65	1.951	0.004
Rv1919c	0.649	1.792	0.004
Rv0840c	0.649	1.723	0.003
Rv0331	0.649	1.667	0.003
Rv0209	0.649	1.873	0.004
Rv2941	0.648	1.676	0.003
Rv2040c	0.648	0.749	0.001
Rv1436	0.648	1.715	0.003
Rv0653c	0.648	1.685	0.003
Rv0602c	0.648	1.752	0.004
Rv3260c	0.647	2.184	0.004
Rv2924c	0.647	1.657	0.003
Rv1839c	0.647	1.988	0.004
Rv1212c	0.647	1.597	0.003
Rv0376c	0.647	1.682	0.003
Rv3703c	0.646	1.669	0.003
Rv3501c	0.646	3.407	0.007
Rv3375	0.646	1.664	0.003
Rv2536	0.646	1.982	0.004
Rv0846c	0.646	1.796	0.004
Rv0663	0.646	1.697	0.003
Rv0496	0.646	1.751	0.004
Rv0487	0.646	1.623	0.003
Rv0271c	0.646	1.623	0.003
Rv3369	0.645	1.928	0.004
Rv3075c	0.645	1.027	0.002
Rv2613c	0.645	1.728	0.003
Rv2255c	0.645	1.916	0.004
Rv2250c	0.645	1.94	0.004
Rv2169c	0.645	2.326	0.005
Rv2126c	0.645	0.676	0.001
Rv1516c	0.645	1.94	0.004
Rv0250c	0.645	1.777	0.004
Rv3409c	0.644	1.626	0.003
Rv2300c	0.644	0.638	0.001
Rv0194	0.644	1.844	0.004
Rv2216	0.643	1.608	0.003
Rv3757c	0.642	1.81	0.004
Rv2946c	0.642	1.586	0.003
Rv1515c	0.642	1.688	0.003
Rv1011	0.642	1.643	0.003
Rv0744c	0.642	1.702	0.003
Rv0649	0.642	1.876	0.004
Rv0533c	0.642	1.63	0.003
Rv1351	0.641	2.061	0.004
Rv0459	0.641	1.822	0.004
Rv3773c	0.64	0.636	0.001
Rv1742	0.64	1.731	0.003
Rv1639c	0.64	1.604	0.003
Rv0493c	0.64	1.702	0.003
Rv0218	0.64	2.05	0.004
Rv0095c	0.64	2.192	0.004
Rv3878	0.639	1.619	0.003
Rv3622c	0.639	1.819	0.004
Rv3553	0.639	1.697	0.003
Rv2620c	0.639	2.385	0.005
Rv2602	0.639	1.732	0.003
Rv1855c	0.639	1.629	0.003
Rv1389	0.639	1.841	0.004
Rv1219c	0.639	1.879	0.004
Rv0033	0.639	1.741	0.003
Rv0012	0.639	1.94	0.004
Rv3377c	0.638	1.612	0.003
Rv3125c	0.638	1.591	0.003
Rv2680	0.638	1.736	0.003
Rv2148c	0.638	3.441	0.007
Rv1111c	0.638	0.666	0.001
Rv0650	0.638	2.458	0.005
Rv3261	0.637	1.647	0.003
Rv3213c	0.637	1.68	0.003
Rv1474c	0.636	1.676	0.003
Rv0779c	0.636	2.256	0.005
Rv0669c	0.636	0.723	0.001
Rv3606c	0.635	0.423	0.001
Rv2712c	0.635	1.578	0.003
Rv0644c	0.635	1.589	0.003
Rv3798	0.634	1.742	0.003
Rv2039c	0.634	1.746	0.003
Rv1359	0.634	1.629	0.003
Rv1313c	0.634	1.742	0.003
Rv0711	0.634	1.669	0.003
Rv0138	0.634	2.152	0.004
Rv0009	0.634	1.555	0.003
Rv3418c	0.633	1.72	0.003
Rv2719c	0.633	1.492	0.003
Rv3506	0.632	1.53	0.003
Rv3048c	0.632	1.242	0.002
Rv2369c	0.632	1.892	0.004
Rv1405c	0.632	1.557	0.003
Rv0966c	0.632	2.04	0.004
Rv3834c	0.631	1.56	0.003
Rv3347c	0.631	2.466	0.005
Rv2568c	0.631	1.534	0.003
Rv0957	0.631	1.581	0.003
Rv0856	0.631	1.918	0.004
Rv0503c	0.631	1.62	0.003
Rv3743c	0.63	0.996	0.002
Rv2374c	0.63	1.512	0.003
Rv1778c	0.63	1.6	0.003
Rv1702c	0.63	1.663	0.003
Rv1483	0.63	1.657	0.003
Rv1263	0.63	1.612	0.003
Rv0400c	0.63	1.596	0.003
Rv0387c	0.629	2.216	0.004
Rv3724B	0.628	1.66	0.003
Rv3679	0.628	1.626	0.003
Rv3242c	0.628	1.579	0.003
Rv2687c	0.628	2.086	0.004
Rv2431c	0.628	1.78	0.004
Rv2160A	0.628	1.816	0.004
Rv0472c	0.628	1.84	0.004
Rv2891	0.627	1.613	0.003
Rv2885c	0.627	1.654	0.003
Rv2589	0.627	1.512	0.003
Rv1738	0.627	1.831	0.004
Rv1185c	0.627	1.552	0.003
Rv3877	0.626	1.831	0.004
Rv3636	0.626	1.721	0.003
Rv3457c	0.626	1.502	0.003
Rv3400	0.626	1.495	0.003
Rv3100c	0.626	1.808	0.004
Rv1958c	0.626	1.549	0.003
Rv1631	0.626	1.661	0.003
Rv0904c	0.626	1.586	0.003
Rv0499	0.626	1.53	0.003
Rv3459c	0.625	1.883	0.004
Rv3168	0.625	1.568	0.003
Rv3035	0.625	3.712	0.007
Rv2472	0.625	1.624	0.003
Rv2398c	0.625	1.688	0.003
Rv3394c	0.624	1.501	0.003
Rv1952	0.624	1.693	0.003
Rv1679	0.624	1.478	0.003
Rv1529	0.624	1.529	0.003
Rv1321	0.624	1.661	0.003
Rv0988	0.624	0.834	0.002
Rv0330c	0.624	1.497	0.003
Rv0067c	0.624	1.67	0.003
Rv2834c	0.623	1.752	0.004
Rv1647	0.623	1.543	0.003
Rv1195	0.623	1.914	0.004
Rv0428c	0.623	1.524	0.003
Rv0245	0.623	1.515	0.003
Rv3362c	0.622	1.575	0.003
Rv2716	0.622	0.915	0.002
Rv2561	0.622	1.726	0.003
Rv2275	0.622	1.52	0.003
Rv1496	0.622	1.521	0.003
Rv1463	0.622	1.504	0.003
Rv1458c	0.622	1.515	0.003
Rv1076	0.622	1.463	0.003
Rv0289	0.622	1.585	0.003
Rv3571	0.621	1.497	0.003
Rv3332	0.621	1.767	0.004
Rv3206c	0.621	2.042	0.004
Rv2902c	0.621	1.479	0.003
Rv2525c	0.621	1.481	0.003
Rv2315c	0.621	1.662	0.003
Rv2130c	0.621	1.515	0.003
Rv2020c	0.621	1.409	0.003
Rv1979c	0.621	1.798	0.004
Rv1552	0.621	1.456	0.003
Rv1453	0.621	1.532	0.003
Rv1130	0.621	1.702	0.003
Rv0971c	0.621	1.47	0.003
Rv0467	0.621	1.488	0.003
Rv3814c	0.62	0.751	0.002
Rv2755c	0.62	1.662	0.003
Rv1809	0.62	2.289	0.005
Rv1603	0.62	1.524	0.003
Rv1163	0.62	1.655	0.003
Rv0943c	0.62	1.618	0.003
Rv0786c	0.62	1.688	0.003
Rv2393	0.619	1.731	0.003
Rv2088	0.619	1.951	0.004
Rv0783c	0.619	1.633	0.003
Rv0449c	0.619	1.479	0.003
Rv0311	0.619	1.525	0.003
Rv0056	0.619	1.708	0.003
Rv3911	0.618	1.512	0.003
Rv3837c	0.618	1.633	0.003
Rv3556c	0.618	1.443	0.003
Rv1191	0.618	1.515	0.003
Rv0974c	0.618	1.466	0.003
Rv1924c	0.617	2.083	0.004
Rv1293	0.617	1.468	0.003
Rv1070c	0.617	1.644	0.003
Rv0823c	0.617	1.45	0.003
Rv0483	0.617	1.484	0.003
Rv0097	0.617	1.485	0.003
Rv3592	0.616	3.252	0.007
Rv2516c	0.616	1.528	0.003
Rv2201	0.616	1.518	0.003
Rv1568	0.616	1.442	0.003
Rv0995	0.616	7.307	0.015
Rv0458	0.616	1.468	0.003
Rv0126	0.616	1.467	0.003
Rv3336c	0.615	1.466	0.003
Rv3293	0.615	4.096	0.008
Rv1565c	0.615	1.797	0.004
Rv1343c	0.615	1.847	0.004
Rv1227c	0.615	1.544	0.003
Rv1177	0.615	1.468	0.003
Rv0983	0.615	2.288	0.005
Rv0238	0.615	1.522	0.003
Rv3728	0.614	2.391	0.005
Rv3410c	0.614	1.473	0.003
Rv3313c	0.614	1.425	0.003
Rv3137	0.614	1.436	0.003
Rv3043c	0.614	2.017	0.004
Rv2669	0.614	1.682	0.003
Rv2435c	0.614	1.69	0.003
Rv2339	0.614	2.238	0.004
Rv0884c	0.614	1.514	0.003
Rv2491	0.613	1.496	0.003
Rv2068c	0.613	1.433	0.003
Rv1615	0.613	2.678	0.005
Rv0986	0.613	0.972	0.002
Rv0404	0.613	1.457	0.003
Rv0050	0.613	1.494	0.003
Rv3827c	0.612	1.516	0.003
Rv3574	0.612	1.488	0.003
Rv1997	0.612	1.883	0.004
Rv1604	0.612	1.427	0.003
Rv0842	0.612	1.827	0.004
Rv0359	0.612	1.538	0.003
Rv3356c	0.611	0.848	0.002
Rv2786c	0.611	1.516	0.003
Rv1597	0.611	1.458	0.003
Rv1153c	0.611	1.605	0.003
Rv3777	0.61	1.411	0.003
Rv3760	0.61	1.919	0.004
Rv3497c	0.61	1.5	0.003
Rv3456c	0.61	1.998	0.004
Rv1328	0.61	1.484	0.003
Rv1079	0.61	1.434	0.003
Rv0776c	0.61	1.429	0.003
Rv0757	0.61	1.421	0.003
Rv0755c	0.61	2.429	0.005
Rv0110	0.61	2.436	0.005
Rv3490	0.609	1.507	0.003
Rv3309c	0.609	0.718	0.001
Rv3292	0.609	1.823	0.004
Rv2054	0.609	1.577	0.003
Rv1937	0.609	1.399	0.003
Rv1484	0.609	1.454	0.003
Rv0908	0.609	1.752	0.004
Rv1326c	0.608	1.522	0.003
Rv1058	0.608	1.447	0.003
Rv0878c	0.608	2.003	0.004
Rv0799c	0.608	1.41	0.003
Rv0528	0.608	1.78	0.004
Rv0166	0.608	1.571	0.003
Rv0137c	0.608	1.435	0.003
Rv2507	0.607	2.001	0.004
Rv2461c	0.607	1.417	0.003
Rv2136c	0.607	2.344	0.005
Rv3842c	0.606	0.371	0.001
Rv2686c	0.606	1.849	0.004
Rv2081c	0.606	1.915	0.004
Rv0791c	0.606	1.439	0.003
Rv0635	0.606	1.449	0.003
Rv0053	0.606	1.535	0.003
Rv0014c	0.606	1.001	0.002
Rv3924c	0.605	1.833	0.004
Rv3570c	0.605	1.486	0.003
Rv1865c	0.605	1.508	0.003
Rv1273c	0.605	1.591	0.003
Rv0385	0.605	1.46	0.003
Rv0226c	0.605	2.041	0.004
Rv0181c	0.605	1.421	0.003
Rv3214	0.604	1.6	0.003
Rv2112c	0.604	1.488	0.003
Rv2079	0.604	1.507	0.003
Rv1108c	0.604	1.644	0.003
Rv0830	0.604	1.403	0.003
Rv0112	0.604	1.399	0.003
Rv0001	0.604	1.458	0.003
Rv3822	0.603	0.856	0.002
Rv3712	0.603	0.615	0.001
Rv2445c	0.603	1.525	0.003
Rv1680	0.603	1.378	0.003
Rv1546	0.603	1.457	0.003
Rv1413	0.603	1.39	0.003
Rv0560c	0.603	1.386	0.003
Rv3224	0.602	1.43	0.003
Rv2180c	0.602	1.512	0.003
Rv1373	0.602	1.433	0.003
Rv3575c	0.601	1.443	0.003
Rv3297	0.601	1.433	0.003
Rv2865	0.601	1.634	0.003
Rv2317	0.601	1.707	0.003
Rv1843c	0.601	1.504	0.003
Rv1612	0.601	1.452	0.003
Rv3722c	0.6	2.349	0.005
Rv3709c	0.6	1.407	0.003
Rv2621c	0.6	1.591	0.003
Rv2362c	0.6	1.39	0.003
Rv1627c	0.6	1.389	0.003
Rv1182	0.6	1.373	0.003
Rv1152	0.6	1.403	0.003
Rv0409	0.6	1.431	0.003
Rv2857c	0.599	1.558	0.003
Rv2605c	0.599	1.445	0.003
Rv2219A	0.599	1.623	0.003
Rv2163c	0.599	2.179	0.004
Rv1863c	0.599	2.058	0.004
Rv1588c	0.599	1.562	0.003
Rv1331	0.599	1.464	0.003
Rv0761c	0.599	1.378	0.003
Rv3329	0.598	1.424	0.003
Rv3040c	0.598	0.972	0.002
Rv2470	0.598	1.572	0.003
Rv2016	0.598	1.548	0.003
Rv1851	0.598	1.387	0.003
Rv0989c	0.598	1.403	0.003
Rv0809	0.598	1.457	0.003
Rv0713	0.598	1.865	0.004
Rv0113	0.598	1.456	0.003
Rv0002	0.598	1.367	0.003
Rv3194c	0.597	1.401	0.003
Rv3112	0.597	1.462	0.003
Rv1991A	0.597	1.396	0.003
Rv1502	0.597	1.463	0.003
Rv1135c	0.597	2.506	0.005
Rv1095	0.597	1.378	0.003
Rv0727c	0.597	1.474	0.003
Rv0482	0.597	1.347	0.003
[truncated: 2,025 more rows]

## Sheet: Mra-Signal P
SignalP-5.0 Prediction for M. tuberculosis H37Ra Secreted Proteins
# SignalP-5.0	Organism: gram+	Timestamp: 20220701033902
# ID	Prediction	SP(Sec/SPI)	TAT(Tat/SPI)	LIPO(Sec/SPII)	OTHER	CS Position
MRA_0801	OTHER	0.048483	0.013203	0.00948	0.928833
MRA_0800	OTHER	0.004573	0.001045	0.001316	0.993066
MRA_3080	OTHER	0.009665	0.000298	0.001169	0.988868
MRA_3081	OTHER	0.10061	0.05627	0.017395	0.825725
MRA_3082	OTHER	0.00663	0.001954	0.00104	0.990376
MRA_3083	OTHER	0.001477	0.000197	0.000379	0.997948
MRA_3084	OTHER	0.013401	0.003099	0.001315	0.982186
MRA_3074	OTHER	0.014093	0.000809	0.002247	0.98285
MRA_3075	OTHER	0.00526	0.000291	0.009625	0.984825
MRA_3076	LIPO(Sec/SPII)	0.004239	0.000375	0.99498	0.000406	CS pos: 19-20. SSG-CG. Pr: 0.9930
MRA_3077	OTHER	0.079407	0.005579	0.014212	0.900802
MRA_3078	OTHER	0.007112	0.001197	0.001237	0.990455
MRA_3079	OTHER	0.003063	0.00032	0.000679	0.995939
MRA_0809	SP(Sec/SPI)	0.482975	0.010654	0.084698	0.421673	CS pos: 28-29. IGA-DG. Pr: 0.1725
MRA_0808	OTHER	0.013327	0.004706	0.001834	0.980133
MRA_0807	OTHER	0.005653	0.001123	0.001344	0.99188
MRA_0806	OTHER	0.012013	0.000985	0.003449	0.983554
MRA_0805	OTHER	0.014446	0.008318	0.004296	0.97294
MRA_0804	OTHER	0.028875	0.006246	0.006584	0.958295
MRA_0803	OTHER	0.043734	0.019188	0.003104	0.933974
MRA_0802	OTHER	0.006234	0.003367	0.001182	0.989218
MRA_1298A	OTHER	0.073188	0.013645	0.01615	0.897017
MRA_0812	OTHER	0.00379	0.000145	0.000446	0.99562
MRA_0811	OTHER	0.006729	0.000699	0.001425	0.991146
MRA_0810	OTHER	0.013402	0.001985	0.004593	0.98002
MRA_3090	OTHER	0.009173	0.005593	0.004307	0.980927
MRA_3091	OTHER	0.005211	0.002129	0.000738	0.991922
MRA_3092	OTHER	0.005084	0.00817	0.004532	0.982214
MRA_3093	OTHER	0.013334	0.033441	0.002911	0.950315
MRA_3094	OTHER	0.018153	0.005585	0.004697	0.971565
MRA_3095	OTHER	0.006165	0.000864	0.008771	0.9842
MRA_3085	OTHER	0.026096	0.000841	0.011103	0.96196
MRA_3086	OTHER	0.026207	0.009232	0.00368	0.960881
MRA_3087	OTHER	0.02622	0.020928	0.001865	0.950987
MRA_3088	OTHER	0.010118	0.002673	0.001923	0.985286
MRA_3089	OTHER	0.107434	0.131304	0.009835	0.751427
MRA_0819	OTHER	0.009119	0.003205	0.001822	0.985854
MRA_0818	OTHER	0.012217	0.001213	0.001782	0.984789
MRA_0817	OTHER	0.023297	0.019237	0.002824	0.954643
MRA_0816	OTHER	0.004062	0.001423	0.001344	0.993171
MRA_0815	OTHER	0.003492	0.000717	0.000414	0.995377
MRA_0814	OTHER	0.116029	0.081016	0.084794	0.718162
MRA_0813	OTHER	0.014318	0.001512	0.002486	0.981685
MRA_3060	OTHER	0.003789	0.000144	0.000496	0.995571
MRA_3061	OTHER	0.021811	0.004237	0.005635	0.968317
MRA_3062	OTHER	0.014405	0.002351	0.002238	0.981005
MRA_3052	OTHER	0.177093	0.103247	0.021461	0.698199
MRA_3053	SP(Sec/SPI)	0.433752	0.3213	0.032621	0.212326	CS pos: 42-43. APA-AD. Pr: 0.1126
MRA_3054	OTHER	0.098961	0.200791	0.00442	0.695828
MRA_3055	OTHER	0.085318	0.015689	0.027949	0.871044
MRA_3056	OTHER	0.012289	0.010745	0.002524	0.974442
MRA_3057	OTHER	0.027183	0.009909	0.048161	0.914748
MRA_3058	OTHER	0.062065	0.009979	0.009039	0.918917
MRA_3059	OTHER	0.030829	0.038135	0.002518	0.928519
MRA_3070	OTHER	0.021831	0.007152	0.001742	0.969275
MRA_3071	OTHER	0.008251	0.003004	0.001375	0.98737
MRA_3072	OTHER	0.011252	0.007735	0.001649	0.979363
MRA_3073	OTHER	0.01787	0.001581	0.000932	0.979617
MRA_3063	OTHER	0.169538	0.018909	0.041771	0.769782
MRA_3064	OTHER	0.027622	0.001717	0.002973	0.967688
MRA_3065	LIPO(Sec/SPII)	0.061979	0.018227	0.916945	0.002849	CS pos: 24-25. PTA-CS. Pr: 0.9139
MRA_3066	OTHER	0.312551	0.308251	0.061174	0.318024
MRA_3067	OTHER	0.072449	0.003783	0.126135	0.797632
MRA_3068	SP(Sec/SPI)	0.969697	0.002907	0.023853	0.003543	CS pos: 22-23. AAG-AP. Pr: 0.5341
MRA_3069	OTHER	0.028524	0.073241	0.006159	0.892076
MRA_0845	OTHER	0.017353	0.007075	0.00227	0.973302
MRA_0844	OTHER	0.009493	0.000795	0.001579	0.988132
MRA_0843	LIPO(Sec/SPII)	0.007523	0.000449	0.991491	0.000537	CS pos: 22-23. TTA-CS. Pr: 0.9867
MRA_0842	OTHER	0.210064	0.205105	0.01108	0.573751
MRA_0841	SP(Sec/SPI)	0.707646	0.171488	0.023676	0.09719	CS pos: 43-44. AAA-AD. Pr: 0.2738
MRA_0840	OTHER	0.012669	0.001655	0.00089	0.984786
MRA_0849	OTHER	0.062963	0.008862	0.017854	0.910321
MRA_0848	OTHER	0.019358	0.002944	0.003619	0.974078
MRA_0847	OTHER	0.065294	0.028335	0.076878	0.829493
MRA_0846	LIPO(Sec/SPII)	0.035413	0.000456	0.962467	0.001663	CS pos: 22-23. ACA-CD. Pr: 0.5949
MRA_0856	OTHER	0.020516	0.004986	0.003656	0.970843
MRA_0855	LIPO(Sec/SPII)	0.036643	0.003828	0.948613	0.010916	CS pos: 23-24. AAA-CW. Pr: 0.9544
MRA_0854	TAT(Tat/SPI)	0.005116	0.960144	0.034184	0.000556	CS pos: 44-45. SGA-AG. Pr: 0.2326
MRA_0853	OTHER	0.025789	0.0051	0.006693	0.962418
MRA_0852	OTHER	0.012045	0.003514	0.000707	0.983735
MRA_0851	OTHER	0.004295	0.003157	0.000365	0.992183
MRA_0850	OTHER	0.049619	0.008853	0.007479	0.934049
MRA_0859	OTHER	0.036502	0.057662	0.014632	0.891204
MRA_0858	OTHER	0.03122	0.012477	0.008476	0.947827
MRA_0857	OTHER	0.009385	0.000524	0.000879	0.989212
MRA_0823	OTHER	0.044827	0.03778	0.010273	0.90712
MRA_0822	OTHER	0.003511	0.000291	0.000489	0.995709
MRA_0821	OTHER	0.011849	0.000926	0.001186	0.986039
MRA_0820	OTHER	0.024932	0.004441	0.004427	0.9662
MRA_3096	SP(Sec/SPI)	0.473365	0.268904	0.089988	0.167743	CS pos: 42-43. GVA-RE. Pr: 0.3236
MRA_3097	OTHER	0.04688	0.005809	0.022193	0.925117
MRA_3098	OTHER	0.060851	0.001719	0.029852	0.907578
MRA_3099	OTHER	0.053195	0.083221	0.009918	0.853667
MRA_0829	OTHER	0.01838	0.011949	0.004849	0.964823
MRA_0828	OTHER	0.197991	0.053187	0.005838	0.742984
MRA_0827	SP(Sec/SPI)	0.614592	0.012506	0.05215	0.320753	CS pos: 27-28. VGA-DF. Pr: 0.2547
MRA_0826	OTHER	0.143194	0.117925	0.03113	0.707751
MRA_0825	OTHER	0.002924	0.000156	0.000568	0.996351
MRA_0824	OTHER	0.01476	0.000759	0.000763	0.983718
MRA_0834	OTHER	0.006507	0.000146	0.000405	0.992942
MRA_0833	OTHER	0.088624	0.088071	0.014687	0.808618
MRA_0832	OTHER	0.020176	0.004305	0.001882	0.973637
MRA_0831	OTHER	0.012139	0.004383	0.00146	0.982018
MRA_0830	OTHER	0.023498	0.008772	0.039266	0.928464
MRA_0839	TAT(Tat/SPI)	0.239403	0.694886	0.002003	0.063708	CS pos: 29-30. ALA-AD. Pr: 0.8688
MRA_0838	OTHER	0.096545	0.023588	0.017199	0.862669
MRA_0837	OTHER	0.006106	0.000859	0.000612	0.992424
MRA_0836	OTHER	0.111182	0.017632	0.021794	0.849392
MRA_0835	TAT(Tat/SPI)	0.066751	0.687762	0.004831	0.240656	CS pos: 46-47. VRA-VC. Pr: 0.5900
MRA_1299	TAT(Tat/SPI)	0.27326	0.709799	0.012825	0.004116	CS pos: 33-34. ASA-SS. Pr: 0.8053
MRA_1298	OTHER	0.081269	0.082252	0.038795	0.797684
MRA_1297	OTHER	0.011756	0.002369	0.044778	0.941097
MRA_1296	OTHER	0.017223	0.002193	0.003826	0.976758
MRA_1295	OTHER	0.338173	0.14291	0.023481	0.495435
MRA_1294	OTHER	0.009646	0.00085	0.001654	0.987851
MRA_1293	OTHER	0.003177	0.000183	0.000304	0.996336
MRA_1292	OTHER	0.008011	0.000414	0.003696	0.987879
MRA_3000	SP(Sec/SPI)	0.619146	0.274583	0.075978	0.030293	CS pos: 32-33. RHA-DE. Pr: 0.3142
MRA_3001	OTHER	0.007819	0.002337	0.001106	0.988737
MRA_3002	OTHER	0.151807	0.284278	0.011578	0.552337
MRA_3003	OTHER	0.002749	0.000841	0.000755	0.995654
MRA_3004	OTHER	0.138398	0.018752	0.016942	0.825908
MRA_3005	OTHER	0.007238	0.003503	0.00087	0.988389
MRA_3006	OTHER	0.007884	0.003725	0.000587	0.987804
MRA_3007	OTHER	0.008595	0.00623	0.000965	0.98421
MRA_3008	OTHER	0.011897	0.005139	0.002416	0.980549
MRA_3009	OTHER	0.247014	0.209446	0.141025	0.402515
MRA_1279	SP(Sec/SPI)	0.744637	0.197451	0.031703	0.02621	CS pos: 34-35. AGA-NT. Pr: 0.5204
MRA_1278	LIPO(Sec/SPII)	0.004978	0.002204	0.991895	0.000923	CS pos: 24-25. IGG-CS. Pr: 0.9917
MRA_1277	TAT(Tat/SPI)	0.196112	0.802813	0.000747	0.000327	CS pos: 35-36. ANA-AD. Pr: 0.9547
MRA_1276	SP(Sec/SPI)	0.892311	0.105161	0.001275	0.001253	CS pos: 32-33. ADA-AA. Pr: 0.7649
MRA_1275	OTHER	0.009942	0.00402	0.002622	0.983416
MRA_1274	OTHER	0.003097	0.000803	0.00104	0.99506
MRA_1273	OTHER	0.008299	0.00663	0.00222	0.982851
MRA_1272	OTHER	0.004389	0.000694	0.000415	0.994502
MRA_1271	OTHER	0.004305	0.00385	0.002887	0.988959
MRA_1270	OTHER	0.013057	0.000373	0.002527	0.984043
MRA_1280	OTHER	0.02517	0.045338	0.017244	0.912248
MRA_1289	OTHER	0.014039	0.001116	0.001623	0.983221
MRA_1288	LIPO(Sec/SPII)	0.100755	0.055549	0.739272	0.104424	CS pos: 51-52. LTG-CS. Pr: 0.7117
MRA_1287	OTHER	0.031174	0.025328	0.014957	0.92854
MRA_1286	OTHER	0.00535	0.000248	0.001757	0.992645
MRA_1285	OTHER	0.011268	0.006253	0.002561	0.979918
MRA_1284	OTHER	0.028485	0.037561	0.004776	0.929178
MRA_1283	LIPO(Sec/SPII)	0.003606	0.000396	0.995717	0.000281	CS pos: 20-21. LTG-CT. Pr: 0.9960
MRA_1282	LIPO(Sec/SPII)	0.002606	0.000263	0.996928	0.000202	CS pos: 24-25. VAG-CS. Pr: 0.9975
MRA_1281	SP(Sec/SPI)	0.802748	0.022483	0.006835	0.167934	CS pos: 39-40. VNA-AI. Pr: 0.8015
MRA_1291	SP(Sec/SPI)	0.460362	0.091832	0.288865	0.158941	CS pos: 30-31. SLA-FS. Pr: 0.2865
MRA_1290	SP(Sec/SPI)	0.641138	0.208429	0.014069	0.136364	CS pos: 37-38. AYA-LP. Pr: 0.7588
MRA_3040	OTHER	0.013567	0.000327	0.009011	0.977095
MRA_3030	OTHER	0.312658	0.141017	0.151253	0.395071
MRA_3031	OTHER	0.012176	0.003422	0.002973	0.981429
MRA_3032	OTHER	0.009361	0.009956	0.001425	0.979258
MRA_3033	OTHER	0.015598	0.003046	0.000821	0.980535
MRA_3034	OTHER	0.320962	0.067488	0.027469	0.584081
MRA_3035	OTHER	0.046738	0.007074	0.004198	0.941989
MRA_3036	LIPO(Sec/SPII)	0.003073	0.000718	0.995853	0.000356	CS pos: 23-24. SSG-CA. Pr: 0.9957
MRA_3037	OTHER	0.016167	0.006296	0.000764	0.976773
MRA_3038	OTHER	0.03018	0.000621	0.018152	0.951048
MRA_3039	OTHER	0.177185	0.003348	0.003266	0.816201
MRA_1036A	OTHER	0.096701	0.013767	0.064963	0.824569
MRA_3050	OTHER	0.059077	0.009547	0.007403	0.923973
MRA_3051	OTHER	0.058276	0.032515	0.004466	0.904743
MRA_3041	OTHER	0.007685	0.003469	0.00166	0.987187
MRA_3042	OTHER	0.011802	0.011778	0.000862	0.975558
MRA_3043	OTHER	0.230524	0.019749	0.024642	0.725086
MRA_3044	OTHER	0.007081	0.000563	0.001531	0.990825
MRA_3045	OTHER	0.105912	0.020615	0.011803	0.86167
MRA_3046	LIPO(Sec/SPII)	0.04354	0.006024	0.947568	0.002869	CS pos: 19-20. IAA-CT. Pr: 0.9483
MRA_3047	OTHER	0.084883	0.012451	0.016168	0.886497
MRA_3048	OTHER	0.177093	0.103247	0.021461	0.698199
MRA_3049	OTHER	0.016464	0.034512	0.013974	0.935049
MRA_3010	OTHER	0.03656	0.025704	0.027415	0.91032
MRA_3011	SP(Sec/SPI)	0.636659	0.045693	0.026778	0.290869	CS pos: 25-26. VLA-DA. Pr: 0.4277
MRA_3012	OTHER	0.025676	0.015281	0.003056	0.955987
MRA_3013	OTHER	0.01783	0.002829	0.001991	0.97735
MRA_3014	TAT(Tat/SPI)	0.322549	0.413468	0.01406	0.249923	CS pos: 30-31. GSA-DS. Pr: 0.3649
MRA_3015	OTHER	0.009473	0.006167	0.001837	0.982522
MRA_3016	OTHER	0.003161	0.000768	0.000652	0.995418
MRA_3017	OTHER	0.005531	0.000549	0.004993	0.988928
MRA_3018	OTHER	0.04336	0.008968	0.017623	0.930049
MRA_3019	OTHER	0.00609	0.001512	0.000935	0.991462
MRA_3020	OTHER	0.00812	0.001189	0.001105	0.989586
MRA_3021	OTHER	0.008722	0.000744	0.001492	0.989042
MRA_3022	OTHER	0.034906	0.003001	0.008194	0.9539
MRA_3023	OTHER	0.048234	0.004226	0.037336	0.910205
MRA_3024	OTHER	0.013129	0.00033	0.001337	0.985204
MRA_3025	OTHER	0.015958	0.001214	0.002652	0.980177
MRA_3026	OTHER	0.114274	0.013356	0.017413	0.854958
MRA_3027	OTHER	0.045646	0.024611	0.08146	0.848284
MRA_3028	LIPO(Sec/SPII)	0.002452	0.000472	0.996552	0.000524	CS pos: 23-24. LAA-CS. Pr: 0.9973
MRA_3029	OTHER	0.010311	0.010847	0.003266	0.975576
MRA_0009	OTHER	0.033332	0.006472	0.005567	0.954629
MRA_0008	OTHER	0.010845	0.349021	0.001683	0.63845
MRA_1339	OTHER	0.015344	0.000907	0.001938	0.98181
MRA_0007	OTHER	0.039933	0.029822	0.026228	0.904018
MRA_1338	OTHER	0.01921	0.011564	0.002917	0.966308
MRA_0006	OTHER	0.0036	0.002534	0.0005	0.993365
MRA_1337	OTHER	0.12511	0.091659	0.096968	0.686263
MRA_0005	OTHER	0.012269	0.006945	0.008764	0.972022
MRA_1336	OTHER	0.004263	0.000423	0.000619	0.994694
MRA_0004	OTHER	0.037309	0.098585	0.009697	0.85441
MRA_1335	OTHER	0.019477	0.001371	0.006424	0.972728
MRA_0003	OTHER	0.009137	0.001894	0.001013	0.987956
MRA_1334	OTHER	0.003561	0.000588	0.000563	0.995288
MRA_0002	OTHER	0.027544	0.00645	0.003742	0.962264
MRA_1333	OTHER	0.165242	0.184376	0.007267	0.643115
MRA_0001	OTHER	0.016269	0.000987	0.006007	0.976736
MRA_1332	OTHER	0.096378	0.038281	0.010697	0.854644
MRA_1331	OTHER	0.013464	0.021191	0.000985	0.964359
MRA_1330	OTHER	0.064613	0.004698	0.001298	0.929391
MRA_2660	OTHER	0.004806	0.002125	0.00118	0.991889
MRA_2661	OTHER	0.006553	0.000542	0.000471	0.992435
MRA_2662	OTHER	0.010666	0.008516	0.001923	0.978896
MRA_2663	OTHER	0.345847	0.164928	0.010971	0.478254
MRA_2664	OTHER	0.029529	0.006034	0.005286	0.959151
MRA_2665	OTHER	0.05139	0.054324	0.010306	0.88398
MRA_2666	OTHER	0.175597	0.011498	0.016616	0.796288
MRA_2667	OTHER	0.012411	0.001723	0.000709	0.985157
MRA_2668	OTHER	0.006306	0.000425	0.011728	0.981541
MRA_2669	OTHER	0.099915	0.013096	0.030818	0.85617
MRA_0019	OTHER	0.163697	0.027313	0.011022	0.797967
MRA_0018	SP(Sec/SPI)	0.891379	0.008438	0.047784	0.052399	CS pos: 30-31. VFT-AD. Pr: 0.6251
MRA_1349	OTHER	0.14973	0.105035	0.065883	0.679352
MRA_0017	OTHER	0.011201	0.003117	0.002766	0.982916
MRA_1348	OTHER	0.010049	0.009603	0.000961	0.979387
MRA_0016	OTHER	0.002342	0.001292	0.000658	0.995707
MRA_1347	LIPO(Sec/SPII)	0.015438	0.001839	0.970251	0.012472	CS pos: 24-25. VLG-CS. Pr: 0.9705
MRA_0015	OTHER	0.012211	0.000863	0.000707	0.986219
MRA_1346	OTHER	0.036667	0.003156	0.002766	0.957412
MRA_0014	SP(Sec/SPI)	0.419501	0.09467	0.177194	0.308634	CS pos: 47-48. VSG-GT. Pr: 0.1660
MRA_1345	OTHER	0.021123	0.007752	0.016728	0.954398
MRA_0013	OTHER	0.002169	0.000444	0.002935	0.994453
MRA_1344	OTHER	0.004979	0.001262	0.001657	0.992102
MRA_0012	OTHER	0.014446	0.008318	0.004296	0.97294
MRA_1343	OTHER	0.030006	0.00332	0.004941	0.961733
MRA_0011	OTHER	0.012013	0.000985	0.003449	0.983554
MRA_1342	OTHER	0.118423	0.010961	0.028389	0.842227
MRA_0010	OTHER	0.055662	0.045463	0.142623	0.756252
MRA_1341	OTHER	0.13431	0.024469	0.018091	0.82313
MRA_1340	OTHER	0.015278	0.006139	0.005357	0.973227
MRA_2670	OTHER	0.006381	0.000619	0.000557	0.992442
MRA_2671	OTHER	0.06722	0.029685	0.005071	0.898024
MRA_2672	OTHER	0.005791	0.002994	0.004366	0.986849
MRA_2673	OTHER	0.032132	0.030494	0.031139	0.906235
MRA_2674	OTHER	0.145389	0.02938	0.044286	0.780946
MRA_2675	OTHER	0.013722	0.007857	0.003101	0.97532
MRA_2676	OTHER	0.00963	0.004563	0.00305	0.982757
MRA_2677	OTHER	0.014446	0.008318	0.004296	0.97294
MRA_2678	OTHER	0.012013	0.000985	0.003449	0.983554
MRA_2679	SP(Sec/SPI)	0.514465	0.208197	0.056695	0.220643	CS pos: 32-33. LIA-TP. Pr: 0.3393
MRA_1318	OTHER	0.006181	0.000628	0.000692	0.992499
MRA_1317	OTHER	0.013403	0.007395	0.001104	0.978097
MRA_1316	OTHER	0.004512	0.000304	0.000435	0.994748
MRA_1315	OTHER	0.135497	0.01847	0.013207	0.832826
MRA_1314	OTHER	0.011807	0.000278	0.004302	0.983613
MRA_1313	OTHER	0.1011	0.071872	0.073365	0.753663
MRA_1312	OTHER	0.003842	0.000328	0.000602	0.995228
MRA_1311	OTHER	0.01019	0.000337	0.00371	0.985764
MRA_1310	OTHER	0.018175	0.015348	0.006932	0.959546
MRA_2640	OTHER	0.008749	0.001037	0.015091	0.975124
MRA_2641	OTHER	0.010811	0.010339	0.01125	0.9676
MRA_2642	OTHER	0.032045	0.042577	0.006227	0.919151
MRA_2643	OTHER	0.336153	0.075354	0.023021	0.565473
MRA_2644	OTHER	0.012683	0.001723	0.002492	0.983102
MRA_2645	OTHER	0.00449	0.000544	0.000901	0.994065
MRA_2646	OTHER	0.02178	0.049116	0.004389	0.924715
MRA_2647	OTHER	0.027628	0.002811	0.005792	0.963769
MRA_2648	OTHER	0.019342	0.000645	0.006855	0.973159
MRA_1319	OTHER	0.001662	0.000437	0.000359	0.997542
MRA_2649	OTHER	0.085795	0.273073	0.029516	0.611616
MRA_1329	OTHER	0.069524	0.040278	0.001811	0.888387
MRA_1328	OTHER	0.032287	0.004052	0.003749	0.959911
MRA_1327	OTHER	0.018415	0.003126	0.010152	0.968308
MRA_1326	OTHER	0.032057	0.00342	0.005148	0.959376
MRA_1325	OTHER	0.158111	0.056792	0.081491	0.703606
MRA_1324	OTHER	0.009837	0.000665	0.002152	0.987346
MRA_1323	OTHER	0.08533	0.023805	0.020873	0.869993
MRA_1322	OTHER	0.016137	0.000935	0.00095	0.981978
MRA_1321	OTHER	0.018033	0.005027	0.005327	0.971613
MRA_1320	OTHER	0.065908	0.003262	0.013244	0.917585
MRA_2650	OTHER	0.005472	0.002025	0.000424	0.992079
MRA_2651	OTHER	0.009045	0.001126	0.002264	0.987565
MRA_2652	OTHER	0.03455	0.009376	0.003951	0.952123
MRA_2653	OTHER	0.004228	0.000355	0.008451	0.986965
MRA_2654	OTHER	0.018705	0.005025	0.002056	0.974214
MRA_2655	OTHER	0.013274	0.012269	0.003311	0.971145
MRA_2656	OTHER	0.055451	0.018427	0.023609	0.902513
MRA_2657	OTHER	0.005133	0.000645	0.000788	0.993434
MRA_2658	OTHER	0.048059	0.043823	0.017624	0.890494
MRA_2659	OTHER	0.193284	0.015835	0.005435	0.785446
MRA_0049	OTHER	0.028153	0.001774	0.012568	0.957505
MRA_0048	OTHER	0.014282	0.004989	0.001479	0.97925
MRA_1379	OTHER	0.012013	0.000985	0.003449	0.983554
MRA_0047	OTHER	0.009439	0.000878	0.000755	0.988929
MRA_1378	LIPO(Sec/SPII)	0.013934	0.035698	0.947167	0.003201	CS pos: 38-39. VAG-CG. Pr: 0.9458
MRA_0046	OTHER	0.017501	0.000892	0.011907	0.9697
MRA_1377	OTHER	0.013592	0.055356	0.001161	0.929892
MRA_0045	OTHER	0.013317	0.001436	0.001843	0.983404
MRA_1376	OTHER	0.00879	0.000801	0.001425	0.988984
MRA_0044	OTHER	0.019157	0.00619	0.00255	0.972103
MRA_1375	OTHER	0.025171	0.001874	0.003504	0.969451
MRA_0043	SP(Sec/SPI)	0.746865	0.193884	0.048619	0.010632	CS pos: 32-33. ASA-DP. Pr: 0.8223
MRA_1374	OTHER	0.021758	0.0041	0.001961	0.972182
MRA_0042	SP(Sec/SPI)	0.420211	0.054182	0.341353	0.184253	CS pos: 24-25. SLC-HT. Pr: 0.1355
MRA_1373	OTHER	0.004485	0.003925	0.000461	0.991129
MRA_0041	OTHER	0.005327	0.00156	0.002437	0.990675
MRA_1372	OTHER	0.013721	0.026854	0.002387	0.957039
MRA_0040	OTHER	0.014676	0.005136	0.00077	0.979419
MRA_1371	OTHER	0.016712	0.0061	0.003896	0.973292
MRA_1370	OTHER	0.043859	0.012312	0.006047	0.937782
MRA_0059	OTHER	0.006882	0.001638	0.001281	0.990199
MRA_0058	OTHER	0.010376	0.004849	0.00236	0.982414
MRA_1389	OTHER	0.003745	0.001596	0.001447	0.993212
MRA_0057	OTHER	0.020535	0.004212	0.003576	0.971677
MRA_1388	OTHER	0.010841	0.007209	0.001811	0.980139
MRA_0056	OTHER	0.004186	0.000255	0.000615	0.994943
MRA_1387	OTHER	0.022155	0.017208	0.127804	0.832833
MRA_0055	OTHER	0.005923	0.000567	0.002093	0.991417
MRA_1386	OTHER	0.115823	0.002055	0.003189	0.878933
MRA_0054	OTHER	0.028719	0.012934	0.009472	0.948876
MRA_1385	OTHER	0.136498	0.009559	0.022254	0.831688
MRA_0053	OTHER	0.204556	0.002365	0.021681	0.771398
MRA_1384	OTHER	0.069882	0.023472	0.014789	0.891858
MRA_0052	OTHER	0.026285	0.056625	0.010946	0.906145
MRA_1383	OTHER	0.005949	0.000619	0.000693	0.992739
MRA_0051	OTHER	0.025456	0.002715	0.004691	0.967139
MRA_1382	OTHER	0.024248	0.021967	0.0067	0.947085
MRA_0050	OTHER	0.020378	0.061256	0.002439	0.915928
MRA_1381	OTHER	0.017992	0.002463	0.005525	0.97402
MRA_1380	OTHER	0.014446	0.008318	0.004296	0.97294
MRA_1390	OTHER	0.002142	0.00014	0.000361	0.997357
MRA_0029	OTHER	0.008837	0.00099	0.002688	0.987486
MRA_0028	OTHER	0.004818	0.003264	0.000947	0.990972
MRA_1359	LIPO(Sec/SPII)	0.128765	0.041027	0.600469	0.229738	CS pos: 47-48. VAG-CK. Pr: 0.5202
MRA_0027	OTHER	0.014686	0.009084	0.003185	0.973045
MRA_1358	OTHER	0.11652	0.079269	0.012618	0.791594
MRA_0026	OTHER	0.02632	0.285671	0.007142	0.680867
MRA_1357	OTHER	0.035973	0.005391	0.056357	0.902279
MRA_0025	OTHER	0.010271	0.005637	0.004162	0.97993
MRA_1356	OTHER	0.009251	0.003235	0.000963	0.986551
MRA_0024	OTHER	0.010813	0.001927	0.003394	0.983865
MRA_1355	OTHER	0.007835	0.001219	0.00096	0.989986
MRA_0023	OTHER	0.105227	0.006182	0.006672	0.88192
MRA_1354	OTHER	0.006587	0.00083	0.001195	0.991389
MRA_0022	OTHER	0.00483	0.001421	0.000783	0.992966
MRA_1353	OTHER	0.009128	0.001321	0.001321	0.98823
MRA_0021	OTHER	0.022182	0.003582	0.003324	0.970912
MRA_1352	OTHER	0.118437	0.028463	0.025264	0.827836
MRA_0020	OTHER	0.014053	0.003618	0.001253	0.981076
MRA_1351	LIPO(Sec/SPII)	0.008893	0.005849	0.770443	0.214815	CS pos: 21-22. TCG-CL. Pr: 0.6764
MRA_1350	OTHER	0.007309	0.00035	0.013224	0.979116
MRA_2680	OTHER	0.002497	0.001198	0.000793	0.995511
MRA_2681	OTHER	0.002915	0.000414	0.000794	0.995878
MRA_2682	OTHER	0.016186	0.013558	0.004724	0.965532
MRA_2683	OTHER	0.020383	0.015254	0.005774	0.958589
MRA_2684	OTHER	0.052909	0.02059	0.004613	0.921888
MRA_2685	OTHER	0.001425	0.000262	0.000275	0.998038
MRA_2686	OTHER	0.078913	0.032393	0.017255	0.871438
MRA_2687	OTHER	0.021413	0.004871	0.003372	0.970344
MRA_2688	OTHER	0.003839	0.000353	0.00107	0.994738
MRA_2689	OTHER	0.01337	0.004137	0.005887	0.976606
MRA_0039	OTHER	0.00293	0.000332	0.000631	0.996107
MRA_0038	LIPO(Sec/SPII)	0.028226	0.002903	0.549841	0.41903	CS pos: 17-18. ISA-CT. Pr: 0.5605
MRA_1369	OTHER	0.015274	0.002104	0.002458	0.980164
MRA_0037	OTHER	0.028822	0.026109	0.004739	0.94033
MRA_1368	OTHER	0.005799	0.000645	0.000732	0.992823
MRA_0036	OTHER	0.001939	0.000153	0.000281	0.997627
MRA_1367	OTHER	0.009009	0.005814	0.000712	0.984465
MRA_0035	OTHER	0.004476	0.000952	0.000718	0.993854
MRA_1366	OTHER	0.006131	0.041863	0.001316	0.95069
MRA_0034	OTHER	0.038096	0.025478	0.015294	0.921132
MRA_1365	OTHER	0.015201	0.002635	0.001691	0.980474
MRA_0033	OTHER	0.004907	0.001552	0.00055	0.992991
MRA_1364	OTHER	0.007915	0.000565	0.001965	0.989554
MRA_0032	OTHER	0.048588	0.011704	0.0291	0.910608
MRA_1363	OTHER	0.001106	0.000203	0.000565	0.998127
MRA_0031	OTHER	0.007872	0.000951	0.002322	0.988855
MRA_1362	OTHER	0.006801	0.001252	0.000735	0.991212
MRA_0030	OTHER	0.006022	0.001729	0.001406	0.990843
MRA_1361	OTHER	0.004729	0.000891	0.001442	0.992938
MRA_1360	SP(Sec/SPI)	0.91307	0.08473	0.001285	0.000915	CS pos: 30-31. ARA-ET. Pr: 0.9810
MRA_2690	OTHER	0.132786	0.086301	0.020389	0.760524
MRA_2691	OTHER	0.00384	0.000965	0.000976	0.994219
MRA_2692	OTHER	0.046966	0.01022	0.002819	0.939995
MRA_2693	OTHER	0.01069	0.017354	0.004899	0.967057
MRA_2694	OTHER	0.117555	0.207017	0.005247	0.670181
MRA_2695	OTHER	0.002631	0.000271	0.00022	0.996877
MRA_2696	SP(Sec/SPI)	0.987879	0.001558	0.010089	0.000474	CS pos: 29-30. AWA-GD. Pr: 0.5892
MRA_2697	OTHER	0.015662	0.004901	0.007585	0.971851
MRA_2698	OTHER	0.022738	0.01941	0.119988	0.837864
MRA_2699	OTHER	0.009352	0.000873	0.00161	0.988165
MRA_0889	OTHER	0.005878	0.002922	0.007477	0.983724
MRA_3915	OTHER	0.047392	0.062104	0.007112	0.883392
MRA_0888	OTHER	0.00795	0.010337	0.003158	0.978555
MRA_3916	OTHER	0.169612	0.088033	0.047161	0.695194
MRA_0887	OTHER	0.045638	0.15305	0.004514	0.796798
MRA_3917	OTHER	0.115575	0.070423	0.030462	0.783539
MRA_0886	OTHER	0.006084	0.000851	0.005168	0.987897
MRA_3918	OTHER	0.019204	0.000692	0.000855	0.97925
MRA_0885	OTHER	0.158294	0.06474	0.020104	0.756862
MRA_3919	OTHER	0.011641	0.001661	0.002986	0.983712
MRA_0884	OTHER	0.035309	0.010936	0.003812	0.949943
MRA_0883	OTHER	0.036206	0.031063	0.010999	0.921731
MRA_0882	SP(Sec/SPI)	0.821661	0.006254	0.106056	0.066028	CS pos: 30-31. VRG-HG. Pr: 0.2291
MRA_0881	OTHER	0.033774	0.004717	0.004608	0.956901
MRA_0880	OTHER	0.003756	0.001389	0.000928	0.993928
MRA_3910	OTHER	0.002617	0.001436	0.000725	0.995222
MRA_3911	OTHER	0.13712	0.253727	0.004382	0.604771
MRA_3912	TAT(Tat/SPI)	0.357213	0.486529	0.021528	0.13473	CS pos: 42-43. AQA-VE. Pr: 0.3825
MRA_3913	OTHER	0.007922	0.017992	0.000642	0.973445
MRA_3914	OTHER	0.038689	0.038776	0.003063	0.919471
MRA_3926	OTHER	0.010102	0.000388	0.002207	0.987304
MRA_0899	OTHER	0.018832	0.008602	0.0016	0.970965
MRA_3927	OTHER	0.008003	0.002048	0.002751	0.987199
MRA_0898	OTHER	0.112821	0.026774	0.014366	0.846038
MRA_3928	OTHER	0.014594	0.002444	0.008709	0.974252
MRA_0897	OTHER	0.006594	0.000568	0.000857	0.991981
MRA_3929	OTHER	0.008047	0.001744	0.000499	0.989711
MRA_0896	SP(Sec/SPI)	0.919407	0.051126	0.023597	0.00587	CS pos: 31-32. GSA-AP. Pr: 0.4055
MRA_0895	OTHER	0.12123	0.006104	0.014787	0.85788
MRA_0894	OTHER	0.006171	0.000293	0.000572	0.992964
MRA_0893	OTHER	0.053901	0.01388	0.018556	0.913662
MRA_0892	OTHER	0.00573	0.000818	0.001353	0.992099
MRA_0891	OTHER	0.008836	0.045477	0.001583	0.944104
MRA_0890	OTHER	0.004085	0.000393	0.001255	0.994267
MRA_3920	OTHER	0.007547	0.004784	0.00182	0.985849
MRA_3921	OTHER	0.022704	0.009844	0.097571	0.86988
MRA_3922	SP(Sec/SPI)	0.973004	0.00128	0.025257	0.000458	CS pos: 21-22. ASA-IT. Pr: 0.8860
MRA_3923	OTHER	0.066013	0.070502	0.004892	0.858592
MRA_3924	OTHER	0.019672	0.006121	0.098	0.876207
MRA_3925	SP(Sec/SPI)	0.686419	0.299753	0.012385	0.001442	CS pos: 33-34. AQA-IP. Pr: 0.8504
MRA_0867	OTHER	0.00158	0.000244	0.000276	0.9979
MRA_3393A	TAT(Tat/SPI)	0.195926	0.770273	0.005386	0.028415	CS pos: 27-28. ARA-TP. Pr: 0.7552
MRA_0866	OTHER	0.196528	0.02934	0.053462	0.72067
MRA_0865	OTHER	0.019107	0.001371	0.001606	0.977916
MRA_0864	OTHER	0.010895	0.00023	0.001903	0.986973
MRA_0863	OTHER	0.026473	0.019272	0.003051	0.951204
MRA_0862	OTHER	0.002829	0.000489	0.000376	0.996306
MRA_0861	OTHER	0.005272	0.000592	0.000494	0.993642
MRA_0860	OTHER	0.098686	0.004783	0.096425	0.800106
MRA_0869	OTHER	0.013592	0.002938	0.002198	0.981272
MRA_0868	OTHER	0.007637	0.000642	0.002113	0.989608
MRA_0878	OTHER	0.008691	0.002405	0.000996	0.987908
MRA_3904	OTHER	0.075426	0.009168	0.029617	0.885789
MRA_0877	OTHER	0.007065	0.000858	0.010888	0.981189
MRA_3905	OTHER	0.006361	0.000303	0.001021	0.992315
MRA_0876	OTHER	0.066233	0.039254	0.016332	0.878182
MRA_3906	OTHER	0.00588	0.001586	0.001324	0.99121
MRA_0875	OTHER	0.019113	0.045719	0.003784	0.931384
MRA_3907	OTHER	0.126024	0.040791	0.005022	0.828162
MRA_0874	SP(Sec/SPI)	0.702491	0.291846	0.003278	0.002384	CS pos: 38-39. ATA-AT. Pr: 0.6552
MRA_3908	OTHER	0.006747	0.00019	0.008781	0.984282
MRA_0873	OTHER	0.003692	0.002273	0.000413	0.993622
MRA_3909	OTHER	0.018447	0.002758	0.001961	0.976834
MRA_0872	OTHER	0.118567	0.009103	0.014429	0.8579
MRA_0871	OTHER	0.038444	0.05994	0.003139	0.898477
MRA_0870	OTHER	0.011173	0.01965	0.001085	0.968091
MRA_3900	OTHER	0.116943	0.209192	0.058719	0.615146
MRA_3901	OTHER	0.055566	0.007401	0.025846	0.911186
MRA_3902	OTHER	0.092871	0.086122	0.166648	0.654358
MRA_0879	SP(Sec/SPI)	0.416911	0.214821	0.017762	0.350505	CS pos: 41-42. VLA-AG. Pr: 0.1205
MRA_3903	OTHER	0.080537	0.004065	0.060441	0.854957
MRA_2628	OTHER	0.007347	0.005799	0.017208	0.969646
MRA_3959	OTHER	0.003775	0.000765	0.000619	0.994841
MRA_2629	LIPO(Sec/SPII)	0.040715	0.009808	0.484423	0.465054	CS pos: 30-31. CAA-CG. Pr: 0.2630
MRA_3950	OTHER	0.003727	0.000622	0.00078	0.994871
MRA_2620	SP(Sec/SPI)	0.481562	0.212615	0.034757	0.271065	CS pos: 24-25. ATA-AQ. Pr: 0.1687
MRA_3951	OTHER	0.0053	0.001716	0.001613	0.991371
MRA_2621	OTHER	0.005653	0.007501	0.000904	0.985941
MRA_3952	OTHER	0.053398	0.086551	0.00519	0.854861
MRA_2622	OTHER	0.007445	0.002341	0.001101	0.989113
MRA_3953	OTHER	0.019959	0.001005	0.001427	0.97761
MRA_2623	OTHER	0.008529	0.000553	0.000933	0.989985
MRA_3954	OTHER	0.006465	0.002289	0.002184	0.989062
MRA_2624	OTHER	0.019687	0.00741	0.003684	0.96922
MRA_3955	OTHER	0.007276	0.000318	0.000464	0.991943
MRA_2625	OTHER	0.266643	0.012005	0.104021	0.617331
MRA_3956	OTHER	0.144164	0.403609	0.025212	0.427015
MRA_2626	OTHER	0.214803	0.089841	0.031767	0.663588
MRA_3957	OTHER	0.159221	0.056491	0.046912	0.737376
MRA_2627	TAT(Tat/SPI)	0.360646	0.375143	0.107007	0.157203	CS pos: 34-35. VGS-YI. Pr: 0.2218
MRA_3958	OTHER	0.009063	0.012261	0.002452	0.976224
MRA_1307	OTHER	0.006295	0.002062	0.001282	0.990362
MRA_2639	OTHER	0.018277	0.006842	0.002891	0.97199
MRA_1306	OTHER	0.084561	0.001682	0.075532	0.838225
MRA_1305	OTHER	0.011909	0.003197	0.002389	0.982505
MRA_1304	SP(Sec/SPI)	0.58745	0.038208	0.186576	0.187766	CS pos: 22-23. SSA-NL. Pr: 0.2103
MRA_1303	OTHER	0.04818	0.001598	0.003663	0.946559
MRA_1302	OTHER	0.004414	0.000422	0.000624	0.99454
MRA_1301	OTHER	0.014264	0.001967	0.001016	0.982753
MRA_1300	OTHER	0.062187	0.144676	0.008799	0.784338
MRA_3960	OTHER	0.000746	0.000505	0.002234	0.996514
MRA_2630	OTHER	0.085506	0.02086	0.017765	0.875869
MRA_3961	OTHER	0.074227	0.016733	0.018969	0.890071
MRA_2631	OTHER	0.018008	0.002963	0.004677	0.974352
MRA_3962	OTHER	0.012069	0.005674	0.007567	0.974689
MRA_2632	OTHER	0.006823	0.000717	0.002358	0.990103
MRA_3963	OTHER	0.102345	0.101907	0.038898	0.75685
MRA_2633	OTHER	0.017926	0.054489	0.000489	0.927097
MRA_2634	OTHER	0.013136	0.009591	0.0009	0.976374
MRA_2635	OTHER	0.009582	0.000509	0.001675	0.988233
MRA_2636	SP(Sec/SPI)	0.398199	0.30821	0.025819	0.267773	CS pos: 30-31. ASA-WD. Pr: 0.2134
MRA_1309	OTHER	0.058854	0.087115	0.003433	0.850599
MRA_2637	OTHER	0.363846	0.004409	0.097226	0.534519
MRA_1308	OTHER	0.065456	0.079088	0.00439	0.851066
MRA_2638	OTHER	0.138992	0.054924	0.005755	0.800328
MRA_2606	TAT(Tat/SPI)	0.000634	0.997916	0.000429	0.00102	CS pos: 52-53. GPA-VW. Pr: 0.4815
MRA_3937	OTHER	0.172373	0.076719	0.018454	0.732453
MRA_2607	OTHER	0.01687	0.006667	0.001805	0.974658
MRA_3938	OTHER	0.305909	0.179808	0.092614	0.421669
MRA_2608	OTHER	0.022614	0.000281	0.002173	0.974931
MRA_3939	OTHER	0.132329	0.094648	0.011823	0.7612
MRA_2609	OTHER	0.00475	0.003091	0.000408	0.991751
MRA_3930	OTHER	0.016495	0.00299	0.001155	0.979359
MRA_2600	OTHER	0.032591	0.002215	0.012634	0.95256
MRA_3931	OTHER	0.108879	0.17912	0.005509	0.706492
MRA_2601	OTHER	0.002886	0.002451	0.001285	0.993377
MRA_3932	OTHER	0.220954	0.053711	0.024291	0.701044
MRA_2602	OTHER	0.01478	0.002342	0.003682	0.979196
MRA_3933	OTHER	0.010755	0.000288	0.001819	0.987138
MRA_2603	OTHER	0.005463	0.000541	0.000605	0.993391
MRA_3934	OTHER	0.011496	0.000652	0.009476	0.978376
MRA_2604	OTHER	0.22061	0.082613	0.052655	0.644123
MRA_3935	OTHER	0.050835	0.066133	0.007039	0.875992
MRA_2605	SP(Sec/SPI)	0.734566	0.231058	0.004584	0.029791	CS pos: 45-46. ARA-DP. Pr: 0.7821
MRA_3936	SP(Sec/SPI)	0.441306	0.261695	0.034307	0.262692	CS pos: 34-35. MQA-GQ. Pr: 0.2469
MRA_2617	OTHER	0.219422	0.086364	0.047213	0.647001
MRA_3948	SP(Sec/SPI)	0.779615	0.21163	0.00452	0.004235	CS pos: 39-40. ALA-GE. Pr: 0.7903
MRA_2618	TAT(Tat/SPI)	0.151002	0.514337	0.004419	0.330242	CS pos: 45-46. ARA-GG. Pr: 0.5537
MRA_3949	OTHER	0.097994	0.032687	0.0173	0.852019
MRA_2619	OTHER	0.005958	0.001992	0.001123	0.990927
MRA_3940	SP(Sec/SPI)	0.468029	0.072136	0.046236	0.413599	CS pos: 53-54. TNA-RP. Pr: 0.0901
MRA_2610	OTHER	0.054689	0.002253	0.240455	0.702602
MRA_3941	OTHER	0.009011	0.000516	0.002915	0.987558
MRA_2611	OTHER	0.04759	0.014236	0.061756	0.876418
MRA_3942	TAT(Tat/SPI)	0.148216	0.392166	0.311401	0.148217	CS pos: 37-38. ALA-GC. Pr: 0.1613
MRA_2612	OTHER	0.01393	0.043266	0.003683	0.939122
MRA_3943	OTHER	0.006617	0.001212	0.000755	0.991416
MRA_2613	OTHER	0.023793	0.010605	0.01701	0.948593
MRA_3944	OTHER	0.009608	0.00457	0.000889	0.984932
MRA_2614	LIPO(Sec/SPII)	0.117326	0.067641	0.813476	0.001557	CS pos: 30-31. LTA-CS. Pr: 0.8138
MRA_3945	OTHER	0.006619	0.000411	0.003773	0.989198
MRA_2615	OTHER	0.02171	0.006139	0.004147	0.968004
MRA_3946	OTHER	0.014097	0.039555	0.002368	0.94398
MRA_2616	OTHER	0.058164	0.001294	0.040899	0.899643
MRA_3947	OTHER	0.073566	0.190323	0.051195	0.684916
MRA_0922	OTHER	0.053275	0.03912	0.003368	0.904237
MRA_0921	OTHER	0.006068	0.005702	0.000613	0.987617
MRA_0920	OTHER	0.008897	0.000497	0.001312	0.989294
MRA_3195	OTHER	0.035355	0.00286	0.050312	0.911473
MRA_3196	OTHER	0.113325	0.10534	0.126534	0.654802
MRA_3197	OTHER	0.020598	0.002012	0.008064	0.969326
MRA_3198	OTHER	0.115982	0.018425	0.012869	0.852724
MRA_3199	OTHER	0.072855	0.007202	0.213305	0.706638
MRA_0929	OTHER	0.027786	0.258221	0.005142	0.708851
MRA_0928	OTHER	0.00565	0.001371	0.000548	0.99243
MRA_0927	OTHER	0.122241	0.034435	0.004421	0.838903
MRA_0926	OTHER	0.09752	0.081608	0.032093	0.788779
MRA_0925	OTHER	0.053969	0.024124	0.001911	0.919996
MRA_0924	OTHER	0.054779	0.002107	0.004132	0.938982
MRA_0923	OTHER	0.386018	0.060632	0.102922	0.450428
MRA_0933	OTHER	0.005692	0.000943	0.001031	0.992334
MRA_0932	OTHER	0.06266	0.015078	0.00927	0.912992
MRA_0931	OTHER	0.025574	0.015035	0.031593	0.927798
MRA_0930	OTHER	0.049785	0.010928	0.026792	0.912495
MRA_0939	OTHER	0.003821	0.001013	0.001172	0.993994
MRA_0938	OTHER	0.001601	0.001869	0.015289	0.981241
MRA_0937	OTHER	0.015215	0.059598	0.017978	0.907209
MRA_0936	LIPO(Sec/SPII)	0.002048	0.000462	0.997044	0.000447	CS pos: 22-23. LSA-CG. Pr: 0.9973
MRA_0935	OTHER	0.168181	0.138753	0.021105	0.671961
MRA_0934	OTHER	0.013053	0.000991	0.001253	0.984703
MRA_0900	SP(Sec/SPI)	0.590707	0.014963	0.203574	0.190755	CS pos: 27-28. LSA-GI. Pr: 0.2371
MRA_3180	OTHER	0.052364	0.06152	0.003028	0.883088
MRA_3181	OTHER	0.016301	0.003626	0.003913	0.97616
MRA_3182	OTHER	0.006056	0.000431	0.000743	0.99277
MRA_3183	OTHER	0.011482	0.000631	0.001168	0.986719
MRA_3173	OTHER	0.002475	0.000389	0.000324	0.996811
MRA_3174	OTHER	0.01062	0.001332	0.000676	0.987372
MRA_3175	OTHER	0.008973	0.001784	0.00074	0.988503
MRA_3176	OTHER	0.003137	0.000759	0.000495	0.995608
MRA_3177	TAT(Tat/SPI)	0.230934	0.460209	0.022833	0.286023	CS pos: 35-36. GLA-EE. Pr: 0.1586
MRA_3178	SP(Sec/SPI)	0.640392	0.045073	0.095254	0.219282	CS pos: 25-26. VIA-SL. Pr: 0.1506
MRA_3179	OTHER	0.13595	0.061372	0.08763	0.715047
MRA_0909	OTHER	0.017761	0.006665	0.008328	0.967246
MRA_0908	SP(Sec/SPI)	0.515605	0.034605	0.089504	0.360286	CS pos: 27-28. VRP-VE. Pr: 0.1064
MRA_0907	OTHER	0.304834	0.044545	0.063685	0.586936
MRA_0906	OTHER	0.166548	0.02793	0.025744	0.779778
MRA_0905	OTHER	0.0116	0.053446	0.002542	0.932412
MRA_0904	OTHER	0.010882	0.00627	0.000656	0.982191
MRA_0903	OTHER	0.020754	0.015878	0.00264	0.960729
MRA_0902	OTHER	0.003446	0.001484	0.001367	0.993703
MRA_0901	OTHER	0.146571	0.057201	0.019457	0.776771
MRA_0911	OTHER	0.032281	0.009621	0.003694	0.954404
MRA_0910	OTHER	0.004309	0.002443	0.00056	0.992688
MRA_3190	OTHER	0.334138	0.042475	0.030987	0.5924
MRA_3191	OTHER	0.047452	0.005713	0.010505	0.93633
MRA_3192	OTHER	0.17855	0.368908	0.016379	0.436163
MRA_3193	OTHER	0.098326	0.063585	0.04177	0.796319
MRA_3194	OTHER	0.002869	0.000494	0.000546	0.996092
MRA_3184	OTHER	0.004702	0.000289	0.000974	0.994034
MRA_3185	OTHER	0.021967	0.001497	0.004231	0.972305
MRA_3186	OTHER	0.053422	0.276016	0.0142	0.656363
MRA_3187	OTHER	0.003155	0.000174	0.015947	0.980725
MRA_3188	OTHER	0.025334	0.003016	0.046843	0.924808
MRA_3189	OTHER	0.085093	0.016172	0.042149	0.856586
MRA_0919	OTHER	0.211096	0.017718	0.139849	0.631337
MRA_0918	OTHER	0.040311	0.004596	0.005367	0.949726
MRA_0917	OTHER	0.002943	0.000269	0.000269	0.996519
MRA_0916	OTHER	0.012486	0.000885	0.001842	0.984787
MRA_0915	OTHER	0.028235	0.000891	0.007232	0.963642
MRA_0914	LIPO(Sec/SPII)	0.11637	0.090908	0.560719	0.232003	CS pos: 54-55. LTG-CG. Pr: 0.4926
MRA_0913	TAT(Tat/SPI)	0.428987	0.526896	0.014596	0.029521	CS pos: 33-34. ALG-AD. Pr: 0.3862
MRA_0912	OTHER	0.031426	0.029863	0.001447	0.937264
MRA_0966	OTHER	0.011807	0.010703	0.003399	0.974091
MRA_0965	OTHER	0.008138	0.000617	0.001146	0.990099
MRA_0964	OTHER	0.103974	0.199051	0.007751	0.689223
MRA_0963	OTHER	0.077231	0.071533	0.009777	0.841459
MRA_0962	OTHER	0.034716	0.002814	0.01233	0.950141
MRA_0961	OTHER	0.027728	0.003142	0.011568	0.957562
MRA_0960	OTHER	0.031445	0.011016	0.009227	0.948311
MRA_0969	OTHER	0.03723	0.006699	0.016851	0.93922
MRA_0968	OTHER	0.006138	0.002956	0.001176	0.98973
MRA_0967	OTHER	0.0081	0.005519	0.000991	0.98539
MRA_0977	OTHER	0.049161	0.006635	0.142507	0.801697
MRA_0976	OTHER	0.022949	0.001871	0.001858	0.973322
MRA_0975	OTHER	0.10906	0.065527	0.029528	0.795885
MRA_0974	OTHER	0.007047	0.000334	0.000579	0.99204
MRA_0973	OTHER	0.012366	0.008524	0.002585	0.976525
MRA_0972	OTHER	0.058107	0.002933	0.004777	0.934183
MRA_0971	OTHER	0.006726	0.012553	0.000767	0.979954
MRA_0970	LIPO(Sec/SPII)	0.000643	0.000225	0.998675	0.000457	CS pos: 21-22. LAG-CI. Pr: 0.9994
MRA_1702A	OTHER	0.01071	0.001533	0.002863	0.984894
MRA_0979	OTHER	0.023645	0.001538	0.001706	0.97311
MRA_0978	OTHER	0.061666	0.050649	0.004884	0.882802
MRA_0944	OTHER	0.012006	0.006033	0.075561	0.9064
MRA_0943	OTHER	0.018503	0.001212	0.002351	0.977934
MRA_0942	LIPO(Sec/SPII)	0.001423	0.000176	0.998173	0.000228	CS pos: 23-24. AAG-CG. Pr: 0.9970
MRA_0941	OTHER	0.052398	0.060466	0.00643	0.880707
MRA_0940	LIPO(Sec/SPII)	0.003471	0.000651	0.995567	0.000311	CS pos: 22-23. LTA-CG. Pr: 0.9956
MRA_0949	OTHER	0.040287	0.002723	0.005948	0.951042
MRA_0948	OTHER	0.139509	0.02175	0.015834	0.822906
MRA_0947	OTHER	0.00879	0.001906	0.001064	0.98824
MRA_0946	OTHER	0.010002	0.002071	0.002548	0.985379
MRA_0945	SP(Sec/SPI)	0.872894	0.011783	0.009969	0.105355	CS pos: 22-23. VYS-AT. Pr: 0.4011
MRA_0955	OTHER	0.007241	0.009404	0.000496	0.982859
MRA_0954	OTHER	0.024945	0.013559	0.03765	0.923846
MRA_0953	OTHER	0.006381	0.000609	0.001074	0.991935
MRA_0952	TAT(Tat/SPI)	0.041987	0.85484	0.004447	0.098727	CS pos: 28-29. SFA-AQ. Pr: 0.6548
MRA_0951	OTHER	0.011226	0.002519	0.001596	0.984658
MRA_0950	OTHER	0.025365	0.0122	0.006893	0.955542
MRA_0959	OTHER	0.01509	0.030054	0.002947	0.951909
MRA_0958	OTHER	0.036884	0.003952	0.001713	0.957451
MRA_0957	OTHER	0.000611	0.000146	0.000113	0.99913
MRA_0956	OTHER	0.023379	0.017325	0.00101	0.958286
MRA_0089	OTHER	0.004268	0.002597	0.002602	0.990532
MRA_0088	OTHER	0.113152	0.145113	0.014579	0.727156
MRA_0087	OTHER	0.048508	0.005541	0.011201	0.93475
MRA_0086	OTHER	0.126639	0.021354	0.009383	0.842623
MRA_0085	OTHER	0.002628	0.000934	0.00029	0.996148
MRA_0084	OTHER	0.01076	0.005204	0.001768	0.982267
MRA_0083	OTHER	0.043643	0.027313	0.003834	0.925211
MRA_0082	OTHER	0.007453	0.001155	0.000805	0.990586
MRA_0092	OTHER	0.028533	0.010349	0.007461	0.953657
MRA_0091	OTHER	0.00676	0.002278	0.001372	0.98959
MRA_0090	OTHER	0.10282	0.0161	0.100082	0.780998
MRA_3110	OTHER	0.00885	0.002237	0.001036	0.987878
MRA_3111	OTHER	0.077717	0.001751	0.136975	0.783557
MRA_3112	OTHER	0.014975	0.001701	0.001538	0.981786
MRA_3113	OTHER	0.003364	0.002514	0.000509	0.993613
MRA_3114	OTHER	0.00384	0.004955	0.000431	0.990774
MRA_3115	LIPO(Sec/SPII)	0.04896	0.01459	0.80737	0.12908	CS pos: 20-21. GTA-CH. Pr: 0.8092
MRA_3116	OTHER	0.167396	0.282843	0.0756	0.474161
MRA_3117	OTHER	0.017719	0.017561	0.003146	0.961574
MRA_3118	OTHER	0.008383	0.000249	0.000682	0.990686
MRA_3119	OTHER	0.015937	0.002163	0.006401	0.975498
MRA_0099	OTHER	0.13671	0.018976	0.072331	0.771983
MRA_0098	OTHER	0.011821	0.003298	0.003119	0.981762
MRA_0097	OTHER	0.069171	0.028789	0.252067	0.649973
MRA_0096	OTHER	0.051308	0.015148	0.195036	0.738508
MRA_0095	OTHER	0.025567	0.00105	0.001078	0.972304
MRA_0094	OTHER	0.109702	0.114392	0.006706	0.7692
MRA_0093	OTHER	0.010485	0.005292	0.009671	0.974551
MRA_3120	OTHER	0.015168	0.003229	0.0027	0.978903
MRA_3121	OTHER	0.104136	0.001522	0.005995	0.888348
MRA_3122	OTHER	0.031063	0.006717	0.041005	0.921214
MRA_3123	OTHER	0.003298	0.001613	0.000665	0.994424
MRA_3124	OTHER	0.141834	0.124099	0.021288	0.712779
MRA_3125	OTHER	0.007147	0.004002	0.000689	0.988162
MRA_3126	OTHER	0.007436	0.007335	0.001487	0.983741
MRA_3127	OTHER	0.001209	0.001046	0.000303	0.997442
MRA_3128	SP(Sec/SPI)	0.677744	0.316792	0.003806	0.001659	CS pos: 27-28. AAA-EE. Pr: 0.9407
MRA_3129	OTHER	0.337394	0.055582	0.03359	0.573434
MRA_0069	OTHER	0.014255	0.012178	0.003864	0.969702
MRA_0068	OTHER	0.028586	0.004472	0.000663	0.966279
MRA_1399	OTHER	0.030603	0.005406	0.008803	0.955188
MRA_0067	OTHER	0.003709	0.001676	0.000735	0.99388
MRA_1398	OTHER	0.021029	0.015865	0.00687	0.956236
MRA_0066	OTHER	0.015963	0.002732	0.024146	0.957158
MRA_1397	OTHER	0.043947	0.023145	0.016944	0.915964
MRA_0065	TAT(Tat/SPI)	0.027261	0.970997	0.001034	0.000708	CS pos: 31-32. ATA-DP. Pr: 0.7287
MRA_1396	OTHER	0.044723	0.018581	0.006852	0.929844
MRA_0064	OTHER	0.057834	0.039724	0.03624	0.866201
MRA_1395	SP(Sec/SPI)	0.42748	0.310339	0.021758	0.240422	CS pos: 31-32. AAA-AP. Pr: 0.1882
MRA_0063	OTHER	0.013666	0.005977	0.006253	0.974104
MRA_1394	OTHER	0.019054	0.001897	0.00157	0.97748
MRA_0062	OTHER	0.010275	0.000678	0.005472	0.983575
MRA_1393	LIPO(Sec/SPII)	0.03206	0.007606	0.730473	0.229861	CS pos: 23-24. GQA-CE. Pr: 0.7426
MRA_0061	OTHER	0.015345	0.001704	0.002145	0.980806
MRA_1392	OTHER	0.046168	0.008201	0.007424	0.938207
MRA_0060	OTHER	0.004737	0.000653	0.000522	0.994088
MRA_1391	OTHER	0.053604	0.007411	0.008347	0.930638
MRA_0070	OTHER	0.033022	0.035862	0.001566	0.92955
MRA_0079	OTHER	0.010562	0.003276	0.002113	0.984049
MRA_0078	OTHER	0.007259	0.006429	0.001336	0.984976
MRA_0077	OTHER	0.009574	0.001119	0.000641	0.988666
MRA_0076	OTHER	0.007041	0.000813	0.00065	0.991495
MRA_0075	OTHER	0.073079	0.004607	0.037193	0.885121
MRA_0074	OTHER	0.241952	0.034877	0.033452	0.68972
MRA_0073	OTHER	0.008147	0.000932	0.001334	0.989587
MRA_0072	OTHER	0.011405	0.010387	0.002147	0.976061
MRA_0071	OTHER	0.058051	0.027116	0.0078	0.907034
MRA_0081	OTHER	0.031896	0.019689	0.020843	0.927572
MRA_0080	OTHER	0.011965	0.00654	0.002832	0.978663
MRA_3100	SP(Sec/SPI)	0.548159	0.05935	0.128624	0.263868	CS pos: 31-32. AAA-TP. Pr: 0.1992
MRA_3101	OTHER	0.008593	0.000493	0.000556	0.990359
MRA_3102	TAT(Tat/SPI)	0.09645	0.661574	0.014593	0.227383	CS pos: 30-31. ALA-IP. Pr: 0.5212
MRA_3103	OTHER	0.014075	0.001535	0.015976	0.968414
MRA_3104	OTHER	0.01781	0.01242	0.002627	0.967144
MRA_3105	OTHER	0.073121	0.03648	0.006046	0.884353
MRA_3106	OTHER	0.006756	0.00044	0.001494	0.99131
MRA_3107	OTHER	0.018569	0.252167	0.002909	0.726356
MRA_3108	OTHER	0.005014	0.001512	0.000807	0.992667
MRA_3109	OTHER	0.025142	0.004819	0.006395	0.963644
MRA_3160	OTHER	0.012493	0.001146	0.002034	0.984327
MRA_3161	OTHER	0.051829	0.007654	0.071712	0.868805
MRA_3151	OTHER	0.005528	0.000255	0.001014	0.993202
MRA_3152	OTHER	0.025635	0.000763	0.00121	0.972392
MRA_3153	OTHER	0.014991	0.00391	0.002788	0.978311
MRA_3154	OTHER	0.054063	0.040699	0.018385	0.886853
MRA_3155	OTHER	0.02757	0.094966	0.014485	0.862979
MRA_3156	OTHER	0.285281	0.034431	0.00511	0.675178
MRA_3157	OTHER	0.259707	0.352048	0.011683	0.376562
MRA_3158	OTHER	0.020044	0.006029	0.006917	0.96701
MRA_3159	OTHER	0.025091	0.00206	0.008482	0.964367
MRA_3170	OTHER	0.009552	0.001258	0.002073	0.987116
MRA_3171	OTHER	0.011622	0.000918	0.004113	0.983346
MRA_3172	OTHER	0.022675	0.029128	0.009441	0.938755
MRA_3162	OTHER	0.010757	0.02845	0.002068	0.958725
MRA_3163	OTHER	0.01799	0.002034	0.008015	0.971961
MRA_3164	OTHER	0.002352	0.000495	0.000187	0.996966
MRA_3165	OTHER	0.005661	0.002205	0.000539	0.991595
MRA_0949A	OTHER	0.194067	0.352899	0.0745	0.378533
MRA_3166	OTHER	0.018132	0.004652	0.002394	0.974822
MRA_3167	OTHER	0.206053	0.085773	0.004621	0.703552
MRA_3168	OTHER	0.204933	0.21093	0.012531	0.571607
MRA_3169	OTHER	0.354381	0.015167	0.114043	0.516409
MRA_3130	OTHER	0.018046	0.09489	0.018345	0.868719
MRA_3131	OTHER	0.014264	0.001132	0.002042	0.982563
MRA_3132	OTHER	0.018409	0.004424	0.001475	0.975691
MRA_3133	OTHER	0.044373	0.01081	0.020106	0.924711
MRA_3134	OTHER	0.005705	0.001737	0.000543	0.992015
MRA_3135	OTHER	0.194966	0.003707	0.032756	0.768571
MRA_3136	OTHER	0.00558	0.00032	0.001562	0.992538
MRA_3137	OTHER	0.006078	0.000672	0.001739	0.991511
MRA_3138	SP(Sec/SPI)	0.697198	0.021953	0.033274	0.247576	CS pos: 25-26. LKA-AD. Pr: 0.6025
MRA_3139	OTHER	0.027516	0.007479	0.004699	0.960305
MRA_3150	OTHER	0.01476	0.000759	0.000763	0.983718
MRA_3140	OTHER	0.087427	0.05866	0.114548	0.739365
MRA_3141	OTHER	0.00742	0.001591	0.000911	0.990077
MRA_3142	OTHER	0.007808	0.001889	0.001323	0.988981
MRA_3143	OTHER	0.011018	0.006178	0.001419	0.981385
MRA_3144	OTHER	0.02325	0.000867	0.036367	0.939516
MRA_3145	OTHER	0.007467	0.000761	0.001671	0.990101
MRA_3146	OTHER	0.016811	0.004346	0.001985	0.976858
MRA_3147	OTHER	0.098961	0.200791	0.00442	0.695828
MRA_3148	OTHER	0.021888	0.005054	0.002799	0.970259
MRA_3149	OTHER	0.002924	0.000156	0.000568	0.996351
MRA_0129	OTHER	0.049527	0.009413	0.025795	0.915265
MRA_0128	OTHER	0.074868	0.044533	0.005695	0.874904
MRA_1459	OTHER	0.333229	0.259693	0.022441	0.384637
MRA_0127	OTHER	0.033197	0.007963	0.007931	0.950909
MRA_1458	OTHER	0.00725	0.000971	0.001215	0.990564
MRA_0126	OTHER	0.00492	0.000701	0.0006	0.993779
MRA_1457	OTHER	0.013686	0.003304	0.002806	0.980205
MRA_0125	OTHER	0.02792	0.002644	0.009634	0.959802
MRA_1456	OTHER	0.036582	0.00319	0.026269	0.933959
MRA_0124	OTHER	0.012708	0.002267	0.001848	0.983178
MRA_1455	OTHER	0.031484	0.006171	0.001117	0.961227
MRA_0123	SP(Sec/SPI)	0.885668	0.004425	0.103444	0.006462	CS pos: 28-29. ATA-AV. Pr: 0.5940
MRA_1454	OTHER	0.044417	0.046063	0.011639	0.897881
MRA_0122	OTHER	0.032864	0.0224	0.009781	0.934955
MRA_1453	OTHER	0.011195	0.005728	0.001979	0.981097
MRA_0121	OTHER	0.01116	0.002251	0.001704	0.984885
MRA_1452	OTHER	0.02063	0.00127	0.003337	0.974763
MRA_0120	OTHER	0.003172	0.000506	0.000405	0.995917
MRA_1451	OTHER	0.013449	0.003589	0.002549	0.980413
MRA_1450	OTHER	0.109523	0.04497	0.053215	0.792293
MRA_2780	OTHER	0.049476	0.030351	0.002792	0.917381
MRA_2781	OTHER	0.0052	0.000592	0.000568	0.993639
MRA_2782	OTHER	0.006246	0.001545	0.002565	0.989644
MRA_2783	OTHER	0.025676	0.004313	0.002977	0.967034
MRA_2784	OTHER	0.009987	0.000683	0.003588	0.985742
MRA_2785	OTHER	0.005534	0.004114	0.001698	0.988654
MRA_2786	OTHER	0.167085	0.008709	0.00758	0.816626
MRA_2787	OTHER	0.025553	0.216793	0.00842	0.749235
MRA_2788	OTHER	0.021006	0.002318	0.015439	0.961237
MRA_2789	OTHER	0.005002	0.003772	0.001303	0.989923
MRA_0139	TAT(Tat/SPI)	0.00057	0.8366	0.162463	0.000367	CS pos: 40-41. EPA-SR. Pr: 0.2068
MRA_0771A	OTHER	0.008561	0.00042	0.00131	0.989709
MRA_0138	OTHER	0.001889	0.000379	0.000327	0.997406
MRA_1469	OTHER	0.01963	0.006789	0.002729	0.970852
MRA_0137	OTHER	0.022422	0.000747	0.003176	0.973655
MRA_1468	OTHER	0.076896	0.209493	0.017326	0.696286
MRA_0136	SP(Sec/SPI)	0.480892	0.350708	0.013385	0.155014	CS pos: 44-45. ATA-GA. Pr: 0.3502
MRA_1467	OTHER	0.014185	0.001245	0.001796	0.982774
MRA_0135	OTHER	0.05986	0.006124	0.036147	0.897869
MRA_1466	OTHER	0.003309	0.000815	0.004668	0.991207
MRA_0134	OTHER	0.00333	0.000731	0.000638	0.995301
MRA_1465	SP(Sec/SPI)	0.469311	0.125796	0.060102	0.344791	CS pos: 39-40. VTA-SG. Pr: 0.2623
MRA_0133	OTHER	0.007113	0.001846	0.000781	0.99026
MRA_1464	OTHER	0.01113	0.000733	0.002208	0.98593
MRA_0132	SP(Sec/SPI)	0.560439	0.435641	0.003008	0.000912	CS pos: 32-33. AQA-AP. Pr: 0.7861
MRA_1463	OTHER	0.007476	0.000336	0.000795	0.991393
MRA_0131	SP(Sec/SPI)	0.4595	0.216637	0.021551	0.302312	CS pos: 33-34. AAA-AP. Pr: 0.1350
MRA_1462	OTHER	0.004377	0.001808	0.000648	0.993167
MRA_0130	OTHER	0.013061	0.017486	0.001059	0.968395
MRA_1461	OTHER	0.294415	0.118494	0.023119	0.563973
MRA_1460	OTHER	0.074827	0.00506	0.008864	0.911249
MRA_2790	OTHER	0.009587	0.000432	0.003896	0.986085
MRA_2791	OTHER	0.128878	0.330861	0.023553	0.516708
MRA_2792	OTHER	0.01541	0.011232	0.005496	0.967862
MRA_2793	OTHER	0.204368	0.369229	0.030635	0.395768
MRA_2794	OTHER	0.151518	0.149742	0.01038	0.68836
MRA_2795	OTHER	0.083694	0.214713	0.007071	0.694521
MRA_2796	OTHER	0.015927	0.001993	0.003147	0.978933
MRA_2797	OTHER	0.009902	0.002787	0.050805	0.936506
MRA_2798	OTHER	0.17121	0.005015	0.012061	0.811715
MRA_2799	OTHER	0.006411	0.000574	0.000664	0.992351
MRA_0108	OTHER	0.035481	0.045083	0.238962	0.680473
MRA_1439	SP(Sec/SPI)	0.42808	0.130226	0.029894	0.411801	CS pos: 32-33. AAA-AI. Pr: 0.0960
MRA_0107	OTHER	0.361994	0.130344	0.057187	0.450475
MRA_1438	OTHER	0.001079	0.000174	0.000226	0.998521
MRA_0106	OTHER	0.006549	0.000738	0.000639	0.992074
MRA_1437	OTHER	0.004849	0.002641	0.000518	0.991991
MRA_0105	OTHER	0.009929	0.003107	0.000691	0.986273
MRA_1436	OTHER	0.029466	0.153773	0.007601	0.80916
MRA_0104	OTHER	0.003211	0.001106	0.000366	0.995317
MRA_1435	OTHER	0.058903	0.039703	0.031436	0.869958
MRA_0103	OTHER	0.008886	0.008061	0.001257	0.981796
MRA_1434	OTHER	0.045169	0.013938	0.058146	0.882747
MRA_0102	OTHER	0.03067	0.004706	0.003998	0.960626
MRA_1433	OTHER	0.12567	0.085155	0.182388	0.606787
MRA_0101	OTHER	0.005253	0.000445	0.001058	0.993243
MRA_1432	OTHER	0.017559	0.072514	0.002059	0.907868
MRA_0100	OTHER	0.098681	0.030025	0.127798	0.743496
MRA_1431	OTHER	0.039444	0.016388	0.024638	0.91953
MRA_1430	OTHER	0.019376	0.015349	0.006835	0.95844
MRA_2760	OTHER	0.061031	0.005429	0.281001	0.652539
MRA_2761	OTHER	0.008253	0.002634	0.001592	0.98752
MRA_2762	OTHER	0.01071	0.005498	0.002554	0.981239
MRA_2763	OTHER	0.007452	0.006201	0.001111	0.985236
MRA_2764	OTHER	0.138067	0.165472	0.045467	0.650994
MRA_2765	OTHER	0.122693	0.097325	0.004328	0.775654
MRA_2766	OTHER	0.046518	0.013275	0.004258	0.93595
MRA_2767	OTHER	0.093381	0.125182	0.008391	0.773047
MRA_2768	OTHER	0.003583	0.00061	0.00126	0.994547
MRA_2769	OTHER	0.028407	0.012939	0.03065	0.928004
MRA_0109	OTHER	0.009187	0.003192	0.003099	0.984522
MRA_0119	OTHER	0.017803	0.008361	0.001086	0.972751
MRA_2998A	OTHER	0.024201	0.002162	0.003825	0.969812
MRA_0118	SP(Sec/SPI)	0.698247	0.015969	0.032268	0.253516	CS pos: 29-30. VYA-TY. Pr: 0.5630
MRA_1449	SP(Sec/SPI)	0.476239	0.20455	0.041964	0.277247	CS pos: 37-38. VLA-AG. Pr: 0.0975
MRA_0117	OTHER	0.062223	0.016566	0.022677	0.898534
MRA_1448	OTHER	0.054441	0.113995	0.015672	0.815892
MRA_0116	OTHER	0.023595	0.002462	0.008713	0.96523
MRA_1447	OTHER	0.003069	0.000582	0.000941	0.995407
MRA_0115	SP(Sec/SPI)	0.716676	0.231825	0.015656	0.035842	CS pos: 33-34. AAA-AP. Pr: 0.2567
MRA_1446	OTHER	0.004996	0.000254	0.000546	0.994204
MRA_0114	OTHER	0.010241	0.000488	0.002016	0.987255
MRA_1445	OTHER	0.004292	0.001097	0.000945	0.993667
MRA_1444	OTHER	0.006455	0.000514	0.000701	0.992331
MRA_0112	SP(Sec/SPI)	0.497298	0.11301	0.033271	0.356421	CS pos: 39-40. TLA-SP. Pr: 0.0930
MRA_1443	SP(Sec/SPI)	0.849817	0.141979	0.002265	0.00594	CS pos: 33-34. AAA-DP. Pr: 0.9250
MRA_0111	OTHER	0.013692	0.001053	0.000803	0.984452
MRA_1442	SP(Sec/SPI)	0.882538	0.007993	0.040942	0.068527	CS pos: 30-31. VAA-KQ. Pr: 0.2942
MRA_0110	OTHER	0.018981	0.031343	0.007048	0.942628
MRA_1441	OTHER	0.049346	0.006385	0.011635	0.932634
MRA_1440	OTHER	0.009306	0.000699	0.001363	0.988632
MRA_2770	OTHER	0.011378	0.000501	0.002064	0.986057
MRA_2771	OTHER	0.009071	0.001101	0.001755	0.988073
MRA_2772	OTHER	0.017124	0.001054	0.004217	0.977604
MRA_2773	OTHER	0.003625	0.000302	0.001457	0.994616
MRA_2774	OTHER	0.027827	0.013789	0.004396	0.953988
MRA_2775	OTHER	0.033309	0.036054	0.005041	0.925597
MRA_2776	OTHER	0.017294	0.006216	0.008626	0.967863
MRA_2777	OTHER	0.003176	0.000285	0.000838	0.995702
MRA_2778	OTHER	0.346902	0.06283	0.039463	0.550804
MRA_2779	OTHER	0.019174	0.001629	0.001534	0.977663
MRA_0169	OTHER	0.041067	0.006225	0.009192	0.943516
MRA_0168	OTHER	0.125775	0.095324	0.008942	0.769958
MRA_1499	OTHER	0.111411	0.075954	0.006376	0.80626
MRA_0167	OTHER	0.149831	0.210564	0.014403	0.625202
MRA_1498	OTHER	0.068792	0.013056	0.310934	0.607219
MRA_0166	OTHER	0.016182	0.05283	0.003949	0.927039
MRA_1497	SP(Sec/SPI)	0.559586	0.008027	0.007783	0.424604	CS pos: 34-35. AEA-AV. Pr: 0.4741
MRA_0165	OTHER	0.061329	0.006627	0.056279	0.875766
MRA_1496	OTHER	0.026735	0.000989	0.128014	0.844262
MRA_0164	OTHER	0.016909	0.000683	0.023521	0.958887
MRA_1495	OTHER	0.009565	0.000957	0.001189	0.98829
MRA_0163	OTHER	0.027802	0.028059	0.001432	0.942708
MRA_1494	OTHER	0.004378	0.000557	0.000518	0.994547
MRA_0162	OTHER	0.008528	0.00211	0.001082	0.98828
MRA_1493	OTHER	0.023811	0.028091	0.003339	0.944759
MRA_0161	OTHER	0.004769	0.003402	0.001345	0.990484
MRA_1492	OTHER	0.028446	0.004981	0.001331	0.965242
MRA_1491	OTHER	0.001008	0.001588	0.004893	0.992511
MRA_1490	OTHER	0.004645	0.000923	0.000666	0.993766
MRA_1795A	OTHER	0.021458	0.041656	0.002975	0.93391
MRA_0179	SP(Sec/SPI)	0.77221	0.017197	0.069873	0.14072	CS pos: 38-39. LFA-KP. Pr: 0.5583
MRA_0178	OTHER	0.037501	0.000417	0.008979	0.953102
MRA_0177	OTHER	0.054612	0.001704	0.004785	0.938899
MRA_0176	OTHER	0.015714	0.011556	0.003034	0.969695
MRA_0175	OTHER	0.002481	0.000346	0.007453	0.98972
MRA_0174	OTHER	0.014373	0.002746	0.003193	0.979688
MRA_0173	OTHER	0.048361	0.013992	0.011354	0.926293
MRA_0172	OTHER	0.027494	0.004714	0.005031	0.962761
MRA_0171	OTHER	0.008339	0.000461	0.000499	0.990701
MRA_0170	OTHER	0.005881	0.000383	0.000773	0.992963
MRA_0180	OTHER	0.032479	0.001881	0.017413	0.948227
MRA_3200	OTHER	0.031406	0.041084	0.002237	0.925274
MRA_3201	OTHER	0.091564	0.110909	0.011751	0.785776
MRA_3202	OTHER	0.00835	0.000651	0.001943	0.989056
MRA_3203	OTHER	0.110806	0.028023	0.040483	0.820687
MRA_3204	OTHER	0.030344	0.006934	0.002696	0.960026
MRA_3205	OTHER	0.002023	0.000496	0.000325	0.997156
MRA_3206	OTHER	0.021914	0.015599	0.007171	0.955315
MRA_3207	OTHER	0.006775	0.005223	0.001162	0.98684
MRA_3208	OTHER	0.041857	0.020032	0.012133	0.925978
MRA_3209	OTHER	0.019259	0.027001	0.003713	0.950027
MRA_0149	OTHER	0.140367	0.205401	0.071686	0.582545
MRA_0148	OTHER	0.006228	0.000439	0.002814	0.99052
MRA_1479	OTHER	0.09976	0.014817	0.068391	0.817032
MRA_0147	OTHER	0.011153	0.002689	0.000657	0.9855
MRA_1478	OTHER	0.018154	0.002179	0.023356	0.956312
MRA_0146	OTHER	0.039752	0.006967	0.012681	0.9406
MRA_1477	SP(Sec/SPI)	0.355512	0.351816	0.01363	0.279042	CS pos: 33-34. AAA-AQ. Pr: 0.0844
MRA_0145	OTHER	0.010401	0.008369	0.001833	0.979397
MRA_1476	OTHER	0.006549	0.002134	0.000941	0.990376
MRA_0144	OTHER	0.067213	0.003651	0.016635	0.912501
MRA_1475	OTHER	0.003125	0.000203	0.000266	0.996406
MRA_0143	OTHER	0.005764	0.007454	0.001198	0.985584
MRA_1474	OTHER	0.012118	0.000721	0.000769	0.986392
MRA_0142	OTHER	0.009766	0.002455	0.001458	0.986321
MRA_1473	OTHER	0.002772	0.000995	0.000311	0.995922
MRA_0141	OTHER	0.008288	0.000971	0.001531	0.989209
MRA_1472	OTHER	0.028261	0.002672	0.000703	0.968364
MRA_0140	OTHER	0.010281	0.002338	0.001333	0.986048
MRA_1471	OTHER	0.01191	0.001944	0.001433	0.984713
MRA_1470	OTHER	0.027238	0.005155	0.002016	0.965592
MRA_0159	OTHER	0.29464	0.268317	0.017493	0.41955
MRA_0158	OTHER	0.031338	0.009222	0.001664	0.957776
MRA_1489	OTHER	0.055421	0.014323	0.031403	0.898854
MRA_0157	OTHER	0.018531	0.00751	0.00104	0.972918
MRA_1488	SP(Sec/SPI)	0.981782	0.00946	0.006903	0.001855	CS pos: 31-32. ADA-EP. Pr: 0.9299
MRA_0156	OTHER	0.008484	0.000401	0.001052	0.990064
MRA_1487	SP(Sec/SPI)	0.90401	0.061625	0.029095	0.005269	CS pos: 39-40. ATA-DP. Pr: 0.8630
MRA_0155	OTHER	0.032728	0.018808	0.006244	0.942221
MRA_1486	OTHER	0.036761	0.012693	0.002269	0.948277
MRA_0154	OTHER	0.017497	0.009137	0.003286	0.97008
MRA_1485	OTHER	0.008738	0.000667	0.00118	0.989415
MRA_0153	OTHER	0.12441	0.040537	0.016048	0.819005
MRA_1484	OTHER	0.005055	0.004	0.001991	0.988953
MRA_0152	OTHER	0.101179	0.354213	0.006096	0.538512
MRA_1483	OTHER	0.047852	0.090896	0.018064	0.843188
MRA_0151	OTHER	0.09239	0.031804	0.023785	0.852021
MRA_1482	OTHER	0.01374	0.003261	0.002452	0.980546
MRA_0150	OTHER	0.01146	0.00054	0.014217	0.973783
MRA_1481	OTHER	0.02382	0.002381	0.002088	0.971711
MRA_1480	OTHER	0.020677	0.006678	0.003075	0.969569
MRA_2705	OTHER	0.035107	0.006938	0.012401	0.945554
MRA_2706	OTHER	0.019744	0.026782	0.006568	0.946906
MRA_2707	OTHER	0.002857	0.000302	0.000509	0.996331
MRA_2708	OTHER	0.015154	0.070865	0.00216	0.911821
MRA_2709	OTHER	0.019161	0.005362	0.003509	0.971968
MRA_2700	LIPO(Sec/SPII)	0.222441	0.02371	0.748602	0.005246	CS pos: 29-30. LAA-CV. Pr: 0.5786
MRA_2701	OTHER	0.078037	0.089989	0.044164	0.78781
MRA_2702	OTHER	0.097117	0.005731	0.004061	0.893091
MRA_2703	OTHER	0.019441	0.003485	0.001909	0.975166
MRA_2704	OTHER	0.192997	0.01155	0.008747	0.786706
MRA_2716	OTHER	0.017302	0.003189	0.00161	0.977899
MRA_2717	OTHER	0.02994	0.004822	0.011131	0.954107
MRA_2718	OTHER	0.042443	0.005112	0.007831	0.944615
MRA_2719	OTHER	0.016924	0.00055	0.003126	0.9794
MRA_2074A	OTHER	0.009943	0.002611	0.005907	0.981538
MRA_2710	OTHER	0.007994	0.060464	0.000616	0.930926
MRA_2711	OTHER	0.017381	0.00281	0.001757	0.978052
MRA_2712	OTHER	0.033334	0.000756	0.081582	0.884328
MRA_2713	OTHER	0.039819	0.000936	0.0992	0.860045
MRA_2714	OTHER	0.013127	0.00058	0.006444	0.979848
MRA_2715	OTHER	0.034512	0.007682	0.008922	0.948884
MRA_0988	OTHER	0.004689	0.000568	0.000393	0.99435
MRA_0987	OTHER	0.321152	0.063601	0.021922	0.593324
MRA_0986	OTHER	0.029326	0.060561	0.030088	0.880025
MRA_0985	OTHER	0.336153	0.075354	0.023021	0.565473
MRA_0984	OTHER	0.342307	0.072171	0.025356	0.560166
MRA_0983	OTHER	0.003563	0.0002	0.0006	0.995637
MRA_0982	OTHER	0.054382	0.107004	0.003144	0.83547
MRA_0981	OTHER	0.01508	0.003064	0.003324	0.978532
MRA_0980	OTHER	0.215905	0.102894	0.023325	0.657876
MRA_0989	OTHER	0.019406	0.003331	0.009867	0.967395
MRA_0999	OTHER	0.012432	0.004168	0.00471	0.97869
MRA_0998	OTHER	0.010566	0.001602	0.005732	0.982099
MRA_0997	OTHER	0.102124	0.246007	0.022347	0.629523
MRA_0996	OTHER	0.007089	0.000951	0.00066	0.9913
MRA_0995	SP(Sec/SPI)	0.877977	0.030221	0.029946	0.061856	CS pos: 32-33. AVA-AD. Pr: 0.6103
MRA_0515A	OTHER	0.019846	0.003397	0.0075	0.969258
MRA_0994	OTHER	0.180962	0.006403	0.014616	0.798019
MRA_0993	OTHER	0.014755	0.001758	0.000832	0.982655
MRA_0992	OTHER	0.12016	0.007294	0.011999	0.860547
MRA_0991	OTHER	0.010223	0.000647	0.001227	0.987903
MRA_0990	OTHER	0.082771	0.009006	0.013491	0.894732
MRA_1417	OTHER	0.243035	0.016504	0.006467	0.733994
MRA_2749	SP(Sec/SPI)	0.688923	0.300564	0.004513	0.006	CS pos: 35-36. VAA-SP. Pr: 0.6864
MRA_1416	OTHER	0.07018	0.147507	0.027163	0.755151
MRA_1415	OTHER	0.033556	0.014267	0.008221	0.943956
MRA_1414	OTHER	0.02888	0.018299	0.001918	0.950903
MRA_1413	OTHER	0.014474	0.009446	0.00234	0.97374
MRA_1412	OTHER	0.011415	0.00575	0.001194	0.981641
MRA_1411	OTHER	0.00429	0.000634	0.00093	0.994146
MRA_1410	OTHER	0.020545	0.003252	0.1437	0.832502
MRA_2740	OTHER	0.205444	0.01544	0.010512	0.768604
MRA_2741	OTHER	0.024528	0.006354	0.007416	0.961702
MRA_2742	OTHER	0.003535	0.002403	0.00037	0.993692
MRA_2743	OTHER	0.047922	0.030744	0.005646	0.915688
MRA_2744	OTHER	0.015575	0.01327	0.000694	0.970461
MRA_2745	OTHER	0.209847	0.080995	0.198686	0.510472
MRA_2746	OTHER	0.017343	0.027858	0.010016	0.944783
MRA_1419	OTHER	0.030408	0.000997	0.154353	0.814242
MRA_2747	OTHER	0.062313	0.11075	0.012567	0.81437
MRA_1418	OTHER	0.020798	0.001267	0.003081	0.974854
MRA_2748	OTHER	0.010609	0.027334	0.006593	0.955464
MRA_1428	SP(Sec/SPI)	0.923875	0.039554	0.007147	0.029424	CS pos: 33-34. ASA-DG. Pr: 0.6067
MRA_1427	LIPO(Sec/SPII)	0.005123	0.00171	0.992413	0.000754	CS pos: 27-28. LAA-CT. Pr: 0.9930
MRA_1426	OTHER	0.009503	0.000562	0.004055	0.98588
MRA_1425	OTHER	0.026636	0.003843	0.013988	0.955533
MRA_1424	OTHER	0.004073	0.000446	0.000877	0.994604
MRA_1423	OTHER	0.015012	0.005611	0.009778	0.969599
MRA_1422	OTHER	0.005003	0.008224	0.000417	0.986356
MRA_1421	OTHER	0.01482	0.001815	0.001045	0.98232
MRA_1420	LIPO(Sec/SPII)	0.000941	0.000377	0.998427	0.000255	CS pos: 26-27. VAG-CS. Pr: 0.9989
MRA_2750	OTHER	0.004799	0.000214	0.010317	0.984671
MRA_2751	OTHER	0.003181	0.000803	0.000409	0.995608
MRA_2752	OTHER	0.009149	0.001167	0.001632	0.988052
MRA_2753	OTHER	0.042845	0.057626	0.002541	0.896988
MRA_2754	OTHER	0.019238	0.004405	0.003019	0.973338
MRA_2755	OTHER	0.387708	0.037448	0.015386	0.559459
MRA_2756	OTHER	0.063586	0.012127	0.046375	0.877912
MRA_2757	OTHER	0.125676	0.104684	0.028996	0.740645
MRA_2758	OTHER	0.025673	0.001549	0.0025	0.970278
MRA_1429	OTHER	0.01026	0.005289	0.001986	0.982466
MRA_2759	OTHER	0.060885	0.007831	0.01231	0.918973
MRA_2727	OTHER	0.009854	0.007127	0.001066	0.981954
MRA_2728	OTHER	0.282707	0.015794	0.163949	0.537549
MRA_2729	OTHER	0.019578	0.028302	0.003993	0.948127
MRA_1842A	OTHER	0.04032	0.004069	0.049768	0.905843
MRA_2720	OTHER	0.013877	0.000444	0.003184	0.982495
MRA_2721	OTHER	0.046718	0.13113	0.030951	0.791201
MRA_2722	OTHER	0.025224	0.003602	0.002733	0.968441
MRA_2723	OTHER	0.010644	0.021543	0.003637	0.964175
MRA_2724	OTHER	0.017596	0.004909	0.003562	0.973933
MRA_2725	OTHER	0.02606	0.057033	0.001564	0.915343
MRA_2726	OTHER	0.069079	0.000891	0.025383	0.904647
MRA_1406	OTHER	0.003844	0.001204	0.002122	0.992831
MRA_2738	OTHER	0.005923	0.005446	0.000805	0.987825
MRA_1405	SP(Sec/SPI)	0.493183	0.053937	0.027363	0.425517	CS pos: 36-37. AAA-TD. Pr: 0.1197
MRA_2739	OTHER	0.002841	0.001566	0.000445	0.995149
MRA_1404	OTHER	0.008213	0.001388	0.001196	0.989204
MRA_1403	OTHER	0.007177	0.002557	0.001445	0.988821
MRA_1402	OTHER	0.063682	0.011505	0.01834	0.906472
MRA_1401	OTHER	0.004877	0.00204	0.000696	0.992387
MRA_1400	OTHER	0.049253	0.006951	0.168817	0.77498
MRA_2730	OTHER	0.017843	0.004013	0.001325	0.976819
MRA_2731	OTHER	0.102597	0.291164	0.054034	0.552204
MRA_2732	OTHER	0.0376	0.027094	0.011166	0.92414
MRA_2733	OTHER	0.047355	0.002045	0.00703	0.94357
MRA_2734	OTHER	0.161058	0.121453	0.153788	0.563701
MRA_1409	OTHER	0.002643	0.000223	0.000699	0.996435
MRA_2735	OTHER	0.031136	0.019061	0.006984	0.94282
MRA_1408	OTHER	0.027219	0.001473	0.000893	0.970415
MRA_2736	OTHER	0.043233	0.013559	0.005724	0.937484
MRA_1407	OTHER	0.015212	0.014605	0.000714	0.969469
MRA_2737	OTHER	0.006952	0.001537	0.002354	0.989157
MRA_2038A	OTHER	0.014649	0.002923	0.003621	0.978807
MRA_3294	OTHER	0.037148	0.012888	0.0053	0.944664
MRA_3295	OTHER	0.023929	0.000953	0.006435	0.968683
MRA_3296	OTHER	0.071773	0.012767	0.009514	0.905947
MRA_3297	OTHER	0.045241	0.256168	0.003425	0.695166
MRA_3298	OTHER	0.003549	0.000496	0.000365	0.995589
MRA_3299	OTHER	0.156739	0.010969	0.056008	0.776284
MRA_0608A	OTHER	0.026259	0.000907	0.007806	0.965027
MRA_0386A	OTHER	0.395907	0.099545	0.038306	0.466242
MRA_3230	OTHER	0.025274	0.119836	0.010641	0.84425
MRA_3231	OTHER	0.007772	0.004505	0.001363	0.98636
MRA_3232	OTHER	0.032037	0.02123	0.008934	0.937799
MRA_3233	OTHER	0.010996	0.002138	0.001996	0.98487
MRA_3234	OTHER	0.045297	0.05585	0.014621	0.884233
MRA_3235	OTHER	0.086724	0.004002	0.047508	0.861767
MRA_3236	OTHER	0.019662	0.003618	0.002975	0.973745
MRA_3237	OTHER	0.028243	0.002783	0.01104	0.957934
MRA_3238	OTHER	0.329535	0.074288	0.018565	0.577611
MRA_3239	OTHER	0.042613	0.020681	0.010723	0.925982
MRA_3240	OTHER	0.004857	0.000651	0.000563	0.99393
MRA_3241	OTHER	0.020189	0.002785	0.003084	0.973942
MRA_3242	OTHER	0.016355	0.015569	0.004214	0.963862
MRA_3243	OTHER	0.056989	0.010295	0.01296	0.919756
MRA_3244	OTHER	0.031613	0.014822	0.007511	0.946054
MRA_3245	SP(Sec/SPI)	0.887607	0.022969	0.03923	0.050194	CS pos: 37-38. AAA-QT. Pr: 0.6505
MRA_3246	OTHER	0.017528	0.007866	0.001664	0.972943
MRA_3247	OTHER	0.032515	0.009401	0.000388	0.957697
MRA_3248	OTHER	0.29603	0.078311	0.217566	0.408093
MRA_3249	OTHER	0.015626	0.002669	0.00144	0.980264
MRA_0189	OTHER	0.012318	0.002036	0.003594	0.982053
MRA_0188	OTHER	0.10739	0.009388	0.014781	0.868441
MRA_0187	SP(Sec/SPI)	0.445948	0.222796	0.324799	0.006457	CS pos: 44-45. ARA-AD. Pr: 0.6124
MRA_0186	OTHER	0.020935	0.018613	0.003949	0.956503
MRA_0185	LIPO(Sec/SPII)	0.062037	0.270953	0.35512	0.311889	CS pos: 45-46. ISA-CA. Pr: 0.3681
MRA_0184	OTHER	0.035192	0.006483	0.046286	0.912039
MRA_0183	OTHER	0.062728	0.054587	0.016468	0.866217
MRA_0182	OTHER	0.048812	0.005948	0.008125	0.937115
MRA_0181	LIPO(Sec/SPII)	0.004772	0.001017	0.992688	0.001523	CS pos: 30-31. LSS-CG. Pr: 0.9922
MRA_0191	OTHER	0.007392	0.002177	0.001396	0.989035
MRA_0190	OTHER	0.161818	0.053518	0.014473	0.77019
MRA_3210	OTHER	0.007709	0.001514	0.001186	0.989592
MRA_3211	OTHER	0.045087	0.00606	0.005556	0.943296
MRA_3212	OTHER	0.005011	0.012008	0.001127	0.981854
MRA_3213	OTHER	0.001145	0.001105	0.000237	0.997514
MRA_3214	OTHER	0.074654	0.039666	0.102753	0.782927
MRA_3215	OTHER	0.013407	0.005038	0.003214	0.978341
MRA_3216	OTHER	0.014728	0.003757	0.002525	0.97899
MRA_3677A	OTHER	0.02023	0.011871	0.010648	0.957251
MRA_3217	OTHER	0.007102	0.002684	0.002724	0.98749
MRA_3218	OTHER	0.014446	0.008318	0.004296	0.97294
MRA_3219	OTHER	0.012013	0.000985	0.003449	0.983554
MRA_0199	OTHER	0.023687	0.001247	0.125524	0.849542
MRA_0198	OTHER	0.006522	0.000325	0.001196	0.991957
MRA_0197	OTHER	0.013478	0.006583	0.001411	0.978528
MRA_0196	OTHER	0.0208	0.014494	0.002828	0.961878
MRA_0195	OTHER	0.005723	0.002831	0.000601	0.990845
MRA_0194	OTHER	0.04321	0.065648	0.015362	0.875779
MRA_0193	OTHER	0.010583	0.003958	0.002631	0.982828
MRA_0192	OTHER	0.029284	0.034449	0.003776	0.932491
MRA_3220	OTHER	0.002088	0.000314	0.000454	0.997144
MRA_3221	OTHER	0.057877	0.009193	0.065488	0.867441
MRA_3222	OTHER	0.100706	0.072405	0.007206	0.819683
MRA_3223	OTHER	0.006123	0.000422	0.001186	0.992269
MRA_3224	OTHER	0.011676	0.012709	0.008579	0.967036
MRA_3225	OTHER	0.023651	0.008141	0.007105	0.961103
MRA_3226	OTHER	0.1949	0.187797	0.025946	0.591357
MRA_3227	OTHER	0.246908	0.012243	0.015475	0.725374
MRA_3228	OTHER	0.406043	0.035091	0.024919	0.533947
MRA_3229	OTHER	0.023206	0.002892	0.005295	0.968607
MRA_3280	OTHER	0.282453	0.040502	0.01729	0.659756
MRA_3281	OTHER	0.003922	0.000474	0.000806	0.994797
MRA_3282	OTHER	0.001968	0.000206	0.001708	0.996118
MRA_3272	OTHER	0.060219	0.007069	0.004894	0.927819
MRA_3273	OTHER	0.010108	0.002446	0.002317	0.985128
MRA_3274	OTHER	0.260348	0.045045	0.016742	0.677864
MRA_3275	OTHER	0.005965	0.003072	0.001673	0.98929
MRA_3276	OTHER	0.057652	0.013031	0.020363	0.908954
MRA_3277	OTHER	0.093281	0.022308	0.050594	0.833816
MRA_3278	OTHER	0.00396	0.000446	0.000664	0.994931
MRA_3279	OTHER	0.098926	0.000609	0.029406	0.871058
MRA_3290	OTHER	0.010571	0.008088	0.001392	0.979949
MRA_3291	OTHER	0.027894	0.001173	0.006508	0.964425
MRA_3292	OTHER	0.099732	0.001616	0.011294	0.887357
MRA_3293	OTHER	0.004844	0.004166	0.002178	0.988812
MRA_3283	OTHER	0.05904	0.009535	0.056443	0.874982
MRA_3284	TAT(Tat/SPI)	0.397031	0.502415	0.006656	0.093897	CS pos: 41-42. AVA-AP. Pr: 0.4935
MRA_3285	LIPO(Sec/SPII)	0.01237	0.000271	0.986992	0.000366	CS pos: 15-16. LAG-CA. Pr: 0.9878
MRA_3286	OTHER	0.048305	0.005652	0.045991	0.900052
MRA_3287	OTHER	0.002354	0.000153	0.00023	0.997263
MRA_3288	OTHER	0.102632	0.065672	0.003901	0.827795
MRA_3289	OTHER	0.002598	0.000396	0.000307	0.996699
MRA_3260	OTHER	0.002857	0.000268	0.000278	0.996597
MRA_3250	OTHER	0.008194	0.00077	0.000925	0.990111
MRA_3251	SP(Sec/SPI)	0.531384	0.355716	0.014621	0.098279	CS pos: 37-38. ARA-TI. Pr: 0.5557
MRA_3252	OTHER	0.017755	0.006198	0.007475	0.968572
MRA_3253	OTHER	0.015104	0.003269	0.009498	0.972128
MRA_3254	OTHER	0.044934	0.02359	0.00951	0.921966
MRA_3255	OTHER	0.044964	0.004237	0.003303	0.947496
MRA_3256	OTHER	0.148162	0.043205	0.023151	0.785482
MRA_3257	OTHER	0.071284	0.006724	0.005212	0.91678
MRA_3258	OTHER	0.057036	0.00751	0.00271	0.932745
MRA_3259	OTHER	0.004445	0.000449	0.000437	0.994669
MRA_3270	OTHER	0.004709	0.006638	0.000736	0.987917
MRA_3271	OTHER	0.007348	0.006322	0.002526	0.983804
MRA_3261	OTHER	0.006163	0.001309	0.002777	0.989752
MRA_3262	OTHER	0.076637	0.283809	0.005898	0.633656
MRA_3263	OTHER	0.003235	0.002905	0.000354	0.993506
MRA_3264	OTHER	0.039693	0.030352	0.011869	0.918085
MRA_3265	OTHER	0.15104	0.030807	0.33465	0.483502
MRA_3266	OTHER	0.009845	0.002541	0.002096	0.985518
MRA_3267	OTHER	0.043802	0.003785	0.081008	0.871405
MRA_3268	OTHER	0.159693	0.123072	0.019116	0.698119
MRA_3269	OTHER	0.025271	0.01231	0.008554	0.953864
MRA_0249	OTHER	0.006635	0.000301	0.001042	0.992022
MRA_0248	OTHER	0.003629	0.002058	0.000759	0.993554
MRA_1579	OTHER	0.02857	0.000341	0.029868	0.941221
MRA_0247	OTHER	0.016294	0.010264	0.001297	0.972145
MRA_1578	SP(Sec/SPI)	0.959692	0.036676	0.002848	0.000784	CS pos: 30-31. AAA-DP. Pr: 0.5576
MRA_0246	LIPO(Sec/SPII)	0.007334	0.008602	0.983238	0.000827	CS pos: 19-20. VVA-CS. Pr: 0.9818
MRA_1577	OTHER	0.013024	0.00074	0.001756	0.984479
MRA_0245	OTHER	0.363839	0.021671	0.181216	0.433274
MRA_1576	OTHER	0.017236	0.00111	0.002071	0.979584
MRA_0244	SP(Sec/SPI)	0.815983	0.064492	0.083068	0.036457	CS pos: 30-31. VSP-DT. Pr: 0.2582
MRA_1575	OTHER	0.011305	0.000895	0.000735	0.987066
MRA_0243	OTHER	0.049927	0.011852	0.036011	0.90221
MRA_1574	OTHER	0.027749	0.006096	0.002753	0.963402
MRA_0242	OTHER	0.277135	0.050055	0.01923	0.653579
MRA_1573	OTHER	0.008846	0.001397	0.00153	0.988227
MRA_0241	OTHER	0.153919	0.168067	0.029184	0.648829
MRA_1572	OTHER	0.010357	0.008095	0.001052	0.980496
MRA_0240	OTHER	0.008787	0.005756	0.002062	0.983395
MRA_1571	OTHER	0.015318	0.01276	0.007757	0.964165
MRA_1570	OTHER	0.011849	0.001944	0.002362	0.983845
MRA_0259	OTHER	0.003825	0.000802	0.000842	0.994531
MRA_0258	OTHER	0.041581	0.007525	0.005091	0.945802
MRA_1589	OTHER	0.005658	0.00156	0.000916	0.991866
MRA_0257	OTHER	0.100276	0.110326	0.007134	0.782264
MRA_1588	OTHER	0.002619	0.001922	0.000648	0.99481
MRA_0256	OTHER	0.02931	0.000967	0.001985	0.967737
MRA_1587	OTHER	0.003189	0.0038	0.001156	0.991855
MRA_0255	OTHER	0.015783	0.001329	0.004051	0.978837
MRA_1586	OTHER	0.023803	0.016244	0.007753	0.9522
MRA_0254	OTHER	0.073254	0.051287	0.005191	0.870267
MRA_1585	OTHER	0.026093	0.039167	0.019382	0.915358
MRA_0253	OTHER	0.008382	0.001335	0.001136	0.989148
MRA_1584	OTHER	0.003187	0.000338	0.000518	0.995957
MRA_0252	OTHER	0.032829	0.022147	0.002944	0.94208
MRA_1583	TAT(Tat/SPI)	0.048815	0.507492	0.010072	0.433621	CS pos: 43-44. SLA-VA. Pr: 0.1519
MRA_0251	OTHER	0.00944	0.03219	0.001222	0.957148
MRA_1582	SP(Sec/SPI)	0.453124	0.019856	0.133184	0.393837	CS pos: 29-30. RQA-GI. Pr: 0.1210
MRA_0250	OTHER	0.089686	0.139965	0.013671	0.756678
MRA_1581	OTHER	0.011484	0.002038	0.002088	0.98439
MRA_1580	OTHER	0.010331	0.000631	0.001128	0.987911
MRA_0229	OTHER	0.004159	9.3e-05	0.00038	0.995367
MRA_0228	OTHER	0.073179	0.054936	0.020774	0.851111
MRA_1559	OTHER	0.009037	0.003637	0.00092	0.986406
MRA_0227	OTHER	0.057424	0.007654	0.022888	0.912034
MRA_1558	OTHER	0.003086	0.000375	0.000262	0.996277
MRA_0226	OTHER	0.011144	0.000742	0.00497	0.983144
MRA_1557	OTHER	0.067142	0.011076	0.07141	0.850371
MRA_0225	OTHER	0.023094	0.008869	0.012944	0.955093
MRA_1556	OTHER	0.005594	0.005866	0.001446	0.987094
MRA_0224	OTHER	0.031663	0.011217	0.004973	0.952147
MRA_1555	OTHER	0.061979	0.001924	0.002019	0.934079
MRA_0223	OTHER	0.01209	0.001834	0.001843	0.984234
MRA_1554	OTHER	0.003945	0.000286	0.000245	0.995523
MRA_0222	OTHER	0.046807	0.050927	0.071563	0.830704
MRA_1553	LIPO(Sec/SPII)	0.011003	0.000184	0.988385	0.000428	CS pos: 15-16. LSA-CA. Pr: 0.9892
MRA_0221	OTHER	0.112918	0.04173	0.037803	0.807549
MRA_1552	OTHER	0.06557	0.154459	0.004689	0.775282
MRA_0220	OTHER	0.006128	0.002228	0.001387	0.990257
MRA_1551	OTHER	0.05528	0.022103	0.008037	0.914581
MRA_1550	OTHER	0.09676	0.018097	0.020403	0.86474
MRA_2880	OTHER	0.004854	0.001285	0.00063	0.993232
MRA_2881	OTHER	0.005396	0.000295	0.000344	0.993965
MRA_1329A	OTHER	0.069498	0.04087	0.005843	0.883788
MRA_2882	OTHER	0.152108	0.160549	0.026801	0.660542
MRA_2883	OTHER	0.007308	0.006883	0.001072	0.984736
MRA_2884	OTHER	0.035434	0.058414	0.016504	0.889648
MRA_2885	OTHER	0.010853	0.001859	0.001035	0.986253
MRA_2886	OTHER	0.046391	0.012867	0.00464	0.936102
MRA_2887	OTHER	0.009094	0.017211	0.001647	0.972048
MRA_2888	OTHER	0.003875	0.000311	0.001089	0.994725
MRA_2889	LIPO(Sec/SPII)	0.00167	0.008853	0.988958	0.000519	CS pos: 24-25. MSG-CT. Pr: 0.9872
MRA_0239	OTHER	0.014379	0.000743	0.000751	0.984127
MRA_0238	OTHER	0.01213	0.000456	0.000399	0.987014
MRA_1569	OTHER	0.002454	0.000165	0.000372	0.997009
MRA_0237	SP(Sec/SPI)	0.44208	0.163029	0.031984	0.362908	CS pos: 29-30. IHG-ET. Pr: 0.3563
MRA_0870A	OTHER	0.018904	0.001253	0.009303	0.97054
MRA_1568	OTHER	0.004986	0.00379	0.00113	0.990094
MRA_0236	OTHER	0.045107	0.018231	0.001807	0.934855
MRA_1567	OTHER	0.026569	0.053197	0.020572	0.899662
MRA_0235	SP(Sec/SPI)	0.611897	0.009293	0.166435	0.212374	CS pos: 32-33. RIA-EI. Pr: 0.2836
MRA_1566	OTHER	0.015572	0.002159	0.003432	0.978837
MRA_0234	SP(Sec/SPI)	0.509189	0.043989	0.078249	0.368573	CS pos: 31-32. RDA-VS. Pr: 0.0431
MRA_1565	OTHER	0.028658	0.000828	0.000845	0.969668
MRA_0233	OTHER	0.063366	0.044662	0.013022	0.87895
MRA_1564	OTHER	0.058956	0.014632	0.01501	0.911401
MRA_0232	OTHER	0.00715	0.00629	0.001304	0.985256
MRA_1563	OTHER	0.023116	0.003055	0.002091	0.971738
MRA_0231	OTHER	0.050122	0.009971	0.003809	0.936098
MRA_1562	OTHER	0.032418	0.047488	0.017094	0.903
MRA_0230	OTHER	0.021137	0.017677	0.001334	0.959852
MRA_1561	OTHER	0.031849	0.003338	0.015971	0.948843
MRA_1560	TAT(Tat/SPI)	0.324948	0.326372	0.029461	0.319219	CS pos: 30-31. ASA-WT. Pr: 0.1023
MRA_2890	OTHER	0.006212	0.002171	0.000788	0.990829
MRA_2891	OTHER	0.006162	0.006601	0.002021	0.985216
MRA_2892	OTHER	0.006055	0.000861	0.001101	0.991984
MRA_2893	OTHER	0.128775	0.03981	0.020017	0.811399
MRA_2894	OTHER	0.144744	0.005137	0.167095	0.683024
MRA_2895	OTHER	0.117676	0.024253	0.00688	0.851192
MRA_2896	OTHER	0.004714	0.000291	0.001005	0.993991
MRA_2897	LIPO(Sec/SPII)	0.000796	0.000608	0.998221	0.000375	CS pos: 24-25. LAG-CS. Pr: 0.9979
MRA_2898	OTHER	0.054917	0.022383	0.004469	0.918231
MRA_2899	TAT(Tat/SPI)	0.021838	0.844054	0.049463	0.084645	CS pos: 30-31. SLA-TP. Pr: 0.4846
MRA_0289	OTHER	0.16223	0.074662	0.014355	0.748753
MRA_0288	OTHER	0.271312	0.095241	0.017845	0.615602
MRA_0287	SP(Sec/SPI)	0.460785	0.178594	0.023941	0.33668	CS pos: 33-34. AAA-AN. Pr: 0.1272
MRA_0286	OTHER	0.033968	0.077999	0.013757	0.874276
MRA_0285	OTHER	0.005129	0.000298	0.001384	0.993189
MRA_0284	OTHER	0.034992	0.02959	0.001997	0.933421
MRA_0283	OTHER	0.009702	0.010457	0.003179	0.976662
MRA_0282	OTHER	0.014493	0.000961	0.002776	0.981769
MRA_0281	OTHER	0.103121	0.125773	0.010572	0.760534
MRA_0280	OTHER	0.033218	0.084371	0.00919	0.873221
MRA_0290	OTHER	0.276558	0.041337	0.028151	0.653954
MRA_3310	OTHER	0.189436	0.17266	0.028499	0.609405
MRA_3311	OTHER	0.008874	0.002544	0.003264	0.985319
MRA_3312	OTHER	0.02953	0.0012	0.006053	0.963217
MRA_3313	OTHER	0.01247	0.006708	0.001167	0.979655
MRA_3314	OTHER	0.044897	0.008071	0.044858	0.902174
MRA_3315	OTHER	0.00446	0.000984	0.000759	0.993797
MRA_3316	OTHER	0.013266	0.001941	0.001046	0.983746
MRA_3317	OTHER	0.325876	0.0973	0.068147	0.508677
MRA_3318	OTHER	0.086673	0.049364	0.023402	0.840561
MRA_3319	OTHER	0.033249	0.001921	0.018874	0.945957
MRA_0299	OTHER	0.028361	0.004542	0.003519	0.963578
MRA_0298	OTHER	0.030641	0.032991	0.001857	0.934511
MRA_0297	OTHER	0.03052	0.005212	0.004216	0.960053
MRA_0296	OTHER	0.051229	0.040615	0.003742	0.904414
MRA_0295	OTHER	0.402433	0.049203	0.030166	0.518198
MRA_0294	SP(Sec/SPI)	0.484938	0.299586	0.027611	0.187865	CS pos: 31-32. ASA-AP. Pr: 0.3366
MRA_0293	OTHER	0.021631	0.001382	0.003329	0.973658
MRA_0292	OTHER	0.007665	0.009096	0.0021	0.981139
MRA_0291	OTHER	0.021577	0.016675	0.00492	0.956828
MRA_3320	OTHER	0.025278	0.079174	0.002744	0.892803
MRA_3321	OTHER	0.002857	0.000894	0.000615	0.995634
MRA_3322	OTHER	0.043907	0.01828	0.014945	0.922868
MRA_3323	OTHER	0.015713	0.001542	0.000908	0.981836
MRA_3324	OTHER	0.02751	0.004194	0.003424	0.964872
MRA_3325	OTHER	0.018348	0.005194	0.001509	0.974949
MRA_3326	OTHER	0.02284	0.006261	0.003635	0.967265
MRA_3327	OTHER	0.009303	0.005491	0.004152	0.981054
MRA_3328	OTHER	0.004645	0.002095	0.000653	0.992606
MRA_3329	OTHER	0.019359	0.00286	0.006352	0.971429
MRA_0269	OTHER	0.01276	0.005689	0.001725	0.979826
MRA_0268	OTHER	0.011715	0.003842	0.002365	0.982079
MRA_1599	OTHER	0.003006	0.000518	0.000597	0.995879
MRA_0267	OTHER	0.052046	0.010019	0.009422	0.928512
MRA_1598	OTHER	0.029025	0.004979	0.001209	0.964787
MRA_0266	OTHER	0.03537	0.012627	0.000695	0.951308
MRA_1597	OTHER	0.009908	0.001308	0.0019	0.986885
MRA_0265	OTHER	0.04459	0.033533	0.005157	0.91672
MRA_1596	OTHER	0.005085	0.000297	0.000794	0.993824
MRA_0264	OTHER	0.049709	0.036721	0.027471	0.886098
MRA_1595	OTHER	0.011768	0.005122	0.002834	0.980275
MRA_0263	OTHER	0.030981	0.006034	0.009144	0.953842
MRA_1594	OTHER	0.094193	0.036799	0.02763	0.841378
MRA_0262	OTHER	0.0166	0.000799	0.027101	0.9555
MRA_1593	OTHER	0.007183	0.000989	0.001278	0.990551
MRA_0261	OTHER	0.025091	0.014244	0.003452	0.957213
MRA_1592	OTHER	0.044583	0.043452	0.006284	0.905681
MRA_0260	OTHER	0.007249	0.001771	0.000917	0.990064
MRA_1591	OTHER	0.075254	0.020806	0.009727	0.894213
MRA_1590	OTHER	0.059931	0.030752	0.138296	0.771021
MRA_0279	OTHER	0.0152	0.001698	0.001592	0.98151
MRA_0278	OTHER	0.018731	0.01049	0.000593	0.970186
MRA_0277	OTHER	0.011566	0.001411	0.001714	0.985309
MRA_0276	OTHER	0.048153	0.184038	0.022357	0.745452
MRA_0275	OTHER	0.013616	0.000207	0.006046	0.980131
MRA_0274	OTHER	0.013223	0.00516	0.001988	0.979628
MRA_0273	TAT(Tat/SPI)	0.001089	0.53137	0.466925	0.000615	CS pos: 40-41. GAA-VT. Pr: 0.1468
MRA_0272	OTHER	0.01078	0.002906	0.00359	0.982723
MRA_0271	OTHER	0.02033	0.01652	0.003495	0.959656
MRA_0270	OTHER	0.006812	0.001489	0.001616	0.990083
MRA_3300	OTHER	0.01961	0.00158	0.001874	0.976937
MRA_3301	OTHER	0.01565	0.003152	0.001927	0.97927
MRA_3302	SP(Sec/SPI)	0.796889	0.132769	0.009167	0.061175	CS pos: 35-36. AHS-DA. Pr: 0.4634
MRA_3303	OTHER	0.017859	0.005699	0.001653	0.974789
MRA_3304	OTHER	0.158359	0.039605	0.029555	0.77248
MRA_3305	OTHER	0.154962	0.053367	0.006244	0.785428
MRA_3306	OTHER	0.088716	0.063491	0.011825	0.835967
MRA_3307	OTHER	0.169178	0.262422	0.01362	0.554779
MRA_3308	SP(Sec/SPI)	0.792363	0.025315	0.014074	0.168248	CS pos: 38-39. VRS-FE. Pr: 0.5549
MRA_3309	OTHER	0.013257	0.000804	0.001677	0.984263
MRA_2826	OTHER	0.038468	0.021239	0.006949	0.933344
MRA_2827	OTHER	0.013672	0.004234	0.004377	0.977716
MRA_2828	OTHER	0.01004	0.024303	0.003936	0.96172
MRA_2829	OTHER	0.051462	0.01519	0.012102	0.921247
MRA_2820	LIPO(Sec/SPII)	0.008857	0.000288	0.990473	0.000382	CS pos: 18-19. ATG-CG. Pr: 0.9897
MRA_2821	OTHER	0.03179	0.159105	0.002407	0.806698
MRA_2822	OTHER	0.010735	0.021986	0.001156	0.966123
MRA_2823	OTHER	0.324861	0.138536	0.059722	0.47688
MRA_2824	OTHER	0.087445	0.205465	0.026449	0.680641
MRA_2825	OTHER	0.024244	0.004917	0.003583	0.967255
MRA_1505	OTHER	0.016741	0.002836	0.003683	0.97674
MRA_2837	OTHER	0.019723	0.002643	0.00182	0.975814
MRA_1504	OTHER	0.022585	0.001105	0.013482	0.962828
MRA_2838	OTHER	0.012013	0.000985	0.003449	0.983554
MRA_1503	OTHER	0.261973	0.078302	0.014999	0.644727
MRA_2839	OTHER	0.014446	0.008318	0.004296	0.97294
MRA_1502	OTHER	0.010171	0.005074	0.003394	0.981361
MRA_1501	OTHER	0.027636	0.002772	0.014763	0.954829
MRA_1500	OTHER	0.000964	0.0001	0.011986	0.98695
MRA_1940A	OTHER	0.009561	0.00234	0.001399	0.986701
MRA_2830	OTHER	0.253354	0.002274	0.271911	0.472461
MRA_2831	OTHER	0.022089	0.004694	0.009316	0.963901
MRA_2832	OTHER	0.004851	0.000463	0.000575	0.994112
MRA_1509	OTHER	0.007807	0.001254	0.000421	0.990517
MRA_2833	OTHER	0.033485	0.006209	0.001322	0.958984
MRA_1508	OTHER	0.037743	0.00186	0.00595	0.954447
MRA_2834	OTHER	0.057233	0.030005	0.011638	0.901124
MRA_1507	OTHER	0.03291	0.022437	0.003221	0.941433
MRA_2835	OTHER	0.053261	0.215797	0.023005	0.707937
MRA_1506	OTHER	0.012482	0.00373	0.002845	0.980943
MRA_2836	OTHER	0.012644	0.007073	0.009717	0.970566
MRA_2804	OTHER	0.016284	0.028369	0.001294	0.954053
MRA_2805	SP(Sec/SPI)	0.619386	0.116347	0.015616	0.248651	CS pos: 27-28. ALA-AA. Pr: 0.4808
MRA_2806	OTHER	0.052681	0.054094	0.008348	0.884877
MRA_2807	OTHER	0.010818	0.027566	0.000925	0.960691
MRA_2808	LIPO(Sec/SPII)	0.009891	0.000232	0.989535	0.000342	CS pos: 18-19. ATG-CS. Pr: 0.9903
MRA_2809	OTHER	0.003537	0.000639	0.000975	0.994849
MRA_2800	OTHER	0.040173	0.038352	0.010081	0.911394
MRA_2801	OTHER	0.022269	0.002785	0.004052	0.970894
MRA_2802	OTHER	0.018608	0.000651	0.000704	0.980037
MRA_2803	OTHER	0.034658	0.011372	0.002649	0.951321
MRA_2815	OTHER	0.00919	0.003494	0.001061	0.986255
MRA_2816	OTHER	0.016436	0.011229	0.002435	0.9699
MRA_2817	OTHER	0.013351	0.005036	0.00279	0.978823
MRA_2818	OTHER	0.256989	0.013782	0.005701	0.723528
MRA_2819	OTHER	0.006493	0.000311	0.001848	0.991348
MRA_2810	OTHER	0.012847	0.001539	0.001475	0.984139
MRA_2811	OTHER	0.028348	0.00397	0.001699	0.965982
MRA_2812	OTHER	0.007777	0.003442	0.001348	0.987433
MRA_2813	OTHER	0.001336	0.000215	0.00031	0.998139
MRA_2814	OTHER	0.025952	0.001417	0.003763	0.968867
MRA_0207	OTHER	0.023428	0.002745	0.008883	0.964944
MRA_1538	OTHER	0.023221	0.005019	0.00241	0.96935
MRA_0206	OTHER	0.010427	0.000305	0.001026	0.988242
MRA_1537	OTHER	0.325127	0.005191	0.011799	0.657882
MRA_0205	OTHER	0.022428	0.00335	0.091231	0.882991
MRA_1536	OTHER	0.020789	0.00313	0.002364	0.973717
MRA_0204	OTHER	0.175153	0.158689	0.009604	0.656554
MRA_1535	OTHER	0.234659	0.053283	0.022546	0.689512
MRA_0203	OTHER	0.03995	0.006071	0.009509	0.94447
MRA_1534	SP(Sec/SPI)	0.424779	0.202773	0.037221	0.335228	CS pos: 49-50. AQA-AK. Pr: 0.5026
MRA_0202	OTHER	0.072013	0.273274	0.024449	0.630264
MRA_1533	OTHER	0.003558	0.000622	0.000445	0.995375
MRA_0201	OTHER	0.016155	0.013369	0.002826	0.967651
MRA_1532	OTHER	0.006827	0.00055	0.001088	0.991535
MRA_0200	OTHER	0.064368	0.153865	0.030079	0.751688
MRA_1531	OTHER	0.20708	0.019348	0.027441	0.74613
MRA_1530	OTHER	0.018414	0.000422	0.011675	0.969489
MRA_2860	OTHER	0.098403	0.360404	0.023319	0.517874
MRA_2861	OTHER	0.087118	0.008593	0.003376	0.900914
MRA_2862	OTHER	0.019484	0.037584	0.003428	0.939504
MRA_2863	OTHER	0.108092	0.012994	0.030568	0.848346
MRA_2864	OTHER	0.003984	0.001476	0.000595	0.993945
MRA_2865	OTHER	0.01282	0.003499	0.020124	0.963557
MRA_2866	TAT(Tat/SPI)	0.009908	0.619239	0.368427	0.002427	CS pos: 46-47. APA-VE. Pr: 0.2706
MRA_2867	OTHER	0.013358	0.002407	0.003166	0.981069
MRA_0209	OTHER	0.009872	0.003301	0.001409	0.985417
MRA_2868	OTHER	0.003524	0.000796	0.000689	0.994991
MRA_0208	OTHER	0.003974	0.002718	0.030527	0.962781
MRA_1539	LIPO(Sec/SPII)	0.014126	0.001623	0.697653	0.286598	CS pos: 23-24. GMG-CR. Pr: 0.7003
MRA_2869	OTHER	0.018244	0.003256	0.00405	0.97445
MRA_0218	OTHER	0.0131	0.097545	0.002775	0.88658
MRA_1549	OTHER	0.032523	0.157176	0.004987	0.805314
MRA_0217	OTHER	0.110705	0.031032	0.020969	0.837295
MRA_1548	OTHER	0.007168	0.000454	0.000714	0.991664
MRA_0216	OTHER	0.019365	0.01525	0.00538	0.960004
MRA_1547	OTHER	0.013897	0.006544	0.00441	0.975148
MRA_0215	OTHER	0.008313	0.002414	0.000849	0.988424
MRA_1546	OTHER	0.015871	0.021353	0.006052	0.956724
MRA_0214	OTHER	0.377709	0.004795	0.12487	0.492627
MRA_1545	OTHER	0.078149	0.053255	0.034273	0.834323
MRA_0213	OTHER	0.001575	0.000182	0.005547	0.992696
MRA_1544	OTHER	0.003135	0.000657	0.00112	0.995089
MRA_0212	OTHER	0.032511	0.002847	0.017766	0.946876
MRA_1543	OTHER	0.012202	0.000214	0.00095	0.986633
MRA_0211	SP(Sec/SPI)	0.590556	0.385519	0.016449	0.007476	CS pos: 36-37. ATG-AS. Pr: 0.3651
MRA_1542	OTHER	0.00727	0.0005	0.001327	0.990903
MRA_0210	SP(Sec/SPI)	0.471948	0.016584	0.086047	0.425421	CS pos: 34-35. TQS-GN. Pr: 0.1243
MRA_1541	OTHER	0.010813	0.001778	0.001377	0.986033
MRA_1540	OTHER	0.005278	0.000796	0.000635	0.99329
MRA_1899A	OTHER	0.015584	0.004387	0.003047	0.976982
MRA_2870	OTHER	0.202644	0.057684	0.021671	0.718001
MRA_2871	OTHER	0.236801	0.038538	0.070712	0.653949
MRA_2872	OTHER	0.03274	0.01377	0.002084	0.951405
MRA_2873	OTHER	0.0997	0.01967	0.028554	0.852076
MRA_2874	OTHER	0.002204	0.000273	0.001323	0.996199
MRA_2875	OTHER	0.075497	0.08399	0.016113	0.824401
MRA_2876	OTHER	0.27177	0.098108	0.022016	0.608106
MRA_2877	OTHER	0.026365	0.002442	0.016363	0.95483
MRA_2878	OTHER	0.108304	0.009603	0.005998	0.876094
MRA_2879	OTHER	0.008784	0.000487	0.001532	0.989196
MRA_0219	OTHER	0.00476	0.00049	0.000746	0.994003
MRA_1516	OTHER	0.00458	0.000284	0.000612	0.994524
MRA_2848	OTHER	0.028686	0.013176	0.019786	0.938353
MRA_1515	OTHER	0.026005	0.005785	0.010365	0.957845
MRA_2849	OTHER	0.008868	0.001837	0.002954	0.98634
MRA_1514	OTHER	0.00698	0.000488	0.001565	0.990966
MRA_1513	OTHER	0.013496	0.000895	0.000718	0.984891
MRA_1512	OTHER	0.002654	0.000446	0.000501	0.996399
MRA_1511	OTHER	0.050883	0.001567	0.001028	0.946522
MRA_1510	OTHER	0.006802	0.004281	0.001414	0.987502
MRA_2840	OTHER	0.007681	0.016582	0.000501	0.975237
MRA_2841	OTHER	0.003466	0.000156	0.000806	0.995571
MRA_2842	OTHER	0.006195	0.000864	0.001974	0.990967
MRA_2843	OTHER	0.021066	0.000754	0.023625	0.954555
MRA_2844	OTHER	0.033422	0.001329	0.003854	0.961396
MRA_1519	OTHER	0.046237	0.010413	0.043457	0.899892
MRA_2845	OTHER	0.115837	0.018194	0.033001	0.832967
MRA_1518	OTHER	0.00178	0.00014	0.000312	0.997768
MRA_2846	OTHER	0.014756	0.001614	0.00169	0.98194
MRA_1517	OTHER	0.00539	0.000411	0.002032	0.992167
MRA_2847	OTHER	0.023524	0.003654	0.002873	0.969949
MRA_1527	OTHER	0.010126	0.002178	0.001099	0.986597
MRA_2859	OTHER	0.039751	0.002174	0.010957	0.947118
MRA_1526	OTHER	0.043922	0.001744	0.002676	0.951658
MRA_1525	OTHER	0.008282	0.008511	0.001033	0.982173
MRA_1524	OTHER	0.078185	0.172559	0.00675	0.742506
MRA_1523	OTHER	0.007909	0.000718	0.001651	0.989722
MRA_1522	OTHER	0.048889	0.069052	0.055091	0.826968
MRA_1521	OTHER	0.006915	0.000534	0.000753	0.991798
MRA_1520	OTHER	0.025028	0.000979	0.003655	0.970338
MRA_1768D	SP(Sec/SPI)	0.559282	0.012447	0.108882	0.319388	CS pos: 39-40. ITA-ED. Pr: 0.2456
MRA_1768B	OTHER	0.011805	0.000694	0.002016	0.985486
MRA_1768C	OTHER	0.060693	0.023254	0.028592	0.88746
MRA_1768A	TAT(Tat/SPI)	0.001312	0.998002	0.000274	0.000412	CS pos: 39-40. AYG-AG. Pr: 0.5902
MRA_2850	OTHER	0.009597	0.001834	0.00143	0.987139
MRA_2851	OTHER	0.020007	0.012974	0.013651	0.953367
MRA_2852	OTHER	0.005544	0.003736	0.001249	0.989471
MRA_2853	OTHER	0.068559	0.091811	0.018712	0.820917
MRA_2854	OTHER	0.007016	0.00235	0.000617	0.990017
MRA_2855	OTHER	0.006921	0.000845	0.001099	0.991135
MRA_2856	TAT(Tat/SPI)	0.000542	0.912494	0.086589	0.000375	CS pos: 34-35. VKS-GS. Pr: 0.4021
MRA_1529	OTHER	0.017094	0.000992	0.020917	0.960997
MRA_2857	OTHER	0.067682	0.00835	0.023331	0.900637
MRA_1528	OTHER	0.024046	0.001587	0.001707	0.97266
MRA_2858	OTHER	0.037594	0.001652	0.002176	0.958577
MRA_2351A	OTHER	0.050724	0.024609	0.011234	0.913432
MRA_1020A	OTHER	0.088466	0.024079	0.022457	0.864997
MRA_2090	OTHER	0.024316	0.001238	0.053261	0.921185
MRA_2091	OTHER	0.008832	0.001716	0.000978	0.988474
MRA_2092	OTHER	0.01071	0.054931	0.001009	0.93335
MRA_2093	OTHER	0.007602	0.00265	0.001333	0.988415
MRA_2094	LIPO(Sec/SPII)	0.009006	0.019461	0.968064	0.003468	CS pos: 28-29. LAG-CA. Pr: 0.9693
MRA_2084	OTHER	0.042514	0.004033	0.006563	0.946889
MRA_2085	OTHER	0.024754	0.002392	0.005657	0.967197
MRA_2086	OTHER	0.005939	0.001711	0.001422	0.990928
MRA_2087	OTHER	0.034897	0.175939	0.006284	0.78288
MRA_2088	OTHER	0.008323	0.004188	0.001467	0.986023
MRA_2089	SP(Sec/SPI)	0.911211	0.085325	0.002575	0.000889	CS pos: 30-31. ADA-YQ. Pr: 0.5742
MRA_1817A	OTHER	0.050764	0.025599	0.013853	0.909784
MRA_2095	OTHER	0.052451	0.01114	0.006975	0.929434
MRA_2096	OTHER	0.34269	0.094462	0.043657	0.519191
MRA_2098	OTHER	0.064257	0.009239	0.025059	0.901445
MRA_2099	OTHER	0.140405	0.012642	0.012707	0.834246
MRA_3113A	OTHER	0.00784	0.010871	0.002555	0.978733
MRA_2903	SP(Sec/SPI)	0.854457	0.072142	0.003428	0.069973	CS pos: 37-38. AVA-AD. Pr: 0.7385
MRA_2904	OTHER	0.067111	0.032787	0.013983	0.886119
MRA_2905	OTHER	0.009329	0.002784	0.003025	0.984861
MRA_2906	OTHER	0.022283	0.001022	0.019804	0.956891
MRA_2907	OTHER	0.005984	0.003862	0.001324	0.988831
MRA_2908	OTHER	0.038132	0.013422	0.002855	0.945591
MRA_2909	OTHER	0.01032	0.000606	0.001219	0.987855
MRA_2900	SP(Sec/SPI)	0.971613	0.025282	0.002418	0.000687	CS pos: 30-31. AAA-GD. Pr: 0.8178
MRA_2901	OTHER	0.00992	0.000575	0.011366	0.97814
MRA_2902	OTHER	0.042807	0.008769	0.087013	0.861411
MRA_2914	OTHER	0.090067	0.026676	0.087221	0.796037
MRA_2915	OTHER	0.001492	9.1e-05	0.00021	0.998206
MRA_2916	SP(Sec/SPI)	0.966258	0.030621	0.0019	0.001221	CS pos: 36-37. AHA-DD. Pr: 0.9842
MRA_2917	OTHER	0.09871	0.048812	0.009155	0.843323
MRA_2918	OTHER	0.113787	0.236261	0.015269	0.634684
MRA_2919	OTHER	0.047434	0.058805	0.003964	0.889797
MRA_2910	OTHER	0.028508	0.01535	0.002594	0.953548
MRA_2911	OTHER	0.122975	0.197938	0.066947	0.612139
MRA_2912	OTHER	0.020401	0.017969	0.003652	0.957978
MRA_2913	OTHER	0.010385	0.0047	0.001241	0.983675
MRA_0265A	OTHER	0.047479	0.013191	0.039126	0.900204
MRA_3350	OTHER	0.00803	0.00323	0.001542	0.987198
MRA_2020	OTHER	0.005745	0.00068	0.001378	0.992196
MRA_3351	SP(Sec/SPI)	0.676207	0.089299	0.02443	0.210065	CS pos: 43-44. GLA-AS. Pr: 0.2074
MRA_2021	OTHER	0.028506	0.002846	0.034755	0.933892
MRA_3352	OTHER	0.009916	0.000397	0.001791	0.987897
MRA_2022	OTHER	0.005974	0.001652	0.000886	0.991488
MRA_3353	OTHER	0.015627	0.003911	0.000997	0.979465
MRA_2023	OTHER	0.062966	0.000622	0.005497	0.930915
MRA_3354	SP(Sec/SPI)	0.986791	0.008464	0.00453	0.000216	CS pos: 31-32. SAA-QT. Pr: 0.4825
MRA_2024	OTHER	0.019345	0.005835	0.007994	0.966826
MRA_3355	OTHER	0.00632	0.000474	0.000643	0.992562
MRA_2025	OTHER	0.005979	0.000997	0.000888	0.992137
MRA_3356	OTHER	0.006437	0.000243	0.000875	0.992446
MRA_2026	OTHER	0.005822	0.000859	0.001639	0.99168
MRA_3357	OTHER	0.145359	0.219721	0.005802	0.629118
MRA_2027	OTHER	0.006676	0.008386	0.002004	0.982934
MRA_3358	OTHER	0.21777	0.001532	0.033611	0.747088
MRA_2028	OTHER	0.018989	0.021639	0.005539	0.953833
MRA_3359	OTHER	0.003836	0.000378	0.00473	0.991056
MRA_2029	OTHER	0.011579	0.001633	0.00184	0.984949
MRA_3370	OTHER	0.008353	0.001367	0.001116	0.989164
MRA_3360	OTHER	0.108941	0.079715	0.020127	0.791216
MRA_2030	OTHER	0.026425	0.027037	0.003814	0.942724
MRA_3361	OTHER	0.015161	0.000443	0.000788	0.983607
MRA_2031	OTHER	0.029877	0.001525	0.001918	0.96668
MRA_3362	OTHER	0.039487	0.002599	0.004526	0.953388
MRA_2032	OTHER	0.003845	0.00117	0.001965	0.993019
MRA_3363	OTHER	0.022195	0.00679	0.008498	0.962518
MRA_2033	OTHER	0.010107	0.000913	0.00267	0.98631
MRA_3364	OTHER	0.014777	0.00632	0.001499	0.977404
MRA_2034	OTHER	0.019151	0.02156	0.003095	0.956194
MRA_3365	OTHER	0.010097	0.000372	0.007254	0.982277
MRA_2035	OTHER	0.004444	0.00245	0.00046	0.992646
MRA_3366	OTHER	0.029184	0.031937	0.003355	0.935524
MRA_2036	OTHER	0.028964	0.021316	0.002408	0.947312
MRA_3367	OTHER	0.014446	0.008318	0.004296	0.97294
MRA_2037	OTHER	0.007593	0.037128	0.001285	0.953995
MRA_3368	OTHER	0.012013	0.000985	0.003449	0.983554
MRA_2038	OTHER	0.011945	0.00157	0.003762	0.982722
MRA_3369	OTHER	0.005653	0.001123	0.001344	0.99188
MRA_2039	OTHER	0.002118	0.000221	0.000381	0.99728
MRA_3330	OTHER	0.061126	0.035494	0.228689	0.674692
MRA_2000	SP(Sec/SPI)	0.777837	0.200062	0.00465	0.01745	CS pos: 37-38. ASA-AT. Pr: 0.5153
MRA_3331	OTHER	0.0179	0.000773	0.001477	0.979849
MRA_2001	OTHER	0.016871	0.010595	0.005929	0.966606
MRA_3332	OTHER	0.010719	0.034335	0.002728	0.952218
MRA_2002	OTHER	0.012613	0.009386	0.002703	0.975299
MRA_3333	OTHER	0.21675	0.136026	0.033911	0.613313
MRA_2003	OTHER	0.010989	0.002869	0.002667	0.983476
MRA_3334	OTHER	0.08469	0.023776	0.032068	0.859465
MRA_2004	OTHER	0.012683	0.001957	0.002856	0.982504
MRA_3335	OTHER	0.011281	0.011066	0.005594	0.972059
MRA_2005	OTHER	0.023857	0.006274	0.005973	0.963896
MRA_3336	OTHER	0.007284	0.002488	0.00213	0.988098
MRA_2006	OTHER	0.11193	0.039096	0.003897	0.845078
MRA_3337	TAT(Tat/SPI)	0.309787	0.444808	0.010255	0.23515	CS pos: 36-37. AWA-AI. Pr: 0.3554
MRA_2007	OTHER	0.004311	0.001936	0.000601	0.993151
MRA_3338	OTHER	0.020592	0.004183	0.004705	0.970519
MRA_2008	OTHER	0.014616	0.002996	0.002351	0.980036
MRA_3339	LIPO(Sec/SPII)	0.004187	0.000246	0.994409	0.001159	CS pos: 18-19. LAG-CG. Pr: 0.9910
MRA_2009	OTHER	0.159107	0.26765	0.035578	0.537665
MRA_3340	OTHER	0.009241	0.000956	0.002405	0.987399
MRA_2010	OTHER	0.076808	0.014804	0.012166	0.896222
MRA_3341	OTHER	0.065414	0.167454	0.004476	0.762656
MRA_2011	LIPO(Sec/SPII)	0.014549	0.434726	0.527992	0.022732	CS pos: 42-43. LSA-CS. Pr: 0.5455
MRA_3342	OTHER	0.026251	0.006718	0.003382	0.963648
MRA_2012	OTHER	0.017859	0.00284	0.007286	0.972015
MRA_3343	OTHER	0.039915	0.004385	0.003968	0.951733
MRA_2013	OTHER	0.011154	0.001146	0.00228	0.985421
MRA_3344	OTHER	0.118347	0.009259	0.044281	0.828112
MRA_2014	OTHER	0.045221	0.018384	0.004401	0.931994
MRA_3345	OTHER	0.010209	0.001007	0.000732	0.988052
MRA_2015	TAT(Tat/SPI)	0.086801	0.501238	0.009547	0.402414	CS pos: 46-47. AYA-AG. Pr: 0.4330
MRA_3346	OTHER	0.010577	0.000792	0.000915	0.987716
MRA_2016	OTHER	0.026269	0.010333	0.004312	0.959085
MRA_3347	OTHER	0.017224	0.025889	0.00168	0.955207
MRA_2017	OTHER	0.007122	0.000451	0.000938	0.991489
MRA_3348	OTHER	0.059695	0.13576	0.008228	0.796317
MRA_2018	OTHER	0.126735	0.047753	0.017153	0.80836
MRA_3349	OTHER	0.018079	0.007271	0.032442	0.942208
MRA_2019	OTHER	0.069559	0.031822	0.022027	0.876592
MRA_1598A	OTHER	0.001026	0.030253	0.000155	0.968565
MRA_2070	OTHER	0.00388	0.002454	0.000673	0.992994
MRA_2071	OTHER	0.036518	0.066046	0.011527	0.885908
MRA_2072	OTHER	0.013585	0.020229	0.01045	0.955737
MRA_2062	OTHER	0.059962	0.004352	0.011921	0.923765
MRA_3393	OTHER	0.165753	0.028355	0.030097	0.775795
MRA_2063	OTHER	0.004826	0.003219	0.013763	0.978192
MRA_3394	SP(Sec/SPI)	0.679364	0.318888	0.00132	0.000428	CS pos: 32-33. AQA-NP. Pr: 0.9197
MRA_2064	OTHER	0.008711	0.001087	0.002492	0.987709
MRA_3395	OTHER	0.007527	0.004059	0.00384	0.984574
MRA_2065	OTHER	0.005231	0.000888	0.000898	0.992983
MRA_3396	OTHER	0.021561	0.010224	0.002497	0.965718
MRA_2066	OTHER	0.024285	0.003818	0.025322	0.946575
MRA_3397	OTHER	0.002925	0.001507	0.000457	0.995111
MRA_2067	OTHER	0.014902	0.0012	0.001249	0.982649
MRA_3398	OTHER	0.010102	0.001152	0.002978	0.985769
MRA_2068	OTHER	0.003479	0.002657	0.009234	0.98463
MRA_3399	OTHER	0.041767	0.004222	0.001302	0.952708
MRA_2069	OTHER	0.013915	0.000994	0.003753	0.981337
MRA_2080	OTHER	0.04666	0.005193	0.003558	0.944588
MRA_2081	OTHER	0.014779	0.000303	0.001337	0.983581
MRA_2082	LIPO(Sec/SPII)	0.021704	0.28071	0.696134	0.001452	CS pos: 23-24. VTG-CA. Pr: 0.6983
MRA_2083	OTHER	0.01172	0.00226	0.003365	0.982656
MRA_2073	OTHER	0.02294	0.021427	0.00358	0.952053
MRA_2074	OTHER	0.011234	0.01825	0.004479	0.966037
MRA_2075	OTHER	0.015177	0.000806	0.002866	0.981151
MRA_2076	OTHER	0.068447	0.072779	0.007819	0.850955
MRA_2077	OTHER	0.042671	0.057927	0.019288	0.880114
MRA_2078	OTHER	0.168304	0.117723	0.019504	0.694469
MRA_2079	OTHER	0.007723	0.001223	0.000812	0.990242
MRA_3380	OTHER	0.001222	8.2e-05	0.00015	0.998547
MRA_2050	OTHER	0.01311	0.002428	0.000954	0.983508
MRA_3381	OTHER	0.022677	0.004031	0.003128	0.970164
MRA_2040	OTHER	0.017775	0.000514	0.002195	0.979517
MRA_3371	OTHER	0.012994	0.007821	0.000821	0.978364
MRA_2041	OTHER	0.03765	0.00444	0.009797	0.948113
MRA_3372	SP(Sec/SPI)	0.82184	0.1332	0.041172	0.003788	CS pos: 28-29. AAG-EP. Pr: 0.3150
MRA_2042	OTHER	0.00306	0.000408	0.000189	0.996343
MRA_3373	OTHER	0.082685	0.03613	0.032436	0.848748
MRA_2043	OTHER	0.014277	0.001738	0.001024	0.982961
MRA_3374	OTHER	0.0773	0.015615	0.009795	0.89729
MRA_2044	OTHER	0.05364	0.001278	0.007234	0.937848
MRA_3375	SP(Sec/SPI)	0.890796	0.069171	0.010983	0.029051	CS pos: 32-33. AAA-DP. Pr: 0.8804
MRA_2045	OTHER	0.013588	0.009969	0.005057	0.971386
MRA_3376	OTHER	0.014666	0.003516	0.001486	0.980332
MRA_2046	OTHER	0.006018	0.002602	0.000883	0.990497
MRA_3377	OTHER	0.003226	0.000484	0.002375	0.993915
MRA_2047	OTHER	0.006816	0.000723	0.021469	0.970992
MRA_3378	OTHER	0.015265	0.013809	0.003186	0.967739
MRA_2048	OTHER	0.011834	0.000641	0.001273	0.986252
MRA_3379	OTHER	0.004702	0.008873	0.000823	0.985602
MRA_2049	OTHER	0.01215	0.018028	0.005828	0.963995
MRA_3390	SP(Sec/SPI)	0.450606	0.319682	0.035682	0.19403	CS pos: 40-41. AAA-AE. Pr: 0.1453
MRA_2060	OTHER	0.016592	0.042498	0.0043	0.93661
MRA_3391	OTHER	0.07496	0.007419	0.014731	0.90289
MRA_2061	LIPO(Sec/SPII)	0.002992	0.000164	0.996586	0.000257	CS pos: 15-16. IAG-CS. Pr: 0.9971
MRA_3392	OTHER	0.065392	0.014648	0.014354	0.905606
MRA_2051	OTHER	0.020486	0.004511	0.008813	0.96619
MRA_3382	OTHER	0.004474	0.000395	0.000435	0.994696
MRA_2052	OTHER	0.040708	0.020966	0.005345	0.932981
MRA_3383	OTHER	0.028353	0.338168	0.01927	0.614209
MRA_2053	OTHER	0.014152	0.00156	0.003138	0.981151
MRA_3384	OTHER	0.190053	0.095177	0.014573	0.700197
MRA_2054	OTHER	0.205692	0.101821	0.034113	0.658375
MRA_3385	SP(Sec/SPI)	0.43004	0.164843	0.035886	0.369231	CS pos: 31-32. ANA-AA. Pr: 0.0919
MRA_2055	OTHER	0.017369	0.008148	0.007098	0.967384
MRA_3386	OTHER	0.018915	0.04011	0.003078	0.937897
MRA_2056	TAT(Tat/SPI)	0.009384	0.850826	0.138748	0.001042	CS pos: 32-33. CAA-DD. Pr: 0.5384
MRA_3387	OTHER	0.36037	0.105474	0.045437	0.488718
MRA_2057	OTHER	0.025425	0.007249	0.004248	0.963078
MRA_3388	OTHER	0.024686	0.097865	0.1754	0.702049
MRA_2058	OTHER	0.093172	0.037473	0.005841	0.863513
MRA_3389	OTHER	0.006091	0.003693	0.002934	0.987282
MRA_2059	OTHER	0.089761	0.033106	0.015808	0.861325
MRA_0369	OTHER	0.044563	0.003551	0.003575	0.94831
MRA_0368	OTHER	0.047041	0.02343	0.043396	0.886134
MRA_1699	OTHER	0.006067	0.003799	0.001848	0.988286
MRA_0367	OTHER	0.008654	0.00023	0.005055	0.986061
MRA_1698	OTHER	0.056207	0.06967	0.009716	0.864406
MRA_0366	OTHER	0.058425	0.000608	0.00492	0.936047
MRA_1697	OTHER	0.026196	0.008979	0.003095	0.96173
MRA_0365	OTHER	0.003653	0.001955	0.00051	0.993882
MRA_1696	OTHER	0.00894	0.001167	0.010963	0.978931
MRA_0364	OTHER	0.170481	0.095057	0.006687	0.727776
MRA_1695	OTHER	0.025264	0.021136	0.00429	0.94931
MRA_0363	OTHER	0.11403	0.000536	0.093875	0.79156
MRA_1694	OTHER	0.017268	0.021642	0.003356	0.957733
MRA_0362	OTHER	0.012309	0.062981	0.00348	0.92123
MRA_1693	OTHER	0.011461	0.003014	0.004558	0.980967
MRA_0361	OTHER	0.007971	0.003134	0.002023	0.986872
MRA_1692	OTHER	0.056524	0.030425	0.014465	0.898586
MRA_0360	OTHER	0.013259	0.004709	0.002228	0.979803
MRA_1691	OTHER	0.014493	0.000324	0.001186	0.983998
MRA_1690	OTHER	0.029825	0.000856	0.002795	0.966524
MRA_3409	OTHER	0.019394	0.00241	0.004178	0.974017
MRA_0379	OTHER	0.015694	0.054645	0.001662	0.927999
MRA_0378	OTHER	0.00827	0.002579	0.000747	0.988404
MRA_0377	OTHER	0.071894	0.104205	0.028366	0.795534
MRA_0376	OTHER	0.009799	0.000852	0.001667	0.987681
MRA_0375	SP(Sec/SPI)	0.812595	0.024746	0.004704	0.157955	CS pos: 35-36. VNA-DE. Pr: 0.7754
MRA_0374	OTHER	0.028781	0.091684	0.009724	0.869811
MRA_0373	OTHER	0.009754	0.00058	0.001071	0.988595
MRA_0372	OTHER	0.050326	0.003423	0.007746	0.938506
MRA_0371	OTHER	0.003218	0.000276	0.000331	0.996176
MRA_0370	OTHER	0.021264	0.005078	0.005303	0.968355
MRA_1205A	OTHER	0.048063	0.014281	0.00623	0.931426
MRA_3400	OTHER	0.004726	0.001063	0.001111	0.9931
MRA_3401	OTHER	0.017701	0.001777	0.002173	0.978349
MRA_3402	OTHER	0.043919	0.021534	0.00891	0.925638
MRA_3403	OTHER	0.024315	0.009653	0.012033	0.953999
MRA_3404	OTHER	0.085096	0.014344	0.002257	0.898304
MRA_3405	OTHER	0.081409	0.02179	0.058932	0.837869
MRA_3406	OTHER	0.030907	0.002426	0.091366	0.875301
MRA_3407	OTHER	0.37982	0.199172	0.024212	0.396796
MRA_3408	OTHER	0.004922	0.00057	0.000606	0.993902
MRA_0349	OTHER	0.041112	0.004	0.004245	0.950643
MRA_0348	OTHER	0.041153	0.163651	0.002831	0.792365
MRA_1679	OTHER	0.010426	0.001172	0.001491	0.986911
MRA_0347	OTHER	0.064228	0.027287	0.011655	0.89683
MRA_1678	OTHER	0.007132	0.004525	0.000803	0.98754
MRA_0346	OTHER	0.011177	0.001872	0.001479	0.985472
MRA_1677	OTHER	0.045021	0.008832	0.002683	0.943464
MRA_0345	OTHER	0.013949	0.009192	0.003227	0.973633
MRA_1676	OTHER	0.009729	0.001503	0.000901	0.987866
MRA_0344	TAT(Tat/SPI)	0.210889	0.401527	0.048704	0.338881	CS pos: 31-32. VLA-RP. Pr: 0.2402
MRA_1675	OTHER	0.024156	0.002166	0.17062	0.803059
MRA_0343	OTHER	0.024503	0.000356	0.007707	0.967435
MRA_1674	OTHER	0.011315	0.001004	0.000997	0.986684
MRA_0342	OTHER	0.039211	0.001586	0.00292	0.956282
MRA_1673	OTHER	0.013779	0.004043	0.019716	0.962462
MRA_0341	OTHER	0.014434	0.002277	0.001997	0.981291
MRA_1672	OTHER	0.01445	0.018349	0.026278	0.940924
MRA_0340	OTHER	0.032383	0.00413	0.038441	0.925047
MRA_1671	OTHER	0.007383	0.000716	0.00096	0.990942
MRA_1670	OTHER	0.005901	0.000808	0.001624	0.991667
MRA_0359	OTHER	0.035508	0.004411	0.005282	0.954799
MRA_0358	OTHER	0.003079	0.000552	0.00088	0.99549
MRA_1689	OTHER	0.005365	0.0038	0.004873	0.985962
MRA_0357	OTHER	0.008265	0.001243	0.002599	0.987894
MRA_1688	LIPO(Sec/SPII)	0.00343	0.000455	0.995688	0.000427	CS pos: 19-20. VTA-CG. Pr: 0.9966
MRA_0356	OTHER	0.103025	0.098277	0.020841	0.777856
MRA_1687	OTHER	0.010876	0.011131	0.003632	0.974361
MRA_0355	OTHER	0.024603	0.070296	0.02	0.885101
MRA_1686	OTHER	0.021478	0.015105	0.003228	0.960189
MRA_0354	OTHER	0.095843	0.003054	0.084337	0.816766
MRA_1685	OTHER	0.095473	0.02591	0.050284	0.828332
MRA_0353	LIPO(Sec/SPII)	0.001265	0.000216	0.998362	0.000158	CS pos: 22-23. VAG-CN. Pr: 0.9982
MRA_1684	OTHER	0.008117	0.008455	0.002194	0.981234
MRA_0352	OTHER	0.020508	0.005828	0.003348	0.970316
MRA_1683	OTHER	0.013458	0.000448	0.00149	0.984604
MRA_0351	OTHER	0.003919	0.000508	0.001689	0.993884
MRA_1682	OTHER	0.116416	0.003903	0.00599	0.873691
MRA_0350	OTHER	0.071847	0.088566	0.006961	0.832626
MRA_1681	OTHER	0.108764	0.03262	0.04344	0.815176
MRA_1680	OTHER	0.058483	0.00225	0.010123	0.929144
MRA_3430	OTHER	0.005053	0.00065	0.001416	0.992881
MRA_2100	OTHER	0.0048	0.020213	0.00107	0.973918
MRA_3431	OTHER	0.002613	0.00037	0.000565	0.996452
MRA_2101	OTHER	0.019443	0.008854	0.004115	0.967588
MRA_3432	OTHER	0.012913	0.003208	0.001412	0.982467
MRA_2102	OTHER	0.044195	0.004983	0.008202	0.94262
MRA_3433	TAT(Tat/SPI)	0.159621	0.591188	0.073788	0.175403	CS pos: 37-38. TLA-NR. Pr: 0.1358
MRA_2103	OTHER	0.013128	0.055755	0.004283	0.926834
MRA_3434	OTHER	0.022193	0.120246	0.004056	0.853506
MRA_2104	OTHER	0.072781	0.301662	0.023553	0.602004
MRA_3435	SP(Sec/SPI)	0.737379	0.056665	0.181456	0.0245	CS pos: 30-31. ATG-GG. Pr: 0.2387
MRA_2105	OTHER	0.072141	0.070904	0.019673	0.837281
MRA_3436	OTHER	0.005438	0.001228	0.00139	0.991945
MRA_2106	OTHER	0.135242	0.025672	0.029442	0.809644
MRA_3437	OTHER	0.005992	0.001815	0.001095	0.991097
MRA_2107	OTHER	0.102317	0.037431	0.004845	0.855407
MRA_3438	OTHER	0.023686	0.015136	0.002907	0.958271
MRA_2108	OTHER	0.002678	0.000304	0.001622	0.995396
MRA_3439	OTHER	0.031513	0.007109	0.016667	0.94471
MRA_2109	SP(Sec/SPI)	0.419649	0.009545	0.250486	0.32032	CS pos: 31-32. ARS-LG. Pr: 0.1776
MRA_2798A	OTHER	0.083777	0.002553	0.020005	0.893664
MRA_3440	OTHER	0.002798	0.000294	0.000658	0.99625
MRA_2110	OTHER	0.136779	0.039714	0.002177	0.82133
MRA_3441	OTHER	0.011063	0.002987	0.001334	0.984615
MRA_2111	OTHER	0.133987	0.020616	0.014215	0.831183
MRA_3442	OTHER	0.104784	0.017362	0.008557	0.869298
MRA_2112	OTHER	0.011315	0.002723	0.005826	0.980136
MRA_3443	OTHER	0.109637	0.04772	0.276337	0.566305
MRA_2113	OTHER	0.145917	0.011656	0.010837	0.83159
MRA_3444	OTHER	0.023675	0.001464	0.004995	0.969866
MRA_2114	OTHER	0.18846	0.051164	0.024785	0.735591
MRA_3445	OTHER	0.016539	0.018592	0.004258	0.960611
MRA_2115	OTHER	0.01482	0.01264	0.003426	0.969113
MRA_3446	OTHER	0.003006	0.00019	0.000447	0.996357
MRA_2116	OTHER	0.042266	0.025223	0.004109	0.928402
MRA_3447	OTHER	0.006755	0.001373	0.001483	0.990389
MRA_2117	OTHER	0.006966	0.000748	0.001549	0.990737
MRA_3448	OTHER	0.010135	0.002888	0.001254	0.985723
MRA_2118	OTHER	0.015382	0.008649	0.00333	0.972638
MRA_3449	OTHER	0.009205	0.001943	0.002509	0.986342
MRA_2119	OTHER	0.017266	0.022252	0.003391	0.957091
MRA_0389	LIPO(Sec/SPII)	0.001672	0.000315	0.9976	0.000413	CS pos: 20-21. LTG-CS. Pr: 0.9967
MRA_0388	OTHER	0.033022	0.002227	0.012992	0.951759
MRA_0387	OTHER	0.025555	0.00257	0.003365	0.968511
MRA_0386	OTHER	0.04431	0.041844	0.003153	0.910693
MRA_0385	OTHER	0.122775	0.025352	0.034795	0.817077
MRA_0384	OTHER	0.008822	0.002548	0.00143	0.9872
MRA_0383	OTHER	0.124665	0.000907	0.003808	0.870619
MRA_0382	OTHER	0.007443	0.004489	0.001582	0.986485
MRA_0381	OTHER	0.050004	0.022611	0.0054	0.921985
MRA_0380	OTHER	0.044847	0.022046	0.006489	0.926618
MRA_3410	OTHER	0.014291	0.010916	0.001875	0.972919
MRA_3411	OTHER	0.036232	0.02368	0.007225	0.932862
MRA_3412	OTHER	0.012457	0.027266	0.001143	0.959134
MRA_3413	OTHER	0.009571	0.004321	0.001397	0.984711
MRA_3414	OTHER	0.026326	0.015571	0.006955	0.951148
MRA_3415	OTHER	0.004305	0.002601	0.000676	0.992417
MRA_3416	OTHER	0.003313	0.000469	0.000381	0.995837
MRA_3417	OTHER	0.065449	0.020607	0.01182	0.902124
MRA_3418	OTHER	0.005388	0.000709	0.006995	0.986908
MRA_3419	OTHER	0.072839	0.001265	0.004411	0.921485
MRA_0399	OTHER	0.035505	0.055559	0.004808	0.904129
MRA_0398	OTHER	0.015536	0.011432	0.00252	0.970512
MRA_0397	OTHER	0.006	0.000245	0.000923	0.992832
MRA_0396	OTHER	0.019944	0.035401	0.001896	0.94276
MRA_0395	OTHER	0.053643	0.034582	0.003637	0.908139
MRA_0394	OTHER	0.06119	0.001427	0.010977	0.926405
MRA_0393	OTHER	0.001988	0.002285	0.000341	0.995385
MRA_0392	OTHER	0.086645	0.045419	0.037212	0.830724
MRA_0391	OTHER	0.1355	0.067551	0.036149	0.760799
MRA_0390	OTHER	0.006694	0.005646	0.002305	0.985356
MRA_3420	OTHER	0.012013	0.000985	0.003449	0.983554
MRA_3428A	OTHER	0.055175	0.062638	0.001313	0.880874
MRA_3421	OTHER	0.014446	0.008318	0.004296	0.97294
MRA_3422	OTHER	0.01188	0.002595	0.003851	0.981674
MRA_3423	OTHER	0.054981	0.037173	0.006018	0.901828
MRA_3424	OTHER	0.003315	0.005304	0.000545	0.990836
MRA_3425	OTHER	0.033972	0.009264	0.004652	0.952112
MRA_3426	OTHER	0.003044	0.000194	0.000498	0.996264
MRA_3427	OTHER	0.010746	0.003048	0.003009	0.983198
MRA_3428	TAT(Tat/SPI)	0.313113	0.437501	0.016825	0.232561	CS pos: 44-45. AGA-DE. Pr: 0.2117
MRA_3429	LIPO(Sec/SPII)	0.001362	0.000572	0.997816	0.00025	CS pos: 25-26. LGA-CG. Pr: 0.9973
MRA_1615	OTHER	0.014106	0.000806	0.006071	0.979018
MRA_2947	OTHER	0.037462	0.003743	0.006225	0.95257
MRA_1614	OTHER	0.032101	0.011296	0.003705	0.952898
MRA_2948	OTHER	0.033126	0.012099	0.004082	0.950693
MRA_1613	OTHER	0.034289	0.003071	0.004749	0.957891
MRA_2949	OTHER	0.022795	0.015779	0.007408	0.954017
MRA_1612	OTHER	0.030907	0.001476	0.001944	0.965672
MRA_1611	OTHER	0.007282	0.004811	0.000903	0.987004
MRA_1610	OTHER	0.010755	0.004433	0.003435	0.981377
MRA_2940	OTHER	0.02693	0.000719	0.000829	0.971522
MRA_2941	OTHER	0.003698	0.001703	0.001392	0.993207
MRA_2942	OTHER	0.019404	0.014253	0.005455	0.960888
MRA_1619	OTHER	0.010724	0.007537	0.002144	0.979595
MRA_2943	OTHER	0.005927	0.000605	0.000445	0.993023
MRA_1618	OTHER	0.039703	0.005592	0.021376	0.93333
MRA_2944	OTHER	0.01441	0.000581	0.001112	0.983897
MRA_1617	OTHER	0.1082	0.002559	0.021332	0.86791
MRA_2945	OTHER	0.001803	0.000131	0.01145	0.986617
MRA_1616	OTHER	0.007544	0.000913	0.001259	0.990284
MRA_2946	OTHER	0.051681	0.029118	0.042329	0.876873
MRA_1626	TAT(Tat/SPI)	0.334797	0.335529	0.03062	0.299054	CS pos: 36-37. SNS-LY. Pr: 0.3590
MRA_2958	OTHER	0.041478	0.014366	0.013845	0.930311
MRA_1625	OTHER	0.117159	0.047604	0.020879	0.814358
MRA_2959	OTHER	0.009712	0.002892	0.002726	0.98467
MRA_1624	OTHER	0.034853	0.004263	0.010164	0.95072
MRA_1623	OTHER	0.059867	0.015862	0.011923	0.912348
MRA_1622	OTHER	0.009684	0.000935	0.001425	0.987957
MRA_1621	OTHER	0.022427	0.035006	0.003292	0.939275
MRA_1620	OTHER	0.065119	0.013761	0.032372	0.888748
MRA_2950	OTHER	0.016118	0.036253	0.005782	0.941846
MRA_2951	SP(Sec/SPI)	0.539023	0.057297	0.057042	0.346638	CS pos: 28-29. PLA-GD. Pr: 0.1649
MRA_2952	OTHER	0.025808	0.005022	0.001011	0.968159
MRA_2953	OTHER	0.00922	0.006099	0.002273	0.982409
MRA_2954	OTHER	0.005441	0.000934	0.022001	0.971624
MRA_1629	OTHER	0.033547	0.001771	0.043976	0.920707
MRA_2955	OTHER	0.017753	0.003513	0.004787	0.973947
MRA_1628	OTHER	0.004772	0.028627	0.001253	0.965348
MRA_2956	OTHER	0.01012	0.00101	0.001189	0.987681
MRA_1627	OTHER	0.016847	0.004949	0.002062	0.976141
MRA_2957	OTHER	0.009636	0.000508	0.067981	0.921875
MRA_2925	OTHER	0.007701	0.020536	0.0018	0.969964
MRA_2926	OTHER	0.002871	0.000948	0.000318	0.995863
MRA_2927	OTHER	0.045932	0.015265	0.004177	0.934626
MRA_2928	OTHER	0.019242	0.021045	0.002545	0.957168
MRA_2929	OTHER	0.003792	0.001421	0.000562	0.994225
MRA_2920	OTHER	0.006316	0.000538	0.003606	0.989539
MRA_2921	OTHER	0.046729	0.01633	0.021882	0.915059
MRA_2922	OTHER	0.018025	0.003327	0.001628	0.97702
MRA_2923	OTHER	0.018277	0.003059	0.004364	0.9743
MRA_2924	OTHER	0.004316	0.000799	0.000765	0.99412
MRA_1604	OTHER	0.004033	0.000822	0.000571	0.994574
MRA_2936	SP(Sec/SPI)	0.993724	0.001116	0.004881	0.000279	CS pos: 25-26. AWA-DA. Pr: 0.7800
MRA_1603	OTHER	0.018973	0.011399	0.007806	0.961822
MRA_2937	OTHER	0.014093	0.022144	0.000969	0.962793
MRA_1602	OTHER	0.008452	0.000742	0.001947	0.988859
MRA_2938	OTHER	0.018331	0.019098	0.001114	0.961457
MRA_1601	OTHER	0.065562	0.092701	0.024247	0.817491
MRA_2939	OTHER	0.04218	0.03198	0.375716	0.550124
MRA_1600	OTHER	0.078249	0.053777	0.010366	0.857608
MRA_2930	LIPO(Sec/SPII)	0.009595	0.000357	0.989711	0.000337	CS pos: 22-23. VAG-CE. Pr: 0.9904
MRA_1609	OTHER	0.023073	0.011184	0.002588	0.963156
MRA_2931	OTHER	0.021421	0.001374	0.003934	0.973271
MRA_1608	OTHER	0.005415	0.001185	0.001359	0.992041
MRA_2932	OTHER	0.008594	0.001183	0.001119	0.989103
MRA_1607	OTHER	0.027985	0.015899	0.004651	0.951466
MRA_2933	OTHER	0.007631	0.000713	0.000568	0.991088
MRA_1606	OTHER	0.018939	0.007671	0.003235	0.970155
MRA_2934	OTHER	0.012383	0.00051	0.001589	0.985518
MRA_1605	OTHER	0.229926	0.216324	0.050498	0.503253
MRA_2935	OTHER	0.00379	0.000584	0.00051	0.995116
MRA_0328	OTHER	0.043114	0.001504	0.002042	0.95334
MRA_1659	SP(Sec/SPI)	0.88397	0.042269	0.004975	0.068786	CS pos: 38-39. VHA-QV. Pr: 0.8963
MRA_0327	OTHER	0.107686	0.141427	0.006369	0.744518
MRA_1658	OTHER	0.009666	0.011385	0.001966	0.976983
MRA_0326	OTHER	0.010261	0.002987	0.001247	0.985506
MRA_1657	OTHER	0.126973	0.100808	0.016288	0.755931
MRA_0325	OTHER	0.004083	0.003013	0.000967	0.991937
MRA_1656	OTHER	0.006905	0.000755	0.000755	0.991584
MRA_0324	TAT(Tat/SPI)	0.006412	0.991546	0.001833	0.000209	CS pos: 31-32. AWA-DP. Pr: 0.7869
MRA_1655	OTHER	0.01094	0.007408	0.00242	0.979232
MRA_0323	OTHER	0.069546	0.023423	0.020363	0.886668
MRA_1654	OTHER	0.013026	0.033936	0.004877	0.948161
MRA_0322	OTHER	0.014847	0.314305	0.002124	0.668723
MRA_1653	OTHER	0.028163	0.028539	0.007664	0.935634
MRA_0321	OTHER	0.045833	0.021175	0.059041	0.873952
MRA_1652	OTHER	0.014063	0.001473	0.002885	0.981579
MRA_0320	OTHER	0.085246	0.013467	0.005562	0.895725
MRA_1651	OTHER	0.026962	0.019831	0.012993	0.940213
MRA_1650	OTHER	0.004873	0.001343	0.002706	0.991079
MRA_2980	OTHER	0.010591	0.124434	0.003076	0.861899
MRA_2981	OTHER	0.005992	0.002624	0.001004	0.990381
MRA_2982	OTHER	0.010145	0.008344	0.049935	0.931576
MRA_2983	OTHER	0.007853	0.003194	0.001589	0.987364
MRA_2984	SP(Sec/SPI)	0.530694	0.04243	0.079112	0.347764	CS pos: 36-37. VAA-VL. Pr: 0.2735
MRA_2985	OTHER	0.019675	0.317515	0.002315	0.660496
[truncated: 2,037 more rows]

## Sheet: Mra-SecretomeP
SecretomeP 2.0 Prediction for M. tuberculosis H37Ra Secreted Proteins
Name\t	NN-score	Odds	Weighted
MRA_3394	0.976	7.351	0.015
MRA_1427	0.976	7.351	0.015
MRA_3330	0.974	7.351	0.015
MRA_3777	0.973	7.316	0.015
MRA_0318	0.972	7.33	0.015
MRA_1681	0.971	7.351	0.015
MRA_2900	0.97	7.204	0.014
MRA_0872	0.97	7.351	0.015
MRA_1825	0.969	7.351	0.015
MRA_2061	0.967	7.254	0.015
MRA_3122	0.966	7.307	0.015
MRA_1773	0.966	7.316	0.015
MRA_1629	0.965	7.293	0.015
MRA_2350	0.963	7.275	0.015
MRA_2095	0.962	7.311	0.015
MRA_0989	0.962	1.796	0.004
MRA_1852	0.961	7.278	0.015
MRA_3046	0.96	7.351	0.015
MRA_3279	0.959	7.267	0.015
MRA_1088	0.959	7.156	0.014
MRA_0404	0.959	7.286	0.015
MRA_3068	0.958	7.133	0.014
MRA_0208	0.958	7.011	0.014
MRA_0846	0.957	7.279	0.015
MRA_1986	0.955	7.184	0.014
MRA_0784	0.955	7.095	0.014
MRA_3129	0.953	6.827	0.014
MRA_2323	0.953	6.901	0.014
MRA_2427	0.952	7.098	0.014
MRA_1694A	0.952	7.011	0.014
MRA_0566	0.952	7.223	0.014
MRA_0132	0.951	6.966	0.014
MRA_0329	0.95	7.092	0.014
MRA_3169	0.949	6.979	0.014
MRA_2626	0.948	7.117	0.014
MRA_2897	0.945	6.805	0.014
MRA_2216	0.945	6.869	0.014
MRA_0630	0.945	6.659	0.013
MRA_2255	0.944	6.97	0.014
MRA_1260	0.944	7.076	0.014
MRA_1298A	0.943	6.813	0.014
MRA_2745	0.942	6.833	0.014
MRA_2413	0.941	6.857	0.014
MRA_1156	0.941	6.938	0.014
MRA_1030	0.941	7.02	0.014
MRA_3780	0.94	6.832	0.014
MRA_2460	0.94	6.724	0.013
MRA_1488	0.94	6.813	0.014
MRA_1276	0.94	6.587	0.013
MRA_1805	0.939	6.92	0.014
MRA_1413	0.939	6.805	0.014
MRA_0590	0.939	6.619	0.013
MRA_3042	0.938	6.688	0.013
MRA_1299	0.938	6.836	0.014
MRA_0837	0.938	6.684	0.013
MRA_0484	0.938	6.688	0.013
MRA_3611	0.937	7.014	0.014
MRA_1802	0.937	6.959	0.014
MRA_0403	0.937	6.659	0.013
MRA_2384	0.936	6.888	0.014
MRA_1378	0.936	6.746	0.013
MRA_0882	0.936	6.72	0.013
MRA_0249	0.936	6.928	0.014
MRA_2665	0.935	6.755	0.014
MRA_1012	0.935	6.718	0.013
MRA_0843	0.935	6.511	0.013
MRA_0626	0.935	6.593	0.013
MRA_0265A	0.935	6.96	0.014
MRA_3012	0.934	6.639	0.013
MRA_2458A	0.934	6.617	0.013
MRA_2041	0.933	6.709	0.013
MRA_1114	0.933	6.513	0.013
MRA_0375	0.933	6.732	0.013
MRA_3921	0.932	6.683	0.013
MRA_1956	0.932	6.896	0.014
MRA_1938	0.932	6.663	0.013
MRA_1079	0.932	6.555	0.013
MRA_3776	0.931	6.398	0.013
MRA_3623	0.931	6.486	0.013
MRA_2306	0.931	6.643	0.013
MRA_3844	0.93	6.424	0.013
MRA_0752	0.93	6.691	0.013
MRA_1985	0.929	6.482	0.013
MRA_2765	0.928	6.684	0.013
MRA_0422	0.928	6.326	0.013
MRA_3703	0.927	6.407	0.013
MRA_3429	0.927	6.383	0.013
MRA_1657	0.927	6.46	0.013
MRA_0711	0.927	6.524	0.013
MRA_3339	0.926	6.614	0.013
MRA_3140	0.926	6.643	0.013
MRA_2808	0.926	6.399	0.013
MRA_2399	0.926	6.364	0.013
MRA_1626	0.926	6.429	0.013
MRA_3384	0.925	6.532	0.013
MRA_2728	0.925	6.328	0.013
MRA_2293	0.925	6.389	0.013
MRA_2192	0.925	6.545	0.013
MRA_1722	0.925	6.393	0.013
MRA_0937	0.925	6.546	0.013
MRA_1915	0.924	6.437	0.013
MRA_1688	0.923	6.351	0.013
MRA_0121	0.923	6.554	0.013
MRA_2309	0.922	6.423	0.013
MRA_1312	0.922	6.486	0.013
MRA_0353	0.922	6.489	0.013
MRA_3675	0.921	6.468	0.013
MRA_3466	0.921	6.474	0.013
MRA_1837	0.921	6.186	0.012
MRA_1497	0.921	6.317	0.013
MRA_0525	0.921	6.45	0.013
MRA_3529	0.92	6.361	0.013
MRA_1763	0.92	6.426	0.013
MRA_0681	0.92	6.282	0.013
MRA_0335	0.92	6.45	0.013
MRA_2289	0.919	6.348	0.013
MRA_1098	0.919	6.353	0.013
MRA_0211	0.919	6.345	0.013
MRA_3788	0.918	6.351	0.013
MRA_3532	0.918	6.291	0.013
MRA_2305A	0.918	6.366	0.013
MRA_1700	0.918	6.046	0.012
MRA_0356	0.918	6.074	0.012
MRA_3783	0.917	6.319	0.013
MRA_2385	0.917	6.291	0.013
MRA_0478	0.917	6.272	0.013
MRA_0232	0.916	6.221	0.012
MRA_2949	0.915	6.274	0.013
MRA_1283	0.915	6.199	0.012
MRA_0508	0.915	6.229	0.012
MRA_3722	0.914	6.222	0.012
MRA_2867	0.914	6.208	0.012
MRA_3522	0.913	6.004	0.012
MRA_2928	0.913	5.899	0.012
MRA_2576	0.913	6.064	0.012
MRA_1428	0.913	6.006	0.012
MRA_0514	0.913	5.963	0.012
MRA_3196	0.912	6.157	0.012
MRA_0877	0.912	6.032	0.012
MRA_3351	0.911	5.962	0.012
MRA_1892	0.911	6.145	0.012
MRA_1709	0.911	6.117	0.012
MRA_0798	0.911	6.096	0.012
MRA_2444	0.91	6.088	0.012
MRA_3649A	0.909	6.05	0.012
MRA_2307	0.909	6.09	0.012
MRA_0635	0.909	5.915	0.012
MRA_3809	0.908	6.034	0.012
MRA_3105	0.908	5.876	0.012
MRA_3312	0.907	5.966	0.012
MRA_0954	0.907	5.981	0.012
MRA_0380	0.907	6.06	0.012
MRA_0187	0.907	5.844	0.012
MRA_2026	0.906	5.959	0.012
MRA_1963	0.906	5.924	0.012
MRA_1111	0.905	5.66	0.011
MRA_3932	0.904	3.898	0.008
MRA_3741	0.904	5.853	0.012
MRA_1495A	0.904	5.888	0.012
MRA_1225	0.904	5.825	0.012
MRA_0975	0.904	5.802	0.012
MRA_0742	0.904	5.745	0.011
MRA_0453	0.904	5.998	0.012
MRA_0304	0.904	5.897	0.012
MRA_3320	0.903	5.834	0.012
MRA_1902	0.903	5.783	0.012
MRA_0129	0.903	5.84	0.012
MRA_0102	0.902	5.807	0.012
MRA_3754	0.901	5.756	0.012
MRA_3667	0.901	5.921	0.012
MRA_3142	0.901	5.79	0.012
MRA_3047	0.901	5.8	0.012
MRA_3732	0.9	5.728	0.011
MRA_2979	0.9	5.832	0.012
MRA_2410	0.9	5.796	0.012
MRA_1929	0.9	5.857	0.012
MRA_1813	0.9	5.731	0.011
MRA_0987	0.9	2.179	0.004
MRA_0553	0.9	5.725	0.011
MRA_3659	0.899	5.731	0.011
MRA_1668	0.899	5.75	0.011
MRA_1590	0.899	5.744	0.011
MRA_1006	0.899	5.854	0.012
MRA_3959	0.898	5.545	0.011
MRA_3870	0.898	5.669	0.011
MRA_2756A	0.898	5.705	0.011
MRA_2273	0.898	5.673	0.011
MRA_1937	0.898	5.684	0.011
MRA_1612	0.898	5.681	0.011
MRA_0951	0.898	5.672	0.011
MRA_0323	0.898	5.655	0.011
MRA_2883	0.897	5.659	0.011
MRA_2524	0.897	5.633	0.011
MRA_1988	0.897	5.685	0.011
MRA_1853	0.897	5.634	0.011
MRA_1567	0.897	5.692	0.011
MRA_1322	0.897	5.712	0.011
MRA_0171	0.897	5.683	0.011
MRA_2696	0.896	5.681	0.011
MRA_2446	0.896	5.653	0.011
MRA_1269	0.896	5.594	0.011
MRA_1071	0.896	5.663	0.011
MRA_1060	0.896	5.594	0.011
MRA_3660	0.895	5.583	0.011
MRA_3462	0.895	5.539	0.011
MRA_3341	0.895	5.593	0.011
MRA_3255	0.895	5.576	0.011
MRA_2972	0.895	5.639	0.011
MRA_2585	0.895	5.604	0.011
MRA_2368	0.895	5.483	0.011
MRA_1242	0.895	5.649	0.011
MRA_0616	0.895	5.606	0.011
MRA_0486	0.895	5.527	0.011
MRA_3797	0.894	5.659	0.011
MRA_2414	0.894	5.665	0.011
MRA_1040	0.894	5.578	0.011
MRA_3805	0.893	5.537	0.011
MRA_3630	0.893	5.532	0.011
MRA_2755	0.893	5.607	0.011
MRA_2686	0.893	5.521	0.011
MRA_2002	0.893	5.463	0.011
MRA_1573	0.893	5.539	0.011
MRA_1237	0.893	5.537	0.011
MRA_0949A	0.893	5.575	0.011
MRA_0678	0.893	5.496	0.011
MRA_3212	0.892	5.476	0.011
MRA_2737	0.892	5.678	0.011
MRA_1896	0.892	5.457	0.011
MRA_1842A	0.892	5.572	0.011
MRA_1011	0.892	5.47	0.011
MRA_2602	0.891	5.659	0.011
MRA_2448	0.891	5.613	0.011
MRA_1993	0.891	5.561	0.011
MRA_3790	0.89	5.353	0.011
MRA_2930	0.89	5.414	0.011
MRA_2318	0.89	5.549	0.011
MRA_2264	0.89	5.451	0.011
MRA_1842	0.89	5.366	0.011
MRA_1557	0.89	5.558	0.011
MRA_3526	0.889	5.425	0.011
MRA_3128	0.889	5.488	0.011
MRA_2382	0.889	5.483	0.011
MRA_1909A	0.889	5.21	0.01
MRA_0158	0.889	5.333	0.011
MRA_3484	0.888	5.339	0.011
MRA_3205	0.888	5.351	0.011
MRA_2667	0.888	5.401	0.011
MRA_1282	0.888	5.367	0.011
MRA_3664	0.886	5.343	0.011
MRA_1903	0.886	5.362	0.011
MRA_1868	0.886	5.337	0.011
MRA_1540	0.886	5.334	0.011
MRA_1194	0.886	5.323	0.011
MRA_0743	0.886	5.329	0.011
MRA_0168	0.886	5.282	0.011
MRA_3705	0.885	5.402	0.011
MRA_3237	0.885	5.173	0.01
MRA_0724	0.885	5.205	0.01
MRA_0687	0.885	5.181	0.01
MRA_1897	0.884	5.164	0.01
MRA_1611	0.884	5.204	0.01
MRA_1451	0.884	5.155	0.01
MRA_0504	0.884	5.429	0.011
MRA_2906	0.883	5.226	0.01
MRA_2434	0.883	5.378	0.011
MRA_1968	0.883	5.274	0.011
MRA_1817	0.883	5.301	0.011
MRA_1680	0.883	5.189	0.01
MRA_0955	0.883	5.171	0.01
MRA_0354	0.883	5.196	0.01
MRA_3596	0.882	5.182	0.01
MRA_3465	0.882	5.136	0.01
MRA_3036	0.882	5.057	0.01
MRA_1360	0.882	5.228	0.01
MRA_1039	0.882	5.134	0.01
MRA_0838	0.882	5.206	0.01
MRA_0460	0.882	5.2	0.01
MRA_3593	0.881	5.152	0.01
MRA_3057	0.881	5.306	0.011
MRA_2846	0.881	5.135	0.01
MRA_1906	0.881	5.223	0.01
MRA_0631	0.881	5.469	0.011
MRA_2477	0.88	5.173	0.01
MRA_1566	0.88	5.118	0.01
MRA_1059	0.88	5.083	0.01
MRA_3782	0.879	5.025	0.01
MRA_2546	0.879	5.142	0.01
MRA_2440	0.879	5.163	0.01
MRA_0649	0.879	5.289	0.011
MRA_3961	0.878	5.316	0.011
MRA_3842	0.878	5.106	0.01
MRA_3691	0.878	5.206	0.01
MRA_2785	0.878	5.133	0.01
MRA_2258	0.878	5.15	0.01
MRA_2253	0.878	5.136	0.01
MRA_1751	0.878	5.025	0.01
MRA_3452	0.877	5.345	0.011
MRA_3288	0.877	5.122	0.01
MRA_2987	0.877	4.967	0.01
MRA_2944	0.877	5.059	0.01
MRA_2907	0.877	4.997	0.01
MRA_2520	0.877	5.098	0.01
MRA_2010	0.877	5.106	0.01
MRA_0515A	0.877	5.043	0.01
MRA_0437	0.877	5.165	0.01
MRA_0051	0.877	5.159	0.01
MRA_2904	0.876	4.998	0.01
MRA_2383	0.876	5.095	0.01
MRA_2252	0.876	5.033	0.01
MRA_1910	0.876	5.034	0.01
MRA_0948	0.876	5.213	0.01
MRA_0469	0.876	5.032	0.01
MRA_0309	0.876	5.029	0.01
MRA_2645	0.875	5.048	0.01
MRA_1858	0.875	4.898	0.01
MRA_2863	0.874	4.981	0.01
MRA_2077	0.874	4.933	0.01
MRA_2009	0.874	4.976	0.01
MRA_1886	0.874	5.054	0.01
MRA_1291	0.874	4.869	0.01
MRA_0692	0.874	5.034	0.01
MRA_3226	0.873	5.115	0.01
MRA_3206	0.873	5.073	0.01
MRA_1313	0.873	4.994	0.01
MRA_2625	0.872	5.236	0.01
MRA_1656	0.872	5.032	0.01
MRA_0884	0.872	5.194	0.01
MRA_0326	0.872	4.815	0.01
MRA_3286	0.871	1.407	0.003
MRA_3245	0.871	5.035	0.01
MRA_0985	0.871	1.542	0.003
MRA_0942	0.871	4.921	0.01
MRA_0338	0.871	4.953	0.01
MRA_3911	0.87	5.03	0.01
MRA_1594	0.87	4.787	0.01
MRA_0673A	0.87	5.041	0.01
MRA_2057	0.869	4.751	0.01
MRA_1439	0.869	4.912	0.01
MRA_1200	0.869	5.024	0.01
MRA_0814	0.869	5.056	0.01
MRA_0386A	0.869	4.989	0.01
MRA_3936	0.868	2.227	0.004
MRA_3807	0.868	4.731	0.009
MRA_3100	0.868	4.986	0.01
MRA_2850	0.868	4.816	0.01
MRA_2553	0.868	4.947	0.01
MRA_2347	0.868	5.089	0.01
MRA_2324	0.868	4.834	0.01
MRA_1255	0.868	4.699	0.009
MRA_3889	0.867	4.755	0.01
MRA_3622	0.867	4.868	0.01
MRA_3027	0.867	4.859	0.01
MRA_2211	0.867	4.744	0.009
MRA_2066	0.867	4.953	0.01
MRA_3893	0.866	4.928	0.01
MRA_3325	0.866	4.962	0.01
MRA_0610	0.866	4.904	0.01
MRA_3395	0.865	4.626	0.009
MRA_2791	0.865	4.908	0.01
MRA_1157	0.865	4.769	0.01
MRA_1124	0.865	4.736	0.009
MRA_0417	0.865	4.823	0.01
MRA_0270	0.865	4.724	0.009
MRA_0698	0.864	4.821	0.01
MRA_0183	0.864	4.836	0.01
MRA_0030	0.864	4.827	0.01
MRA_3656	0.863	4.84	0.01
MRA_3637	0.863	4.617	0.009
MRA_3216	0.863	4.872	0.01
MRA_1755	0.863	4.714	0.009
MRA_3633	0.862	4.769	0.01
MRA_3284	0.862	4.804	0.01
MRA_2398	0.862	4.702	0.009
MRA_1885	0.862	4.826	0.01
MRA_1126	0.862	4.816	0.01
MRA_0248	0.862	4.543	0.009
MRA_3124	0.861	4.97	0.01
MRA_2509	0.861	4.556	0.009
MRA_1388	0.861	4.559	0.009
MRA_3152	0.86	4.738	0.009
MRA_1406	0.86	4.641	0.009
MRA_1044	0.86	4.631	0.009
MRA_0497	0.86	4.524	0.009
MRA_0256	0.86	4.598	0.009
MRA_0167	0.86	4.649	0.009
MRA_3397	0.859	4.465	0.009
MRA_3357	0.859	4.653	0.009
MRA_1374	0.859	4.638	0.009
MRA_1371	0.859	4.473	0.009
MRA_0970	0.859	4.62	0.009
MRA_3531	0.858	4.606	0.009
MRA_2783	0.858	4.638	0.009
MRA_1521	0.858	4.615	0.009
MRA_0897	0.858	4.98	0.01
MRA_2955A	0.857	4.619	0.009
MRA_2809	0.857	4.923	0.01
MRA_2768	0.857	4.601	0.009
MRA_2210	0.857	4.853	0.01
MRA_1440	0.857	4.535	0.009
MRA_1258	0.857	4.399	0.009
MRA_0153	0.857	4.502	0.009
MRA_3493	0.856	4.781	0.01
MRA_3211	0.856	4.653	0.009
MRA_3209	0.856	4.563	0.009
MRA_3166	0.856	4.503	0.009
MRA_1544	0.856	4.415	0.009
MRA_0450	0.856	4.529	0.009
MRA_2806	0.855	4.418	0.009
MRA_2702	0.855	4.409	0.009
MRA_1984	0.855	4.433	0.009
MRA_1951	0.855	4.765	0.01
MRA_1135	0.855	4.753	0.01
MRA_0726	0.855	4.756	0.01
MRA_3943	0.854	4.608	0.009
MRA_3784	0.854	4.557	0.009
MRA_3655	0.854	4.638	0.009
MRA_2800	0.854	4.454	0.009
MRA_2038	0.854	4.568	0.009
MRA_1187	0.854	4.373	0.009
MRA_1101	0.854	4.362	0.009
MRA_1045	0.854	4.638	0.009
MRA_0768	0.854	4.709	0.009
MRA_0636	0.854	4.837	0.01
MRA_3471	0.853	4.463	0.009
MRA_3460	0.853	4.333	0.009
MRA_2976	0.853	4.441	0.009
MRA_2478	0.853	4.372	0.009
MRA_1678	0.853	4.307	0.009
MRA_1496	0.853	4.439	0.009
MRA_1330	0.853	4.738	0.009
MRA_0758	0.853	4.518	0.009
MRA_0389	0.853	4.362	0.009
MRA_3764	0.852	4.341	0.009
MRA_3605A	0.852	4.53	0.009
MRA_3109	0.852	4.343	0.009
MRA_2874	0.852	4.644	0.009
MRA_2673	0.852	4.667	0.009
MRA_1499	0.852	4.496	0.009
MRA_1058	0.852	4.423	0.009
MRA_2019	0.851	4.313	0.009
MRA_0949	0.851	4.346	0.009
MRA_0601	0.851	4.465	0.009
MRA_3678	0.85	4.358	0.009
MRA_3114	0.85	4.396	0.009
MRA_3035	0.85	4.373	0.009
MRA_1827	0.85	4.391	0.009
MRA_1592	0.85	4.487	0.009
MRA_0725	0.85	4.359	0.009
MRA_0546	0.85	4.659	0.009
MRA_3802	0.849	4.457	0.009
MRA_3634	0.849	4.68	0.009
MRA_2083	0.849	4.489	0.009
MRA_1418	0.849	4.509	0.009
MRA_1046	0.849	4.53	0.009
MRA_0082	0.849	4.253	0.009
MRA_3673	0.848	4.248	0.008
MRA_1749	0.848	4.468	0.009
MRA_1357	0.848	4.312	0.009
MRA_1206	0.848	4.529	0.009
MRA_1043	0.848	4.303	0.009
MRA_0708	0.848	4.169	0.008
MRA_0587	0.848	4.359	0.009
MRA_3901	0.847	4.293	0.009
MRA_3872	0.847	4.583	0.009
MRA_3615	0.847	4.216	0.008
MRA_3434	0.847	4.51	0.009
MRA_2296	0.847	4.207	0.008
MRA_2194	0.847	4.294	0.009
MRA_1933	0.847	4.357	0.009
MRA_0866	0.847	4.42	0.009
MRA_3710	0.846	4.472	0.009
MRA_2817	0.846	4.625	0.009
MRA_0892	0.846	4.155	0.008
MRA_0783	0.846	4.448	0.009
MRA_0442	0.846	4.383	0.009
MRA_0186	0.846	4.649	0.009
MRA_3843	0.845	4.655	0.009
MRA_3481	0.845	4.232	0.008
MRA_2377	0.845	5.257	0.011
MRA_2310	0.845	4.078	0.008
MRA_1432	0.845	4.35	0.009
MRA_3364	0.844	4.387	0.009
MRA_3028	0.844	4.386	0.009
MRA_2823	0.844	4.287	0.009
MRA_1248	0.844	4.76	0.01
MRA_1141	0.844	4.12	0.008
MRA_1024	0.844	4.447	0.009
MRA_2051	0.843	4.104	0.008
MRA_1941	0.843	4.178	0.008
MRA_1553	0.843	4.052	0.008
MRA_1107	0.843	4.398	0.009
MRA_0858	0.843	4.208	0.008
MRA_0674	0.843	4.247	0.008
MRA_0073	0.843	4.135	0.008
MRA_3248	0.842	4.199	0.008
MRA_2923	0.842	4.309	0.009
MRA_2771	0.842	4.105	0.008
MRA_2094	0.842	4.578	0.009
MRA_1982	0.842	4.05	0.008
MRA_1909	0.842	4.41	0.009
MRA_0927	0.842	4.218	0.008
MRA_3379	0.841	4.248	0.008
MRA_2733	0.841	4.241	0.008
MRA_2076	0.841	4.266	0.009
MRA_1716	0.841	4.614	0.009
MRA_0717	0.841	4.138	0.008
MRA_0078	0.841	4.736	0.009
MRA_3909	0.84	4.159	0.008
MRA_3763	0.84	4.183	0.008
MRA_2279	0.84	4.028	0.008
MRA_1042	0.84	3.991	0.008
MRA_0812	0.84	4.158	0.008
MRA_0803	0.84	4.269	0.009
MRA_3801	0.839	4.074	0.008
MRA_3262	0.839	4.099	0.008
MRA_2287	0.839	4.208	0.008
MRA_0615	0.839	4.262	0.009
MRA_3513	0.838	4.254	0.009
MRA_3393A	0.838	2.446	0.005
MRA_3328	0.838	4.067	0.008
MRA_3053	0.838	4.75	0.009
MRA_2805	0.838	4.284	0.009
MRA_2684	0.838	4.123	0.008
MRA_2322	0.838	4.353	0.009
MRA_1693	0.838	4.146	0.008
MRA_1143	0.838	4.088	0.008
MRA_0688	0.838	4.045	0.008
MRA_0683	0.838	4.292	0.009
MRA_0462	0.838	3.963	0.008
MRA_0322	0.838	4.006	0.008
MRA_0297	0.838	4.173	0.008
MRA_2994	0.837	4.363	0.009
MRA_2926	0.837	3.962	0.008
MRA_2699	0.837	4.406	0.009
MRA_0628	0.837	4.089	0.008
MRA_0456	0.837	4.505	0.009
MRA_0421	0.837	4.189	0.008
MRA_3578	0.836	3.97	0.008
MRA_1953	0.836	3.907	0.008
MRA_1734	0.836	3.932	0.008
MRA_1033	0.836	4.353	0.009
MRA_1018	0.836	4.207	0.008
MRA_0642	0.836	4.481	0.009
MRA_0157	0.836	4.271	0.009
MRA_3640	0.835	4.623	0.009
MRA_2931	0.835	4.141	0.008
MRA_2820	0.835	3.918	0.008
MRA_2653	0.835	4.39	0.009
MRA_2465	0.835	5.076	0.01
MRA_2362	0.835	3.933	0.008
MRA_2314	0.835	3.98	0.008
MRA_1923	0.835	3.853	0.008
MRA_1244	0.835	3.987	0.008
MRA_3914	0.834	4.182	0.008
MRA_3774	0.834	4.006	0.008
MRA_3468	0.834	4.407	0.009
MRA_2734	0.834	4.086	0.008
MRA_2315	0.834	3.928	0.008
MRA_2089	0.834	3.85	0.008
MRA_1620	0.834	4.216	0.008
MRA_1435	0.834	4.056	0.008
MRA_0739	0.834	4.016	0.008
MRA_0521	0.834	4.28	0.009
MRA_2656	0.833	3.92	0.008
MRA_2560	0.833	4.419	0.009
MRA_1616	0.833	4.002	0.008
MRA_0855	0.833	4.362	0.009
MRA_0667A	0.833	3.828	0.008
MRA_0426	0.833	4.697	0.009
MRA_3713	0.832	4.288	0.009
MRA_2912	0.832	3.962	0.008
MRA_2288A	0.832	1.05	0.002
MRA_2215	0.832	5.247	0.01
MRA_1996	0.832	4.098	0.008
MRA_1537	0.832	4.056	0.008
MRA_1355	0.832	3.864	0.008
MRA_1073	0.832	4.145	0.008
MRA_1049	0.832	3.813	0.008
MRA_0431	0.832	3.952	0.008
MRA_0267	0.832	3.952	0.008
MRA_3403	0.831	3.948	0.008
MRA_3231	0.831	4.204	0.008
MRA_3000	0.831	4.168	0.008
MRA_2683	0.831	3.993	0.008
MRA_2122	0.831	4.712	0.009
MRA_3913	0.83	4.051	0.008
MRA_2506	0.83	3.911	0.008
MRA_1978	0.83	4.043	0.008
MRA_1663	0.83	4.03	0.008
MRA_1426	0.83	3.908	0.008
MRA_1277	0.83	4.146	0.008
MRA_0730	0.83	3.84	0.008
MRA_0311	0.83	3.994	0.008
MRA_3852	0.829	3.824	0.008
MRA_3300	0.829	3.942	0.008
MRA_2889	0.829	3.857	0.008
MRA_1940	0.829	3.788	0.008
MRA_1702A	0.829	4.218	0.008
MRA_1167	0.829	3.956	0.008
MRA_3709	0.828	3.927	0.008
MRA_2965	0.828	3.72	0.007
MRA_2104	0.828	4.027	0.008
MRA_1957	0.828	3.88	0.008
MRA_1591	0.828	3.86	0.008
MRA_1257	0.828	3.993	0.008
MRA_0097	0.828	4.182	0.008
MRA_3785	0.827	3.909	0.008
MRA_3372	0.827	3.96	0.008
MRA_1491	0.827	3.967	0.008
MRA_1232	0.827	4.016	0.008
MRA_1185	0.827	4.06	0.008
MRA_1116	0.827	3.854	0.008
MRA_0938	0.827	3.998	0.008
MRA_0700A	0.827	3.968	0.008
MRA_0034	0.827	3.864	0.008
MRA_3832	0.826	4.178	0.008
MRA_3756	0.826	4.33	0.009
MRA_3719	0.826	3.874	0.008
MRA_3020	0.826	3.795	0.008
MRA_2161	0.826	3.859	0.008
MRA_2071	0.826	4.077	0.008
MRA_2014	0.826	3.96	0.008
MRA_1928	0.826	4.311	0.009
MRA_0273	0.826	4.062	0.008
MRA_3464	0.825	3.638	0.007
MRA_3359	0.825	4.642	0.009
MRA_2276	0.825	4.288	0.009
MRA_2152	0.825	5.894	0.012
MRA_2126	0.825	4.096	0.008
MRA_1075	0.825	3.74	0.007
MRA_0541	0.825	4.024	0.008
MRA_0533	0.825	3.793	0.008
MRA_2834	0.824	3.838	0.008
MRA_2301A	0.824	4.076	0.008
MRA_2092	0.824	4.227	0.008
MRA_1514	0.824	3.749	0.007
MRA_1019	0.824	3.82	0.008
MRA_3386	0.823	4.143	0.008
MRA_2736	0.823	3.669	0.007
MRA_2704	0.823	3.766	0.008
MRA_2687	0.823	3.603	0.007
MRA_2291	0.823	4.608	0.009
MRA_1991	0.823	3.695	0.007
MRA_1838	0.823	3.781	0.008
MRA_0906	0.823	4.162	0.008
MRA_3161	0.822	3.684	0.007
MRA_2106	0.822	4.438	0.009
MRA_0203	0.822	3.817	0.008
MRA_2336	0.821	3.72	0.007
MRA_1041	0.821	3.678	0.007
MRA_0910	0.821	3.658	0.007
MRA_0865	0.821	3.979	0.008
MRA_0703	0.821	4.018	0.008
MRA_1412	0.82	4.08	0.008
MRA_1352	0.82	4.419	0.009
MRA_1132	0.82	3.669	0.007
MRA_3158	0.819	3.974	0.008
MRA_0603	0.819	4.227	0.008
MRA_0023	0.819	4.034	0.008
MRA_1475	0.818	4.361	0.009
MRA_0412	0.818	3.938	0.008
MRA_2865	0.817	3.765	0.008
MRA_2772	0.817	4.239	0.008
MRA_0772	0.817	3.488	0.007
MRA_3563	0.816	4.049	0.008
MRA_3240	0.816	4.024	0.008
MRA_1561	0.816	3.651	0.007
MRA_1149	0.816	4.464	0.009
MRA_0562	0.816	3.775	0.008
MRA_0067	0.816	4.018	0.008
MRA_3589	0.815	3.453	0.007
MRA_2779	0.815	3.875	0.008
MRA_2389	0.815	3.523	0.007
MRA_1063	0.815	3.649	0.007
MRA_0723	0.815	3.567	0.007
MRA_0598	0.815	3.606	0.007
MRA_0195	0.815	3.817	0.008
MRA_3887	0.814	3.488	0.007
MRA_1925	0.814	3.744	0.007
MRA_1845	0.814	3.745	0.007
MRA_0827	0.814	3.997	0.008
MRA_0611	0.814	3.589	0.007
MRA_0527	0.814	3.494	0.007
MRA_3885	0.813	4.082	0.008
MRA_3096	0.813	3.734	0.007
MRA_2971	0.813	3.92	0.008
MRA_2282	0.813	3.908	0.008
MRA_2087	0.813	3.822	0.008
MRA_1707	0.813	3.623	0.007
MRA_1679A	0.813	4.311	0.009
MRA_0110	0.813	4.399	0.009
MRA_3400	0.812	3.506	0.007
MRA_3314	0.812	3.676	0.007
MRA_2516	0.812	3.552	0.007
MRA_2101	0.812	3.527	0.007
MRA_1949	0.812	3.535	0.007
MRA_0778	0.812	3.867	0.008
MRA_0526	0.812	4.045	0.008
MRA_0477	0.812	3.604	0.007
MRA_2629	0.811	4.191	0.008
MRA_2160	0.811	3.779	0.008
MRA_2154	0.811	2.515	0.005
MRA_1120	0.811	3.516	0.007
MRA_0940	0.811	3.508	0.007
MRA_0918	0.811	3.358	0.007
MRA_0084	0.811	3.627	0.007
MRA_3951	0.81	3.385	0.007
MRA_3649B	0.81	3.411	0.007
MRA_3499	0.81	3.527	0.007
MRA_3058	0.81	3.62	0.007
MRA_1280	0.81	3.638	0.007
MRA_0968	0.81	1.891	0.004
MRA_3962	0.809	3.575	0.007
MRA_2407	0.809	3.413	0.007
MRA_1138	0.809	3.712	0.007
MRA_0027	0.809	3.507	0.007
MRA_3564	0.808	3.394	0.007
MRA_2257	0.808	3.639	0.007
MRA_1764	0.808	3.908	0.008
MRA_0530	0.808	3.429	0.007
MRA_0130	0.808	4.034	0.008
MRA_3287	0.807	3.571	0.007
MRA_2544	0.807	3.945	0.008
MRA_1918	0.807	3.923	0.008
MRA_1733	0.807	3.321	0.007
MRA_0999	0.807	1.242	0.002
MRA_0706	0.807	3.407	0.007
MRA_0105	0.807	3.554	0.007
MRA_3358	0.806	4.404	0.009
MRA_1118	0.806	3.704	0.007
MRA_0370	0.806	4.628	0.009
MRA_2782	0.805	3.571	0.007
MRA_2522	0.805	3.462	0.007
MRA_2582	0.804	3.377	0.007
MRA_1520	0.804	3.342	0.007
MRA_3726	0.803	3.773	0.008
MRA_3220	0.803	3.71	0.007
MRA_3078	0.803	3.628	0.007
MRA_3076	0.803	3.481	0.007
MRA_1273	0.803	3.514	0.007
MRA_0700	0.803	3.344	0.007
MRA_2690A	0.802	4.26	0.009
MRA_2052	0.802	3.53	0.007
MRA_2001	0.802	3.629	0.007
MRA_1453	0.802	3.288	0.007
MRA_0991	0.802	3.694	0.007
MRA_0856	0.802	3.6	0.007
MRA_0063	0.802	3.263	0.007
MRA_2476	0.801	3.604	0.007
MRA_2166	0.801	3.338	0.007
MRA_0491	0.801	3.598	0.007
MRA_3627	0.8	3.441	0.007
MRA_2891	0.8	3.731	0.007
MRA_1965	0.8	3.214	0.006
MRA_0363	0.8	3.716	0.007
MRA_0128	0.8	3.526	0.007
MRA_2861	0.799	3.384	0.007
MRA_2577	0.799	3.402	0.007
MRA_2164	0.799	3.47	0.007
MRA_1649	0.799	3.478	0.007
MRA_1618	0.799	3.38	0.007
MRA_0684	0.799	3.171	0.006
MRA_3721	0.798	3.571	0.007
MRA_3704	0.798	3.938	0.008
MRA_3679	0.798	3.557	0.007
MRA_3242	0.798	3.594	0.007
MRA_3163	0.798	3.169	0.006
MRA_3079	0.798	3.275	0.007
MRA_2776	0.798	3.448	0.007
MRA_2495	0.798	3.274	0.007
MRA_0763	0.798	4.53	0.009
MRA_0377	0.798	3.397	0.007
MRA_0204	0.798	3.394	0.007
MRA_3716	0.797	3.71	0.007
MRA_1922	0.797	3.469	0.007
MRA_1421	0.797	3.391	0.007
MRA_0045	0.797	3.183	0.006
MRA_3958	0.796	3.25	0.006
MRA_1595	0.796	3.817	0.008
MRA_0896	0.796	3.24	0.006
MRA_0641	0.796	3.386	0.007
MRA_0193	0.796	3.158	0.006
MRA_2500A	0.795	3.362	0.007
MRA_2431	0.795	3.342	0.007
MRA_1960	0.795	3.618	0.007
MRA_1343	0.795	3.894	0.008
MRA_0485	0.795	3.296	0.007
MRA_3949	0.794	3.313	0.007
MRA_3492	0.794	3.864	0.008
MRA_3138	0.794	3.322	0.007
MRA_2948	0.794	3.421	0.007
MRA_2361	0.794	3.263	0.007
MRA_2006	0.794	3.273	0.007
MRA_1907	0.794	3.111	0.006
MRA_1218	0.794	3.314	0.007
MRA_0757	0.794	3.277	0.007
MRA_0716	0.794	3.174	0.006
MRA_0037	0.794	3.241	0.006
MRA_3167	0.793	3.308	0.007
MRA_2787	0.793	3.832	0.008
MRA_2760	0.793	3.341	0.007
MRA_2711	0.793	3.376	0.007
MRA_2681	0.793	3.278	0.007
MRA_2662	0.793	3.163	0.006
MRA_0675	0.793	3.462	0.007
MRA_0058	0.793	3.655	0.007
MRA_3690	0.792	3.51	0.007
MRA_3223	0.792	3.524	0.007
MRA_2669	0.792	3.372	0.007
MRA_2400	0.792	3.432	0.007
MRA_1765	0.792	4.074	0.008
MRA_1342	0.792	3.268	0.007
MRA_1288	0.792	3.223	0.006
MRA_0667	0.792	3.268	0.007
MRA_3706	0.791	3.547	0.007
MRA_3322	0.791	3.263	0.007
MRA_2437	0.791	3.26	0.007
MRA_1253	0.791	3.038	0.006
MRA_0644	0.791	3.21	0.006
MRA_0250	0.791	3.089	0.006
MRA_0184	0.791	3.638	0.007
MRA_0026	0.791	3.247	0.006
MRA_3572	0.79	3.819	0.008
MRA_3566	0.79	3.208	0.006
MRA_2998	0.79	3.114	0.006
MRA_2043	0.79	3.515	0.007
MRA_1942	0.79	3.153	0.006
MRA_1383A	0.79	3.125	0.006
MRA_1099	0.79	3.721	0.007
MRA_1069	0.79	3.063	0.006
MRA_3393	0.789	3.548	0.007
MRA_2690	0.789	3.049	0.006
MRA_1812	0.789	3.497	0.007
MRA_1508	0.789	3.335	0.007
MRA_1329A	0.789	3.645	0.007
MRA_1037	0.789	3.305	0.007
MRA_0707	0.789	3.078	0.006
MRA_3362	0.788	3.298	0.007
MRA_2268	0.788	3.163	0.006
MRA_1290	0.788	3.126	0.006
MRA_3944	0.787	2.97	0.006
MRA_1245	0.787	3.158	0.006
MRA_0569	0.787	2.967	0.006
MRA_0532	0.787	3.423	0.007
MRA_3866	0.786	3.111	0.006
MRA_3099	0.786	3.214	0.006
MRA_2332	0.786	3.79	0.008
MRA_2259	0.786	3.236	0.006
MRA_2111	0.786	3.056	0.006
MRA_2072	0.786	3.688	0.007
MRA_1864	0.786	3.279	0.007
MRA_3700	0.785	2.974	0.006
MRA_3050	0.785	3.138	0.006
MRA_2623A	0.785	3.612	0.007
MRA_0926	0.785	3.137	0.006
MRA_0419	0.785	3.41	0.007
MRA_0122	0.785	3.016	0.006
MRA_3586	0.784	3.446	0.007
MRA_3528	0.784	3.833	0.008
MRA_3175	0.784	3.07	0.006
MRA_3131	0.784	3.334	0.007
MRA_2799	0.784	3.216	0.006
MRA_1823	0.784	3.618	0.007
MRA_0709	0.784	3.105	0.006
MRA_0645	0.784	3.725	0.007
MRA_3102	0.783	3.197	0.006
MRA_2998A	0.783	2.983	0.006
MRA_2803	0.783	3.037	0.006
MRA_2408	0.783	3.011	0.006
MRA_0669	0.783	2.951	0.006
MRA_0307	0.783	3.391	0.007
MRA_0216	0.783	2.933	0.006
MRA_3908	0.782	3.256	0.007
MRA_2727	0.782	3.273	0.007
MRA_2574	0.782	3.459	0.007
MRA_1669	0.782	3.036	0.006
MRA_1627	0.782	3.063	0.006
MRA_1442	0.782	3.494	0.007
MRA_1017	0.782	2.994	0.006
MRA_0625	0.782	3.08	0.006
MRA_3514	0.781	3.337	0.007
MRA_3508	0.781	3.171	0.006
MRA_3421	0.781	3.337	0.007
MRA_3367	0.781	3.337	0.007
MRA_3218	0.781	3.337	0.007
MRA_2839	0.781	3.337	0.007
MRA_2677	0.781	3.337	0.007
MRA_2505	0.781	3.337	0.007
MRA_2378	0.781	3.337	0.007
MRA_2297	0.781	3.337	0.007
MRA_2204	0.781	2.942	0.006
MRA_2183	0.781	3.337	0.007
MRA_2120	0.781	3.337	0.007
MRA_1843	0.781	2.99	0.006
MRA_1777	0.781	3.337	0.007
MRA_1770	0.781	3.337	0.007
MRA_1768	0.781	3.337	0.007
MRA_1380	0.781	3.337	0.007
MRA_1234	0.781	2.982	0.006
MRA_1009	0.781	3.15	0.006
MRA_0901	0.781	3.063	0.006
MRA_0805	0.781	3.337	0.007
MRA_0038	0.781	2.929	0.006
MRA_0012	0.781	3.337	0.007
MRA_3504	0.78	3.297	0.007
MRA_3476	0.78	3.527	0.007
MRA_2283	0.78	2.963	0.006
MRA_1585	0.78	2.93	0.006
MRA_1007	0.78	3.043	0.006
MRA_0668	0.78	2.959	0.006
MRA_3004	0.779	3.749	0.007
MRA_2537	0.779	3.398	0.007
MRA_1634	0.779	3.922	0.008
MRA_0591	0.779	2.889	0.006
MRA_0048	0.779	3.147	0.006
MRA_2835	0.778	2.972	0.006
MRA_0687A	0.778	2.902	0.006
MRA_3935	0.777	1.227	0.002
MRA_1786	0.777	2.97	0.006
MRA_1606	0.777	3.325	0.007
MRA_1180	0.777	3.014	0.006
MRA_0895	0.777	3.311	0.007
MRA_0313	0.777	4.099	0.008
MRA_0292	0.777	3.232	0.006
MRA_3733	0.776	3.364	0.007
MRA_3038	0.776	2.857	0.006
MRA_2898	0.776	2.997	0.006
MRA_2202	0.776	2.894	0.006
MRA_1768A	0.776	3.05	0.006
MRA_1365	0.776	3.091	0.006
MRA_1134	0.776	2.818	0.006
MRA_0741	0.776	2.965	0.006
MRA_0364	0.776	3.907	0.008
MRA_0319	0.776	3.1	0.006
MRA_2716	0.775	3.219	0.006
MRA_2367	0.775	3.206	0.006
MRA_2341	0.775	3.096	0.006
MRA_1349	0.775	2.87	0.006
MRA_0182	0.775	2.835	0.006
MRA_2571	0.774	3.158	0.006
MRA_0565	0.774	3.035	0.006
MRA_3896	0.773	3.367	0.007
MRA_3751	0.773	3.017	0.006
MRA_3014	0.773	3.008	0.006
MRA_2676	0.773	2.841	0.006
MRA_2343	0.773	3.124	0.006
MRA_2329A	0.773	2.826	0.006
MRA_1787	0.773	3.041	0.006
MRA_1170	0.773	3.113	0.006
MRA_0835	0.773	2.898	0.006
MRA_0613	0.773	3.247	0.006
MRA_3236	0.772	2.942	0.006
MRA_2479	0.772	3.119	0.006
MRA_0050	0.772	3.252	0.007
MRA_3585	0.771	1.011	0.002
MRA_3517	0.771	3.183	0.006
MRA_3198	0.771	2.833	0.006
MRA_2430	0.771	3.314	0.007
MRA_1900	0.771	3.26	0.007
MRA_3329	0.77	3.254	0.007
MRA_2621	0.77	3.472	0.007
MRA_2186	0.77	3.321	0.007
MRA_1268	0.77	2.865	0.006
MRA_1096	0.77	2.991	0.006
MRA_3953	0.769	3.047	0.006
MRA_3106	0.769	3.159	0.006
MRA_2828	0.769	2.73	0.005
MRA_2539	0.769	2.935	0.006
MRA_1932	0.769	2.728	0.005
MRA_0470	0.769	3.397	0.007
MRA_3859	0.768	3.111	0.006
MRA_3836	0.768	3.119	0.006
MRA_2647	0.768	3.024	0.006
MRA_2201	0.768	2.906	0.006
MRA_1894	0.768	3.073	0.006
MRA_0557	0.768	2.841	0.006
MRA_3696	0.767	3.069	0.006
MRA_2707	0.767	2.78	0.006
MRA_2575	0.767	2.804	0.006
MRA_2345	0.767	3.512	0.007
MRA_2049	0.767	2.894	0.006
MRA_1987	0.767	2.841	0.006
MRA_1695	0.767	2.841	0.006
MRA_2568	0.766	2.71	0.005
MRA_2175	0.766	3.098	0.006
MRA_1270	0.766	2.969	0.006
MRA_0919	0.766	2.844	0.006
MRA_3810	0.765	3.39	0.007
MRA_3479	0.765	2.805	0.006
MRA_2933	0.765	2.8	0.006
MRA_2233	0.765	3.008	0.006
MRA_2056	0.765	3.303	0.007
MRA_1779	0.765	2.96	0.006
MRA_1399	0.765	2.707	0.005
MRA_0936	0.765	2.955	0.006
MRA_2302	0.764	2.953	0.006
MRA_1219	0.764	3.654	0.007
MRA_0823	0.764	3.045	0.006
MRA_0633	0.764	2.894	0.006
MRA_3938	0.763	1.893	0.004
MRA_3276	0.763	2.671	0.005
MRA_2222	0.763	3.086	0.006
MRA_1448	0.763	3.145	0.006
MRA_1278	0.763	2.831	0.006
MRA_1070	0.763	2.884	0.006
MRA_2371	0.762	2.595	0.005
MRA_2058	0.762	2.75	0.005
MRA_1916	0.762	2.808	0.006
MRA_0873	0.762	2.712	0.005
MRA_3786	0.761	2.654	0.005
MRA_2374	0.761	3.558	0.007
MRA_2070	0.761	2.754	0.006
MRA_1831	0.761	3.526	0.007
MRA_1679	0.761	2.981	0.006
MRA_0769	0.761	2.865	0.006
MRA_0123	0.761	3.197	0.006
MRA_3671	0.76	2.925	0.006
MRA_3274	0.76	2.567	0.005
MRA_3235	0.76	2.986	0.006
MRA_3187	0.76	3.007	0.006
MRA_1839	0.76	2.991	0.006
MRA_1397	0.76	2.861	0.006
MRA_0905A	0.76	3.446	0.007
MRA_0765	0.76	3.055	0.006
MRA_0571	0.76	2.7	0.005
MRA_3597	0.759	3.471	0.007
MRA_1560	0.759	3.375	0.007
MRA_1382	0.759	2.698	0.005
MRA_1127	0.759	3.058	0.006
MRA_3948	0.758	2.622	0.005
MRA_3930	0.758	2.344	0.005
MRA_3192	0.758	3.539	0.007
MRA_2518	0.758	2.784	0.006
MRA_1552	0.758	2.968	0.006
MRA_1443	0.758	3.311	0.007
MRA_3771	0.757	2.912	0.006
MRA_3648	0.757	2.733	0.005
MRA_3456	0.757	2.897	0.006
MRA_2784	0.757	2.697	0.005
MRA_2764	0.757	3.192	0.006
MRA_2380	0.757	3.746	0.007
MRA_2290	0.757	3.083	0.006
MRA_3261	0.756	2.602	0.005
MRA_1997	0.756	3.378	0.007
MRA_1517	0.756	2.778	0.006
MRA_0367	0.756	2.526	0.005
MRA_0325	0.756	2.786	0.006
MRA_2919	0.755	2.714	0.005
MRA_2068	0.755	3.74	0.007
MRA_1730	0.755	3.08	0.006
MRA_1196	0.755	2.73	0.005
MRA_0507	0.755	2.649	0.005
MRA_0405	0.755	2.603	0.005
MRA_0138	0.755	2.867	0.006
MRA_3792	0.754	2.701	0.005
MRA_3153	0.754	2.552	0.005
MRA_2583	0.754	2.566	0.005
MRA_1899A	0.754	2.766	0.006
MRA_1783	0.754	2.844	0.006
MRA_0887	0.754	2.721	0.005
MRA_0358	0.754	3.163	0.006
MRA_0246	0.754	3.038	0.006
MRA_3831	0.753	2.828	0.006
MRA_2240	0.753	2.558	0.005
MRA_2038A	0.753	2.613	0.005
MRA_1731	0.753	3.115	0.006
MRA_0744	0.753	3.614	0.007
MRA_3883	0.752	2.916	0.006
MRA_3748	0.752	2.854	0.006
MRA_2664	0.752	2.731	0.005
MRA_2018	0.752	2.586	0.005
MRA_1404	0.752	2.638	0.005
MRA_1150	0.752	3.397	0.007
MRA_0198	0.752	3.114	0.006
MRA_3268	0.751	2.753	0.006
MRA_1407	0.751	2.814	0.006
MRA_1066	0.751	3.026	0.006
MRA_0847	0.751	2.577	0.005
MRA_0736	0.751	2.534	0.005
MRA_2357	0.75	2.614	0.005
MRA_1133	0.75	2.842	0.006
MRA_3803	0.749	2.631	0.005
MRA_2840	0.749	2.754	0.006
MRA_2490	0.749	2.655	0.005
MRA_2281	0.749	2.495	0.005
MRA_1952	0.749	2.638	0.005
MRA_0042	0.749	2.771	0.006
MRA_3649	0.748	2.966	0.006
MRA_2858	0.748	2.53	0.005
MRA_2370	0.748	2.443	0.005
MRA_2245	0.748	2.61	0.005
MRA_2936	0.747	2.554	0.005
MRA_2637	0.747	2.521	0.005
MRA_2418	0.747	2.596	0.005
MRA_2189	0.747	2.841	0.006
MRA_1744	0.747	2.808	0.006
MRA_2004	0.746	2.87	0.006
MRA_1901	0.746	2.596	0.005
MRA_1859	0.746	2.499	0.005
MRA_1117	0.746	2.622	0.005
MRA_0449	0.746	2.501	0.005
MRA_0139	0.746	2.474	0.005
MRA_0028	0.746	2.709	0.005
MRA_3711	0.745	2.425	0.005
MRA_3525	0.745	2.466	0.005
MRA_2856	0.745	2.75	0.006
MRA_2730	0.745	2.564	0.005
MRA_0349	0.745	2.478	0.005
MRA_1762	0.744	2.595	0.005
MRA_2110	0.743	2.574	0.005
MRA_2073	0.743	3.14	0.006
MRA_1710	0.743	2.427	0.005
MRA_2802	0.742	2.651	0.005
MRA_2024	0.742	2.58	0.005
MRA_1347	0.742	2.521	0.005
MRA_1752	0.741	2.751	0.006
MRA_1737	0.741	2.575	0.005
MRA_1306	0.741	2.533	0.005
MRA_0988	0.741	0.911	0.002
MRA_0550	0.741	2.658	0.005
MRA_3822	0.74	2.679	0.005
MRA_3258	0.74	2.762	0.006
MRA_3168	0.74	3.001	0.006
MRA_2635	0.74	2.508	0.005
MRA_2230	0.74	3.151	0.006
MRA_1583	0.74	2.737	0.005
MRA_0913	0.74	2.566	0.005
MRA_0728	0.74	3.079	0.006
MRA_0228	0.74	2.537	0.005
MRA_3761	0.739	2.741	0.005
MRA_3064	0.739	3.175	0.006
MRA_1391	0.739	2.972	0.006
MRA_0957	0.739	2.751	0.006
MRA_0312	0.739	2.546	0.005
MRA_0136	0.739	2.67	0.005
MRA_2970	0.738	3.257	0.007
MRA_1738	0.738	2.378	0.005
MRA_1593	0.738	2.659	0.005
MRA_1035	0.738	2.692	0.005
MRA_0651	0.738	2.531	0.005
MRA_0085	0.738	2.488	0.005
MRA_3295	0.737	2.397	0.005
MRA_2871	0.737	2.425	0.005
MRA_0816	0.737	2.55	0.005
MRA_2888	0.736	2.524	0.005
MRA_1230	0.736	2.409	0.005
MRA_0617	0.736	2.916	0.006
MRA_2084	0.735	2.515	0.005
MRA_1596	0.735	2.717	0.005
MRA_1284	0.735	2.494	0.005
MRA_0280	0.735	2.541	0.005
MRA_0065	0.735	2.292	0.005
MRA_3210	0.734	2.689	0.005
MRA_3200	0.734	2.556	0.005
MRA_3019	0.734	2.497	0.005
MRA_2796	0.734	2.411	0.005
MRA_0602	0.734	2.406	0.005
MRA_0293	0.734	2.389	0.005
MRA_3819	0.733	2.39	0.005
MRA_3647	0.733	2.53	0.005
MRA_3478	0.733	2.612	0.005
MRA_2554	0.733	2.511	0.005
MRA_2274	0.733	2.711	0.005
MRA_1789	0.733	2.418	0.005
MRA_1384	0.733	2.417	0.005
MRA_0382	0.733	2.701	0.005
MRA_0126	0.733	2.316	0.005
MRA_3535	0.732	2.308	0.005
MRA_2116	0.732	2.525	0.005
MRA_0374	0.732	2.967	0.006
MRA_3924	0.731	2.498	0.005
MRA_3230	0.731	2.425	0.005
MRA_2525	0.731	2.452	0.005
MRA_2451	0.731	2.5	0.005
MRA_1828	0.731	2.663	0.005
MRA_1724	0.731	2.554	0.005
MRA_3539	0.73	2.51	0.005
MRA_1946	0.73	2.461	0.005
MRA_1895	0.73	2.508	0.005
MRA_0443	0.73	2.332	0.005
MRA_0285	0.73	2.434	0.005
MRA_3934	0.729	3.785	0.008
MRA_3643	0.729	2.674	0.005
MRA_3424	0.729	2.264	0.005
MRA_2278	0.729	2.505	0.005
MRA_2005	0.729	2.6	0.005
MRA_2000	0.729	3.017	0.006
MRA_1969	0.729	2.434	0.005
MRA_1927	0.729	2.462	0.005
MRA_1433	0.729	2.63	0.005
MRA_0334	0.729	2.388	0.005
MRA_2689	0.728	2.443	0.005
MRA_2550	0.728	2.832	0.006
MRA_1972	0.728	2.337	0.005
MRA_1945	0.728	2.381	0.005
MRA_3491	0.727	2.501	0.005
MRA_3285	0.727	2.235	0.004
MRA_2325	0.727	2.36	0.005
MRA_2030	0.727	2.707	0.005
MRA_0969	0.727	2.821	0.006
MRA_0722	0.727	2.357	0.005
MRA_3363	0.726	2.417	0.005
MRA_2241	0.726	2.593	0.005
MRA_1795	0.726	2.402	0.005
MRA_1525	0.726	2.505	0.005
MRA_0152	0.726	2.43	0.005
MRA_3431	0.725	2.339	0.005
MRA_2720	0.725	2.54	0.005
MRA_2644	0.725	2.261	0.005
MRA_2450	0.725	2.315	0.005
MRA_2390	0.725	2.36	0.005
MRA_1460	0.725	2.268	0.005
MRA_1137	0.725	2.345	0.005
MRA_1008	0.725	2.521	0.005
MRA_0551	0.725	3.203	0.006
MRA_0177	0.725	2.438	0.005
MRA_3542	0.724	2.591	0.005
MRA_2798	0.724	2.403	0.005
MRA_2514	0.724	2.514	0.005
MRA_2486	0.724	2.349	0.005
MRA_0653	0.724	2.551	0.005
MRA_0418	0.724	3.301	0.007
MRA_3835	0.723	2.347	0.005
MRA_3651	0.723	2.442	0.005
MRA_3225	0.723	2.486	0.005
MRA_3197	0.723	2.354	0.005
MRA_2213	0.723	2.467	0.005
MRA_2156	0.723	4.963	0.01
MRA_1178	0.723	2.34	0.005
MRA_0985A	0.723	2.622	0.005
MRA_3895	0.722	2.554	0.005
MRA_3860	0.722	2.194	0.004
MRA_1171	0.722	2.377	0.005
MRA_3390	0.721	2.867	0.006
MRA_0776	0.721	2.694	0.005
MRA_0536	0.721	2.312	0.005
MRA_0561	0.72	2.191	0.004
MRA_3873	0.719	2.609	0.005
MRA_2185	0.719	2.197	0.004
MRA_2143	0.719	2.376	0.005
MRA_1995	0.719	3.167	0.006
MRA_1725	0.719	2.442	0.005
MRA_1304	0.719	2.223	0.004
MRA_0231	0.719	2.287	0.005
MRA_3906	0.718	2.24	0.004
MRA_3598	0.718	2.348	0.005
MRA_3392	0.718	2.535	0.005
MRA_2909	0.718	2.604	0.005
MRA_1154	0.718	2.707	0.005
MRA_0543	0.718	2.151	0.004
MRA_0492	0.718	2.272	0.005
MRA_2886	0.717	2.3	0.005
MRA_1340	0.717	2.312	0.005
MRA_0080	0.717	2.482	0.005
MRA_2986	0.716	2.155	0.004
MRA_2826	0.716	2.276	0.005
MRA_2181	0.716	2.506	0.005
MRA_1964	0.716	2.29	0.005
MRA_1760	0.716	2.37	0.005
MRA_1586	0.716	2.268	0.005
MRA_0502	0.716	2.539	0.005
MRA_0341	0.716	2.302	0.005
MRA_0181	0.716	2.325	0.005
MRA_2586	0.715	2.287	0.005
MRA_1758	0.715	2.521	0.005
MRA_0455	0.715	2.809	0.006
MRA_3505	0.714	2.376	0.005
MRA_3241	0.714	2.611	0.005
MRA_2775	0.714	2.12	0.004
MRA_2457	0.714	2.355	0.005
MRA_1487	0.714	2.162	0.004
MRA_0925	0.714	2.616	0.005
MRA_0572	0.714	2.292	0.005
MRA_0428	0.714	2.36	0.005
MRA_0049	0.714	2.254	0.005
MRA_3445	0.713	2.42	0.005
MRA_2833	0.713	2.254	0.005
MRA_1959	0.713	2.214	0.004
MRA_1501	0.713	2.24	0.004
MRA_1376	0.713	2.845	0.006
MRA_0947	0.713	2.153	0.004
MRA_3081	0.712	0.476	0.001
MRA_1358	0.712	2.296	0.005
MRA_1324	0.712	2.221	0.004
MRA_0770	0.712	2.175	0.004
MRA_0760	0.712	2.139	0.004
MRA_0241	0.712	2.258	0.005
MRA_3685	0.711	2.481	0.005
MRA_3414	0.711	2.241	0.004
MRA_3246	0.711	2.364	0.005
MRA_3130	0.711	2.314	0.005
MRA_1694	0.711	2.101	0.004
MRA_1408	0.711	2.163	0.004
MRA_1370	0.711	2.666	0.005
MRA_1223	0.711	2.32	0.005
MRA_0875	0.711	2.705	0.005
MRA_3851	0.71	2.13	0.004
MRA_3560	0.71	2.302	0.005
MRA_3487	0.71	2.311	0.005
MRA_3011	0.71	2.112	0.004
MRA_2565	0.71	2.551	0.005
MRA_2342	0.71	2.067	0.004
MRA_2333	0.71	2.363	0.005
MRA_2028	0.71	2.243	0.004
MRA_2012	0.71	2.067	0.004
MRA_1387	0.71	2.086	0.004
MRA_1128	0.71	2.476	0.005
MRA_3583	0.709	2.045	0.004
MRA_2693	0.709	3.123	0.006
MRA_3408	0.708	2.353	0.005
MRA_3405	0.708	2.158	0.004
MRA_1824	0.708	2.111	0.004
MRA_3344	0.707	2.046	0.004
MRA_2954	0.707	2.051	0.004
MRA_2825	0.707	2.221	0.004
MRA_2749A	0.707	2.095	0.004
MRA_2598	0.707	2.279	0.005
MRA_2604	0.706	2.751	0.006
MRA_1498	0.706	2.685	0.005
MRA_0935	0.706	2.27	0.005
MRA_0387	0.706	2.087	0.004
MRA_0079	0.706	2.142	0.004
MRA_2416	0.705	2.33	0.005
MRA_1750	0.705	2.197	0.004
MRA_1588	0.705	2.663	0.005
MRA_0909	0.705	2.174	0.004
MRA_0308	0.705	2.248	0.004
MRA_0092	0.705	2.163	0.004
MRA_3928	0.704	2.222	0.004
MRA_2227	0.704	2.283	0.005
MRA_1545	0.704	2.075	0.004
MRA_0600	0.704	2.095	0.004
MRA_0596	0.704	2.044	0.004
MRA_0324	0.704	2.934	0.006
MRA_0315	0.704	2.172	0.004
MRA_0149	0.704	2.263	0.005
MRA_0015	0.704	2.021	0.004
MRA_3804	0.703	2.069	0.004
MRA_0774	0.703	2.158	0.004
MRA_0556	0.703	2.208	0.004
MRA_0140	0.703	2.113	0.004
MRA_3663	0.702	2.473	0.005
MRA_1417	0.702	2.024	0.004
MRA_1199	0.702	2.086	0.004
MRA_0606	0.702	2.236	0.004
MRA_3929	0.701	2.495	0.005
MRA_3604	0.701	2.021	0.004
MRA_1655	0.701	2.073	0.004
MRA_1610	0.701	2.09	0.004
MRA_0759	0.701	2.124	0.004
MRA_3299	0.7	2.09	0.004
MRA_3214	0.7	1.966	0.004
MRA_2301	0.7	2.144	0.004
MRA_1479	0.7	2.411	0.005
MRA_0793	0.7	2.163	0.004
MRA_0547	0.7	2.281	0.005
MRA_0523	0.7	2.405	0.005
MRA_0425	0.7	2.189	0.004
MRA_2953	0.699	2.071	0.004
MRA_2468	0.699	2.204	0.004
MRA_0671	0.699	2.491	0.005
MRA_0621	0.699	2.066	0.004
MRA_0434	0.699	2.129	0.004
MRA_0381	0.699	2.077	0.004
MRA_0376	0.699	2.196	0.004
MRA_0281	0.699	2.163	0.004
MRA_2248	0.698	2.342	0.005
MRA_2218	0.698	1.992	0.004
MRA_1835	0.698	2.06	0.004
MRA_0632	0.698	2.284	0.005
MRA_0429A	0.698	2.501	0.005
MRA_3432	0.697	2.007	0.004
MRA_2497	0.697	1.94	0.004
MRA_2265	0.697	1.974	0.004
MRA_3447	0.696	2.239	0.004
MRA_1948	0.696	2.052	0.004
MRA_0984	0.696	3.505	0.007
MRA_3283	0.695	2.026	0.004
MRA_3040	0.695	2.237	0.004
MRA_2766A	0.695	2.014	0.004
MRA_2636	0.695	2.28	0.005
MRA_2338	0.695	1.985	0.004
MRA_2267	0.695	1.992	0.004
MRA_2129	0.695	2.071	0.004
MRA_1844	0.695	2.302	0.005
MRA_1791	0.695	2.046	0.004
MRA_1263	0.695	2.156	0.004
MRA_0330	0.695	2.161	0.004
MRA_0178	0.695	2.064	0.004
MRA_3853	0.694	2.108	0.004
MRA_3683	0.694	2.248	0.004
MRA_3282	0.694	2.071	0.004
MRA_3126	0.694	2.452	0.005
MRA_2348	0.694	2.217	0.004
MRA_2157	0.694	0.972	0.002
MRA_1884	0.694	2.001	0.004
MRA_1882	0.694	2.087	0.004
MRA_1872	0.694	2.49	0.005
MRA_1147	0.694	2.495	0.005
MRA_3346	0.693	1.988	0.004
MRA_3104	0.693	1.979	0.004
MRA_3082	0.693	5.832	0.012
MRA_1958	0.693	2.301	0.005
MRA_3089	0.692	2.224	0.004
MRA_2519	0.692	2.046	0.004
MRA_2485	0.692	2.024	0.004
MRA_2172	0.692	2.064	0.004
MRA_1992	0.692	1.941	0.004
MRA_1800	0.692	2.292	0.005
MRA_1547	0.692	2.038	0.004
MRA_3606	0.691	2.03	0.004
MRA_3121	0.691	1.935	0.004
MRA_2567	0.691	2.118	0.004
MRA_2243	0.691	2.1	0.004
MRA_1474	0.691	2.216	0.004
MRA_0362	0.691	2.227	0.004
MRA_0052	0.691	2.587	0.005
MRA_3202	0.69	1.909	0.004
MRA_2587	0.69	2.079	0.004
MRA_1756	0.69	2.178	0.004
MRA_1386	0.69	2.107	0.004
MRA_0061	0.69	2.282	0.005
MRA_1920	0.689	2.155	0.004
MRA_1531	0.689	2.015	0.004
MRA_0829	0.689	2.152	0.004
MRA_3849	0.688	2.074	0.004
MRA_1476	0.688	1.912	0.004
MRA_1255A	0.688	2.248	0.004
MRA_1177	0.688	1.972	0.004
MRA_0143	0.688	2.088	0.004
MRA_3233	0.687	1.983	0.004
MRA_3146	0.687	1.964	0.004
MRA_2918	0.687	1.898	0.004
MRA_0817	0.687	2.625	0.005
MRA_2632	0.686	2.47	0.005
MRA_0564	0.686	2.011	0.004
MRA_2369	0.685	1.922	0.004
MRA_1320	0.685	2.668	0.005
MRA_1091	0.685	2.699	0.005
MRA_0934	0.685	1.888	0.004
MRA_0083	0.685	1.888	0.004
MRA_3760	0.684	2.667	0.005
MRA_3728	0.684	2.073	0.004
MRA_1939	0.684	1.918	0.004
MRA_1551	0.684	2.618	0.005
MRA_1207	0.684	2.005	0.004
MRA_0790	0.684	2.165	0.004
MRA_0771A	0.684	2.165	0.004
MRA_0586	0.684	1.883	0.004
MRA_0209	0.684	4.232	0.008
MRA_3190	0.683	2.047	0.004
MRA_1214	0.683	2.212	0.004
MRA_0867	0.683	1.901	0.004
MRA_0686	0.683	2.323	0.005
MRA_3698	0.682	2.259	0.005
MRA_3483	0.682	2.443	0.005
MRA_3323	0.682	2.124	0.004
MRA_2848	0.682	2.188	0.004
MRA_1847	0.682	2.701	0.005
MRA_0081	0.682	1.945	0.004
MRA_3370	0.681	2.056	0.004
MRA_3310	0.681	2.508	0.005
MRA_3063	0.681	3.583	0.007
MRA_1776	0.681	1.877	0.004
MRA_1574	0.681	1.948	0.004
MRA_1251	0.681	1.992	0.004
MRA_0170	0.681	1.935	0.004
MRA_3884	0.68	1.86	0.004
MRA_3388	0.68	1.86	0.004
MRA_3165	0.68	1.817	0.004
MRA_3116	0.68	2.01	0.004
MRA_2387	0.68	2.044	0.004
MRA_2366	0.68	1.975	0.004
MRA_2138	0.68	2.651	0.005
MRA_2059	0.68	2.733	0.005
MRA_1579	0.68	2.42	0.005
MRA_1515	0.68	1.957	0.004
MRA_3391	0.679	1.935	0.004
MRA_3377	0.679	1.975	0.004
MRA_3119	0.679	2.151	0.004
MRA_2961	0.679	1.886	0.004
MRA_2578	0.679	1.834	0.004
MRA_1229	0.679	1.896	0.004
MRA_1203	0.679	1.929	0.004
MRA_0481	0.679	2.06	0.004
MRA_3946	0.678	1.867	0.004
MRA_3800	0.678	1.849	0.004
MRA_3150	0.678	2.658	0.005
MRA_2887	0.678	2.032	0.004
MRA_1806	0.678	1.962	0.004
MRA_1662	0.678	3.371	0.007
MRA_0824	0.678	2.658	0.005
MRA_0408	0.678	2.312	0.005
MRA_1519	0.677	2.425	0.005
MRA_1309	0.677	1.847	0.004
MRA_1169	0.677	2.01	0.004
MRA_0874	0.677	2.647	0.005
MRA_3319	0.676	2.03	0.004
MRA_2818	0.676	1.84	0.004
MRA_2610	0.676	1.976	0.004
MRA_2475	0.676	2.05	0.004
MRA_2244	0.676	2.245	0.004
MRA_2027	0.676	2.003	0.004
MRA_0643	0.676	1.906	0.004
MRA_0573	0.676	1.983	0.004
MRA_3925	0.675	1.831	0.004
MRA_3730	0.675	2.505	0.005
MRA_3699	0.675	1.968	0.004
MRA_3635	0.675	1.916	0.004
MRA_3422	0.675	1.925	0.004
MRA_2901	0.675	2.534	0.005
MRA_2277	0.675	1.808	0.004
MRA_2174	0.675	2.333	0.005
MRA_2046	0.675	1.919	0.004
MRA_0031	0.675	2.282	0.005
MRA_2611	0.674	3.01	0.006
MRA_2180	0.674	1.836	0.004
MRA_1721	0.674	1.945	0.004
MRA_3727	0.673	1.964	0.004
MRA_2326	0.673	2.249	0.004
MRA_1654	0.673	2.302	0.005
MRA_0952	0.673	1.947	0.004
MRA_0604	0.673	1.932	0.004
MRA_3888	0.672	2.489	0.005
MRA_3294	0.672	2.203	0.004
MRA_3148	0.672	1.814	0.004
MRA_2878	0.672	1.846	0.004
MRA_2558	0.672	2.06	0.004
MRA_1589	0.672	1.929	0.004
MRA_1062	0.672	2.187	0.004
MRA_0705	0.672	1.871	0.004
MRA_0401A	0.672	1.913	0.004
MRA_0114	0.672	2.158	0.004
MRA_3956	0.671	1.92	0.004
MRA_3398	0.671	1.879	0.004
MRA_2545	0.671	2.008	0.004
MRA_0782	0.671	1.795	0.004
MRA_0498	0.671	1.96	0.004
MRA_0343	0.671	1.825	0.004
MRA_3533	0.67	1.988	0.004
MRA_3086	0.67	2.058	0.004
MRA_3022	0.67	1.806	0.004
MRA_2981	0.67	1.964	0.004
MRA_2722	0.67	2.234	0.004
MRA_2590	0.67	1.895	0.004
MRA_1492	0.67	1.764	0.004
MRA_3461	0.669	2.099	0.004
MRA_3446	0.669	2.006	0.004
MRA_0510	0.669	1.984	0.004
MRA_2860	0.668	2.222	0.004
MRA_2608	0.668	2.002	0.004
MRA_1140	0.668	2.126	0.004
MRA_0409	0.668	2.805	0.006
MRA_0333	0.668	1.834	0.004
MRA_3556	0.667	1.921	0.004
MRA_3503	0.667	1.995	0.004
MRA_2234	0.667	1.823	0.004
MRA_2196	0.667	1.867	0.004
MRA_1409	0.667	1.775	0.004
MRA_3653	0.666	1.788	0.004
MRA_3632	0.666	1.979	0.004
MRA_3591	0.666	1.839	0.004
MRA_3193	0.666	1.887	0.004
MRA_3043	0.666	1.837	0.004
MRA_2303	0.666	1.801	0.004
MRA_0599	0.666	1.73	0.003
MRA_0238	0.666	1.77	0.004
MRA_0070	0.666	1.728	0.003
MRA_3799	0.665	1.786	0.004
MRA_3204	0.665	1.961	0.004
MRA_3077	0.665	1.741	0.003
MRA_2899	0.665	2.671	0.005
MRA_0424	0.665	1.788	0.004
MRA_3587	0.664	1.824	0.004
MRA_3354	0.664	2.25	0.004
MRA_2913	0.664	2.174	0.004
MRA_1703	0.664	1.915	0.004
MRA_0595	0.664	2.323	0.005
MRA_3770	0.663	1.744	0.003
MRA_3381	0.663	1.711	0.003
MRA_3256	0.663	2.277	0.005
MRA_2624	0.663	2.145	0.004
MRA_1535	0.663	1.749	0.003
MRA_1210	0.663	1.753	0.004
MRA_0880	0.663	1.708	0.003
MRA_0577	0.663	1.887	0.004
MRA_0147	0.663	1.744	0.003
MRA_3568	0.662	1.812	0.004
MRA_3010	0.662	1.845	0.004
MRA_1727	0.662	1.811	0.004
MRA_1072	0.662	1.853	0.004
MRA_0826	0.662	2.232	0.004
MRA_1849	0.661	1.933	0.004
MRA_1686	0.661	1.816	0.004
MRA_1437	0.661	1.697	0.003
MRA_0800	0.661	1.927	0.004
MRA_0180	0.661	1.708	0.003
MRA_3828	0.66	1.81	0.004
MRA_2884	0.66	2.112	0.004
MRA_2700	0.66	1.711	0.003
MRA_2312	0.66	1.688	0.003
MRA_1719	0.66	1.705	0.003
MRA_1633	0.66	1.942	0.004
MRA_1160	0.66	1.802	0.004
MRA_1050	0.66	1.802	0.004
MRA_3740	0.659	1.671	0.003
MRA_3427	0.659	1.92	0.004
MRA_0605	0.659	1.687	0.003
MRA_0414	0.659	1.77	0.004
MRA_0328	0.659	1.694	0.003
MRA_3538	0.658	1.883	0.004
MRA_2964	0.658	2.163	0.004
MRA_2963	0.658	2.131	0.004
MRA_0588	0.658	1.868	0.004
MRA_0007	0.658	2.041	0.004
MRA_3579	0.657	1.718	0.003
MRA_2854	0.657	2.028	0.004
MRA_2198	0.657	1.81	0.004
MRA_2031	0.657	1.903	0.004
MRA_1981	0.657	1.677	0.003
MRA_1797	0.657	2.424	0.005
MRA_1015	0.657	1.745	0.003
MRA_3404	0.656	1.765	0.004
MRA_3176	0.656	1.843	0.004
MRA_2629A	0.656	1.738	0.003
MRA_2351	0.656	2.008	0.004
MRA_2256	0.656	1.788	0.004
MRA_2132	0.656	1.733	0.003
MRA_2099	0.656	1.998	0.004
MRA_1944	0.656	1.797	0.004
MRA_1003	0.656	1.95	0.004
MRA_3599	0.655	1.766	0.004
MRA_3309	0.655	1.679	0.003
MRA_3084	0.655	7.295	0.015
MRA_2813	0.655	1.859	0.004
MRA_1818	0.655	1.897	0.004
MRA_2866	0.654	2.376	0.005
MRA_2292	0.654	2.49	0.005
MRA_0813	0.654	1.71	0.003
MRA_0672	0.654	1.914	0.004
MRA_0043	0.654	1.977	0.004
MRA_3720	0.653	1.831	0.004
MRA_2454	0.653	1.925	0.004
MRA_2158	0.653	2.998	0.006
MRA_3718	0.652	1.737	0.003
MRA_3260	0.652	1.748	0.003
MRA_2469	0.652	2.42	0.005
MRA_2432	0.652	2.073	0.004
MRA_1052	0.652	1.641	0.003
MRA_0459	0.652	1.907	0.004
MRA_0200	0.652	1.719	0.003
MRA_3650	0.651	1.655	0.003
MRA_2266	0.651	1.638	0.003
MRA_0391	0.651	2.219	0.004
MRA_0242	0.651	1.891	0.004
MRA_3834	0.65	1.758	0.004
MRA_3707	0.65	1.998	0.004
MRA_3074	0.65	1.658	0.003
MRA_0624	0.65	1.951	0.004
MRA_1930	0.649	1.792	0.004
MRA_0848	0.649	1.723	0.003
MRA_0340	0.649	1.667	0.003
MRA_0217	0.649	1.873	0.004
MRA_3387	0.648	2.644	0.005
MRA_2967	0.648	1.676	0.003
MRA_2055	0.648	2.171	0.004
MRA_1444	0.648	1.715	0.003
MRA_1368	0.648	1.876	0.004
MRA_0664	0.648	1.685	0.003
MRA_0609	0.648	1.752	0.004
MRA_3744	0.647	1.605	0.003
MRA_3301	0.647	2.184	0.004
MRA_2950	0.647	1.657	0.003
MRA_1850	0.647	1.988	0.004
MRA_1768C	0.647	1.6	0.003
MRA_1221	0.647	1.597	0.003
MRA_0385	0.647	1.682	0.003
MRA_3739	0.646	1.669	0.003
MRA_3541	0.646	2.694	0.005
MRA_3415	0.646	1.664	0.003
MRA_2564	0.646	1.982	0.004
MRA_0854	0.646	1.796	0.004
MRA_0673	0.646	1.697	0.003
MRA_0503	0.646	1.751	0.004
MRA_0494	0.646	1.623	0.003
MRA_0279	0.646	1.623	0.003
MRA_3409	0.645	1.928	0.004
MRA_3108	0.645	1.638	0.003
MRA_2641	0.645	1.728	0.003
MRA_2275	0.645	1.916	0.004
MRA_2270	0.645	1.94	0.004
MRA_2184	0.645	2.326	0.005
MRA_2140A	0.645	2.676	0.005
MRA_1528	0.645	1.94	0.004
MRA_0259	0.645	1.777	0.004
MRA_3449	0.644	1.626	0.003
MRA_2317	0.644	1.784	0.004
MRA_0646	0.644	1.736	0.003
MRA_0202	0.644	1.844	0.004
MRA_2232	0.643	1.608	0.003
MRA_3795	0.642	1.81	0.004
MRA_2973	0.642	1.586	0.003
MRA_1527	0.642	1.688	0.003
MRA_1020	0.642	1.643	0.003
MRA_0753	0.642	1.702	0.003
MRA_0660	0.642	1.876	0.004
MRA_0540	0.642	1.63	0.003
MRA_1359	0.641	2.061	0.004
MRA_0745	0.641	1.946	0.004
MRA_0465	0.641	1.822	0.004
MRA_3813	0.64	1.791	0.004
MRA_1753	0.64	1.731	0.003
MRA_1650	0.64	1.604	0.003
MRA_0500	0.64	1.702	0.003
MRA_0226	0.64	2.05	0.004
MRA_0099	0.64	2.192	0.004
MRA_3917	0.639	1.619	0.003
MRA_3658	0.639	1.819	0.004
MRA_3592	0.639	1.697	0.003
MRA_2648	0.639	2.385	0.005
MRA_2630	0.639	1.732	0.003
MRA_1866	0.639	1.629	0.003
MRA_1398	0.639	1.841	0.004
MRA_1228	0.639	1.879	0.004
MRA_0885	0.639	2.004	0.004
MRA_0036	0.639	1.741	0.003
MRA_3417	0.638	1.612	0.003
MRA_3157	0.638	1.591	0.003
MRA_2708	0.638	1.736	0.003
MRA_2163	0.638	1.738	0.003
MRA_1122	0.638	2.41	0.005
MRA_0661	0.638	2.458	0.005
MRA_3302	0.637	1.647	0.003
MRA_3252	0.637	1.68	0.003
MRA_0795	0.637	1.548	0.003
MRA_2206	0.636	1.821	0.004
MRA_1484	0.636	1.676	0.003
MRA_0788	0.636	2.256	0.005
MRA_0679	0.636	1.59	0.003
MRA_3823	0.635	2.554	0.005
MRA_3645	0.635	1.649	0.003
MRA_2740	0.635	1.578	0.003
MRA_0655	0.635	1.589	0.003
MRA_3838	0.634	1.742	0.003
MRA_2054	0.634	1.746	0.003
MRA_1367	0.634	1.629	0.003
MRA_1321	0.634	1.742	0.003
MRA_0719	0.634	1.669	0.003
MRA_0145	0.634	2.152	0.004
MRA_0009	0.634	1.555	0.003
MRA_3458	0.633	1.72	0.003
MRA_2747	0.633	1.823	0.004
MRA_2242	0.633	1.9	0.004
MRA_3546	0.632	1.53	0.003
MRA_3080	0.632	4.884	0.01
MRA_2392A	0.632	1.892	0.004
MRA_1414	0.632	1.557	0.003
MRA_0973	0.632	2.039	0.004
MRA_3874	0.631	1.56	0.003
MRA_2597	0.631	1.534	0.003
MRA_0964	0.631	1.581	0.003
MRA_0864	0.631	1.918	0.004
MRA_0511	0.631	1.62	0.003
MRA_0106	0.631	1.557	0.003
MRA_3781	0.63	2.214	0.004
MRA_2397	0.63	1.512	0.003
MRA_1794	0.63	1.6	0.003
MRA_1711	0.63	1.663	0.003
MRA_1493	0.63	1.657	0.003
MRA_1271	0.63	1.612	0.003
MRA_0406	0.63	1.596	0.003
MRA_1768D	0.629	1.912	0.004
MRA_0014	0.629	1.885	0.004
MRA_3762	0.628	1.66	0.003
MRA_3714	0.628	1.626	0.003
MRA_3689	0.628	3.081	0.006
MRA_2715	0.628	2.086	0.004
MRA_2458	0.628	1.78	0.004
MRA_0479	0.628	1.84	0.004
MRA_2916	0.627	1.613	0.003
MRA_2910	0.627	1.654	0.003
MRA_2618	0.627	1.512	0.003
MRA_1195	0.627	1.552	0.003
MRA_3916	0.626	1.831	0.004
MRA_3672	0.626	1.721	0.003
MRA_3498	0.626	1.502	0.003
MRA_3440	0.626	1.495	0.003
MRA_3132	0.626	1.808	0.004
MRA_1967	0.626	1.549	0.003
MRA_1641	0.626	1.661	0.003
MRA_0911	0.626	1.586	0.003
MRA_0506	0.626	1.53	0.003
MRA_3500	0.625	1.883	0.004
MRA_3201	0.625	1.568	0.003
MRA_3067	0.625	1.5	0.003
MRA_2498	0.625	1.624	0.003
MRA_2422	0.625	1.688	0.003
MRA_3433	0.624	1.501	0.003
MRA_1962	0.624	1.693	0.003
MRA_1690	0.624	1.478	0.003
MRA_1541	0.624	1.529	0.003
MRA_1329	0.624	1.661	0.003
MRA_0995	0.624	0.394	0.001
MRA_0339	0.624	1.497	0.003
MRA_0069	0.624	1.67	0.003
MRA_2857	0.623	1.752	0.004
MRA_2328	0.623	1.673	0.003
MRA_1658	0.623	1.543	0.003
MRA_0433	0.623	1.524	0.003
MRA_0254	0.623	1.515	0.003
MRA_3402	0.622	1.575	0.003
MRA_2744	0.622	1.524	0.003
MRA_2294	0.622	1.52	0.003
MRA_1506	0.622	1.521	0.003
MRA_1472	0.622	1.504	0.003
MRA_1467	0.622	1.515	0.003
MRA_1086	0.622	1.463	0.003
MRA_0298	0.622	1.585	0.003
MRA_3610	0.621	1.497	0.003
MRA_3374	0.621	1.767	0.004
MRA_3244	0.621	2.042	0.004
MRA_2927	0.621	1.479	0.003
MRA_2552	0.621	1.481	0.003
MRA_2335	0.621	1.662	0.003
MRA_2144	0.621	1.515	0.003
MRA_2036	0.621	1.581	0.003
MRA_1990	0.621	1.798	0.004
MRA_1564	0.621	1.456	0.003
MRA_1462	0.621	1.532	0.003
MRA_1139	0.621	1.702	0.003
MRA_0978	0.621	1.47	0.003
MRA_0473	0.621	1.488	0.003
MRA_3854	0.62	1.949	0.004
MRA_2780	0.62	1.662	0.003
MRA_1821	0.62	2.289	0.005
MRA_1613	0.62	1.524	0.003
MRA_1174	0.62	1.655	0.003
MRA_0950	0.62	1.618	0.003
MRA_3486	0.619	1.628	0.003
MRA_2417	0.619	1.731	0.003
MRA_2103	0.619	1.951	0.004
MRA_0792	0.619	1.633	0.003
MRA_0454	0.619	1.479	0.003
MRA_0320	0.619	1.525	0.003
MRA_0059	0.619	1.708	0.003
MRA_3877	0.618	1.633	0.003
MRA_3595	0.618	1.443	0.003
MRA_1201	0.618	1.515	0.003
MRA_0981	0.618	1.466	0.003
MRA_1935	0.617	2.083	0.004
MRA_1301	0.617	1.468	0.003
MRA_1080	0.617	1.644	0.003
MRA_0833	0.617	1.45	0.003
MRA_0490	0.617	1.484	0.003
MRA_0101	0.617	1.485	0.003
MRA_3631	0.616	1.571	0.003
MRA_2543	0.616	1.528	0.003
MRA_2217	0.616	1.518	0.003
MRA_1580	0.616	1.442	0.003
MRA_1002	0.616	1.445	0.003
MRA_0464	0.616	1.468	0.003
MRA_0133	0.616	1.467	0.003
MRA_0024	0.616	1.577	0.003
MRA_3378	0.615	1.466	0.003
MRA_3334	0.615	1.425	0.003
MRA_1577	0.615	1.797	0.004
MRA_1351	0.615	1.847	0.004
MRA_1236	0.615	1.544	0.003
MRA_1188	0.615	1.468	0.003
MRA_0990	0.615	2.288	0.005
MRA_0247	0.615	1.522	0.003
MRA_3766	0.614	2.391	0.005
MRA_3450	0.614	1.473	0.003
MRA_3355	0.614	1.425	0.003
MRA_3170	0.614	1.436	0.003
MRA_3075	0.614	2.017	0.004
MRA_2697	0.614	1.682	0.003
MRA_2461	0.614	1.69	0.003
MRA_2359	0.614	2.238	0.004
MRA_0891	0.614	1.514	0.003
MRA_2517	0.613	1.496	0.003
MRA_2082	0.613	1.433	0.003
MRA_1625	0.613	2.678	0.005
MRA_0993	0.613	1.476	0.003
MRA_0410	0.613	1.457	0.003
MRA_3867	0.612	1.516	0.003
MRA_3613	0.612	1.488	0.003
MRA_2013	0.612	1.883	0.004
MRA_1614	0.612	1.427	0.003
MRA_0850	0.612	1.827	0.004
MRA_0368	0.612	1.538	0.003
MRA_3396	0.611	1.417	0.003
MRA_2810	0.611	1.516	0.003
MRA_1607	0.611	1.458	0.003
MRA_1163	0.611	1.605	0.003
MRA_3817	0.61	1.411	0.003
MRA_3798	0.61	1.919	0.004
MRA_3537	0.61	1.5	0.003
MRA_3497	0.61	1.998	0.004
MRA_1336	0.61	1.484	0.003
MRA_1089	0.61	1.434	0.003
MRA_0785	0.61	1.429	0.003
MRA_0764	0.61	2.429	0.005
MRA_0116	0.61	2.436	0.005
MRA_3530	0.609	1.507	0.003
MRA_3350	0.609	1.43	0.003
MRA_3333	0.609	1.492	0.003
MRA_2069	0.609	1.577	0.003
MRA_1947	0.609	1.399	0.003
MRA_1494	0.609	1.454	0.003
MRA_0915	0.609	1.752	0.004
MRA_1334	0.608	1.522	0.003
MRA_1068	0.608	1.447	0.003
MRA_0809	0.608	1.41	0.003
MRA_0535	0.608	1.78	0.004
MRA_0295	0.608	2.268	0.005
MRA_0174	0.608	1.571	0.003
MRA_0144	0.608	1.435	0.003
MRA_3687	0.607	1.613	0.003
MRA_2533	0.607	2.001	0.004
MRA_2487	0.607	1.417	0.003
MRA_2150	0.607	2.619	0.005
MRA_3882	0.606	1.429	0.003
MRA_2714	0.606	1.849	0.004
MRA_2096	0.606	1.915	0.004
MRA_0801	0.606	1.439	0.003
MRA_0056	0.606	1.535	0.003
MRA_0016	0.606	1.538	0.003
MRA_3963	0.605	1.833	0.004
MRA_3609	0.605	1.486	0.003
MRA_3251	0.605	1.569	0.003
MRA_1876	0.605	1.508	0.003
MRA_1281	0.605	1.591	0.003
MRA_0393	0.605	1.46	0.003
MRA_0234	0.605	2.041	0.004
MRA_0189	0.605	1.421	0.003
MRA_3793	0.604	1.589	0.003
MRA_3253	0.604	1.6	0.003
MRA_2127	0.604	1.488	0.003
MRA_2093	0.604	1.507	0.003
MRA_1119	0.604	1.644	0.003
MRA_0839	0.604	1.403	0.003
MRA_0118	0.604	1.399	0.003
MRA_0053	0.604	1.445	0.003
MRA_0001	0.604	1.458	0.003
MRA_3862	0.603	1.397	0.003
MRA_3749	0.603	1.466	0.003
MRA_2471	0.603	1.525	0.003
MRA_1691	0.603	1.378	0.003
MRA_1558	0.603	1.457	0.003
MRA_1422	0.603	1.39	0.003
MRA_0914	0.603	1.429	0.003
MRA_0567	0.603	1.386	0.003
MRA_3264	0.602	1.43	0.003
MRA_2195	0.602	1.512	0.003
MRA_1383	0.602	1.433	0.003
MRA_3614	0.601	1.443	0.003
MRA_3338	0.601	1.433	0.003
MRA_2890	0.601	1.634	0.003
MRA_2337	0.601	1.707	0.003
MRA_1854	0.601	1.504	0.003
MRA_1622	0.601	1.452	0.003
MRA_3759	0.6	1.358	0.003
MRA_3746	0.6	1.407	0.003
MRA_2649	0.6	1.591	0.003
MRA_2386	0.6	1.39	0.003
MRA_1637	0.6	1.389	0.003
MRA_1192	0.6	1.373	0.003
MRA_1162	0.6	1.403	0.003
MRA_0415	0.6	1.431	0.003
MRA_2882	0.599	1.558	0.003
MRA_2633	0.599	1.445	0.003
MRA_2236	0.599	1.623	0.003
MRA_2178	0.599	2.179	0.004
MRA_1874	0.599	2.058	0.004
MRA_1598A	0.599	1.562	0.003
MRA_1339	0.599	1.464	0.003
MRA_0771	0.599	1.378	0.003
MRA_3371	0.598	1.424	0.003
MRA_3072	0.598	1.477	0.003
MRA_2496	0.598	1.572	0.003
MRA_2032	0.598	1.548	0.003
MRA_1862	0.598	1.387	0.003
MRA_0996	0.598	0.499	0.001
MRA_0819	0.598	1.457	0.003
MRA_0721	0.598	1.865	0.004
MRA_0119	0.598	1.456	0.003
MRA_0002	0.598	1.367	0.003
MRA_3228	0.597	1.401	0.003
MRA_3144	0.597	1.462	0.003
MRA_2007	0.597	1.396	0.003
MRA_1513	0.597	1.463	0.003
MRA_1144	0.597	2.506	0.005
MRA_1106	0.597	1.378	0.003
MRA_0735	0.597	1.474	0.003
MRA_0489	0.597	1.347	0.003
MRA_0286	0.597	1.482	0.003
MRA_0272	0.597	1.674	0.003
[truncated: 2,032 more rows]

## Sheet: MmaR-Signal P
SignalP-5.0 Prediction for M. marinum Secreted Proteins
# SignalP-5.0	Organism: gram+	Timestamp: 20220701033246
# ID	Prediction	SP(Sec/SPI)	TAT(Tat/SPI)	LIPO(Sec/SPII)	OTHER	CS Position
MMAR_5289	OTHER	0.03485	0.003707	0.005127	0.956316
MMAR_5287	OTHER	0.025091	0.006781	0.009855	0.958273
MMAR_5288	OTHER	0.161906	0.135006	0.016345	0.686744
MMAR_5285	OTHER	0.01405	0.000594	0.001206	0.984151
MMAR_5286	TAT(Tat/SPI)	0.071627	0.588698	0.004779	0.334895	CS pos: 43-44. AGA-DE. Pr: 0.5777
MMAR_5283	OTHER	0.020617	0.001338	0.003891	0.974154
MMAR_5284	OTHER	0.004411	0.000187	0.000285	0.995116
MMAR_5281	OTHER	0.042232	0.054783	0.003168	0.899817
MMAR_5282	OTHER	0.00251	0.000449	0.000428	0.996613
MMAR_5280	OTHER	0.027945	0.002103	0.007839	0.962113
MMAR_5298	OTHER	0.089616	0.052941	0.01382	0.843623
MMAR_5299	OTHER	0.055766	0.014798	0.023186	0.90625
MMAR_5296	OTHER	0.005557	0.001022	0.000713	0.992708
MMAR_5297	SP(Sec/SPI)	0.705003	0.052125	0.020641	0.222231	CS pos: 23-24. ATA-AA. Pr: 0.3170
MMAR_5294	OTHER	0.118186	0.349192	0.011014	0.521608
MMAR_5295	OTHER	0.04354	0.038398	0.008984	0.909079
MMAR_5292	OTHER	0.00934	0.014384	0.001228	0.975048
MMAR_5293	OTHER	0.017911	0.000572	0.006356	0.975161
MMAR_5290	OTHER	0.005514	0.001439	0.000349	0.992698
MMAR_5291	OTHER	0.149979	0.035547	0.047931	0.766543
MMAR_5269	SP(Sec/SPI)	0.885031	0.044535	0.048619	0.021815	CS pos: 31-32. VLA-AP. Pr: 0.5934
MMAR_5267	OTHER	0.039551	0.001901	0.007612	0.950936
MMAR_5268	OTHER	0.004408	0.003774	0.000581	0.991237
MMAR_5265	OTHER	0.008848	0.001161	0.001584	0.988407
MMAR_5266	OTHER	0.054645	0.010762	0.004614	0.92998
MMAR_5263	OTHER	0.007021	0.002145	0.000696	0.990137
MMAR_5261	OTHER	0.053546	0.004674	0.01917	0.92261
MMAR_5262	SP(Sec/SPI)	0.815455	0.158946	0.012687	0.012912	CS pos: 51-52. APA-AA. Pr: 0.2579
MMAR_5260	OTHER	0.013374	0.001178	0.000916	0.984532
MMAR_5278	OTHER	0.00606	0.002091	0.001522	0.990327
MMAR_5279	OTHER	0.050182	0.04059	0.00939	0.899837
MMAR_5276	OTHER	0.009715	0.002019	0.000743	0.987524
MMAR_5277	OTHER	0.135064	0.076828	0.012819	0.775289
MMAR_5274	OTHER	0.010873	0.000534	0.000806	0.987788
MMAR_5275	OTHER	0.017742	0.000838	0.014743	0.966676
MMAR_5272	OTHER	0.124768	0.085735	0.025974	0.763523
MMAR_5273	OTHER	0.016717	0.004233	0.001753	0.977298
MMAR_5270	OTHER	0.192482	0.02999	0.007583	0.769945
MMAR_5271	OTHER	0.006116	0.000721	0.001166	0.991996
MMAR_5249	OTHER	0.025646	0.003264	0.002779	0.968311
MMAR_5247	OTHER	0.079215	0.118441	0.002337	0.800007
MMAR_5248	OTHER	0.01027	0.004607	0.006467	0.978656
MMAR_5245	OTHER	0.004739	0.002534	0.000949	0.991777
MMAR_5246	OTHER	0.009239	0.001599	0.00159	0.987572
MMAR_5243	OTHER	0.052302	0.004324	0.000982	0.942391
MMAR_5244	LIPO(Sec/SPII)	0.035409	0.006253	0.957315	0.001022	CS pos: 25-26. LVG-CS. Pr: 0.7339
MMAR_5241	OTHER	0.005867	0.00127	0.00118	0.991683
MMAR_5242	OTHER	0.051406	0.003459	0.022931	0.922203
MMAR_5240	OTHER	0.04247	0.004286	0.002643	0.950601
MMAR_5258	SP(Sec/SPI)	0.594055	0.33502	0.024061	0.046863	CS pos: 31-32. AVA-AP. Pr: 0.2703
MMAR_5259	OTHER	0.200415	0.039163	0.01945	0.740973
MMAR_5256	OTHER	0.02484	0.00307	0.012972	0.959118
MMAR_5257	OTHER	0.043469	0.005261	0.006284	0.944986
MMAR_5254	OTHER	0.006961	0.0011	0.002062	0.989878
MMAR_5255	OTHER	0.031715	0.008123	0.013902	0.946259
MMAR_5252	OTHER	0.334393	0.061067	0.024511	0.580029
MMAR_5253	OTHER	0.010873	0.001267	0.004771	0.983089
MMAR_5250	OTHER	0.051831	0.009804	0.0335	0.904865
MMAR_5251	TAT(Tat/SPI)	0.467285	0.51645	0.007792	0.008473	CS pos: 33-34. AAA-EP. Pr: 0.8164
MMAR_5229	OTHER	0.235612	0.211663	0.038022	0.514703
MMAR_5227	OTHER	0.016509	0.006114	0.004912	0.972464
MMAR_5228	OTHER	0.028603	0.003663	0.003349	0.964385
MMAR_5225	OTHER	0.035495	0.040223	0.019023	0.90526
MMAR_5226	OTHER	0.010387	0.037087	0.001466	0.951059
MMAR_2196	OTHER	0.001928	0.00012	0.000373	0.997579
MMAR_5223	OTHER	0.042163	0.048636	0.036134	0.873066
MMAR_2197	OTHER	0.043168	0.004109	0.00638	0.946343
MMAR_5224	SP(Sec/SPI)	0.530518	0.064554	0.134517	0.270411	CS pos: 36-37. ANG-IQ. Pr: 0.3233
MMAR_2198	OTHER	0.094049	0.026523	0.013405	0.866023
MMAR_5221	OTHER	0.036541	0.00902	0.013455	0.940984
MMAR_2199	OTHER	0.045711	0.011552	0.040311	0.902426
MMAR_5222	OTHER	0.005939	0.000526	0.000907	0.992628
MMAR_2192	OTHER	0.007167	0.001347	0.002206	0.98928
MMAR_2193	OTHER	0.12294	0.002194	0.001461	0.873406
MMAR_5220	SP(Sec/SPI)	0.834472	0.003396	0.160588	0.001544	CS pos: 28-29. AHA-DP. Pr: 0.8054
MMAR_2194	OTHER	0.007107	0.001722	0.001272	0.989899
MMAR_2195	OTHER	0.003088	0.001436	0.001249	0.994228
MMAR_2190	OTHER	0.026597	0.031106	0.006511	0.935786
MMAR_2191	OTHER	0.016243	0.035303	0.004524	0.943929
MMAR_5238	OTHER	0.113141	0.014568	0.105442	0.766849
MMAR_5239	OTHER	0.002063	0.000162	0.003566	0.994209
MMAR_5236	OTHER	0.093942	0.029009	0.011241	0.865809
MMAR_5237	OTHER	0.023715	0.001232	0.029014	0.946038
MMAR_5234	OTHER	0.139739	0.019897	0.013862	0.826502
MMAR_5235	OTHER	0.174283	0.07318	0.063158	0.689378
MMAR_5232	OTHER	0.00897	0.00337	0.001153	0.986507
MMAR_5233	SP(Sec/SPI)	0.925301	0.023198	0.019237	0.032264	CS pos: 19-20. AAA-AP. Pr: 0.6021
MMAR_5230	OTHER	0.003749	0.000307	0.000698	0.995246
MMAR_5231	OTHER	0.006903	0.001776	0.000825	0.990496
MMAR_5209	OTHER	0.016554	0.001684	0.003087	0.978675
MMAR_5207	OTHER	0.051465	0.012428	0.00641	0.929698
MMAR_5208	OTHER	0.002701	0.000243	0.000525	0.996531
MMAR_2178	OTHER	0.005533	0.000538	0.00095	0.992979
MMAR_5205	OTHER	0.004015	9.5e-05	0.001952	0.993938
MMAR_2179	OTHER	0.01211	0.000993	0.007458	0.979439
MMAR_5206	OTHER	0.021391	0.019614	0.007652	0.951343
MMAR_5203	SP(Sec/SPI)	0.633753	0.093181	0.018389	0.254677	CS pos: 46-47. ALA-AS. Pr: 0.5157
MMAR_5204	OTHER	0.003642	0.001507	0.000534	0.994316
MMAR_2174	OTHER	0.07103	0.008169	0.026225	0.894576
MMAR_5201	SP(Sec/SPI)	0.442939	0.035958	0.114111	0.406992	CS pos: 44-45. RPG-GT. Pr: 0.0376
MMAR_2175	OTHER	0.021309	0.004747	0.004025	0.969919
MMAR_5202	OTHER	0.024722	0.005978	0.002692	0.966608
MMAR_2176	OTHER	0.040379	0.023761	0.00262	0.93324
MMAR_2177	OTHER	0.002337	0.000176	0.000294	0.997194
MMAR_5200	OTHER	0.016286	0.000325	0.012005	0.971384
MMAR_2170	OTHER	0.007771	0.01924	0.000959	0.97203
MMAR_2171	OTHER	0.017371	0.010995	0.004638	0.966996
MMAR_2172	OTHER	0.012648	0.001143	0.013797	0.972411
MMAR_2173	OTHER	0.06566	0.017667	0.006934	0.90974
MMAR_5218	OTHER	0.013821	0.002502	0.011413	0.972263
MMAR_5219	OTHER	0.002565	0.000621	0.006437	0.990377
MMAR_2189	OTHER	0.020196	0.002197	0.002547	0.97506
MMAR_5216	SP(Sec/SPI)	0.948293	0.049177	0.001585	0.000945	CS pos: 31-32. ALA-NP. Pr: 0.9553
MMAR_5217	OTHER	0.003662	0.000906	0.000368	0.995065
MMAR_5214	OTHER	0.003345	0.000678	0.000405	0.995571
MMAR_5215	OTHER	0.131704	0.022628	0.011838	0.833831
MMAR_2185	OTHER	0.127635	0.013501	0.025313	0.833551
MMAR_5212	OTHER	0.00305	0.000734	0.000855	0.99536
MMAR_2186	OTHER	0.002279	0.001113	0.001185	0.995423
MMAR_5213	OTHER	0.066034	0.02555	0.004248	0.904168
MMAR_2187	OTHER	0.014352	0.003453	0.001179	0.981016
MMAR_5210	OTHER	0.014084	0.000792	0.000892	0.984232
MMAR_2188	LIPO(Sec/SPII)	0.02612	0.015242	0.940871	0.017767	CS pos: 43-44. MTG-CG. Pr: 0.9366
MMAR_5211	OTHER	0.026374	0.041555	0.077711	0.854359
MMAR_2181	OTHER	0.004179	0.000386	0.000556	0.994879
MMAR_2182	OTHER	0.012611	0.0015	0.002289	0.9836
MMAR_2183	OTHER	0.025058	0.004071	0.067314	0.903557
MMAR_2184	OTHER	0.273788	0.032172	0.009829	0.684212
MMAR_2180	OTHER	0.031914	0.037167	0.002519	0.9284
MMAR_2156	OTHER	0.006293	0.001061	0.000734	0.991913
MMAR_3488	OTHER	0.065558	0.002345	0.002105	0.929992
MMAR_2157	OTHER	0.01371	0.00247	0.004757	0.979063
MMAR_3487	OTHER	0.007062	0.002365	0.000648	0.989925
MMAR_2158	OTHER	0.003502	0.002499	0.002068	0.991932
MMAR_2159	OTHER	0.01325	0.007068	0.00129	0.978392
MMAR_3489	OTHER	0.00317	0.000809	0.000484	0.995537
MMAR_2152	OTHER	0.02383	0.040557	0.001423	0.93419
MMAR_3484	OTHER	0.012165	0.009803	0.001768	0.976264
MMAR_2153	OTHER	0.012758	0.024796	0.002382	0.960064
MMAR_3483	OTHER	0.010244	0.005598	0.004069	0.980089
MMAR_2154	OTHER	0.02199	0.015199	0.002222	0.960589
MMAR_3486	OTHER	0.01117	0.000515	0.003733	0.984582
MMAR_2155	OTHER	0.126449	0.016567	0.026436	0.830548
MMAR_3485	SP(Sec/SPI)	0.978229	0.016918	0.003583	0.00127	CS pos: 31-32. ANA-GA. Pr: 0.5119
MMAR_3480	OTHER	0.003456	0.000497	0.000356	0.995691
MMAR_2150	SP(Sec/SPI)	0.766913	0.035735	0.006811	0.190541	CS pos: 25-26. ALA-DE. Pr: 0.7801
MMAR_3482	OTHER	0.041951	0.001207	0.013711	0.943131
MMAR_2151	SP(Sec/SPI)	0.603395	0.379653	0.000944	0.016008	CS pos: 51-52. AHA-DP. Pr: 0.8765
MMAR_3481	OTHER	0.013405	0.002644	0.002455	0.981496
MMAR_2167	OTHER	0.007186	0.001782	0.000545	0.990487
MMAR_3499	OTHER	0.03676	0.00609	0.00545	0.9517
MMAR_2168	OTHER	0.016093	0.002928	0.002481	0.978498
MMAR_3498	OTHER	0.029865	0.001099	0.083113	0.885923
MMAR_2169	OTHER	0.073221	0.014591	0.001928	0.91026
MMAR_2163	OTHER	0.075599	0.008368	0.028399	0.887633
MMAR_3495	OTHER	0.047775	0.069094	0.002914	0.880218
MMAR_2164	OTHER	0.030512	0.002114	0.002314	0.96506
MMAR_3494	OTHER	0.062826	0.027928	0.009484	0.899762
MMAR_2165	OTHER	0.009996	0.000967	0.000961	0.988075
MMAR_3497	OTHER	0.007398	0.000792	0.001216	0.990594
MMAR_2166	OTHER	0.204736	0.174714	0.162459	0.458091
MMAR_3496	OTHER	0.022073	0.008177	0.00334	0.96641
MMAR_3491	OTHER	0.003511	0.000608	0.000278	0.995603
MMAR_2160	OTHER	0.037074	0.00738	0.009019	0.946527
MMAR_3490	OTHER	0.017069	0.000478	0.000807	0.981646
MMAR_2161	OTHER	0.006151	0.001606	0.001061	0.991182
MMAR_3493	OTHER	0.004282	0.000445	0.002608	0.992665
MMAR_2162	OTHER	0.025245	0.002929	0.006506	0.96532
MMAR_3492	OTHER	0.120695	0.002323	0.003346	0.873636
MMAR_2138	OTHER	0.027656	0.002432	0.005384	0.964527
MMAR_2139	OTHER	0.012534	0.005697	0.001168	0.980601
MMAR_2134	OTHER	0.007999	0.001573	0.001362	0.989067
MMAR_3466	OTHER	0.109342	0.087337	0.007387	0.795934
MMAR_4797	OTHER	0.004941	0.00014	0.000558	0.994361
MMAR_3465	OTHER	0.033214	0.011188	0.00461	0.950988
MMAR_4796	OTHER	0.005907	0.000267	0.000634	0.993191
MMAR_2136	OTHER	0.049184	0.036145	0.029389	0.885283
MMAR_3468	OTHER	0.014219	0.03391	0.006812	0.945059
MMAR_4799	OTHER	0.032579	0.051304	0.014362	0.901755
MMAR_2137	OTHER	0.075945	0.021669	0.026768	0.875618
MMAR_3467	OTHER	0.044291	0.054086	0.002221	0.899403
MMAR_4798	OTHER	0.042519	0.007608	0.016213	0.93366
MMAR_2130	OTHER	0.073849	0.015572	0.006238	0.904341
MMAR_4793	OTHER	0.017879	0.017846	0.00823	0.956045
MMAR_2131	OTHER	0.044546	0.004359	0.00198	0.949115
MMAR_3461	OTHER	0.015561	0.013218	0.00407	0.967151
MMAR_4792	OTHER	0.004261	0.000712	0.000644	0.994383
MMAR_2132	OTHER	0.035708	0.002596	0.001849	0.959847
MMAR_3464	OTHER	0.022203	0.00487	0.005709	0.967218
MMAR_4795	OTHER	0.17993	0.012402	0.014941	0.792728
MMAR_2133	OTHER	0.033494	0.009469	0.005353	0.951684
MMAR_4794	OTHER	0.019041	0.013782	0.002054	0.965123
MMAR_4791	OTHER	0.005847	0.001093	0.001015	0.992045
MMAR_4790	OTHER	0.00933	0.002468	0.000633	0.987569
MMAR_2149	TAT(Tat/SPI)	0.001204	0.99515	0.000924	0.002723	CS pos: 43-44. ALL-RP. Pr: 0.1335
MMAR_2145	OTHER	0.009383	0.000578	0.002059	0.98798
MMAR_3477	OTHER	0.053933	0.013797	0.011367	0.920903
MMAR_2146	OTHER	0.228431	0.14144	0.018665	0.611464
MMAR_3476	OTHER	0.017719	0.002636	0.004526	0.975119
MMAR_2147	OTHER	0.014741	0.00365	0.003745	0.977864
MMAR_3479	OTHER	0.002678	0.004189	0.000379	0.992753
MMAR_2148	OTHER	0.026928	0.003153	0.001962	0.967957
MMAR_3478	OTHER	0.030539	0.011548	0.00593	0.951984
MMAR_2141	OTHER	0.087359	0.029036	0.036482	0.847123
MMAR_3473	OTHER	0.059604	0.009089	0.053486	0.877821
MMAR_2142	OTHER	0.209402	0.034445	0.025121	0.731033
MMAR_3472	OTHER	0.01758	0.001898	0.002411	0.978111
MMAR_2143	OTHER	0.021965	0.003775	0.028282	0.945978
MMAR_3475	OTHER	0.010296	0.00262	0.001546	0.985538
MMAR_2144	OTHER	0.082045	0.014438	0.024618	0.878899
MMAR_3474	OTHER	0.003153	0.000511	0.000905	0.995432
MMAR_3471	OTHER	0.007583	0.006569	0.000887	0.984962
MMAR_2140	OTHER	0.064824	0.095665	0.019842	0.819669
MMAR_3470	OTHER	0.14697	0.293532	0.090248	0.469249
MMAR_2116	OTHER	0.087203	0.102947	0.01687	0.79298
MMAR_3448	LIPO(Sec/SPII)	0.033882	0.003273	0.962018	0.000827	CS pos: 29-30. VAA-CS. Pr: 0.9626
MMAR_4779	OTHER	0.183581	0.205488	0.048015	0.562916
MMAR_2117	OTHER	0.011456	0.016553	0.003302	0.968689
MMAR_3447	OTHER	0.00549	0.000648	0.000447	0.993416
MMAR_4778	OTHER	0.011109	0.005341	0.0011	0.982451
MMAR_2118	OTHER	0.067163	0.326457	0.002138	0.604242
MMAR_2119	OTHER	0.207024	0.05785	0.051487	0.683639
MMAR_3449	OTHER	0.023597	0.007736	0.003821	0.964846
MMAR_2112	OTHER	0.341796	0.118795	0.01772	0.52169
MMAR_3444	OTHER	0.044773	0.057513	0.00479	0.892924
MMAR_4775	OTHER	0.161151	0.257289	0.040246	0.541314
MMAR_2113	OTHER	0.342254	0.16587	0.02115	0.470726
MMAR_3443	OTHER	0.046101	0.070808	0.004933	0.878158
MMAR_4774	OTHER	0.006654	0.000267	0.000895	0.992185
MMAR_2114	OTHER	0.183474	0.008596	0.010728	0.797202
MMAR_3446	LIPO(Sec/SPII)	0.002839	0.003732	0.992891	0.000538	CS pos: 28-29. LTG-CV. Pr: 0.9932
MMAR_4777	OTHER	0.06793	0.116667	0.008275	0.807128
MMAR_2115	OTHER	0.085999	0.013756	0.028165	0.872081
MMAR_3445	SP(Sec/SPI)	0.813051	0.085385	0.082271	0.019293	CS pos: 31-32. ARG-AV. Pr: 0.5035
MMAR_4776	OTHER	0.007338	0.001801	0.000443	0.990418
MMAR_3440	SP(Sec/SPI)	0.607862	0.02842	0.073112	0.290605	CS pos: 30-31. TAS-IE. Pr: 0.1317
MMAR_4771	OTHER	0.009639	0.00057	0.000853	0.988937
MMAR_4770	TAT(Tat/SPI)	0.002155	0.879795	0.117147	0.000904	CS pos: 49-50. AMA-DA. Pr: 0.3699
MMAR_2110	OTHER	0.007449	0.001843	0.001162	0.989546
MMAR_3442	OTHER	0.020377	0.001794	0.00268	0.975149
MMAR_4773	OTHER	0.023767	0.020786	0.02019	0.935258
MMAR_2111	OTHER	0.007557	0.011922	0.001932	0.978589
MMAR_3441	OTHER	0.148829	0.004058	0.033378	0.813735
MMAR_4772	OTHER	0.006183	0.002723	0.000575	0.990519
MMAR_2127	OTHER	0.004403	0.00144	0.000425	0.993732
MMAR_2128	OTHER	0.011307	0.003666	0.002408	0.982619
MMAR_4789	OTHER	0.048791	0.007281	0.007777	0.936151
MMAR_2129	OTHER	0.040884	0.011601	0.011839	0.935676
MMAR_2123	OTHER	0.004784	0.000479	0.00084	0.993897
MMAR_3455	OTHER	0.01869	0.029938	0.003968	0.947403
MMAR_4786	SP(Sec/SPI)	0.443332	0.29793	0.034333	0.224405	CS pos: 44-45. AAA-DE. Pr: 0.2007
MMAR_2124	OTHER	0.012177	0.045727	0.003416	0.938679
MMAR_3454	OTHER	0.010064	0.006961	0.000938	0.982037
MMAR_4785	OTHER	0.062646	0.007828	0.018463	0.911063
MMAR_2125	OTHER	0.072121	0.060523	0.0212	0.846156
MMAR_3457	OTHER	0.032308	0.075671	0.003767	0.888254
MMAR_4788	OTHER	0.018226	0.001911	0.002115	0.977748
MMAR_2126	OTHER	0.019449	0.000874	0.029034	0.950643
MMAR_3456	OTHER	0.010382	0.002516	0.002209	0.984893
MMAR_4787	OTHER	0.011747	0.005687	0.002547	0.980019
MMAR_3451	OTHER	0.019097	0.010513	0.003608	0.966782
MMAR_4782	OTHER	0.020595	0.002687	0.000992	0.975727
MMAR_2120	OTHER	0.137662	0.004789	0.1107	0.746849
MMAR_3450	SP(Sec/SPI)	0.528403	0.021329	0.019795	0.430473	CS pos: 21-22. ARA-GD. Pr: 0.4810
MMAR_4781	OTHER	0.020312	0.004009	0.038714	0.936965
MMAR_2121	OTHER	0.021617	0.005736	0.002958	0.969689
MMAR_3453	OTHER	0.022484	0.003796	0.001245	0.972476
MMAR_4784	OTHER	0.005421	0.00103	0.000371	0.993178
MMAR_2122	LIPO(Sec/SPII)	0.138653	0.336993	0.516989	0.007365	CS pos: 47-48. LSA-CS. Pr: 0.5427
MMAR_3452	OTHER	0.01002	0.005992	0.000922	0.983066
MMAR_4783	OTHER	0.051537	0.025708	0.007171	0.915584
MMAR_4780	SP(Sec/SPI)	0.398212	0.36423	0.061566	0.175992	CS pos: 30-31. AGA-TV. Pr: 0.1870
MMAR_2219	OTHER	0.019004	0.004057	0.116009	0.860931
MMAR_2215	OTHER	0.03179	0.005577	0.00395	0.958683
MMAR_3547	OTHER	0.020456	0.033066	0.002123	0.944355
MMAR_4878	OTHER	0.01268	0.001742	0.001834	0.983744
MMAR_2216	OTHER	0.051779	0.03836	0.024071	0.885789
MMAR_3546	SP(Sec/SPI)	0.38749	0.342897	0.01364	0.255973	CS pos: 29-30. ASA-AW. Pr: 0.2926
MMAR_4877	OTHER	0.10551	0.018159	0.243106	0.633226
MMAR_2217	OTHER	0.02234	0.002821	0.001962	0.972876
MMAR_3549	OTHER	0.010839	0.001344	0.002252	0.985565
MMAR_2218	OTHER	0.010311	0.002928	0.001015	0.985745
MMAR_3548	OTHER	0.105036	0.138869	0.009115	0.74698
MMAR_4879	OTHER	0.021562	0.003794	0.003124	0.97152
MMAR_2211	OTHER	0.003657	0.000406	0.000604	0.995333
MMAR_3543	OTHER	0.018433	0.001207	0.002183	0.978177
MMAR_4874	OTHER	0.0052	0.000355	0.000574	0.993871
MMAR_2212	OTHER	0.017836	0.004857	0.001449	0.975858
MMAR_3542	OTHER	0.001757	0.001118	0.004535	0.99259
MMAR_4873	OTHER	0.005392	0.000595	0.000681	0.993333
MMAR_2213	OTHER	0.010183	0.018538	0.002707	0.968572
MMAR_3545	OTHER	0.015817	0.004066	0.003613	0.976505
MMAR_4876	OTHER	0.087974	0.0735	0.018089	0.820436
MMAR_2214	OTHER	0.030943	0.013032	0.001716	0.954309
MMAR_3544	OTHER	0.036943	0.215399	0.067985	0.679673
MMAR_4875	OTHER	0.24015	0.066422	0.015122	0.678306
MMAR_4870	OTHER	0.035219	0.001256	0.020137	0.943389
MMAR_3541	OTHER	0.022202	0.00286	0.004562	0.970375
MMAR_4872	OTHER	0.100653	0.003005	0.027088	0.869254
MMAR_2210	OTHER	0.023153	0.008755	0.013057	0.955035
MMAR_3540	LIPO(Sec/SPII)	0.002681	0.000766	0.996214	0.00034	CS pos: 23-24. AVG-CG. Pr: 0.9965
MMAR_4871	OTHER	0.0189	0.003313	0.004726	0.97306
MMAR_2226	OTHER	0.010358	0.007572	0.003807	0.978263
MMAR_3558	OTHER	0.005645	0.001526	0.001041	0.991788
MMAR_4889	OTHER	0.004511	0.000192	0.000651	0.994645
MMAR_2227	OTHER	0.008149	0.001919	0.001993	0.987939
MMAR_3557	OTHER	0.008368	0.003996	0.000494	0.987142
MMAR_4888	OTHER	0.030109	0.00226	0.004196	0.963434
MMAR_2228	OTHER	0.01862	0.009792	0.001321	0.970268
MMAR_2229	OTHER	0.063489	0.031617	0.029279	0.875615
MMAR_3559	OTHER	0.022102	0.001302	0.002137	0.974458
MMAR_2222	OTHER	0.003433	0.000388	0.000592	0.995587
MMAR_3554	OTHER	0.111913	0.097368	0.005553	0.785166
MMAR_4885	OTHER	0.009256	0.003814	0.00207	0.98486
MMAR_2223	OTHER	0.015245	0.00407	0.002338	0.978347
MMAR_3553	OTHER	0.02265	0.000594	0.006725	0.97003
MMAR_4884	LIPO(Sec/SPII)	0.003965	0.000429	0.995377	0.000229	CS pos: 19-20. LAG-CS. Pr: 0.9963
MMAR_2224	OTHER	0.00843	0.000471	0.002356	0.988743
MMAR_3556	OTHER	0.067392	0.011126	0.024262	0.89722
MMAR_4887	OTHER	0.27657	0.147478	0.045265	0.530688
MMAR_2225	LIPO(Sec/SPII)	0.008703	0.000344	0.990427	0.000525	CS pos: 22-23. MAA-CT. Pr: 0.9914
MMAR_3555	OTHER	0.143633	0.01523	0.245693	0.595444
MMAR_4886	OTHER	0.005057	0.000334	0.000626	0.993983
MMAR_3550	TAT(Tat/SPI)	0.343202	0.373927	0.023937	0.258935	CS pos: 33-34. AAA-AP. Pr: 0.1206
MMAR_4881	OTHER	0.009137	0.000761	0.001292	0.98881
MMAR_4880	OTHER	0.013541	0.006425	0.002029	0.978005
MMAR_2220	LIPO(Sec/SPII)	0.001027	0.12263	0.875847	0.000496	CS pos: 23-24. VAG-CS. Pr: 0.8817
MMAR_3552	SP(Sec/SPI)	0.752231	0.02	0.094968	0.132801	CS pos: 28-29. RLA-GI. Pr: 0.2144
MMAR_4883	OTHER	0.0316	0.002212	0.013742	0.952446
MMAR_2221	OTHER	0.014441	0.001253	0.000833	0.983472
MMAR_3551	SP(Sec/SPI)	0.52312	0.460364	0.014252	0.002264	CS pos: 32-33. AAA-TP. Pr: 0.6174
MMAR_4882	OTHER	0.030506	0.060462	0.00399	0.905042
MMAR_3529	OTHER	0.059902	0.002781	0.004056	0.933261
MMAR_3528	OTHER	0.042345	0.0047	0.009071	0.943885
MMAR_4859	OTHER	0.009561	0.003893	0.001426	0.985119
MMAR_0499	LIPO(Sec/SPII)	0.01883	0.006746	0.974026	0.000398	CS pos: 19-20. VAA-CS. Pr: 0.9735
MMAR_3525	OTHER	0.013726	0.000555	0.001273	0.984445
MMAR_4856	OTHER	0.003598	0.000139	0.000387	0.995876
MMAR_3524	OTHER	0.450201	0.02529	0.0205	0.504009
MMAR_4855	OTHER	0.035971	0.092304	0.008368	0.863358
MMAR_3527	OTHER	0.006631	0.000616	0.001677	0.991076
MMAR_4858	OTHER	0.033761	0.030805	0.003491	0.931944
MMAR_3526	OTHER	0.005497	0.021496	0.0024	0.970607
MMAR_4857	OTHER	0.117026	0.012194	0.016714	0.854067
MMAR_0494	OTHER	0.004354	0.004629	0.00118	0.989837
MMAR_3521	OTHER	0.001822	0.000351	0.000249	0.997579
MMAR_4852	OTHER	0.00584	0.001155	0.000779	0.992227
MMAR_0493	OTHER	0.020556	0.017195	0.006457	0.955792
MMAR_3520	OTHER	0.011421	0.004706	0.001921	0.981952
MMAR_4851	OTHER	0.013278	0.00248	0.00256	0.981682
MMAR_0492	OTHER	0.275766	0.177326	0.01754	0.529368
MMAR_3523	OTHER	0.093777	0.002076	0.015471	0.888676
MMAR_4854	OTHER	0.158704	0.070343	0.041986	0.728968
MMAR_0491	OTHER	0.305519	0.10939	0.020955	0.564136
MMAR_3522	OTHER	0.011457	0.001364	0.003746	0.983433
MMAR_4853	OTHER	0.013222	0.003514	0.002987	0.980278
MMAR_0498	SP(Sec/SPI)	0.679754	0.253298	0.033595	0.033353	CS pos: 32-33. VHS-GS. Pr: 0.3089
MMAR_0497	SP(Sec/SPI)	0.475787	0.01932	0.163696	0.341196	CS pos: 32-33. VQQ-DT. Pr: 0.1083
MMAR_0496	OTHER	0.089578	0.0074	0.018835	0.884187
MMAR_4850	TAT(Tat/SPI)	0.306035	0.662322	0.001981	0.029662	CS pos: 29-30. ALA-AD. Pr: 0.9075
MMAR_0495	TAT(Tat/SPI)	0.05045	0.943084	0.004519	0.001946	CS pos: 41-42. GNA-TT. Pr: 0.7412
MMAR_0490	OTHER	0.01036	0.003604	0.001935	0.984101
MMAR_2208	OTHER	0.041648	0.014531	0.01204	0.931781
MMAR_2209	OTHER	0.003193	0.000309	0.000757	0.995741
MMAR_3539	SP(Sec/SPI)	0.386132	0.209881	0.12107	0.282917	CS pos: 34-35. VDR-SP. Pr: 0.0397
MMAR_2204	OTHER	0.08542	0.015209	0.343861	0.55551
MMAR_3536	OTHER	0.008224	0.000986	0.000972	0.989818
MMAR_4867	OTHER	0.237515	0.017109	0.016612	0.728764
MMAR_2205	OTHER	0.005019	0.001839	0.000732	0.99241
MMAR_3535	OTHER	0.007747	0.001608	0.022885	0.96776
MMAR_4866	SP(Sec/SPI)	0.454405	0.007012	0.091483	0.4471	CS pos: 35-36. IYA-EY. Pr: 0.2311
MMAR_2206	OTHER	0.008955	0.011453	0.00221	0.977382
MMAR_3538	OTHER	0.005732	0.001674	0.018505	0.974088
MMAR_4869	OTHER	0.012227	0.001415	0.000812	0.985546
MMAR_2207	OTHER	0.048827	0.007801	0.008791	0.934581
MMAR_3537	TAT(Tat/SPI)	0.036446	0.543305	0.002654	0.417595	CS pos: 59-60. AIA-RG. Pr: 0.1856
MMAR_4868	OTHER	0.006101	0.001566	0.0007	0.991633
MMAR_2200	OTHER	0.020083	0.001127	0.002718	0.976072
MMAR_4863	LIPO(Sec/SPII)	0.006293	0.012746	0.979516	0.001445	CS pos: 22-23. LTA-CG. Pr: 0.9673
MMAR_2201	OTHER	0.014852	0.004323	0.002066	0.978758
MMAR_4862	OTHER	0.021945	0.00032	0.047736	0.93
MMAR_2202	OTHER	0.03978	0.023968	0.020167	0.916085
MMAR_3534	OTHER	0.175213	0.154467	0.016374	0.653946
MMAR_4865	OTHER	0.227764	0.06916	0.028366	0.674709
MMAR_2203	OTHER	0.028805	0.00329	0.0068	0.961105
MMAR_3533	OTHER	0.010565	0.006519	0.003624	0.979292
MMAR_4864	OTHER	0.006258	0.003898	0.001264	0.98858
MMAR_3530	SP(Sec/SPI)	0.967581	0.031316	0.000714	0.00039	CS pos: 28-29. AHA-DI. Pr: 0.9702
MMAR_4861	OTHER	0.033229	0.014126	0.016187	0.936458
MMAR_4860	OTHER	0.028386	0.013917	0.054331	0.903367
MMAR_3507	OTHER	0.006529	0.008758	0.000788	0.983925
MMAR_4838	OTHER	0.003404	0.000807	0.000594	0.995195
MMAR_0479	OTHER	0.019235	0.003817	0.003306	0.973642
MMAR_3506	OTHER	0.008462	0.00044	0.015624	0.975473
MMAR_4837	OTHER	0.017519	0.01329	0.003124	0.966067
MMAR_0478	SP(Sec/SPI)	0.472929	0.339345	0.018159	0.169567	CS pos: 41-42. ALA-AG. Pr: 0.2256
MMAR_3509	OTHER	0.008679	0.000557	0.001449	0.989316
MMAR_0477	OTHER	0.018003	0.004649	0.037078	0.94027
MMAR_3508	LIPO(Sec/SPII)	0.020246	0.001609	0.977873	0.000272	CS pos: 20-21. IAG-CA. Pr: 0.9789
MMAR_4839	OTHER	0.019291	0.012687	0.005021	0.963001
MMAR_3503	OTHER	0.005018	0.000194	0.005159	0.989629
MMAR_4834	OTHER	0.018826	0.338795	0.00277	0.639609
MMAR_3502	OTHER	0.094279	0.009161	0.010931	0.885629
MMAR_4833	OTHER	0.002439	0.000221	0.000302	0.997039
MMAR_3505	OTHER	0.017788	0.001075	0.002897	0.97824
MMAR_4836	OTHER	0.006909	0.001128	0.004932	0.987031
MMAR_3504	OTHER	0.024857	0.009628	0.003497	0.962018
MMAR_4835	OTHER	0.029807	0.268834	0.00326	0.6981
MMAR_0472	OTHER	0.0337	0.014659	0.002939	0.948702
MMAR_4830	OTHER	0.004224	0.001081	0.000718	0.993978
MMAR_0471	OTHER	0.003916	0.000856	0.000656	0.994571
MMAR_0470	OTHER	0.039778	0.144235	0.004599	0.811388
MMAR_3501	OTHER	0.145958	0.022504	0.011748	0.81979
MMAR_4832	OTHER	0.005561	0.001411	0.000672	0.992356
MMAR_3500	OTHER	0.00264	0.000844	0.000414	0.996102
MMAR_4831	OTHER	0.006089	0.001208	0.000698	0.992005
MMAR_0476	OTHER	0.316771	0.026116	0.16978	0.487334
MMAR_0475	OTHER	0.176962	0.007577	0.02774	0.787721
MMAR_0474	OTHER	0.021175	0.013667	0.006123	0.959035
MMAR_0473	OTHER	0.009034	0.011549	0.000915	0.978503
MMAR_3518	OTHER	0.021992	0.001303	0.005075	0.97163
MMAR_4849	OTHER	0.014469	0.003746	0.00186	0.979925
MMAR_3517	OTHER	0.077412	0.003432	0.010481	0.908675
MMAR_4848	OTHER	0.013348	0.005601	0.003832	0.977218
MMAR_0489	OTHER	0.008608	0.004227	0.00229	0.984876
MMAR_0488	OTHER	0.003767	0.000439	0.000758	0.995036
MMAR_3519	OTHER	0.040877	0.015453	0.00182	0.94185
MMAR_3514	OTHER	0.074301	0.026159	0.032357	0.867184
MMAR_4845	OTHER	0.008073	0.001568	0.001806	0.988554
MMAR_3513	OTHER	0.063796	0.1947	0.019456	0.722047
MMAR_3516	OTHER	0.009151	0.002716	0.045856	0.942278
MMAR_4847	OTHER	0.111808	0.02444	0.006566	0.857186
MMAR_3515	OTHER	0.057977	0.001924	0.005655	0.934444
MMAR_4846	OTHER	0.017911	0.003618	0.004749	0.973721
MMAR_0483	OTHER	0.11552	0.033771	0.022992	0.827717
MMAR_3510	OTHER	0.014422	0.000273	0.000608	0.984696
MMAR_4841	OTHER	0.006876	0.000263	0.000908	0.991953
MMAR_0482	OTHER	0.071713	0.0048	0.001895	0.921593
MMAR_4840	OTHER	0.05674	0.002296	0.029351	0.911613
MMAR_0481	OTHER	0.004386	0.003535	0.000383	0.991696
MMAR_3512	OTHER	0.008518	0.002006	0.000877	0.9886
MMAR_4843	OTHER	0.009611	0.000676	0.001738	0.987975
MMAR_0480	OTHER	0.082683	0.105808	0.015197	0.796313
MMAR_3511	OTHER	0.021321	0.008319	0.001956	0.968405
MMAR_4842	OTHER	0.003913	0.000548	0.00073	0.994809
MMAR_0487	OTHER	0.007155	0.000572	0.000609	0.991665
MMAR_0484	OTHER	0.016877	0.000743	0.001247	0.981133
MMAR_4819	OTHER	0.007097	0.000507	0.00116	0.991236
MMAR_4816	OTHER	0.086394	0.01057	0.031779	0.871257
MMAR_4815	OTHER	0.057039	0.099095	0.010238	0.833628
MMAR_0456	OTHER	0.048198	0.046464	0.003052	0.902286
MMAR_4818	OTHER	0.010562	0.006835	0.00197	0.980633
MMAR_0455	OTHER	0.011776	0.002718	0.002308	0.983198
MMAR_4817	OTHER	0.062458	0.192141	0.007851	0.73755
MMAR_1786	OTHER	0.084978	0.021837	0.011588	0.881596
MMAR_4812	OTHER	0.00757	0.001483	0.000695	0.990252
MMAR_1787	OTHER	0.001751	0.000153	0.014828	0.983268
MMAR_4811	OTHER	0.010519	0.004276	0.001353	0.983852
MMAR_1788	OTHER	0.014741	0.000653	0.001167	0.983438
MMAR_4814	TAT(Tat/SPI)	0.374196	0.417993	0.030121	0.177691	CS pos: 42-43. VKA-GF. Pr: 0.3461
MMAR_0459	OTHER	0.011541	0.006323	0.001844	0.980292
MMAR_1789	OTHER	0.00895	0.000886	0.000938	0.989226
MMAR_4813	OTHER	0.017056	0.003068	0.006174	0.973702
MMAR_0450	OTHER	0.007896	0.035314	0.008618	0.948172
MMAR_1782	OTHER	0.02032	0.002466	0.000556	0.976658
MMAR_1783	OTHER	0.007042	0.016307	0.002004	0.974647
MMAR_1784	OTHER	0.015174	0.006677	0.004555	0.973594
MMAR_4810	SP(Sec/SPI)	0.796852	0.055087	0.007139	0.140922	CS pos: 39-40. SLA-AG. Pr: 0.5131
MMAR_1785	OTHER	0.037462	0.003743	0.006225	0.95257
MMAR_0454	OTHER	0.035403	0.002763	0.013358	0.948477
MMAR_0453	OTHER	0.032955	0.008494	0.004021	0.95453
MMAR_0452	OTHER	0.003827	0.000377	0.000577	0.995218
MMAR_1780	OTHER	0.003518	0.000565	0.013913	0.982004
MMAR_0451	OTHER	0.007085	0.001144	0.000871	0.9909
MMAR_1781	OTHER	0.01105	0.004105	0.002176	0.982668
MMAR_0469	OTHER	0.00274	0.001249	0.000383	0.995628
MMAR_4827	OTHER	0.008233	0.002605	0.00063	0.988533
MMAR_0468	OTHER	0.005587	0.00069	0.001921	0.991801
MMAR_4826	OTHER	0.017592	0.002667	0.002933	0.976808
MMAR_0467	OTHER	0.011321	0.000452	0.001749	0.986478
MMAR_4829	OTHER	0.084994	0.004756	0.029205	0.881045
MMAR_0466	OTHER	0.044703	0.003036	0.011696	0.940565
MMAR_4828	OTHER	0.088559	0.097039	0.024218	0.790184
MMAR_1797	SP(Sec/SPI)	0.992228	0.001072	0.006303	0.000398	CS pos: 24-25. ASA-DT. Pr: 0.9061
MMAR_4823	OTHER	0.006034	0.000623	0.001032	0.992312
MMAR_1798	OTHER	0.00261	0.000249	0.000452	0.996689
MMAR_4822	OTHER	0.197925	0.347815	0.014944	0.439316
MMAR_1799	OTHER	0.014016	0.000446	0.001547	0.983991
MMAR_4825	OTHER	0.009134	0.001928	0.002209	0.986728
MMAR_4824	OTHER	0.005577	0.00195	0.00077	0.991702
MMAR_0461	OTHER	0.020595	0.013346	0.018486	0.947573
MMAR_1793	OTHER	0.009496	0.000453	0.000591	0.989461
MMAR_0460	OTHER	0.051355	0.011829	0.004576	0.932241
MMAR_1794	OTHER	0.004906	0.000488	0.00097	0.993636
MMAR_1795	OTHER	0.025152	0.009489	0.00391	0.961449
MMAR_4821	OTHER	0.016587	0.000409	0.006257	0.976747
MMAR_1796	OTHER	0.012032	0.018582	0.000909	0.968478
MMAR_4820	OTHER	0.004835	0.000242	0.000849	0.994074
MMAR_0465	OTHER	0.075957	0.010834	0.002689	0.910521
MMAR_0464	OTHER	0.004806	0.000226	0.00046	0.994508
MMAR_1790	OTHER	0.015234	0.075574	0.001382	0.90781
MMAR_0463	OTHER	0.06046	0.047006	0.01869	0.873845
MMAR_1791	OTHER	0.019409	0.001325	0.007537	0.97173
MMAR_0462	OTHER	0.008092	0.001621	0.036037	0.95425
MMAR_1792	OTHER	0.006249	0.001845	0.001639	0.990267
MMAR_0436	OTHER	0.153466	0.141212	0.010919	0.694403
MMAR_1768	OTHER	0.009485	0.001642	0.001455	0.987418
MMAR_0435	SP(Sec/SPI)	0.746397	0.238689	0.012548	0.002366	CS pos: 35-36. AVA-DP. Pr: 0.9231
MMAR_1769	OTHER	0.007766	0.000103	0.002204	0.989927
MMAR_0434	OTHER	0.024058	0.001927	0.02413	0.949886
MMAR_0433	OTHER	0.005353	0.000392	0.000945	0.993309
MMAR_1764	SP(Sec/SPI)	0.572994	0.106653	0.042013	0.27834	CS pos: 42-43. SDA-GS. Pr: 0.1921
MMAR_0439	OTHER	0.007182	0.000775	0.004923	0.987121
MMAR_1765	OTHER	0.024244	0.001293	0.008716	0.965747
MMAR_0438	OTHER	0.004183	0.000299	0.000934	0.994584
MMAR_1766	OTHER	0.01039	0.000484	0.000983	0.988143
MMAR_0437	OTHER	0.013302	0.000994	0.031193	0.95451
MMAR_1767	LIPO(Sec/SPII)	0.026707	0.001298	0.580422	0.391573	CS pos: 14-15. GMG-CR. Pr: 0.5851
MMAR_1760	OTHER	0.004644	0.000918	0.001304	0.993134
MMAR_1761	OTHER	0.021456	0.002435	0.005485	0.970625
MMAR_1762	OTHER	0.008359	0.001566	0.001792	0.988282
MMAR_1763	LIPO(Sec/SPII)	0.001317	0.02566	0.972719	0.000304	CS pos: 24-25. LSG-CS. Pr: 0.9608
MMAR_0432	OTHER	0.015707	0.017192	0.001253	0.965848
MMAR_0431	OTHER	0.177161	0.123564	0.008217	0.691058
MMAR_0430	OTHER	0.017151	0.034961	0.004766	0.943122
MMAR_4809	OTHER	0.034341	0.001043	0.00544	0.959176
MMAR_4808	OTHER	0.328679	0.113865	0.052181	0.505275
MMAR_0447	OTHER	0.011124	0.00931	0.001017	0.978549
MMAR_1779	OTHER	0.037065	0.064605	0.016904	0.881426
MMAR_4805	OTHER	0.05657	0.018921	0.004332	0.920178
MMAR_0446	OTHER	0.384628	0.006361	0.110637	0.498374
MMAR_4804	OTHER	0.015409	0.002254	0.015622	0.966715
MMAR_0445	OTHER	0.004192	0.00017	0.009557	0.986081
MMAR_4807	OTHER	0.024643	0.062396	0.003837	0.909124
MMAR_0444	OTHER	0.068736	0.001779	0.00643	0.923055
MMAR_4806	OTHER	0.196564	0.127052	0.068548	0.607835
MMAR_1775	OTHER	0.088547	0.031857	0.024649	0.854947
MMAR_4801	OTHER	0.017203	0.001707	0.002481	0.978608
MMAR_1776	OTHER	0.008644	0.000484	0.026999	0.963873
MMAR_4800	LIPO(Sec/SPII)	0.328614	0.021229	0.633986	0.016172	CS pos: 16-17. GVA-CG. Pr: 0.4034
MMAR_0449	OTHER	0.1398	0.030219	0.01017	0.819811
MMAR_1777	OTHER	0.005374	0.000729	0.000644	0.993253
MMAR_4803	OTHER	0.007985	0.00064	0.005305	0.986069
MMAR_0448	OTHER	0.042453	0.062941	0.013059	0.881548
MMAR_1778	OTHER	0.036684	0.00573	0.006647	0.950939
MMAR_4802	SP(Sec/SPI)	0.837458	0.154142	0.004028	0.004371	CS pos: 37-38. AHA-AA. Pr: 0.8528
MMAR_1771	OTHER	0.011931	0.006405	0.00092	0.980745
MMAR_1772	OTHER	0.007345	0.000756	0.001833	0.990066
MMAR_1773	OTHER	0.015742	0.024109	0.002536	0.957614
MMAR_1774	OTHER	0.008903	0.002838	0.003175	0.985084
MMAR_0443	SP(Sec/SPI)	0.69184	0.282754	0.014786	0.01062	CS pos: 36-37. ATG-AT. Pr: 0.4156
MMAR_0442	OTHER	0.38475	0.02305	0.077412	0.514788
MMAR_0441	OTHER	0.008016	0.003364	0.000928	0.987693
MMAR_0440	OTHER	0.001252	0.002706	0.02298	0.973062
MMAR_1770	OTHER	0.006281	0.00164	0.007931	0.984147
MMAR_0419	OTHER	0.013852	0.000687	0.005539	0.979922
MMAR_0414	SP(Sec/SPI)	0.857167	0.011665	0.03947	0.091697	CS pos: 38-39. IFA-RP. Pr: 0.6728
MMAR_1746	OTHER	0.004267	0.000774	0.00118	0.993779
MMAR_0413	OTHER	0.166338	0.00131	0.008365	0.823987
MMAR_1747	OTHER	0.03903	0.00142	0.003771	0.955779
MMAR_0412	OTHER	0.026496	0.000581	0.002895	0.970029
MMAR_1748	OTHER	0.171345	0.026289	0.026934	0.775432
MMAR_0411	OTHER	0.013561	0.002731	0.00244	0.981268
MMAR_1749	OTHER	0.020754	0.006596	0.001451	0.971199
MMAR_0418	OTHER	0.030199	0.063499	0.009793	0.896509
MMAR_1742	OTHER	0.006348	0.000996	0.001014	0.991642
MMAR_0417	OTHER	0.054814	0.003962	0.005952	0.935272
MMAR_1743	SP(Sec/SPI)	0.945513	0.012777	0.033011	0.008699	CS pos: 26-27. VRA-ST. Pr: 0.6056
MMAR_0416	LIPO(Sec/SPII)	0.038528	0.050381	0.860674	0.050417	CS pos: 48-49. LSS-CG. Pr: 0.8031
MMAR_1744	OTHER	0.033389	0.0081	0.002009	0.956501
MMAR_0415	OTHER	0.032565	0.000952	0.006075	0.960408
MMAR_1745	OTHER	0.01338	0.002616	0.006157	0.977847
MMAR_1740	OTHER	0.143129	0.021056	0.018949	0.816866
MMAR_1741	OTHER	0.004239	0.004057	0.000469	0.991235
MMAR_0410	OTHER	0.004552	0.000331	0.003478	0.991639
MMAR_0425	OTHER	0.052836	0.010674	0.005548	0.930941
MMAR_1757	OTHER	0.014161	0.3844	0.009306	0.592134
MMAR_0424	OTHER	0.015457	0.004813	0.005678	0.974051
MMAR_1758	OTHER	0.0539	0.016079	0.012512	0.917509
MMAR_0423	OTHER	0.121582	0.00713	0.015968	0.855321
MMAR_1759	OTHER	0.016903	0.023469	0.005681	0.953947
MMAR_0422	SP(Sec/SPI)	0.447934	0.133007	0.181646	0.237413	CS pos: 56-57. ARA-AD. Pr: 0.4471
MMAR_0429	OTHER	0.009179	0.003489	0.00135	0.985982
MMAR_1753	OTHER	0.029554	0.00924	0.001688	0.959519
MMAR_0428	OTHER	0.019678	0.096	0.003003	0.881319
MMAR_1754	OTHER	0.0392	0.003947	0.008391	0.948462
MMAR_0427	OTHER	0.009178	0.004221	0.001959	0.984642
MMAR_1755	OTHER	0.044043	0.285501	0.010835	0.659621
MMAR_0426	OTHER	0.020965	0.003327	0.004277	0.971431
MMAR_1756	OTHER	0.004519	0.002476	0.000629	0.992375
MMAR_1750	OTHER	0.11089	0.348979	0.00691	0.533222
MMAR_1751	OTHER	0.004641	0.000479	0.000722	0.994158
MMAR_1752	SP(Sec/SPI)	0.937488	0.060573	0.001698	0.000241	CS pos: 32-33. ASA-AP. Pr: 0.8814
MMAR_0421	OTHER	0.020078	0.00572	0.003886	0.970315
MMAR_0420	OTHER	0.049753	0.069055	0.048299	0.832893
MMAR_1728	OTHER	0.009473	0.006167	0.001837	0.982522
MMAR_1729	OTHER	0.135723	0.156778	0.008662	0.698837
MMAR_1724	OTHER	0.005659	0.007391	0.001124	0.985826
MMAR_1725	OTHER	0.019217	0.010725	0.005655	0.964403
MMAR_1726	OTHER	0.001846	0.000304	0.000431	0.99742
MMAR_1727	OTHER	0.002862	0.000639	0.000603	0.995896
MMAR_1720	OTHER	0.01263	0.002359	0.002167	0.982844
MMAR_1721	OTHER	0.316966	0.285577	0.030377	0.36708
MMAR_1722	OTHER	0.44535	0.01084	0.060517	0.483293
MMAR_1723	OTHER	0.423303	0.018931	0.067845	0.489922
MMAR_0409	OTHER	0.008219	0.003251	0.001726	0.986803
MMAR_0408	OTHER	0.01662	0.006975	0.034379	0.942026
MMAR_1739	OTHER	0.009323	0.005525	0.011573	0.973579
MMAR_0403	OTHER	0.048698	0.005899	0.012303	0.933099
MMAR_1735	OTHER	0.006625	0.001458	0.000787	0.99113
MMAR_0402	OTHER	0.080033	0.022088	0.021525	0.876354
MMAR_1736	OTHER	0.007101	0.00093	0.00151	0.990459
MMAR_0401	OTHER	0.12804	0.016142	0.002897	0.852922
MMAR_1737	OTHER	0.004844	0.001443	0.001526	0.992187
MMAR_0400	OTHER	0.034159	0.008174	0.00434	0.953327
MMAR_1738	OTHER	0.050753	0.016605	0.004997	0.927645
MMAR_0407	OTHER	0.038478	0.001907	0.004563	0.955052
MMAR_1731	OTHER	0.058741	0.05917	0.007191	0.874898
MMAR_0406	OTHER	0.009135	0.000331	0.000447	0.990087
MMAR_1732	OTHER	0.452717	0.036072	0.027047	0.484163
MMAR_0405	OTHER	0.020013	0.002052	0.002845	0.97509
MMAR_1733	OTHER	0.023757	0.007911	0.027652	0.94068
MMAR_0404	OTHER	0.03713	0.098653	0.002199	0.862018
MMAR_1734	OTHER	0.035398	0.037724	0.015334	0.911544
MMAR_1730	OTHER	0.038514	0.008876	0.009503	0.943106
MMAR_1706	LIPO(Sec/SPII)	0.002397	0.000417	0.996972	0.000214	CS pos: 23-24. SSG-CA. Pr: 0.9969
MMAR_1707	OTHER	0.054974	0.014622	0.005815	0.924589
MMAR_1708	OTHER	0.041416	0.017316	0.008053	0.933214
MMAR_1709	OTHER	0.055027	0.01245	0.018544	0.913979
MMAR_1702	OTHER	0.012282	0.011787	0.003731	0.9722
MMAR_1703	OTHER	0.016852	0.000282	0.015397	0.967469
MMAR_1704	OTHER	0.068087	0.003038	0.00514	0.923736
MMAR_1705	OTHER	0.011037	0.004072	0.000741	0.98415
MMAR_1700	OTHER	0.099262	0.027936	0.007902	0.8649
MMAR_1701	OTHER	0.005879	0.005285	0.0006	0.988235
MMAR_1717	OTHER	0.017854	0.0021	0.003832	0.976214
MMAR_1718	OTHER	0.032824	0.001439	0.003267	0.96247
MMAR_1719	OTHER	0.011374	0.001102	0.001297	0.986227
MMAR_1713	OTHER	0.268214	0.037849	0.039839	0.654098
MMAR_1714	OTHER	0.034121	0.005651	0.007819	0.952409
MMAR_1715	OTHER	0.012094	0.000741	0.002496	0.984668
MMAR_1716	OTHER	0.010041	0.000186	0.001212	0.98856
MMAR_1710	OTHER	0.025012	0.006489	0.002075	0.966424
MMAR_1711	OTHER	0.008866	0.009176	0.00087	0.981088
MMAR_1712	OTHER	0.006569	0.001948	0.000525	0.990958
MMAR_1809	OTHER	0.007851	0.000475	0.001504	0.990169
MMAR_1805	OTHER	0.027332	0.015839	0.00724	0.949589
MMAR_1806	OTHER	0.028622	0.022317	0.00548	0.943581
MMAR_1807	OTHER	0.002532	0.000948	0.00031	0.996211
MMAR_1808	OTHER	0.020776	0.002265	0.00208	0.974879
MMAR_1801	OTHER	0.00859	0.005845	0.001661	0.983904
MMAR_1802	OTHER	0.016006	0.00215	0.001444	0.9804
MMAR_1803	LIPO(Sec/SPII)	0.009623	0.002432	0.987413	0.000532	CS pos: 25-26. LTG-CE. Pr: 0.9875
MMAR_1804	OTHER	0.003614	0.001125	0.000553	0.994708
MMAR_1800	OTHER	0.009176	0.00073	0.000666	0.989428
MMAR_4078	OTHER	0.013624	0.008452	0.00445	0.973473
MMAR_4077	OTHER	0.062507	0.026829	0.002141	0.908522
MMAR_4079	OTHER	0.006807	0.000302	0.000949	0.991942
MMAR_4074	OTHER	0.089391	0.039243	0.025526	0.84584
MMAR_4073	OTHER	0.018253	0.008165	0.00653	0.967052
MMAR_4076	OTHER	0.003834	0.001712	0.00045	0.994004
MMAR_4075	OTHER	0.014799	0.005097	0.001724	0.978381
MMAR_4070	OTHER	0.008893	0.001076	0.001284	0.988747
MMAR_4072	OTHER	0.006174	0.00182	0.000695	0.991311
MMAR_4071	OTHER	0.016676	0.002135	0.014776	0.966412
MMAR_4090	OTHER	0.161295	0.032774	0.008111	0.79782
MMAR_1816	OTHER	0.118352	0.059842	0.00483	0.816975
MMAR_1817	OTHER	0.066362	0.05112	0.004089	0.878429
MMAR_1818	SP(Sec/SPI)	0.933119	0.049114	0.007196	0.010572	CS pos: 25-26. AHA-DD. Pr: 0.9481
MMAR_1819	OTHER	0.001533	9.1e-05	0.000216	0.99816
MMAR_1812	OTHER	0.014563	0.001868	0.002009	0.98156
MMAR_1813	OTHER	0.038485	0.004866	0.004564	0.952084
MMAR_1814	OTHER	0.010098	0.003929	0.002566	0.983407
MMAR_1815	OTHER	0.006914	0.000988	0.000751	0.991347
MMAR_1810	OTHER	0.03057	0.004072	0.007306	0.958051
MMAR_1811	OTHER	0.007963	0.006878	0.001356	0.983803
MMAR_4089	OTHER	0.004046	0.000259	0.000395	0.9953
MMAR_4088	OTHER	0.014102	0.00743	0.001256	0.977212
MMAR_4085	OTHER	0.077437	0.004013	0.016533	0.902016
MMAR_4084	OTHER	0.010854	0.00068	0.001116	0.98735
MMAR_4087	OTHER	0.005375	0.000734	0.000884	0.993007
MMAR_4086	OTHER	0.006562	0.001109	0.001399	0.99093
MMAR_4081	OTHER	0.024537	0.004591	0.009083	0.961789
MMAR_4080	OTHER	0.018538	0.004058	0.001851	0.975553
MMAR_4083	OTHER	0.08533	0.023805	0.020873	0.869993
MMAR_4082	OTHER	0.004861	0.000209	0.000758	0.994172
MMAR_4059	OTHER	0.012088	0.001175	0.001836	0.9849
MMAR_4056	OTHER	0.121866	0.006805	0.016887	0.854442
MMAR_5388	OTHER	0.003804	0.000552	0.00037	0.995274
MMAR_4055	LIPO(Sec/SPII)	0.003112	0.000707	0.994558	0.001623	CS pos: 25-26. VSG-CS. Pr: 0.9945
MMAR_5389	OTHER	0.020384	0.035056	0.002647	0.941913
MMAR_4058	OTHER	0.036555	0.003359	0.002371	0.957715
MMAR_5386	OTHER	0.010477	0.054893	0.00147	0.933161
MMAR_4057	OTHER	0.016049	0.013551	0.006409	0.963991
MMAR_5387	OTHER	0.049316	0.068156	0.006856	0.875673
MMAR_4052	OTHER	0.171783	0.003797	0.032073	0.792346
MMAR_5384	OTHER	0.010721	0.006925	0.001629	0.980725
MMAR_4051	OTHER	0.032102	0.003458	0.007132	0.957308
MMAR_5385	SP(Sec/SPI)	0.80968	0.022213	0.018441	0.149667	CS pos: 27-28. VYA-RP. Pr: 0.6729
MMAR_4054	OTHER	0.415392	0.022936	0.13822	0.423452
MMAR_5382	OTHER	0.003366	0.007208	0.000899	0.988526
MMAR_4053	OTHER	0.170434	0.008318	0.080132	0.741116
MMAR_5383	OTHER	0.009586	0.0073	0.001726	0.981387
MMAR_5380	OTHER	0.038812	0.02248	0.003641	0.935067
MMAR_5381	OTHER	0.079056	0.003129	0.0236	0.894216
MMAR_4050	OTHER	0.009225	0.000535	0.007616	0.982624
MMAR_4067	OTHER	0.04271	0.004037	0.006046	0.947206
MMAR_5399	OTHER	0.013488	0.005842	0.001838	0.978832
MMAR_4066	OTHER	0.071732	0.015217	0.005942	0.907108
MMAR_4069	OTHER	0.077436	0.033607	0.097543	0.791413
MMAR_5397	OTHER	0.033928	0.023554	0.004154	0.938363
MMAR_4068	OTHER	0.007462	0.002622	0.00218	0.987736
MMAR_5398	OTHER	0.027802	0.003804	0.00727	0.961123
MMAR_4063	OTHER	0.018254	0.002363	0.002631	0.976752
MMAR_5395	OTHER	0.172078	0.297161	0.082974	0.447787
MMAR_4062	OTHER	0.353602	0.013203	0.045921	0.587273
MMAR_5396	OTHER	0.003641	0.000383	0.000698	0.995278
MMAR_4065	OTHER	0.165435	0.051474	0.005519	0.777572
MMAR_5393	OTHER	0.006656	0.000232	0.001434	0.991679
MMAR_4064	OTHER	0.01638	0.002264	0.008014	0.973343
MMAR_5394	OTHER	0.018536	0.005233	0.004532	0.971699
MMAR_5391	OTHER	0.07163	0.031562	0.02117	0.875638
MMAR_5392	OTHER	0.073199	0.222449	0.035297	0.669056
MMAR_4061	OTHER	0.005954	0.000978	0.000705	0.992364
MMAR_4060	OTHER	0.125747	0.384789	0.017466	0.471998
MMAR_5390	OTHER	0.191871	0.073776	0.046946	0.687407
MMAR_4038	LIPO(Sec/SPII)	0.009527	0.003925	0.878869	0.107678	CS pos: 25-26. ASG-CL. Pr: 0.8714
MMAR_4037	OTHER	0.006086	0.001977	0.000652	0.991285
MMAR_5368	TAT(Tat/SPI)	0.423076	0.542606	0.012432	0.021886	CS pos: 43-44. ASA-FS. Pr: 0.5263
MMAR_4039	OTHER	0.009009	0.000386	0.010289	0.980316
MMAR_5369	OTHER	0.008949	0.000591	0.00404	0.98642
MMAR_4034	OTHER	0.004248	0.001039	0.000649	0.994064
MMAR_5366	OTHER	0.102471	0.383644	0.073563	0.440322
MMAR_4033	OTHER	0.10463	0.034561	0.011975	0.848833
MMAR_5367	SP(Sec/SPI)	0.950385	0.006673	0.03516	0.007781	CS pos: 35-36. ANA-AP. Pr: 0.8567
MMAR_4036	OTHER	0.03888	0.011178	0.027399	0.922542
MMAR_5364	OTHER	0.003289	0.002484	0.000416	0.993811
MMAR_4035	OTHER	0.041033	0.005992	0.00578	0.947194
MMAR_5365	OTHER	0.001853	0.000102	0.000273	0.997772
MMAR_4030	OTHER	0.006096	0.000294	0.000692	0.992917
MMAR_5362	OTHER	0.125065	0.131581	0.012017	0.731338
MMAR_5363	OTHER	0.01977	0.006506	0.003506	0.970219
MMAR_4032	OTHER	0.017441	0.014104	0.001027	0.967427
MMAR_5360	OTHER	0.179845	0.003129	0.012563	0.804463
MMAR_4031	OTHER	0.185307	0.081198	0.054477	0.679017
MMAR_5361	OTHER	0.008033	0.001064	0.001138	0.989765
MMAR_4049	OTHER	0.003235	0.001806	0.007999	0.98696
MMAR_4048	SP(Sec/SPI)	0.982077	0.015773	0.001761	0.00039	CS pos: 33-34. AHA-DN. Pr: 0.9760
MMAR_5379	OTHER	0.016396	0.000736	0.002091	0.980778
MMAR_4045	OTHER	0.033156	0.011048	0.012208	0.943588
MMAR_5377	OTHER	0.019105	0.001068	0.014125	0.965701
MMAR_4044	OTHER	0.094958	0.028979	0.013885	0.862178
MMAR_5378	OTHER	0.024594	0.006028	0.015025	0.954352
MMAR_4047	OTHER	0.009901	0.006249	0.001483	0.982367
MMAR_5375	SP(Sec/SPI)	0.458095	0.102626	0.138887	0.300393	CS pos: 35-36. THE-QP. Pr: 0.1305
MMAR_4046	OTHER	0.020736	0.007458	0.001881	0.969925
MMAR_5376	OTHER	0.061515	0.26659	0.031175	0.64072
MMAR_4041	OTHER	0.047168	0.004097	0.008961	0.939774
MMAR_5373	OTHER	0.100423	0.037361	0.031937	0.830279
MMAR_4040	OTHER	0.123479	0.098712	0.015532	0.762276
MMAR_5374	OTHER	0.154665	0.006583	0.119333	0.71942
MMAR_4043	OTHER	0.049784	0.001391	0.011185	0.937641
MMAR_5371	OTHER	0.014891	0.010301	0.00915	0.965658
MMAR_4042	OTHER	0.0315	0.003495	0.007954	0.957051
MMAR_5372	OTHER	0.01728	0.008473	0.002457	0.97179
MMAR_5370	OTHER	0.009887	0.002971	0.014968	0.972174
MMAR_4019	OTHER	0.006754	0.000361	0.001625	0.991259
MMAR_5348	OTHER	0.017283	0.002485	0.010715	0.969517
MMAR_4015	OTHER	0.010597	0.002014	0.001761	0.985629
MMAR_5349	OTHER	0.01797	0.001446	0.004057	0.976527
MMAR_4018	OTHER	0.029846	0.032409	0.006788	0.930957
MMAR_5346	OTHER	0.011905	0.001065	0.002004	0.985026
MMAR_4017	OTHER	0.002791	0.000378	0.000843	0.995988
MMAR_5347	OTHER	0.011341	0.001229	0.001779	0.985652
MMAR_4012	OTHER	0.004741	0.000196	0.000277	0.994786
MMAR_5344	OTHER	0.306415	0.205261	0.01439	0.473934
MMAR_4011	OTHER	0.042453	0.029826	0.003551	0.92417
MMAR_5345	OTHER	0.0205	0.000911	0.00065	0.977939
MMAR_4014	OTHER	0.018642	0.000938	0.001548	0.978871
MMAR_5342	OTHER	0.004572	0.000202	0.001023	0.994203
MMAR_4013	OTHER	0.034103	0.009376	0.009095	0.947427
MMAR_5343	OTHER	0.002678	0.00082	0.000485	0.996016
MMAR_5340	OTHER	0.042066	0.010688	0.003195	0.944052
MMAR_5341	OTHER	0.276692	0.307785	0.017159	0.398365
MMAR_4010	OTHER	0.009762	0.030455	0.001177	0.958605
MMAR_4027	OTHER	0.011618	0.006709	0.001117	0.980556
MMAR_5359	SP(Sec/SPI)	0.934803	0.029732	0.034114	0.00135	CS pos: 31-32. AGA-IP. Pr: 0.5540
MMAR_4026	OTHER	0.014484	0.002076	0.001526	0.981914
MMAR_4029	OTHER	0.004571	0.000843	0.000663	0.993923
MMAR_5357	OTHER	0.140139	0.045235	0.01614	0.798486
MMAR_4028	SP(Sec/SPI)	0.5117	0.010274	0.467424	0.010602	CS pos: 28-29. TVA-DP. Pr: 0.3286
MMAR_5358	TAT(Tat/SPI)	0.050561	0.758486	0.165759	0.025194	CS pos: 45-46. VLA-TS. Pr: 0.1239
MMAR_4023	OTHER	0.024908	0.003283	0.000965	0.970844
MMAR_5355	OTHER	0.267634	0.053578	0.018521	0.660267
MMAR_4022	OTHER	0.005328	0.03989	0.000569	0.954213
MMAR_5356	OTHER	0.362617	0.109988	0.082237	0.445158
MMAR_4025	OTHER	0.011193	0.054028	0.001848	0.932931
MMAR_5353	OTHER	0.029116	0.012453	0.017488	0.940943
MMAR_4024	OTHER	0.005301	0.000407	0.000347	0.993945
MMAR_5354	SP(Sec/SPI)	0.611451	0.025016	0.113132	0.250401	CS pos: 30-31. AIS-QV. Pr: 0.1542
MMAR_5351	OTHER	0.005707	0.000987	0.002472	0.990833
MMAR_5352	OTHER	0.060761	0.021799	0.012415	0.905026
MMAR_4021	OTHER	0.071394	0.068942	0.010806	0.848858
MMAR_4020	OTHER	0.009441	0.001013	0.001816	0.987729
MMAR_5350	OTHER	0.004371	0.000435	0.001087	0.994106
MMAR_5328	OTHER	0.022045	0.000888	0.000745	0.976322
MMAR_5329	OTHER	0.012388	0.001595	0.000866	0.985151
MMAR_2299	OTHER	0.006234	0.002438	0.001424	0.989904
MMAR_5326	OTHER	0.174638	0.026989	0.019472	0.7789
MMAR_5327	OTHER	0.004542	0.000613	0.000484	0.994361
MMAR_5324	OTHER	0.00785	0.000459	0.000625	0.991066
MMAR_5325	OTHER	0.013793	0.001486	0.003118	0.981604
MMAR_2295	OTHER	0.071546	0.011399	0.265636	0.651419
MMAR_5322	OTHER	0.223999	0.303852	0.015219	0.45693
MMAR_2296	OTHER	0.01647	0.011854	0.00261	0.969067
MMAR_5323	OTHER	0.180821	0.095794	0.007494	0.715891
MMAR_2297	OTHER	0.006072	0.012482	0.001784	0.979662
MMAR_5320	OTHER	0.010254	0.000894	0.001654	0.987197
MMAR_2298	OTHER	0.009389	0.003054	0.001269	0.986288
MMAR_5321	OTHER	0.231117	0.143211	0.016638	0.609034
MMAR_2291	OTHER	0.008095	0.00082	0.00144	0.989644
MMAR_2292	OTHER	0.292892	0.020329	0.023055	0.663724
MMAR_2293	OTHER	0.0485	0.001288	0.142712	0.8075
MMAR_2294	OTHER	0.422132	0.01175	0.005871	0.560247
MMAR_2290	OTHER	0.005343	0.00073	0.000614	0.993312
MMAR_4009	OTHER	0.094617	0.017183	0.024054	0.864146
MMAR_4008	OTHER	0.026334	0.032694	0.004631	0.93634
MMAR_5339	OTHER	0.07889	0.164032	0.004317	0.752761
MMAR_4005	OTHER	0.184165	0.213579	0.082259	0.519997
MMAR_5337	OTHER	0.009354	0.000674	0.001566	0.988406
MMAR_4004	OTHER	0.010022	0.001101	0.002823	0.986055
MMAR_5338	OTHER	0.011127	0.006558	0.004677	0.977638
MMAR_4007	OTHER	0.066533	0.015534	0.041355	0.876579
MMAR_5335	OTHER	0.003039	0.000838	0.000691	0.995432
MMAR_4006	OTHER	0.009437	0.004749	0.000722	0.985091
MMAR_5336	OTHER	0.008829	0.027118	0.001011	0.963042
MMAR_4001	OTHER	0.005418	0.001423	0.000989	0.99217
MMAR_5333	OTHER	0.008158	0.061556	0.001452	0.928835
MMAR_4000	OTHER	0.006451	0.002156	0.00187	0.989523
MMAR_5334	OTHER	0.092331	0.002203	0.04295	0.862515
MMAR_4003	OTHER	0.026999	0.013172	0.003133	0.956696
MMAR_5331	OTHER	0.03741	0.015305	0.00256	0.944726
MMAR_4002	OTHER	0.091487	0.219684	0.017104	0.671726
MMAR_5332	OTHER	0.022111	0.004816	0.002637	0.970436
MMAR_5330	OTHER	0.003787	0.000652	0.001025	0.994536
MMAR_5308	SP(Sec/SPI)	0.469537	0.364708	0.024228	0.141526	CS pos: 32-33. AWA-AG. Pr: 0.4229
MMAR_5309	OTHER	0.012206	0.004832	0.003199	0.979762
MMAR_5306	OTHER	0.147713	0.21508	0.020814	0.616392
MMAR_5307	SP(Sec/SPI)	0.469537	0.364708	0.024228	0.141526	CS pos: 32-33. AWA-AG. Pr: 0.4229
MMAR_2277	OTHER	0.016177	0.004985	0.001207	0.977631
MMAR_5304	OTHER	0.005393	0.004714	0.000941	0.988952
MMAR_2278	OTHER	0.00848	0.000586	0.00042	0.990514
MMAR_5305	OTHER	0.037145	0.01107	0.008135	0.94365
MMAR_2279	OTHER	0.014202	0.003873	0.002791	0.979135
MMAR_5302	LIPO(Sec/SPII)	0.024828	0.000802	0.973743	0.000627	CS pos: 26-27. VAA-CG. Pr: 0.8558
MMAR_5303	OTHER	0.019384	0.002145	0.022587	0.955885
MMAR_2273	OTHER	0.006686	0.003584	0.000953	0.988777
MMAR_5300	OTHER	0.013945	0.000878	0.007473	0.977704
MMAR_2274	OTHER	0.146035	0.096347	0.00556	0.752058
MMAR_5301	OTHER	0.023743	0.004199	0.015384	0.956674
MMAR_2275	OTHER	0.031381	0.006468	0.021956	0.940194
MMAR_2276	OTHER	0.058921	0.002504	0.013149	0.925427
MMAR_2270	OTHER	0.020205	0.00159	0.001561	0.976645
MMAR_2271	OTHER	0.002408	0.00026	0.000161	0.997171
MMAR_2272	OTHER	0.35344	0.071234	0.02225	0.553076
MMAR_5319	OTHER	0.015549	0.000469	0.002753	0.98123
MMAR_5317	OTHER	0.007483	0.003051	0.000399	0.989067
MMAR_5318	OTHER	0.008114	0.000605	0.012535	0.978746
MMAR_2288	OTHER	0.001191	0.000797	0.003692	0.994321
MMAR_5315	SP(Sec/SPI)	0.541619	0.049236	0.049751	0.359395	CS pos: 32-33. TDA-NP. Pr: 0.2276
MMAR_2289	OTHER	0.018169	0.022652	0.002025	0.957155
MMAR_5316	OTHER	0.414019	0.016559	0.11018	0.459242
MMAR_5313	OTHER	0.01004	0.001594	0.000974	0.987393
MMAR_5314	OTHER	0.017923	0.005109	0.001937	0.97503
MMAR_2284	SP(Sec/SPI)	0.938875	0.04122	0.006772	0.013133	CS pos: 39-40. VNA-DS. Pr: 0.8948
MMAR_5311	OTHER	0.001147	0.000639	0.000945	0.997269
MMAR_2285	SP(Sec/SPI)	0.976619	0.009517	0.006001	0.007864	CS pos: 38-39. ADA-DP. Pr: 0.8953
MMAR_5312	OTHER	0.010296	0.003757	0.001937	0.98401
MMAR_2286	OTHER	0.016364	0.001499	0.005466	0.976671
MMAR_2287	OTHER	0.008165	0.001035	0.000892	0.989907
MMAR_5310	OTHER	0.044942	0.032403	0.008826	0.913829
MMAR_2280	OTHER	0.049077	0.078458	0.013341	0.859123
MMAR_2281	OTHER	0.004392	0.003291	0.001774	0.990544
MMAR_2282	OTHER	0.008351	0.000464	0.001468	0.989717
MMAR_2283	OTHER	0.032216	0.052019	0.00386	0.911905
MMAR_2259	OTHER	0.00806	0.000774	0.00153	0.989635
MMAR_2255	OTHER	0.035618	0.007201	0.016143	0.941038
MMAR_3587	OTHER	0.050769	0.006088	0.003049	0.940093
MMAR_2256	OTHER	0.106445	0.036287	0.058518	0.798749
MMAR_3586	OTHER	0.002572	0.001274	0.000721	0.995433
MMAR_2257	OTHER	0.008795	0.003479	0.000978	0.986747
MMAR_2258	OTHER	0.010508	0.006555	0.001428	0.981508
MMAR_3588	SP(Sec/SPI)	0.541919	0.059093	0.04616	0.352828	CS pos: 28-29. VYA-RG. Pr: 0.3183
MMAR_2251	OTHER	0.039467	0.001925	0.001028	0.95758
MMAR_3583	OTHER	0.059934	0.009768	0.014181	0.916117
MMAR_2252	OTHER	0.027105	0.008195	0.018892	0.945808
MMAR_3582	OTHER	0.007059	0.003999	0.000794	0.988148
MMAR_2253	OTHER	0.011846	0.002819	0.001926	0.983409
MMAR_3585	OTHER	0.006601	0.001897	0.001189	0.990313
MMAR_2254	OTHER	0.008857	0.002068	0.000937	0.988139
MMAR_3584	OTHER	0.151983	0.133327	0.027339	0.687351
MMAR_3581	OTHER	0.139321	0.109862	0.019917	0.7309
MMAR_2250	OTHER	0.021213	0.007907	0.002172	0.968708
MMAR_3580	OTHER	0.022722	0.003425	0.011218	0.962635
MMAR_2266	OTHER	0.02288	0.002662	0.002151	0.972307
MMAR_3598	OTHER	0.01644	0.001308	0.004705	0.977547
MMAR_2267	OTHER	0.006948	0.010059	0.000633	0.982361
MMAR_3597	OTHER	0.005253	0.000202	0.000305	0.99424
MMAR_2268	OTHER	0.023238	0.002767	0.001194	0.972801
MMAR_2269	OTHER	0.002951	0.000866	0.000382	0.995801
MMAR_3599	OTHER	0.013296	0.003554	0.001938	0.981213
MMAR_2262	OTHER	0.005157	0.000589	0.003461	0.990792
MMAR_3594	OTHER	0.01502	0.14219	0.003733	0.839057
MMAR_2263	OTHER	0.041642	0.003668	0.00129	0.9534
MMAR_3593	SP(Sec/SPI)	0.958898	0.02666	0.004759	0.009683	CS pos: 23-24. ATA-SP. Pr: 0.4937
MMAR_2264	OTHER	0.05043	0.334295	0.005293	0.609981
MMAR_3596	OTHER	0.098191	0.031892	0.050129	0.819789
MMAR_2265	OTHER	0.013747	0.012788	0.002163	0.971301
MMAR_3595	OTHER	0.016797	0.014688	0.004507	0.964009
MMAR_2260	OTHER	0.011026	0.001005	0.002009	0.985959
MMAR_3592	OTHER	0.070375	0.033897	0.020029	0.875699
MMAR_2261	OTHER	0.205681	0.074053	0.032699	0.687567
MMAR_3591	OTHER	0.01412	0.003345	0.001747	0.980787
MMAR_2237	OTHER	0.066739	0.006634	0.011433	0.915195
MMAR_3569	OTHER	0.181893	0.024259	0.004044	0.789804
MMAR_2238	TAT(Tat/SPI)	0.33387	0.558248	0.004616	0.103266	CS pos: 50-51. AAA-VP. Pr: 0.8262
MMAR_3568	OTHER	0.051682	0.014781	0.010253	0.923284
MMAR_4899	OTHER	0.153529	0.071886	0.008648	0.765937
MMAR_2239	OTHER	0.003757	0.000252	0.000555	0.995435
MMAR_2233	OTHER	0.044331	0.201859	0.010332	0.743477
MMAR_3565	OTHER	0.004592	0.008237	0.000937	0.986234
MMAR_4896	OTHER	0.004039	0.000452	0.000985	0.994524
MMAR_2234	OTHER	0.007698	0.010737	0.000998	0.980567
MMAR_3564	OTHER	0.025707	0.004365	0.001109	0.968819
MMAR_4895	OTHER	0.016248	0.018034	0.001409	0.964309
MMAR_2235	OTHER	0.248678	0.144758	0.012779	0.593785
MMAR_4898	OTHER	0.006918	0.000483	0.000622	0.991977
MMAR_2236	OTHER	0.006634	0.0008	0.000768	0.991798
MMAR_3566	TAT(Tat/SPI)	0.001688	0.997531	0.0003	0.00048	CS pos: 42-43. AYG-AG. Pr: 0.5720
MMAR_4897	OTHER	0.01448	0.000989	0.000904	0.983626
MMAR_3561	OTHER	0.127498	0.241152	0.039169	0.592181
MMAR_4892	OTHER	0.30365	0.006058	0.053816	0.636476
MMAR_2230	OTHER	0.032793	0.125449	0.00225	0.839509
MMAR_3560	OTHER	0.015204	0.160675	0.002817	0.821304
MMAR_4891	OTHER	0.007935	0.002436	0.001764	0.987864
MMAR_2231	OTHER	0.052172	0.020453	0.059466	0.867909
MMAR_3563	OTHER	0.009653	0.00654	0.001172	0.982636
MMAR_4894	OTHER	0.022567	0.005704	0.00123	0.9705
MMAR_2232	OTHER	0.064118	0.018526	0.033072	0.884284
MMAR_3562	OTHER	0.028198	0.080647	0.004146	0.887009
MMAR_4893	OTHER	0.011112	0.003943	0.001322	0.983624
MMAR_4890	OTHER	0.013702	0.001881	0.003144	0.981273
MMAR_2248	SP(Sec/SPI)	0.567193	0.326758	0.017361	0.088688	CS pos: 31-32. ANA-AA. Pr: 0.4147
MMAR_2249	OTHER	0.008233	0.003042	0.001021	0.987704
MMAR_3579	OTHER	0.073615	0.214332	0.006557	0.705497
MMAR_2244	OTHER	0.005644	0.00082	0.001838	0.991699
MMAR_3576	OTHER	0.01184	0.001114	0.002593	0.984452
MMAR_2245	OTHER	0.023415	0.001473	0.006192	0.968921
MMAR_3575	OTHER	0.005226	0.000333	0.000667	0.993775
MMAR_2246	OTHER	0.153018	0.002811	0.021657	0.822514
MMAR_3578	SP(Sec/SPI)	0.462741	0.281368	0.017275	0.238615	CS pos: 35-36. GLA-AE. Pr: 0.2904
MMAR_2247	OTHER	0.003092	0.000527	0.000889	0.995492
MMAR_3577	OTHER	0.021844	0.004979	0.004603	0.968574
MMAR_2240	OTHER	0.005181	0.001493	0.001152	0.992174
MMAR_3572	OTHER	0.217392	0.020658	0.004216	0.757733
MMAR_2241	OTHER	0.008579	0.000436	0.000914	0.990071
MMAR_3571	OTHER	0.174389	0.268617	0.016975	0.540018
MMAR_2242	OTHER	0.01405	0.001862	0.002286	0.981802
MMAR_3574	OTHER	0.012408	0.003671	0.001005	0.982916
MMAR_2243	OTHER	0.065758	0.021261	0.016228	0.896753
MMAR_3573	LIPO(Sec/SPII)	0.081633	0.047324	0.865127	0.005917	CS pos: 36-37. AIG-CG. Pr: 0.8570
MMAR_3570	OTHER	0.290454	0.305606	0.010078	0.393863
MMAR_1009	SP(Sec/SPI)	0.978815	0.019718	0.001168	0.000299	CS pos: 30-31. ANA-KN. Pr: 0.9425
MMAR_1005	OTHER	0.026449	0.002403	0.005298	0.96585
MMAR_2336	OTHER	0.377486	0.007095	0.041851	0.573569
MMAR_3668	OTHER	0.012385	0.007033	0.001761	0.978821
MMAR_4999	SP(Sec/SPI)	0.488776	0.208609	0.020043	0.282572	CS pos: 33-34. AAA-AS. Pr: 0.1466
MMAR_1006	SP(Sec/SPI)	0.517056	0.0046	0.102985	0.375359	CS pos: 33-34. FFG-AD. Pr: 0.1346
MMAR_2337	OTHER	0.032499	0.011186	0.159033	0.797282
MMAR_3667	OTHER	0.021313	0.001737	0.004998	0.971951
MMAR_4998	OTHER	0.006967	0.004755	0.00114	0.987138
MMAR_1007	OTHER	0.011042	0.015943	0.000878	0.972137
MMAR_2338	OTHER	0.088743	0.010361	0.015417	0.885479
MMAR_1008	LIPO(Sec/SPII)	0.002436	0.00046	0.99687	0.000234	CS pos: 28-29. LAG-CS. Pr: 0.9967
MMAR_2339	OTHER	0.021377	0.000955	0.00239	0.975278
MMAR_3669	OTHER	0.02883	0.05413	0.001287	0.915752
MMAR_1001	OTHER	0.003678	0.000925	0.000274	0.995123
MMAR_2332	OTHER	0.023748	0.001493	0.001416	0.973343
MMAR_3664	OTHER	0.201545	0.312018	0.008255	0.478182
MMAR_4995	OTHER	0.332022	0.242979	0.027582	0.397418
MMAR_1002	OTHER	0.003483	0.000241	0.000343	0.995933
MMAR_2333	OTHER	0.009609	0.000348	0.001202	0.988841
MMAR_3663	OTHER	0.071329	0.09519	0.004842	0.828639
MMAR_4994	OTHER	0.006221	0.000564	0.000687	0.992528
MMAR_1003	SP(Sec/SPI)	0.880661	0.04573	0.006987	0.066622	CS pos: 24-25. ASA-SE. Pr: 0.5291
MMAR_2334	OTHER	0.017137	0.000512	0.00287	0.979481
MMAR_3666	OTHER	0.105459	0.079554	0.005906	0.809081
MMAR_4997	OTHER	0.017548	0.001777	0.001556	0.979118
MMAR_1004	OTHER	0.056905	0.016851	0.002326	0.923918
MMAR_2335	OTHER	0.014212	0.017031	0.003307	0.96545
MMAR_3665	OTHER	0.105459	0.079554	0.005906	0.809081
MMAR_4996	OTHER	0.148902	0.121732	0.036834	0.692532
MMAR_3660	OTHER	0.071329	0.09519	0.004842	0.828639
MMAR_4991	OTHER	0.006408	0.000351	0.001386	0.991855
MMAR_4990	OTHER	0.107468	0.052316	0.009515	0.830702
MMAR_2330	OTHER	0.036814	0.016555	0.010761	0.93587
MMAR_3662	OTHER	0.024582	0.003887	0.004153	0.967378
MMAR_4993	OTHER	0.005853	0.004933	0.000735	0.988479
MMAR_1000	LIPO(Sec/SPII)	0.005049	0.000281	0.994267	0.000403	CS pos: 17-18. LAG-CG. Pr: 0.9953
MMAR_2331	OTHER	0.006394	0.003536	0.001101	0.988969
MMAR_3661	OTHER	0.201545	0.312018	0.008255	0.478182
MMAR_4992	OTHER	0.045096	0.037383	0.007336	0.910185
MMAR_1016	OTHER	0.041335	0.018077	0.011222	0.929365
MMAR_2347	OTHER	0.027826	0.00217	0.008107	0.961898
MMAR_3679	OTHER	0.028331	0.00986	0.004978	0.956831
MMAR_1017	OTHER	0.015173	0.011855	0.002735	0.970238
MMAR_2348	OTHER	0.017045	0.006246	0.004853	0.971856
MMAR_3678	OTHER	0.014576	0.004408	0.002999	0.978017
MMAR_1018	OTHER	0.008037	0.003746	0.001704	0.986513
MMAR_2349	OTHER	0.031394	0.000895	0.003076	0.964634
MMAR_1019	OTHER	0.015208	0.004782	0.002182	0.977829
MMAR_1012	OTHER	0.006114	0.000654	0.000551	0.992681
MMAR_2343	OTHER	0.029913	0.004207	0.00544	0.96044
MMAR_3675	OTHER	0.024742	0.002255	0.001808	0.971195
MMAR_1013	OTHER	0.008639	0.000379	0.001037	0.989945
MMAR_2344	LIPO(Sec/SPII)	0.019516	0.000691	0.550579	0.429214	CS pos: 15-16. GMA-CR. Pr: 0.5553
MMAR_3674	OTHER	0.008603	0.012621	0.003621	0.975155
MMAR_1014	OTHER	0.004826	0.000422	0.000625	0.994127
MMAR_2345	OTHER	0.026229	0.000752	0.001263	0.971756
MMAR_3677	OTHER	0.002791	0.000682	0.000306	0.996221
MMAR_1015	OTHER	0.004942	0.000456	0.02485	0.969752
MMAR_2346	OTHER	0.094171	0.058394	0.045969	0.801465
MMAR_3676	SP(Sec/SPI)	0.597895	0.039484	0.045287	0.317334	CS pos: 25-26. IDA-AI. Pr: 0.3095
MMAR_3671	OTHER	0.022982	0.013938	0.004247	0.958833
MMAR_2340	OTHER	0.030658	0.001514	0.151754	0.816074
MMAR_3670	OTHER	0.001709	0.00016	0.000296	0.997835
MMAR_1010	OTHER	0.036312	0.005355	0.006181	0.952151
MMAR_2341	OTHER	0.002458	0.000602	0.000369	0.99657
MMAR_3673	OTHER	0.03285	0.006868	0.026753	0.933528
MMAR_1011	OTHER	0.030476	0.03424	0.008342	0.926942
MMAR_2342	SP(Sec/SPI)	0.566221	0.126799	0.004813	0.302168	CS pos: 48-49. MEA-AA. Pr: 0.3283
MMAR_3672	OTHER	0.004222	0.002209	0.001043	0.992527
MMAR_2318	OTHER	0.011093	0.000751	0.000883	0.987272
MMAR_2319	TAT(Tat/SPI)	0.077276	0.536673	0.016761	0.36929	CS pos: 39-40. IWA-LS. Pr: 0.2015
MMAR_3649	OTHER	0.070277	0.026902	0.095999	0.806822
MMAR_2314	OTHER	0.002107	0.000132	0.000295	0.997466
MMAR_3646	OTHER	0.004759	0.009799	0.001593	0.98385
MMAR_4977	OTHER	0.098249	0.014879	0.00668	0.880192
MMAR_2315	OTHER	0.009953	0.000585	0.001163	0.988299
MMAR_3645	OTHER	0.006971	0.00112	0.0007	0.991208
MMAR_4976	OTHER	0.005771	0.000699	0.000915	0.992615
MMAR_2316	OTHER	0.018954	0.015347	0.004242	0.961457
MMAR_3648	OTHER	0.355602	0.026616	0.010154	0.607628
MMAR_4979	SP(Sec/SPI)	0.989894	0.006863	0.002004	0.001239	CS pos: 31-32. AHA-LG. Pr: 0.9585
MMAR_2317	OTHER	0.016066	0.001937	0.004491	0.977507
MMAR_3647	SP(Sec/SPI)	0.62475	0.19853	0.101537	0.075183	CS pos: 29-30. RRA-GV. Pr: 0.1800
MMAR_4978	OTHER	0.016974	0.003974	0.002604	0.976448
MMAR_2310	OTHER	0.078029	0.000734	0.006537	0.914701
MMAR_3642	OTHER	0.114478	0.001373	0.010238	0.873911
MMAR_4973	OTHER	0.011056	0.004291	0.051843	0.932811
MMAR_2311	OTHER	0.005416	0.001331	0.001766	0.991486
MMAR_3641	OTHER	0.127702	0.033751	0.013098	0.825449
MMAR_4972	OTHER	0.004306	0.001084	0.000938	0.993671
MMAR_2312	OTHER	0.049009	0.249639	0.003871	0.697481
MMAR_3644	OTHER	0.043608	0.015902	0.010684	0.929806
MMAR_4975	SP(Sec/SPI)	0.692593	0.049276	0.056331	0.201799	CS pos: 36-37. AES-TA. Pr: 0.1823
MMAR_2313	OTHER	0.041236	0.001134	0.001175	0.956456
MMAR_3643	OTHER	0.010136	0.01412	0.001006	0.974739
MMAR_4974	OTHER	0.035247	0.155912	0.005715	0.803126
MMAR_3640	OTHER	0.004119	0.004534	0.001501	0.989846
MMAR_4971	OTHER	0.017223	0.006228	0.00271	0.97384
MMAR_4970	OTHER	0.021382	0.049078	0.003611	0.925929
MMAR_2329	OTHER	0.001836	0.000106	0.000184	0.997874
MMAR_2325	OTHER	0.002444	0.000332	0.000623	0.996601
MMAR_3657	TAT(Tat/SPI)	0.023687	0.973838	0.00048	0.001994	CS pos: 40-41. AYG-AG. Pr: 0.5267
MMAR_4988	OTHER	0.009932	0.001321	0.000937	0.98781
MMAR_2326	OTHER	0.003211	0.000782	0.0015	0.994507
MMAR_3656	TAT(Tat/SPI)	0.009042	0.990208	0.000245	0.000505	CS pos: 40-41. AYA-AG. Pr: 0.9497
MMAR_4987	SP(Sec/SPI)	0.680383	0.101166	0.028244	0.190208	CS pos: 36-37. TSA-FT. Pr: 0.6473
MMAR_2327	OTHER	0.000874	0.000204	0.001274	0.997648
MMAR_3659	OTHER	0.024582	0.003887	0.004153	0.967378
MMAR_2328	OTHER	0.027756	0.004007	0.002936	0.965301
MMAR_3658	OTHER	0.09196	0.009855	0.0227	0.875485
MMAR_4989	OTHER	0.005671	0.001349	0.001112	0.991868
MMAR_2321	OTHER	0.009164	0.000189	0.000953	0.989693
MMAR_3653	OTHER	0.024467	0.003494	0.003822	0.968217
MMAR_4984	OTHER	0.224793	0.009523	0.09466	0.671024
MMAR_2322	OTHER	0.023172	0.000301	0.00073	0.975796
MMAR_3652	SP(Sec/SPI)	0.96441	0.007043	0.018143	0.010404	CS pos: 26-27. SGA-QP. Pr: 0.7905
MMAR_4983	LIPO(Sec/SPII)	0.002252	0.000226	0.99677	0.000752	CS pos: 20-21. LAG-CQ. Pr: 0.9975
MMAR_2323	OTHER	0.209448	0.00839	0.081151	0.701011
MMAR_3655	OTHER	0.183588	0.040711	0.055159	0.720542
MMAR_4986	OTHER	0.106259	0.007122	0.028389	0.85823
MMAR_2324	OTHER	0.002857	0.000779	0.000713	0.99565
MMAR_3654	OTHER	0.063438	0.087368	0.004413	0.844781
MMAR_4985	OTHER	0.244446	0.009773	0.031117	0.714665
MMAR_4980	OTHER	0.128264	0.011913	0.037011	0.822812
MMAR_3651	OTHER	0.137938	0.02582	0.394572	0.44167
MMAR_4982	OTHER	0.125302	0.00146	0.002863	0.870375
MMAR_2320	OTHER	0.050465	0.001021	0.005921	0.942593
MMAR_3650	OTHER	0.022738	0.003558	0.002854	0.970851
MMAR_4981	OTHER	0.082611	0.195867	0.024312	0.69721
MMAR_3628	OTHER	0.005728	0.00029	0.000783	0.9932
MMAR_4959	OTHER	0.004834	0.001393	0.000572	0.993201
MMAR_3627	OTHER	0.022215	0.036796	0.00374	0.937249
MMAR_4958	SP(Sec/SPI)	0.798711	0.195297	0.00129	0.004702	CS pos: 44-45. AYA-DA. Pr: 0.8178
MMAR_0599	SP(Sec/SPI)	0.788495	0.13357	0.059978	0.017957	CS pos: 39-40. SSA-RD. Pr: 0.4214
MMAR_0598	OTHER	0.024599	0.001557	0.001463	0.972381
MMAR_3629	LIPO(Sec/SPII)	0.030149	0.000931	0.966186	0.002734	CS pos: 24-25. VFG-CA. Pr: 0.8004
MMAR_3624	OTHER	0.004241	0.000793	0.000732	0.994234
MMAR_4955	OTHER	0.021304	0.002224	0.001425	0.975046
MMAR_3623	OTHER	0.061941	0.019215	0.018598	0.900245
MMAR_4954	OTHER	0.00979	0.006095	0.001758	0.982356
MMAR_3626	OTHER	0.030983	0.007775	0.028672	0.93257
MMAR_4957	OTHER	0.005132	0.000693	0.000745	0.99343
MMAR_3625	OTHER	0.013236	0.000731	0.015884	0.970149
MMAR_4956	OTHER	0.02886	0.003653	0.005113	0.962374
MMAR_0593	OTHER	0.00509	0.001532	0.000725	0.992653
MMAR_3620	OTHER	0.084359	0.006535	0.017232	0.891874
MMAR_4951	OTHER	0.01146	0.000987	0.001126	0.986427
MMAR_4950	OTHER	0.032319	0.007348	0.006432	0.9539
MMAR_3622	OTHER	0.016904	0.001762	0.001281	0.980053
MMAR_4953	OTHER	0.332277	0.114465	0.023652	0.529605
MMAR_0590	OTHER	0.038791	0.002787	0.005571	0.95285
MMAR_3621	OTHER	0.026133	0.125298	0.008542	0.840027
MMAR_4952	OTHER	0.010641	0.012729	0.001142	0.975488
MMAR_0597	OTHER	0.01816	0.001104	0.001959	0.978776
MMAR_0596	OTHER	0.02868	0.000577	0.002301	0.968443
MMAR_0595	OTHER	0.304559	0.058713	0.028861	0.607867
MMAR_0594	OTHER	0.021139	0.005757	0.003832	0.969271
MMAR_2307	SP(Sec/SPI)	0.714385	0.035094	0.009055	0.241467	CS pos: 44-45. VEA-PT. Pr: 0.6517
MMAR_3639	OTHER	0.098644	0.019168	0.126162	0.756027
MMAR_2308	OTHER	0.038226	0.00358	0.011604	0.946589
MMAR_3638	LIPO(Sec/SPII)	0.011577	0.000306	0.987734	0.000383	CS pos: 22-23. APG-CG. Pr: 0.9823
MMAR_4969	OTHER	0.024306	0.001259	0.00453	0.969905
MMAR_2309	OTHER	0.327616	0.012071	0.011218	0.649096
MMAR_2303	OTHER	0.10922	0.038837	0.009836	0.842107
MMAR_3635	OTHER	0.077685	0.079997	0.015383	0.826934
MMAR_4966	SP(Sec/SPI)	0.499052	0.046207	0.037542	0.417198	CS pos: 46-47. AHG-AL. Pr: 0.3323
MMAR_2304	OTHER	0.007027	0.005057	0.001903	0.986012
MMAR_3634	OTHER	0.037553	0.008867	0.003172	0.950409
MMAR_4965	OTHER	0.014713	0.004268	0.005944	0.975075
MMAR_2305	OTHER	0.032227	0.011388	0.002959	0.953426
MMAR_3637	OTHER	0.022128	0.00153	0.004121	0.972221
MMAR_4968	TAT(Tat/SPI)	0.113077	0.478281	0.026397	0.382245	CS pos: 47-48. AGA-VQ. Pr: 0.1694
MMAR_2306	OTHER	0.006267	0.00068	0.000606	0.992447
MMAR_3636	OTHER	0.017259	0.005929	0.002199	0.974613
MMAR_4967	OTHER	0.066682	0.032138	0.005557	0.895624
MMAR_3631	OTHER	0.002385	0.00103	0.000631	0.995954
MMAR_4962	OTHER	0.028862	0.000524	0.006019	0.964596
MMAR_2300	OTHER	0.339824	0.128929	0.089945	0.441302
MMAR_3630	OTHER	0.040057	0.083904	0.000987	0.875052
MMAR_4961	OTHER	0.036611	0.001299	0.042268	0.919823
MMAR_2301	OTHER	0.074471	0.011763	0.010003	0.903762
MMAR_3633	OTHER	0.013812	0.002585	0.003143	0.98046
MMAR_4964	OTHER	0.023111	0.003847	0.01159	0.961452
MMAR_2302	OTHER	0.022451	0.045419	0.005567	0.926564
MMAR_3632	OTHER	0.120076	0.043159	0.024081	0.812685
MMAR_4963	SP(Sec/SPI)	0.800572	0.014598	0.133419	0.05141	CS pos: 20-21. AFA-MP. Pr: 0.2198
MMAR_4960	OTHER	0.010957	0.004178	0.003146	0.98172
MMAR_3609	OTHER	0.030749	0.057768	0.00505	0.906434
MMAR_0579	OTHER	0.146918	0.026862	0.008591	0.817629
MMAR_3606	OTHER	0.050072	0.004972	0.005051	0.939904
MMAR_4937	OTHER	0.052991	0.003158	0.011492	0.932358
MMAR_0578	OTHER	0.020996	0.000475	0.003294	0.975235
MMAR_3605	OTHER	0.063919	0.012543	0.002977	0.92056
MMAR_4936	OTHER	0.056918	0.037392	0.012463	0.893227
MMAR_0577	OTHER	0.018413	0.001983	0.132661	0.846943
MMAR_3608	OTHER	0.009778	0.031038	0.001128	0.958056
MMAR_4939	OTHER	0.09973	0.13919	0.015343	0.745737
MMAR_0576	OTHER	0.015866	0.010681	0.003733	0.969719
MMAR_3607	OTHER	0.03575	0.010868	0.008687	0.944696
MMAR_4938	LIPO(Sec/SPII)	0.364522	0.01113	0.622998	0.001351	CS pos: 17-18. LTA-CA. Pr: 0.6217
MMAR_3602	OTHER	0.006225	0.000586	0.001446	0.991743
MMAR_4933	OTHER	0.004258	0.000599	0.001397	0.993746
MMAR_3601	OTHER	0.010085	0.012104	0.000627	0.977185
MMAR_4932	OTHER	0.004245	0.001241	0.000745	0.993768
MMAR_3604	OTHER	0.006	0.002059	0.000781	0.99116
MMAR_4935	OTHER	0.030264	0.002323	0.000788	0.966625
MMAR_3603	OTHER	0.004983	0.001446	0.001613	0.991958
MMAR_4934	OTHER	0.011536	0.000764	0.002392	0.985308
MMAR_0571	OTHER	0.013632	0.001036	0.000583	0.984749
MMAR_0570	OTHER	0.026846	0.001885	0.009553	0.961717
MMAR_3600	OTHER	0.002601	0.000177	0.000325	0.996897
MMAR_4931	TAT(Tat/SPI)	0.113338	0.755329	0.007516	0.123817	CS pos: 34-35. AHG-FP. Pr: 0.5495
MMAR_4930	OTHER	0.003026	0.000222	0.000367	0.996385
MMAR_0575	OTHER	0.031039	0.009771	0.004694	0.954495
MMAR_0574	OTHER	0.014749	0.002802	0.003386	0.979064
MMAR_0573	LIPO(Sec/SPII)	0.013946	0.010892	0.966816	0.008346	CS pos: 29-30. AAG-CG. Pr: 0.9562
MMAR_0572	SP(Sec/SPI)	0.577545	0.158057	0.031418	0.232981	CS pos: 33-34. AAA-AP. Pr: 0.2349
MMAR_3617	OTHER	0.001166	0.004405	0.009988	0.984442
MMAR_4948	OTHER	0.136336	0.138715	0.007273	0.717675
MMAR_0589	OTHER	0.022446	0.0069	0.005549	0.965105
MMAR_3616	OTHER	0.069474	0.281862	0.007493	0.641171
MMAR_4947	OTHER	0.046789	0.018302	0.010618	0.924291
MMAR_0588	OTHER	0.045328	0.020678	0.023839	0.910155
MMAR_3619	SP(Sec/SPI)	0.820445	0.019077	0.043617	0.116862	CS pos: 27-28. AVA-LD. Pr: 0.6646
MMAR_0587	OTHER	0.021784	0.02865	0.004562	0.945004
MMAR_3618	OTHER	0.307437	0.158326	0.027326	0.506912
MMAR_4949	OTHER	0.02132	0.001053	0.00102	0.976608
MMAR_3613	LIPO(Sec/SPII)	0.01103	0.128029	0.858981	0.00196	CS pos: 28-29. ASA-CG. Pr: 0.7154
MMAR_4944	OTHER	0.133953	0.004744	0.028052	0.833251
MMAR_3612	OTHER	0.025346	0.002342	0.013439	0.958873
MMAR_4943	SP(Sec/SPI)	0.411062	0.152367	0.027232	0.40934	CS pos: 41-42. ALG-ET. Pr: 0.1189
MMAR_3615	OTHER	0.00794	0.000291	0.00123	0.990539
MMAR_4946	OTHER	0.014865	0.004611	0.000688	0.979836
MMAR_3614	OTHER	0.05882	0.026651	0.010556	0.903973
MMAR_4945	OTHER	0.107607	0.001985	0.004548	0.88586
MMAR_0582	OTHER	0.009574	0.000742	0.002051	0.987634
MMAR_4940	OTHER	0.002078	0.000111	0.000219	0.997593
MMAR_0581	OTHER	0.014314	0.001355	0.002304	0.982027
MMAR_0580	OTHER	0.004395	0.002395	0.000461	0.992748
MMAR_3611	OTHER	0.004048	0.000315	0.00084	0.994797
MMAR_4942	OTHER	0.004766	0.000953	0.000418	0.993863
MMAR_3610	OTHER	0.04113	0.014862	0.009059	0.93495
MMAR_4941	OTHER	0.182266	0.023464	0.19457	0.599699
MMAR_0586	OTHER	0.036715	0.010221	0.004318	0.948746
MMAR_0585	OTHER	0.067977	0.000815	0.07198	0.859229
MMAR_0584	OTHER	0.058945	0.000874	0.00117	0.939011
MMAR_0583	OTHER	0.037961	0.010209	0.009076	0.942754
MMAR_4919	TAT(Tat/SPI)	0.01686	0.975933	0.006472	0.000735	CS pos: 41-42. SRA-AP. Pr: 0.6881
MMAR_4918	OTHER	0.021229	0.207108	0.008012	0.763651
MMAR_0557	OTHER	0.026767	0.053474	0.000706	0.919053
MMAR_1889	OTHER	0.012385	0.002146	0.002416	0.983054
MMAR_4915	OTHER	0.009124	0.000598	0.001015	0.989263
MMAR_0556	OTHER	0.0236	0.000452	0.00215	0.973799
MMAR_4914	OTHER	0.188542	0.130317	0.018267	0.662874
MMAR_0555	OTHER	0.005048	0.061125	0.000589	0.933238
MMAR_4917	OTHER	0.016992	0.001852	0.002498	0.978658
MMAR_0554	OTHER	0.009695	0.004	0.001165	0.98514
MMAR_4916	OTHER	0.010491	0.003515	0.001506	0.984488
MMAR_1885	OTHER	0.074286	0.046963	0.030901	0.84785
MMAR_4911	OTHER	0.051078	0.003757	0.008599	0.936565
MMAR_1886	OTHER	0.031864	0.016667	0.010861	0.940608
MMAR_4910	OTHER	0.166447	0.006848	0.003757	0.822949
MMAR_0559	SP(Sec/SPI)	0.977055	0.013323	0.006979	0.002644	CS pos: 28-29. AAA-GN. Pr: 0.3886
MMAR_1887	OTHER	0.02594	0.018755	0.005284	0.950022
MMAR_4913	OTHER	0.008095	0.004585	0.002023	0.985297
MMAR_0558	OTHER	0.017545	0.000684	0.016387	0.965384
MMAR_1888	OTHER	0.003333	0.000559	0.000513	0.995595
MMAR_4912	OTHER	0.014328	0.003563	0.001484	0.980625
MMAR_1881	OTHER	0.074103	0.078949	0.031262	0.815685
MMAR_1882	OTHER	0.001523	0.000153	0.000483	0.997841
MMAR_1883	OTHER	0.093865	0.021714	0.030996	0.853425
MMAR_1884	OTHER	0.027562	0.010117	0.002185	0.960137
MMAR_0553	OTHER	0.006761	0.00133	0.002267	0.989643
MMAR_0552	OTHER	0.019341	0.004315	0.000721	0.975622
MMAR_0551	OTHER	0.012093	0.008646	0.035288	0.943973
MMAR_0550	SP(Sec/SPI)	0.988963	0.004949	0.005542	0.000545	CS pos: 29-30. VSA-IS. Pr: 0.7506
MMAR_1880	OTHER	0.009468	0.037433	0.00181	0.951288
MMAR_4929	OTHER	0.03899	0.11637	0.003941	0.840698
MMAR_0568	OTHER	0.012927	0.01116	0.00253	0.973383
MMAR_4926	OTHER	0.025002	0.005216	0.001204	0.968578
MMAR_0567	TAT(Tat/SPI)	0.034774	0.959136	0.005844	0.000246	CS pos: 31-32. AGA-AP. Pr: 0.4115
MMAR_4925	OTHER	0.003922	0.002486	0.000377	0.993215
MMAR_0566	OTHER	0.021056	0.016543	0.003517	0.958884
MMAR_4928	OTHER	0.017734	0.002922	0.006115	0.973229
MMAR_0565	OTHER	0.22776	0.054081	0.026257	0.691902
MMAR_4927	OTHER	0.123091	0.034567	0.006588	0.835755
MMAR_1896	OTHER	0.054224	0.006268	0.008206	0.931302
MMAR_4922	OTHER	0.012531	0.005917	0.001295	0.980258
MMAR_1897	OTHER	0.041665	0.001939	0.012813	0.943583
MMAR_4921	OTHER	0.00742	0.001599	0.001637	0.989344
MMAR_1898	OTHER	0.026131	0.001472	0.008452	0.963946
MMAR_4924	OTHER	0.058127	0.007273	0.014362	0.920238
MMAR_0569	OTHER	0.015614	0.010343	0.002866	0.971177
MMAR_1899	OTHER	0.178197	0.01644	0.02253	0.782833
MMAR_4923	OTHER	0.006273	0.003976	0.00138	0.988371
MMAR_0560	OTHER	0.004999	0.000337	0.000469	0.994195
MMAR_1892	OTHER	0.003927	0.001831	0.000562	0.993681
MMAR_1893	OTHER	0.029948	0.003503	0.010518	0.956031
MMAR_1894	OTHER	0.017334	0.022798	0.00225	0.957618
MMAR_4920	OTHER	0.295243	0.039968	0.023475	0.641315
MMAR_1895	OTHER	0.021196	0.00228	0.001607	0.974917
MMAR_0564	OTHER	0.006469	0.004213	0.001399	0.987919
MMAR_0563	OTHER	0.008596	0.00055	0.000977	0.989877
MMAR_0562	OTHER	0.043032	0.00964	0.044604	0.902724
MMAR_1890	LIPO(Sec/SPII)	0.004119	0.29304	0.701916	0.000924	CS pos: 29-30. VSA-CG. Pr: 0.7026
MMAR_0561	OTHER	0.073043	0.009937	0.004011	0.91301
MMAR_1891	OTHER	0.011066	0.000802	0.001139	0.986994
MMAR_0535	OTHER	0.011654	0.001075	0.008329	0.978941
MMAR_1867	OTHER	0.01837	0.0011	0.008127	0.972403
MMAR_0534	OTHER	0.012261	0.000873	0.002742	0.984124
MMAR_1868	OTHER	0.027821	0.02859	0.002307	0.941282
MMAR_0533	OTHER	0.062981	0.052313	0.006858	0.877847
MMAR_1869	OTHER	0.006058	0.0009	0.00078	0.992261
MMAR_0532	OTHER	0.003206	0.000386	0.000305	0.996102
MMAR_0539	OTHER	0.202143	0.0271	0.021883	0.748874
MMAR_1863	OTHER	0.004405	0.000192	0.00051	0.994893
MMAR_0538	OTHER	0.20176	0.097467	0.020564	0.680209
MMAR_1864	OTHER	0.027317	0.000878	0.00466	0.967145
MMAR_0537	OTHER	0.058376	0.116535	0.007723	0.817366
MMAR_1865	OTHER	0.020038	0.004687	0.00145	0.973825
MMAR_0536	OTHER	0.008255	0.016465	0.001701	0.97358
MMAR_1866	OTHER	0.011855	0.001223	0.002208	0.984713
MMAR_1860	OTHER	0.011378	0.011764	0.000841	0.976018
MMAR_1861	OTHER	0.037516	0.123546	0.006794	0.832143
MMAR_1862	OTHER	0.014559	0.008302	0.005932	0.971207
MMAR_0531	OTHER	0.002499	0.000269	0.001099	0.996133
MMAR_0530	OTHER	0.021235	0.008629	0.002844	0.967292
MMAR_4908	OTHER	0.002003	0.000314	0.000706	0.996978
MMAR_4907	OTHER	0.051924	0.00971	0.010244	0.928121
MMAR_4909	OTHER	0.002433	0.000299	0.000615	0.996652
MMAR_0546	OTHER	0.052947	0.057586	0.005522	0.883944
MMAR_1878	OTHER	0.019939	0.000275	0.00248	0.977306
MMAR_4904	OTHER	0.014883	0.001766	0.003511	0.97984
MMAR_0545	OTHER	0.34247	0.080539	0.022513	0.554477
MMAR_1879	OTHER	0.038964	0.002768	0.021668	0.9366
MMAR_4903	OTHER	0.130567	0.010196	0.025719	0.833518
MMAR_0544	SP(Sec/SPI)	0.443013	0.279947	0.03298	0.244059	CS pos: 31-32. ASA-SP. Pr: 0.1740
MMAR_4906	OTHER	0.025582	0.007593	0.003388	0.963437
MMAR_0543	OTHER	0.026487	0.001509	0.003304	0.9687
MMAR_4905	OTHER	0.02063	0.002499	0.007103	0.969768
MMAR_1874	OTHER	0.015794	0.020683	0.001033	0.96249
MMAR_4900	SP(Sec/SPI)	0.87866	0.084571	0.009265	0.027505	CS pos: 42-43. AAA-EP. Pr: 0.7714
MMAR_0549	OTHER	0.023472	0.001965	0.002655	0.971908
MMAR_1875	OTHER	0.122782	0.007321	0.005387	0.86451
MMAR_0548	OTHER	0.022763	0.011712	0.00192	0.963605
MMAR_1876	OTHER	0.030551	0.027076	0.021872	0.920501
MMAR_4902	LIPO(Sec/SPII)	0.050674	0.198083	0.581813	0.16943	CS pos: 27-28. ALG-CT. Pr: 0.5760
MMAR_0547	OTHER	0.06728	0.007544	0.009695	0.915482
MMAR_1877	OTHER	0.154461	0.007363	0.094782	0.743394
MMAR_4901	OTHER	0.007799	0.000777	0.000681	0.990743
MMAR_1870	OTHER	0.054172	0.023492	0.140822	0.781514
MMAR_1871	OTHER	0.006213	0.004558	0.001237	0.987992
MMAR_1872	OTHER	0.006331	0.000624	0.001043	0.992002
MMAR_1873	OTHER	0.014312	0.000738	0.002119	0.982831
MMAR_0542	OTHER	0.010789	0.005241	0.002676	0.981295
MMAR_0541	OTHER	0.042468	0.013978	0.013021	0.930532
MMAR_0540	OTHER	0.164055	0.004788	0.060375	0.770782
MMAR_0519	OTHER	0.044045	0.024821	0.007183	0.92395
MMAR_0518	OTHER	0.03564	0.035049	0.000672	0.92864
MMAR_1849	OTHER	0.250661	0.108029	0.012689	0.628621
MMAR_0513	OTHER	0.002434	0.000421	0.000497	0.996648
MMAR_1845	OTHER	0.069732	0.217513	0.014984	0.697771
MMAR_0512	OTHER	0.021214	0.002091	0.004013	0.972682
MMAR_1846	OTHER	0.013956	0.001272	0.017275	0.967496
MMAR_0511	OTHER	0.098327	0.110328	0.007357	0.783987
MMAR_1847	OTHER	0.155805	0.07201	0.011074	0.76111
MMAR_0510	OTHER	0.049693	0.001782	0.002398	0.946127
MMAR_1848	LIPO(Sec/SPII)	0.122966	0.033478	0.798064	0.045492	CS pos: 30-31. VIG-CW. Pr: 0.7692
MMAR_0517	OTHER	0.013191	0.000587	0.020077	0.966145
MMAR_1841	OTHER	0.003309	0.005889	0.001118	0.989684
MMAR_0516	OTHER	0.009806	0.000959	0.001069	0.988166
MMAR_1842	OTHER	0.034276	0.00938	0.003787	0.952557
MMAR_0515	OTHER	0.015821	0.00594	0.002631	0.975608
MMAR_1843	OTHER	0.035853	0.006984	0.005034	0.952129
MMAR_0514	OTHER	0.049153	0.037751	0.004855	0.90824
MMAR_1844	OTHER	0.016036	0.011577	0.001646	0.970742
MMAR_1840	LIPO(Sec/SPII)	0.028071	0.010076	0.959991	0.001862	CS pos: 24-25. LPG-CT. Pr: 0.4555
MMAR_0529	OTHER	0.00668	0.002958	0.001208	0.989154
MMAR_0524	OTHER	0.006564	0.001522	0.000601	0.991313
MMAR_1856	OTHER	0.016559	0.022699	0.004937	0.955805
MMAR_0523	OTHER	0.0173	0.008082	0.002429	0.972189
MMAR_1857	OTHER	0.008009	0.001833	0.001037	0.989121
MMAR_0522	OTHER	0.00719	0.001708	0.001412	0.98969
MMAR_1858	OTHER	0.005497	0.00012	0.000316	0.994067
MMAR_0521	OTHER	0.011389	0.000684	0.008335	0.979592
MMAR_1859	OTHER	0.032321	0.010426	0.000946	0.956307
MMAR_0528	OTHER	0.00442	0.001025	0.000623	0.993932
MMAR_1852	OTHER	0.010414	0.007806	0.003276	0.978505
MMAR_0527	OTHER	0.003956	0.000521	0.000856	0.994667
MMAR_1853	OTHER	0.006335	0.00066	0.000961	0.992044
MMAR_0526	OTHER	0.006558	0.000162	0.002996	0.990285
MMAR_1854	OTHER	0.028624	0.010858	0.002617	0.957902
MMAR_0525	TAT(Tat/SPI)	0.003062	0.691776	0.304768	0.000394	CS pos: 37-38. GTA-DT. Pr: 0.2148
MMAR_1855	OTHER	0.016002	0.001241	0.003874	0.978883
MMAR_1850	OTHER	0.327932	0.171246	0.018714	0.482108
MMAR_1851	OTHER	0.208181	0.16119	0.014722	0.615906
MMAR_0520	OTHER	0.014618	0.01123	0.002352	0.9718
MMAR_1827	OTHER	0.004804	0.002247	0.001514	0.991435
MMAR_1828	OTHER	0.008499	0.002601	0.006796	0.982104
MMAR_1829	SP(Sec/SPI)	0.495603	0.28421	0.020957	0.19923	CS pos: 42-43. AAA-AG. Pr: 0.1292
MMAR_1823	SP(Sec/SPI)	0.981639	0.012239	0.004842	0.00128	CS pos: 23-24. ASA-AP. Pr: 0.8495
MMAR_1824	OTHER	0.020548	0.019615	0.004719	0.955118
MMAR_1825	OTHER	0.170904	0.01799	0.04851	0.762596
MMAR_1826	OTHER	0.02191	0.003061	0.00319	0.971839
MMAR_1820	OTHER	0.082489	0.026248	0.09187	0.799393
MMAR_1821	OTHER	0.007279	0.010106	0.001	0.981615
MMAR_1822	OTHER	0.039704	0.062736	0.008792	0.888768
MMAR_4099	OTHER	0.097945	0.002486	0.088517	0.811052
MMAR_4096	OTHER	0.022479	0.018748	0.002737	0.956036
MMAR_4095	OTHER	0.082684	0.120949	0.006695	0.789673
MMAR_4098	OTHER	0.006107	0.00089	0.000985	0.992018
MMAR_4097	OTHER	0.017194	0.005272	0.003033	0.974501
MMAR_4092	OTHER	0.088971	0.057294	0.070448	0.783287
MMAR_4091	OTHER	0.004081	0.000177	0.002547	0.993195
MMAR_4094	OTHER	0.002681	0.000455	0.005046	0.991818
[truncated: 4,115 more rows]

## Sheet: MmaR-SecretomeP
SecretomeP 2.0 Prediction for M. marinum Secreted Proteins
[truncated: 5,443 more rows]

[truncated: 4 more sheets: Mbb-Signal P, Mbb-SecretomeP, Mav-Signal P, Mav-SecretomeP]
