# Supplementary material for: A conserved mycobacterial nucleomodulin hijacks the host COMPASS complex to reprogram pro-inflammatory transcription and promote intracellular survival
Source: eLife. 2026 Mar 31;14:RP107677. doi: 10.7554/eLife.107677 (PMC13038263; doi:10.7554/eLife.107677)
Supplement: Supplementary file 2. [file elife-107677-supp2.xlsx]

## Sheet: Sheet1
Five Mycobacterium species with conserved nucleomodulins
Target gene	NLS	Prediction	CS Position	Annotion
Rv2585c	APRRRRHTRIAG	LIPO(Sec/SPII)	CS pos: 30-31. LTA-CS. Pr: 0.8138	lipoprotein
Rv1274	RRK	LIPO(Sec/SPII)	CS pos: 24-25. VAG-CS. Pr: 0.9975	lipoprotein LprB
Rv2200c	ERKR	LIPO(Sec/SPII)	CS pos: 46-47. VSG-CS. Pr: 0.8475	cytochrome C oxidase subunit II
Rv0583c	KHFTAAVATVALSLALAGCSFNIKTD	LIPO(Sec/SPII)	CS pos: 19-20. LAG-CS. Pr: 0.9995	lipoprotein LpqN
Rv3390	RTPVRKACTVLAVLAATLLLGACGGPTQPRSIT	LIPO(Sec/SPII)	CS pos: 25-26. LGA-CG. Pr: 0.9973	lipoprotein LpqD
Rv2171	RVRASITISPDDLVSGEIIAAAKPKNSKDT	LIPO(Sec/SPII)	CS pos: 24-25. ATG-CL. Pr: 0.8641	lipoprotein LppM
Rv2672	SKRVMWQGIGHGASIYSSCAVPPLVAYLD	LIPO(Sec/SPII)	CS pos: 29-30. LAA-CV. Pr: 0.5786	protease
Rv1411c	SKPSGGPLPDAKPLVEEATAQTKALK	LIPO(Sec/SPII)	CS pos: 26-27. VAG-CS. Pr: 0.9989	lipoprotein LprG
Rv1857	IAVLKRTSQPALARQFVAMVTAAAGRRILDQS	LIPO(Sec/SPII)	CS pos: 21-22. LVA-CG. Pr: 0.9888	molybdate ABC transporter substrate-binding lipoprotein ModA
Rv0679c	NNKIAFDRIDERLVVVGLDNTVTYKNGDPT	LIPO(Sec/SPII)	CS pos: 32-33. LAG-CS. Pr: 0.9255	hypothetical protein
Rv2224c	RLSRRDKIARMLLIWAALAAVALVLVGCIRVVG	LIPO(Sec/SPII)	CS pos: 30-31. LVG-CI. Pr: 0.9100	carboxylesterase A
Rv1064c	RGGSSKAGRSSSVAGTLPAGVVGVSPAGVTTR	LIPO(Sec/SPII)	CS pos: 25-26. VAG-CS. Pr: 0.9834	lipoprotein LpqV
Rv1275	RRVLVGAAALITALLVLTGCTKSISGT	LIPO(Sec/SPII)	CS pos: 20-21. LTG-CT. Pr: 0.9960	lipoprotein LprC
Rv1881c	PRKAARLTIDGVTHTTRPATCSQEHSYRTI	LIPO(Sec/SPII)	CS pos: 21-22. LSA-CG. Pr: 0.9922	lipoprotein LppE
Rv0418	VNKSRMMPAVLAVAVVVAFLTTGCIRWST	LIPO(Sec/SPII)	CS pos: 24-25. TTG-CI. Pr: 0.9886	lipoprotein aminopeptidase LpqL
Rv0432	IPPERYVQVNGTPGPDETTLTTGDAGKRVAC	LIPO(Sec/SPII)	CS pos: 32-33. LSA-CS. Pr: 0.9094	superoxide dismutase
Rv2518c	RTRVRRAWLTALMMTAVMIGAVACGSGRGPAP	LIPO(Sec/SPII)	CS pos: 34-35. AVA-CG. Pr: 0.9842	L%2CD-transpeptidase LdtB
Rv0671	DNRRVVLLTVDDAGHRWPSFATQTLWRFFA	LIPO(Sec/SPII)	CS pos: 17-18. FAG-CS. Pr: 0.9766	lipoprotein LpqP
Rv0173	non-classical	LIPO(Sec/SPII)	CS pos: 30-31. LSS-CG. Pr: 0.9922	Mce family lipoprotein LprK
Rv1006	non-classical	LIPO(Sec/SPII)	CS pos: 26-27. LNG-CS. Pr: 0.9521	hypothetical protein
Rv2116	non-classical	LIPO(Sec/SPII)	CS pos: 22-23. LSG-CS. Pr: 0.9982	lipoprotein LppK
Rv1235	non-classical	LIPO(Sec/SPII)	CS pos: 25-26. AAA-CG. Pr: 0.9510	trehalose ABC transporter substrate-binding lipoprotein LpqY
Rv1280c	non-classical	LIPO(Sec/SPII)	CS pos: 51-52. LTG-CS. Pr: 0.7117	oligopeptide ABC transporter substrate-binding lipoprotein OppA
Rv2905	non-classical	LIPO(Sec/SPII)	CS pos: 22-23. VAG-CE. Pr: 0.9904	lipoprotein LppW
Rv0411c	non-classical	LIPO(Sec/SPII)	CS pos: 25-26. LAS-CG. Pr: 0.9760	glutamine-binding lipoprotein GlnH
Rv0526	non-classical	LIPO(Sec/SPII)	CS pos: 30-31. LTG-CS. Pr: 0.9296	thioredoxin
Rv1166	non-classical	LIPO(Sec/SPII)	CS pos: 27-28. LAG-CT. Pr: 0.5974	monoacyl phosphatidylinositol tetramannoside-binding protein LpqW
Rv0932c	non-classical	LIPO(Sec/SPII)	CS pos: 22-23. LTA-CG. Pr: 0.9956	phosphate ABC transporter substrate-binding lipoprotein PstS
Rv3759c	non-classical	LIPO(Sec/SPII)	CS pos: 26-27. VAS-CA. Pr: 0.7897	glycine betaine/carnitine/choline/L-proline ABC transporter substrate-binding lipoprotein ProX
Rv0928	non-classical	LIPO(Sec/SPII)	CS pos: 22-23. LSA-CG. Pr: 0.9973	phosphate ABC transporter substrate-binding lipoprotein PstS
Rv2270	non-classical	LIPO(Sec/SPII)	CS pos: 20-21. LAA-CS. Pr: 0.9978	lipoprotein LppN
Rv3576	non-classical	LIPO(Sec/SPII)	CS pos: 20-21. AAG-CT. Pr: 0.8157	lipoprotein LppH
Rv0419	non-classical	LIPO(Sec/SPII)	CS pos: 38-39. IAG-CT. Pr: 0.9486	lipoprotein peptidase LpqM
Rv1244	non-classical	LIPO(Sec/SPII)	CS pos: 22-23. VAG-CS. Pr: 0.9884	lipoprotein LpqZ
Rv3044	non-classical	LIPO(Sec/SPII)	CS pos: 19-20. SSG-CG. Pr: 0.9930	FeIII-dicitrate-binding periplasmic lipoprotein
Rv1252c	non-classical	LIPO(Sec/SPII)	CS pos: 28-29. LTG-CG. Pr: 0.9894	lipoprotein LprE
Rv0237	non-classical	LIPO(Sec/SPII)	CS pos: 19-20. VVA-CS. Pr: 0.9818	lipoprotein LpqI
Rv0838	non-classical	LIPO(Sec/SPII)	CS pos: 22-23. ACA-CD. Pr: 0.5949	lipoprotein LpqR
Rv2864c	non-classical	LIPO(Sec/SPII)	CS pos: 24-25. MSG-CT. Pr: 0.9872	penicillin-binding lipoprotein
Rv0344c	non-classical	LIPO(Sec/SPII)	CS pos: 22-23. VAG-CN. Pr: 0.9982	lipoprotein LpqJ
Rv1690	non-classical	LIPO(Sec/SPII)	CS pos: 34-35. AAS-CA. Pr: 0.6155	lipoprotein LprJ
Rv2403c	non-classical	LIPO(Sec/SPII)	CS pos: 19-20. AAG-CT. Pr: 0.9947	lipoprotein LppR
Rv3495c	non-classical	LIPO(Sec/SPII)	CS pos: 20-21. LAG-CQ. Pr: 0.9966	Mce family lipoprotein LprN
Rv3584	non-classical	LIPO(Sec/SPII)	CS pos: 29-30. LSG-CG. Pr: 0.9944	lipoprotein LpqE
Rv1022	non-classical	LIPO(Sec/SPII)	CS pos: 23-24. ASS-CT. Pr: 0.9772	lipoprotein LpqU
Rv3298c	non-classical	LIPO(Sec/SPII)	CS pos: 18-19. LAG-CG. Pr: 0.9910	esterase LpqC
Rv0518	non-classical	LIPO(Sec/SPII)	CS pos: 23-24. NPG-CP. Pr: 0.4583	hypothetical protein
Rv2046	non-classical	LIPO(Sec/SPII)	CS pos: 15-16. IAG-CS. Pr: 0.9971	lipoprotein LppI
Rv2400c	non-classical	LIPO(Sec/SPII)	CS pos: 37-38. GVG-CH. Pr: 0.7570	sulfate ABC transporter substrate-binding lipoprotein SubI
Rv2345	RNRRRRADE	SP(Sec/SPI)	CS pos: 26-27. AGA-QP. Pr: 0.9665	transmembrane protein
Rv1477	RRKF	SP(Sec/SPI)	CS pos: 39-40. ATA-DP. Pr: 0.8630	peptidoglycan endopeptidase RipA
Rv0674	AKRRD	SP(Sec/SPI)	CS pos: 24-25. ATA-SE. Pr: 0.4730	hypothetical protein
Rv0203	RRR	SP(Sec/SPI)	CS pos: 36-37. ATG-AS. Pr: 0.3651	hypothetical protein
Rv1860	RRK	SP(Sec/SPI)	CS pos: 39-40. ANA-DP. Pr: 0.6809	hypothetical protein
Rv2721c	FGLRRRRRGYD	SP(Sec/SPI)	CS pos: 35-36. VAA-SP. Pr: 0.6864	hypothetical protein
Rv0125	SRRRS	SP(Sec/SPI)	CS pos: 32-33. AQA-AP. Pr: 0.7861	serine protease PepA
Rv0291	RRRR	SP(Sec/SPI)	CS pos: 25-26. AWA-IG. Pr: 0.8527	membrane-anchored mycosin MycP
Rv2223c	RRRP	SP(Sec/SPI)	CS pos: 34-35. AGA-TE. Pr: 0.7413	carboxylesterase B
Rv3212	GGTVATGDGRQVDGRDPATG	SP(Sec/SPI)	CS pos: 37-38. ARA-TI. Pr: 0.5557	hypothetical protein
Rv3491	QPKLSKQPFSLQLIGPPPSPVQRYPLYCNNIA	SP(Sec/SPI)	CS pos: 31-32. ARA-LG. Pr: 0.9517	hypothetical protein
Rv1157c	RRLTNTEHRENTTVASTWSVCKGLAAV	SP(Sec/SPI)	CS pos: 44-45. AAA-DP. Pr: 0.7950	hypothetical protein
Rv2781c	KPIRAAAVQADDPHGTNLWAGSAHRKTRPGP	SP(Sec/SPI)	CS pos: 27-28. ALA-AA. Pr: 0.4808	oxidoreductase
Rv3449	PVPRRSTPGPSDRRALHTAFAGAAICLLAL	SP(Sec/SPI)	CS pos: 28-29. AHA-VS. Pr: 0.9574	membrane-anchored mycosin
Rv1273c	RQHIRPYRRLVAMLMMLQLVSTLASLYLPTVNAAI	SP(Sec/SPI)	CS pos: 39-40. VNA-AI. Pr: 0.8015	drug ABC transporter ATP-binding protein
Rv0477	RQPGKPSWNLEPWRPVVDDSEMLASGCNPGSP	SP(Sec/SPI)	CS pos: 23-24. AQA-DP. Pr: 0.9443	hypothetical protein
Rv2911	GLVKEGGPTYWDQAATLFDWGFALNPQASV	SP(Sec/SPI)	CS pos: 25-26. AWA-DA. Pr: 0.7800	penicillin-binding protein DacB2
Rv0584	RARRLRRALAALLAVAGLFVPFIVGVPTAYDGE	SP(Sec/SPI)	CS pos: 30-31. PTA-YD. Pr: 0.3560	glycosidase
Rv1804c	IASGKAVCALVESGESGLQVVNELRTRNPGFS	SP(Sec/SPI)	CS pos: 22-23. AHA-GP. Pr: 0.9397	hypothetical protein
Rv0559c	WLAKISCERLSRGVDGDAYKSATFLQRNLP	SP(Sec/SPI)	CS pos: 25-26. AQA-DD. Pr: 0.9919	hypothetical protein
Rv1891	PCPKPQAAAQSPDGLPMLCLGARGWQPGWFT	SP(Sec/SPI)	CS pos: 24-25. AGA-DP. Pr: 0.7187	hypothetical protein
Rv0309	GVNKAKVPGKGSAFFFHTTDGGPTAGCVAID	SP(Sec/SPI)	CS pos: 27-28. SLA-VV. Pr: 0.6174	hypothetical protein
Rv1271c	KKLASGETGTEIAEEVLSQTNLTTKQAAY	SP(Sec/SPI)	CS pos: 34-35. AGA-NT. Pr: 0.5204	hypothetical protein
Rv1435c	KDALTDPAPAGGPVPGQPVLPGPSASAP	SP(Sec/SPI)	CS pos: 33-34. AAA-DP. Pr: 0.9250	hypothetical protein
Rv0451c	FTVHRIRGFFGSENRPSYSDTNLENSKPFNPK	SP(Sec/SPI)	CS pos: 27-28. IRG-FF. Pr: 0.1509	membrane protein MmpS4
Rv2878c	RLVSPIKAFADGIVAVAIAVVLMFGLANTPRAV	SP(Sec/SPI)	CS pos: 37-38. AVA-AD. Pr: 0.7385	soluble secreted antigen Mpt53
Rv1885c	non-classical	SP(Sec/SPI)	CS pos: 33-34. ARA-DG. Pr: 0.9577	chorismate mutase
Rv1566c	non-classical	SP(Sec/SPI)	CS pos: 30-31. AAA-DP. Pr: 0.5576	hypothetical protein
Rv2972c	non-classical	SP(Sec/SPI)	CS pos: 32-33. RHA-DE. Pr: 0.3142	hypothetical protein
Rv0016c	non-classical	SP(Sec/SPI)	CS pos: 30-31. VFT-AD. Pr: 0.6251	penicillin-binding protein PbpA
Rv3036c	non-classical	SP(Sec/SPI)	CS pos: 22-23. AAG-AP. Pr: 0.5341	hypothetical protein
Rv0937c	non-classical	SP(Sec/SPI)	CS pos: 22-23. VYS-AT. Pr: 0.4011	non-homologous end joining protein Ku
Rv0867c	non-classical	SP(Sec/SPI)	CS pos: 38-39. ATA-AT. Pr: 0.6552	resuscitation-promoting factor RpfA
Rv1796	non-classical	SP(Sec/SPI)	CS pos: 39-40. AYA-IS. Pr: 0.9653	membrane-anchored mycosin MycP
Rv3452	non-classical	SP(Sec/SPI)	CS pos: 45-46. ASA-GC. Pr: 0.8068	cutinase
Rv3627c	non-classical	SP(Sec/SPI)	CS pos: 30-31. AAA-LV. Pr: 0.1131	hypothetical protein
Rv0040c	non-classical	SP(Sec/SPI)	CS pos: 32-33. ASA-DP. Pr: 0.8223	hypothetical protein
Rv1810	non-classical	SP(Sec/SPI)	CS pos: 35-36. GKA-DP. Pr: 0.7731	hypothetical protein
Rv3499c	non-classical	SP(Sec/SPI)	CS pos: 36-37. TAA-FT. Pr: 0.4591	Mce family protein Mce4A
Rv1906c	non-classical	SP(Sec/SPI)	CS pos: 32-33. AGA-DP. Pr: 0.6566	hypothetical protein
Rv2216	non-classical	SP(Sec/SPI)	CS pos: 25-26. LRA-AD. Pr: 0.5023	epimerase family protein
Rv0398c	non-classical	SP(Sec/SPI)	CS pos: 28-29. AGA-EP. Pr: 0.7152	hypothetical protein
Rv1174c	non-classical	SP(Sec/SPI)	CS pos: 28-29. ASA-DP. Pr: 0.8121	low molecular weight T-cell antigen
Rv1230c	non-classical	SP(Sec/SPI)	CS pos: 46-47. GSA-AP. Pr: 0.3316	membrane protein
Rv3267	non-classical	SP(Sec/SPI)	CS pos: 38-39. VRS-FE. Pr: 0.5549	hypothetical protein
Rv3572	non-classical	SP(Sec/SPI)	CS pos: 24-25. TSA-AG. Pr: 0.4773	hypothetical protein
Rv1268c	non-classical	SP(Sec/SPI)	CS pos: 32-33. ADA-AA. Pr: 0.7649	hypothetical protein
Rv1096	non-classical	SP(Sec/SPI)	CS pos: 38-39. TRA-EN. Pr: 0.7948	glycosyl hydrolase
Rv2576c	non-classical	SP(Sec/SPI)	CS pos: 45-46. ARA-DP. Pr: 0.7821	membrane protein
Rv3330	non-classical	SP(Sec/SPI)	CS pos: 28-29. AAG-EP. Pr: 0.3150	penicillin-binding protein DacB
Rv3354	non-classical	SP(Sec/SPI)	CS pos: 32-33. AQA-NP. Pr: 0.9197	hypothetical protein
Rv3312A	non-classical	SP(Sec/SPI)	CS pos: 31-32. SAA-QT. Pr: 0.4825	pilin
Rv0680c	non-classical	SP(Sec/SPI)	CS pos: 30-31. AHA-KN. Pr: 0.9653	transmembrane protein
Rv1926c	non-classical	SP(Sec/SPI)	CS pos: 29-30. ALA-AY. Pr: 0.9447	immunogenic protein Mpt63
Rv3451	non-classical	SP(Sec/SPI)	CS pos: 41-42. AFA-DG. Pr: 0.9010	cutinase
Rv2376c	non-classical	SP(Sec/SPI)	CS pos: 29-30. IMA-GG. Pr: 0.5835	low molecular weight antigen MTB12
Rv1352	non-classical	SP(Sec/SPI)	CS pos: 30-31. ARA-ET. Pr: 0.9810	hypothetical protein
Rv1433	non-classical	SP(Sec/SPI)	CS pos: 30-31. VAA-KQ. Pr: 0.2942	hypothetical protein
Rv1815	non-classical	SP(Sec/SPI)	CS pos: 27-28. ASA-DP. Pr: 0.8556	hypothetical protein
Rv1478	non-classical	SP(Sec/SPI)	CS pos: 31-32. ADA-EP. Pr: 0.9299	peptidoglycan endopeptidase RipB
Rv2577	RRRFLTTGAAAVVGTGV TSIKATYYAVTGPFGGLTVIDQFTLTKPRG	TAT(Tat/SPI)	CS pos: 52-53. GPA-VW. Pr: 0.4815	hypothetical protein
Rv1075c	QTGKRIRLS RDALTEKLDIPIHETPSRPGTATLEPGHTRHSM	TAT(Tat/SPI)	CS pos: 36-37. THA-RT. Pr: 0.4595	hypothetical protein
Rv0519c	MLRRGCAGNTDRRGIMTPMADLTRRALLRW	TAT(Tat/SPI)	CS pos: 55-56. PQA-AP. Pr: 0.3596	membrane protein
Rv0846c	FDKRRFSRRGFLGAGIASGFALAACASKPT PKQKMRAVLVADNPGVWVMHCHNNYHQVAG	TAT(Tat/SPI)	CS pos: 44-45. SGA-AG. Pr: 0.2326	oxidase
Rv1616	RRRHGDLALPIPVMIAVAVAVIAWTVLRN	TAT(Tat/SPI)	CS pos: 36-37. SNS-LY. Pr: 0.3590	hypothetical protein
Rv0945	EREPGRAAVPWWPWAPLVRLMWVLPPRLTRRF	TAT(Tat/SPI)	CS pos: 28-29. SFA-AQ. Pr: 0.6548	oxidoreductase
Rv1291c	RAIKDAHAVCDALDEGHSAKAVIKAVAKAT	TAT(Tat/SPI)	CS pos: 33-34. ASA-SS. Pr: 0.8053	hypothetical protein
Rv2041c	non-classical	TAT(Tat/SPI)	CS pos: 32-33. CAA-DD. Pr: 0.5384	sugar ABC transporter substrate-binding lipoprotein
Rv2525c	non-classical	TAT(Tat/SPI)	CS pos: 35-36. ASA-GS. Pr: 0.6051	hypothetical protein
Rv0265c	non-classical	TAT(Tat/SPI)	CS pos: 40-41. GAA-VT. Pr: 0.1468	iron ABC transporter substrate-binding lipoprotein
Rv0315	non-classical	TAT(Tat/SPI)	CS pos: 31-32. AWA-DP. Pr: 0.7869	beta-1%2C3-glucanase
Rv0063	non-classical	TAT(Tat/SPI)	CS pos: 31-32. ATA-DP. Pr: 0.7287	oxidoreductase
Rv0774c	non-classical	TAT(Tat/SPI)	CS pos: 41-42. SHA-AP. Pr: 0.5047	hypothetical protein
Rv3069	non-classical	TAT(Tat/SPI)	CS pos: 30-31. ALA-IP. Pr: 0.5212	fluoride ion transporter CrcB
Rv0906	non-classical	TAT(Tat/SPI)	CS pos: 33-34. ALG-AD. Pr: 0.3862	hypothetical protein
Rv0703	GKRKRTRTGYGKRKSTKRA	OTHER		50S ribosomal protein L23
Rv0982	VRRRRNDILFDVEVIGWQVYG	OTHER		two component histidine-protein kinase/phosphatase MprB
Rv2700	FRRRN	OTHER		hypothetical protein
Rv2903c	RPAKRSTLREF	OTHER		signal peptidase
Rv0224c	DVFARRATLRRSLRLLADFRYEQRDPARFYRTLAADT	OTHER		methyltransferase
Rv2961	non-classical	OTHER		transposase
Rv2274A	non-classical	OTHER		antitoxin MazE8
Rv2434c	non-classical	OTHER		transmembrane protein
Rv0546c	non-classical	OTHER		hypothetical protein
Rv3289c	non-classical	OTHER		transmembrane protein
Rv1150	non-classical	OTHER		pseudogene
