# Supplementary material for: A conserved mycobacterial nucleomodulin hijacks the host COMPASS complex to reprogram pro-inflammatory transcription and promote intracellular survival
Source: eLife. 2026 Mar 31;14:RP107677. doi: 10.7554/eLife.107677 (PMC13038263; doi:10.7554/eLife.107677)
Supplement: Supplementary file 4. [file elife-107677-supp4.xlsx]

## Sheet: Prokaryotes
Primers used in this study (ORF)
Plasmid	Homologous recombination-ready fragments	sequence (5'-3')	sequence primer
pEGFP	MgdE	F	GAACCGTCAGATCCGCTAGCATGCCACGGCGTTCCACGAT
		R	GACTGCAGAATTCGAAGCTTCCCACCGGTCGGCACGGCCC
	MgdEΔNLS1-L	F	GAACCGTCAGATCCGCTAGCATGCCACGGCGTTCCACGAT
		R	GATGGCTTTGGTGCTCAGGCCGGTCTGCTCGGCGAG
	MgdEΔNLS1-R	F	CTCGCCGAGCAGACCGGCCTGAGCACCAAAGCCATC
		R	GACTGCAGAATTCGAAGCTTCCCACCGGTCGGCACGGCCC
	MgdEΔNLS2	F	GAACCGTCAGATCCGCTAGCATGCCACGGCGTTCCACGAT
		R	GACTGCAGAATTCGAAGCTTCCCACCGGTCGGCACGGCCCGGGCCGGCGACATCATGCTGTGTCG
	MgdEΔNLS1-2-L	F	GAACCGTCAGATCCGCTAGCATGCCACGGCGTTCCACGAT
		R	GATGGCTTTGGTGCTCAGGCCGGTCTGCTCGGCGAG
	MgdEΔNLS1-2-R	F	CTCGCCGAGCAGACCGGCCTGAGCACCAAAGCCATC
		R	GACTGCAGAATTCGAAGCTTCCCACCGGTCGGCACGGCCCGGGCCGGCGACATCATGCTGTGTCG
	MgdE-D244AH247A-L	F	GAACCGTCAGATCCGCTAGCATGCCACGGCGTTCCACGAT
		R	GTACGCGGGCGCCGACGGGGCGTAGCGGGCGGCGGAGAACATCAGCTC
	MgdE-D244AH247A-R	F	GAGCTGATGTTCTCCGCCGCCCGCTACGCCCCGTCGGCGCCCGCGTAC
		R	GACTGCAGAATTCGAAGCTTCCCACCGGTCGGCACGGCCC
	Rv0519c	F	GAACCGTCAGATCCGCTAGCATGCTACGGCGTGGCTGTGC
		R	GACTGCAGAATTCGAAGCTTGGACGCCATCCAAGCCAGTT
	Rv0846c	F	GAACCGTCAGATCCGCTAGCATGCCCGAGCTGGCCACGAG
		R	GACTGCAGAATTCGAAGCTTCAGAATGTAGTCCAGGCGGG
	Rv0945	F	GAACCGTCAGATCCGCTAGCATGCTCACCGGAGTGACTCG
		R	GACTGCAGAATTCGAAGCTTGGCGAAGCGTCTGGTCAGCC
	Rv1291c	F	GAACCGTCAGATCCGCTAGCATGTTCACTCGCCGTTTCGC
		R	GACTGCAGAATTCGAAGCTTGCTCGAGGTCACGTACTGCG
	Rv1616	F	GAACCGTCAGATCCGCTAGCATGGAAGCTAGCGGGCGTCA
		R	GACTGCAGAATTCGAAGCTTTCCGCTGATCGTCGGCACTA
	Rv2577	F	GAACCGTCAGATCCGCTAGCATGGGCGCCGATCTGAAGCA
		R	GACTGCAGAATTCGAAGCTTTCCGCCGCGCGGCTTGGTCA
	Rv1988	F	GAACCGTCAGATCCGCTAGCATGTCCGCCCTCGGACGGTC
		R	GACTGCAGAATTCGAAGCTTCCGCCCCTGCCAGTCACCGC
pGBKT7	MgdE	F	CTCAGAGGAGGACCTGCATATGATGCGCACGGTAATTCCCAAATCCT
		R	GCCGCTGCAGGTCGACGGATCCCTACCCACCGGTCGGCACGGCC
	MgdE-S80A-L	F	CTCAGAGGAGGACCTGCATATGATGCGCACGGTAATTCCCAAATCCT
		R	GCCGTATCCCGTCGCCGTCGCGTCACCAAAGATCATCAG
	MgdE-S80A-R	F	CTGATGATCTTTGGTGACGCGACGGCGACGGGATACGGC
		R	GCCGCTGCAGGTCGACGGATCCCTACCCACCGGTCGGCACGGCC
	MgdE-D244A-L	F	CTCAGAGGAGGACCTGCATATGATGCGCACGGTAATTCCCAAATCCT
		R	CGCCGACGGGTGGTAGCGGGCGGCGGAGAACATCAGCTC
	MgdE-D244A-R	F	GAGCTGATGTTCTCCGCCGCCCGCTACCACCCGTCGGCG
		R	GCCGCTGCAGGTCGACGGATCCCTACCCACCGGTCGGCACGGCC
	MgdE-H247A-L	F	CTCAGAGGAGGACCTGCATATGATGCGCACGGTAATTCCCAAATCCT
		R	GTACGCGGGCGCCGACGGGGCGTAGCGGTCGGCGGAGAA
	MgdE-H247A-R	F	TTCTCCGCCGACCGCTACGCCCCGTCGGCGCCCGCGTAC
		R	GCCGCTGCAGGTCGACGGATCCCTACCCACCGGTCGGCACGGCC
	MgdE-S80AD244A-L	F	CTCAGAGGAGGACCTGCATATGATGCGCACGGTAATTCCCAAATCCT
		R	GCCGTATCCCGTCGCCGTCGCGTCACCAAAGATCATCAG
	MgdE-S80AD244A-M	F	CTGATGATCTTTGGTGACGCGACGGCGACGGGATACGGC
		R	CGCCGACGGGTGGTAGCGGGCGGCGGAGAACATCAGCTC
	MgdE-S80AD244A-R	F	GAGCTGATGTTCTCCGCCGCCCGCTACCACCCGTCGGCG
		R	GCCGCTGCAGGTCGACGGATCCCTACCCACCGGTCGGCACGGCC
	MgdE-S80AH247A-L	F	CTCAGAGGAGGACCTGCATATGATGCGCACGGTAATTCCCAAATCCT
		R	GCCGTATCCCGTCGCCGTCGCGTCACCAAAGATCATCAG
	MgdE-S80AH247A-M	F	CTGATGATCTTTGGTGACGCGACGGCGACGGGATACGGC
		R	GTACGCGGGCGCCGACGGGGCGTAGCGGTCGGCGGAGAA
	MgdE-S80AH247A-R	F	TTCTCCGCCGACCGCTACGCCCCGTCGGCGCCCGCGTAC
		R	GCCGCTGCAGGTCGACGGATCCCTACCCACCGGTCGGCACGGCC
	MgdE-D244AH247A-L	F	CTCAGAGGAGGACCTGCATATGATGCGCACGGTAATTCCCAAATCCT
		R	TTCTCCGCCGACCGCTACGCCCCGTCGGCGCCCGCGTAC
	MgdE-D244AH247A-R	F	TTCTCCGCCGACCGCTACGCCCCGTCGGCGCCCGCGTAC
		R	GCCGCTGCAGGTCGACGGATCCCTACCCACCGGTCGGCACGGCC
pGADT7	pGADT7-ASH2L	F	CGTACCAGATTACGCTCATATGATGGCGGCGGCAGGAGCAGGAC
		R	GCAGCTCGAGCTCGATGGATCCTCAGGGTTCCCATGGGGGACTG
	pGADT7-WDR5	F	CGTACCAGATTACGCTCATATGATGGCAACCAAGGAGTCAAGAG
		R	GCAGCTCGAGCTCGATGGATCCTTAGTGGTTACTCATCCACAGT
	pGADT7-RbBP5	F	CGTACCAGATTACGCTCATATGATGAACCTCGAGTTGCTGGAGT
		R	GCAGCTCGAGCTCGATGGATCCTCATAACAGTTCTGAGATTGCT
	pGADT7-DPY30	F	CGTACCAGATTACGCTCATATGATGGAGCCAGAGCAGATGCTGG
		R	GCAGCTCGAGCTCGATGGATCCTCAGTTTCGATCTTCAAACTGT
pCAGGS-Flag	MgdE-Flag	F	AATTGCCACCATGGAATTCGTGCCACGGCGTTCCACGA
		R	CTACTTGTCATCGTCGTCCTTGTAATCGGTACCCCCACCGGTCGGCACGGCCC
	MgdE-S80A-Flag-L	F	AATTGCCACCATGGAATTCGTGCCACGGCGTTCCACGA
		R	GCCGTATCCCGTCGCCGTCGCGTCACCAAAGATCATCAG
	MgdE-S80A-Flag-R	F	CTGATGATCTTTGGTGACGCGACGGCGACGGGATACGGC
		R	CTACTTGTCATCGTCGTCCTTGTAATCGGTACCCCCACCGGTCGGCACGGCCC
	MgdE-D244-Flag-L	F	AATTGCCACCATGGAATTCGTGCCACGGCGTTCCACGA
		R	CGCCGACGGGTGGTAGCGGGCGGCGGAGAACATCAGCTC
	MgdE-D244-Flag-R	F	GAGCTGATGTTCTCCGCCGCCCGCTACCACCCGTCGGCG
		R	CTACTTGTCATCGTCGTCCTTGTAATCGGTACCCCCACCGGTCGGCACGGCCC
	MgdE-H247A-Flag-L	F	AATTGCCACCATGGAATTCGTGCCACGGCGTTCCACGA
		R	GTACGCGGGCGCCGACGGGGCGTAGCGGTCGGCGGAGAA
	MgdE-H247A-Flag-R	F	TTCTCCGCCGACCGCTACGCCCCGTCGGCGCCCGCGTAC
		R	CTACTTGTCATCGTCGTCCTTGTAATCGGTACCCCCACCGGTCGGCACGGCCC
	MgdE-S80AD244-Flag-L	F	AATTGCCACCATGGAATTCGTGCCACGGCGTTCCACGA
		R	GCCGTATCCCGTCGCCGTCGCGTCACCAAAGATCATCAG
	MgdE-S80AD244-Flag-M	F	CTGATGATCTTTGGTGACGCGACGGCGACGGGATACGGC
		R	CGCCGACGGGTGGTAGCGGGCGGCGGAGAACATCAGCTC
	MgdE-S80AD244-Flag-R	F	GAGCTGATGTTCTCCGCCGCCCGCTACCACCCGTCGGCG
		R	CTACTTGTCATCGTCGTCCTTGTAATCGGTACCCCCACCGGTCGGCACGGCCC
	MgdE-S80AH247A-Flag-L	F	AATTGCCACCATGGAATTCGTGCCACGGCGTTCCACGA
		R	GCCGTATCCCGTCGCCGTCGCGTCACCAAAGATCATCAG
	MgdE-S80AH247A-Flag-M	F	CTGATGATCTTTGGTGACGCGACGGCGACGGGATACGGC
		R	GTACGCGGGCGCCGACGGGGCGTAGCGGTCGGCGGAGAA
	MgdE-S80AH247A-Flag-R	F	TTCTCCGCCGACCGCTACGCCCCGTCGGCGCCCGCGTAC
		R	CTACTTGTCATCGTCGTCCTTGTAATCGGTACCCCCACCGGTCGGCACGGCCC
	MgdE-D244AH247A-Flag-L	F	AATTGCCACCATGGAATTCGTGCCACGGCGTTCCACGA
		R	TTCTCCGCCGACCGCTACGCCCCGTCGGCGCCCGCGTAC
	MgdE-D244AH247A-Flag-R	F	TTCTCCGCCGACCGCTACGCCCCGTCGGCGCCCGCGTAC
		R	CTACTTGTCATCGTCGTCCTTGTAATCGGTACCCCCACCGGTCGGCACGGCCC
pCAGGS-HA	ASH2L	F	CCAGATTACGCTGAATTCATGGCGGCGGCAGGAGCAG
		R	AAGATCTGCTAGCTCGAGCTAGGGTTCCCATGGGGGACT
	WDR5	F	CCAGATTACGCTGAATTCATGGCAACCAAGGAGTCA
		R	AAGATCTGCTAGCTCGAGTTAGTGGTTACTCATCCA
	RbBP5	F	CCAGATTACGCTGAATTCATGAACCTCGAGTTGCTG
		R	AAGATCTGCTAGCTCGAGCTATAACAGTTCTGAGATTG
pLJR965	MgdE	F	CTACGGGGTCTGACGCTCATGTCGACGACCTCCACCGGGG
		R	CCGAAGCGGGGTTTTCCTACCCACCGGTCGGCACG
	MgdEΔNLS1-L	F	CTACGGGGTCTGACGCTCATGTCGACGACCTCCACCGGGG
		R	GATGGCTTTGGTGCTCAGGCCGGTCTGCTCGGCGAG
	MgdEΔNLS1-R	F	CTCGCCGAGCAGACCGGCCTGAGCACCAAAGCCATC
		R	CCGAAGCGGGGTTTTCCTACCCACCGGTCGGCACG
	MgdEΔNLS2	F	CTACGGGGTCTGACGCTCATGTCGACGACCTCCACCGGGG
		R	CCCGCCGAAGCGGGGTTTTCCTACCCACCGGTCGGCACGGCCCGGGCCGGCGACATCATGCTGTGTCGCG
pLJR965	MgdEΔNLS1-2-L	F	CTACGGGGTCTGACGCTCATGTCGACGACCTCCACCGGGG
		R	GATGGCTTTGGTGCTCAGGCCGGTCTGCTCGGCGAG
	MgdEΔNLS1-2-R	F	CTCGCCGAGCAGACCGGCCTGAGCACCAAAGCCATC
		R	CCCGCCGAAGCGGGGTTTTCCTACCCACCGGTCGGCACGGCCCGGGCCGGCGACATCATGCTGTGTCGCG

## Sheet: Eukaryotes
Species	gene	sequence (5'-3')	sequence primer
Human	Hprt	F	CCTGGCGTCGTGATTAGTGAT
		R	AGACGTTCAGTCCTGTCCATAA
	il1β	F	AGCTACGAATCTCCGACCAC
		R	CGTTATCCCATGTGTCGAAGAA
	il6	F	ACTCACCTCTTCAGAACGAATTG
		R	CCATCTTTGGAAGGTTCAGGTTG
	il10	F	TCAAGGCGCATGTGAACTCC
		R	GATGTCAAACTCACTCATGGCT
	csf1	F	TGGCGAGCAGGAGTATCAC
		R	AGGTCTCCATCTGACTGTCAAT
	csf2	F	TCCTGAACCTGAGTAGAGACAC
		R	TGCTGCTTGTAGTGGCTGG
	csf3	F	GCTGCTTGAGCCAACTCCATA
		R	GAACGCGGTACGACACCTC
Mice	Hprt	F	TCAGTCAACGGGGGACATAAA
		R	GGGGCTGTACTGCTTAACCAG
	il1β	F	GAAATGCCACCTTTTGACAGTG
		R	TGGATGCTCTCATCAGGACAG
	il6	F	CTGCAAGAGACTTCCATCCAG
		R	AGTGGTATAGACAGGTCTGTTGG
	il10	F	AGCCTTATCGGAAATGATCCAGT
		R	GGCCTTGTAGACACCTTGGT
