# Supplementary material for: A conserved mycobacterial nucleomodulin hijacks the host COMPASS complex to reprogram pro-inflammatory transcription and promote intracellular survival
Source: eLife. 2026 Mar 31;14:RP107677. doi: 10.7554/eLife.107677 (PMC13038263; doi:10.7554/eLife.107677)
Supplement: Supplementary file 5. [file elife-107677-supp5.xlsx]

## Sheet: Sheet1
Plasmids used in this study
Reagent	Source	Identifier
EGPF-N1	Addgene	Cat#6085-1
mgdE-pEGFP	this study	N/A
mgdEΔNLS1-pEGFP	this study	N/A
mgdEΔNLS2-pEGFP	this study	N/A
mgdE-ΔNLS1-2-pEGFP	this study	N/A
mgdE-D244AH247A-pEGFP	this study	N/A
pGBKT7	Takara	Cat#630443
pGBKT7-lam	this study	N/A
pGBKT7-p53	this study	N/A
pGBKT7-mgdE	this study	N/A
pGBKT7-mgdE-S80A	this study	N/A
pGBKT7-mgdE-D244A	this study	N/A
pGBKT7-mgdE-H247A	this study	N/A
pGBKT7-mgdE-S80AD244A	this study	N/A
pGBKT7-mgdE-S80AH247A	this study	N/A
pGBKT7-mgdE-D244AH247A	this study	N/A
pGADT7	Takara	Cat#630442
pGADT7-recT	this study	N/A
pGADT7-ash2l	this study	N/A
pGADT7-wdr5	this study	N/A
pGADT7-rbbp5	this study	N/A
pGADT7-dpy30	this study	N/A
pCAGGS-Flag	Addgene	Cat#177095
pCAGGS-HA	Addgene	Cat#206076
pCAGGS-mgdE-Flag	this study	N/A
pCAGGS-mgdE-S80A-Flag	this study	N/A
pCAGGS-mgdE-D244-Flag	this study	N/A
pCAGGS-mgdE-H247A-Flag	this study	N/A
pCAGGS-mgdE-S80AD244-Flag	this study	N/A
pCAGGS-mgdE-S80AH247A-Flag	this study	N/A
pCAGGS-mgdE-D244AH247A-Flag	this study	N/A
pCAGGS-HA-ash2l	this study	N/A
pCAGGS-HA-wdr5	this study	N/A
pCAGGS-HA-rbbp5	this study	N/A
pLJR965	Addgene	Cat#115163
pLJR965-mgdE	this study	N/A
pLJR965-mgdEΔNLS1	this study	N/A
pLJR965-mgdEΔNLS2	this study	N/A
pLJR965-mgdEΔNLS1-2	this study	N/A
