# Supplementary material for: A conserved mycobacterial nucleomodulin hijacks the host COMPASS complex to reprogram pro-inflammatory transcription and promote intracellular survival
Source: eLife. 2026 Mar 31;14:RP107677. doi: 10.7554/eLife.107677 (PMC13038263; doi:10.7554/eLife.107677)
Supplement: Supplementary file 6. [file elife-107677-supp6.xlsx]

## Sheet: Sheet1
Bacterial strains used in this study.
Reagent	Source	Identifier
Mycobacterium bovis BCG (BCG/wt)	ATCC	Cat#35734
BCG mgdE::hyg (KomgdE)	this study	N/A
BCG/pLJR965 (BCG/pLJR965)	this study	N/A
BCG mgdE::hyg/pLJR965 (ΔmgdE)	this study	N/A
BCG mgdE::hyg/pLJR965-mgdE (comp-MgdE)	this study	N/A
BCG mgdE::hyg/pLJR965-mgdE-ΔNLS1 (comp-MgdEΔNLS1)	this study	N/A
BCG mgdE::hyg/pLJR965-mgdE-ΔNLS2 (comp-MgdEΔNLS2)	this study	N/A
BCG mgdE::hyg/pLJR965-mgdE-ΔNLS1-2 (comp-MgdEΔNLS1-2)	this study	N/A
Y2H Gold	TaKaRa	Cat#630489
Y2H Gold/pGADT7-T + pGBKT7-lam	this study	N/A
Y2H Gold/pGADT7-T + pGBKT7-p53	this study	N/A
Y2H Gold/pGADT7-ash2l + pGBKT7	this study	N/A
Y2H Gold/pGADT7-ash2l + pGBKT7-mgdE	this study	N/A
Y2H Gold/pGADT7-ash2l + pGBKT7-mgdE(S80A)	this study	N/A
Y2H Gold/pGADT7-ash2l + pGBKT7-mgdE(D244A)	this study	N/A
Y2H Gold/pGADT7-ash2l + pGBKT7-mgdE(H247A)	this study	N/A
Y2H Gold/pGADT7-ash2l + pGBKT7-mgdE(S80AD244A)	this study	N/A
Y2H Gold/pGADT7-ash2l + pGBKT7-mgdE(S80AH247A)	this study	N/A
Y2H Gold/pGADT7-ash2l + pGBKT7-mgdE(D244AH247A)	this study	N/A
Y2H Gold/pGADT7-wdr5 + pGBKT7	this study	N/A
Y2H Gold/pGADT7-wdr5 + pGBKT7-mgdE	this study	N/A
Y2H Gold/pGADT7-wdr5+ pGBKT7-mgdE(S80A)	this study	N/A
Y2H Gold/pGADT7-wdr5 + pGBKT7-mgdE(D244A)	this study	N/A
Y2H Gold/pGADT7-wdr5 + pGBKT7-mgdE(H247A)	this study	N/A
Y2H Gold/pGADT7-wdr5 + pGBKT7-mgdE(S80AD244A)	this study	N/A
Y2H Gold/pGADT7-wdr5 + pGBKT7-mgdE(S80AH247A)	this study	N/A
Y2H Gold/pGADT7-wdr5 + pGBKT7-mgdE(D244AH247A)	this study	N/A
Y2H Gold/pGADT7-rbbp5 + pGBKT7	this study	N/A
Y2H Gold/pGADT7-rbbp5 + pGBKT7-mgdE	this study	N/A
Y2H Gold/pGADT7-rbbp5+ pGBKT7-mgdE(S80A)	this study	N/A
Y2H Gold/pGADT7-rbbp5 + pGBKT7-mgdE(D244A)	this study	N/A
Y2H Gold/pGADT7-rbbp5 + pGBKT7-mgdE(H247A)	this study	N/A
Y2H Gold/pGADT7-rbbp5 + pGBKT7-mgdE(S80AD244A)	this study	N/A
Y2H Gold/pGADT7-rbbp5 + pGBKT7-mgdE(S80AH247A)	this study	N/A
Y2H Gold/pGADT7-rbbp5 + pGBKT7-mgdE(D244AH247A)	this study	N/A
Y2H Gold/pGADT7-dpy30 + pGBKT7	this study	N/A
Y2H Gold/pGADT7-dpy30 + pGBKT7-mgdE	this study	N/A
Y2H Gold/pGADT7-dpy30+ pGBKT7-mgdE(S80A)	this study	N/A
Y2H Gold/pGADT7-dpy30 + pGBKT7-mgdE(D244A)	this study	N/A
Y2H Gold/pGADT7-dpy30 + pGBKT7-mgdE(H247A)	this study	N/A
Y2H Gold/pGADT7-dpy30 + pGBKT7-mgdE(S80AD244A)	this study	N/A
Y2H Gold/pGADT7-dpy30 + pGBKT7-mgdE(S80AH247A)	this study	N/A
Y2H Gold/pGADT7-dpy30 + pGBKT7-mgdE(D244AH247A)	this study	N/A
